# Supplementary material for: Integrating Germline and Somatic Mutation Information for the Discovery of Biomarkers in Triple-Negative Breast Cancer
Source: MDPI journal article supplement (doi:10.3390/ijerph16061055), 2019-03-23
Supplement: s1 [file s1]

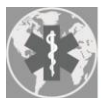

*Supplementary Materials*

# **Integrating Germline and Somatic Mutation Information for the Discovery of Biomarkers in Triple Negative Breast Cancer**

Jiande Wu <sup>1</sup>, Tarun Karthik Kumar Mamidi <sup>1</sup>, Lu Zhang <sup>2</sup> and Chindo Hicks <sup>1, \*</sup>

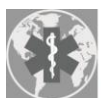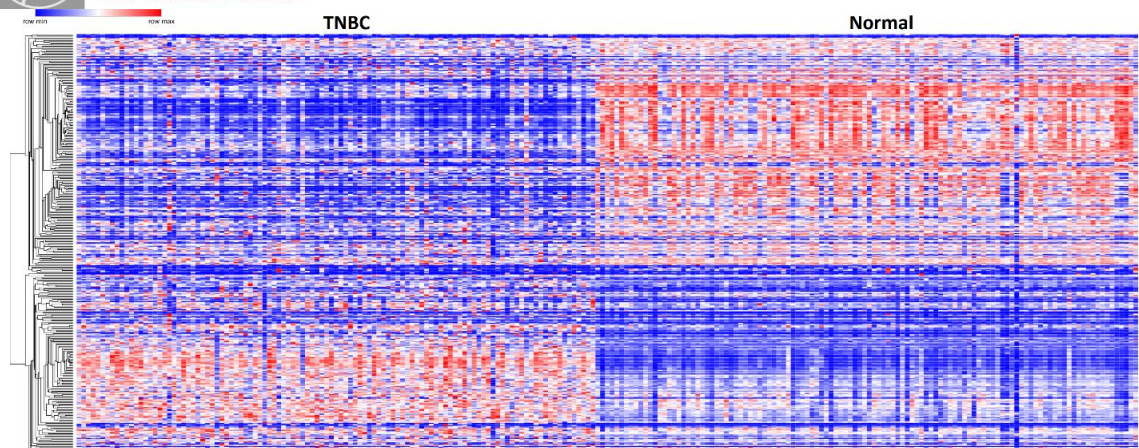

**Figure S1.** Patterns of gene expression profiles for the 366 genes. The heat map includes 267 genes from significantly differentially expressed genes containing only germline mutations and 99 somatic mutated genes found to be highly significantly differentially expressed and have > 2 somatic mutation events per gene.

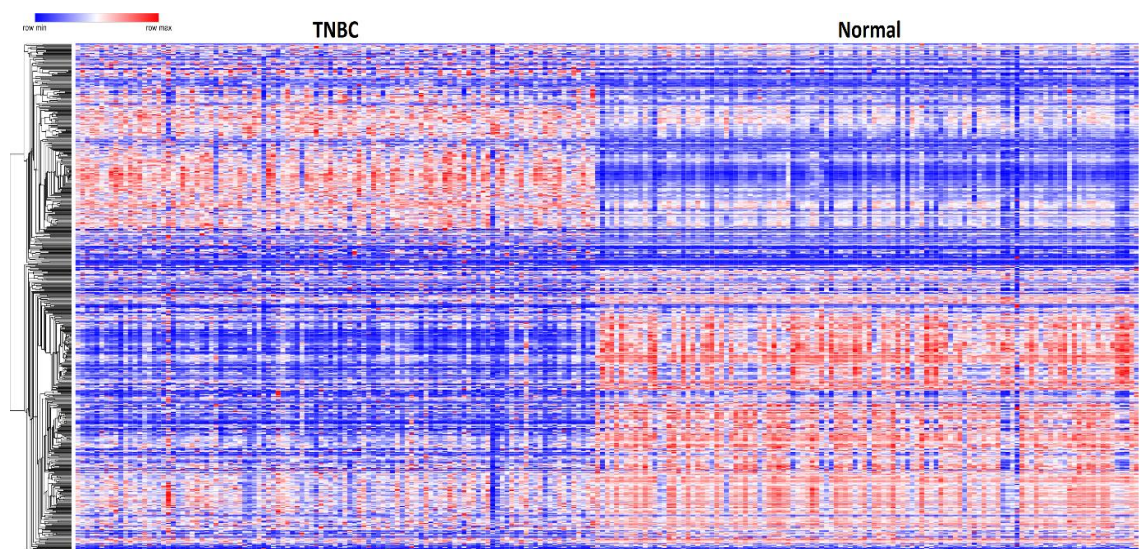

**Figure 2.** Patterns of gene expression for 237 genes containing both germline and somatic mutations, 267 genes containing germline mutations only and 99 highly somatic mutated genes significantly associated with TNBC.
