# Supplementary material for: Integrating Germline and Somatic Mutation Information for the Discovery of Biomarkers in Triple-Negative Breast Cancer
Source: Int J Environ Res Public Health. 2019 Mar 23;16(6):1055. doi: 10.3390/ijerph16061055 (PMC6466377; doi:10.3390/ijerph16061055)
Supplement: Supplementary file 1 [file ijerph-16-01055-s001.zip]

Archive with 8 entries (8 files):
- ijerph-463945 Supplementary Figures.pdf
- JIANDE-TNBC-TABLE S1A.xlsx
- JIANDE-TNBC-TABLE S1B.xlsx
- JIANDE-TNBC-TABLE S4A-SUBMITTED-14FEB.xlsx
- JIANDE-TNBC-TABLE S4B-SUBMITTED-14FEB2019.xlsx
- JIANDE-TNBC-TABLES S2-FV-632G-SUBMITTED-14FEB2019.xlsx
- JIANDE-TNBC-TABLES S3-FV-237G-SUBMITTED-14FEB2019.xlsx
- JIANDE-TNBC-TABLES-SA-GWAS_FV-SUPPL- NEWCATALOGUE-14FEB2019.xlsx
