# Supplementary material for: Integrating Germline and Somatic Mutation Information for the Discovery of Biomarkers in Triple-Negative Breast Cancer
Source: Int J Environ Res Public Health. 2019 Mar 23;16(6):1055. doi: 10.3390/ijerph16061055 (PMC6466377; doi:10.3390/ijerph16061055)
Supplement: Supplementary file 1 [file ijerph-16-01055-s001.zip › JIANDE-TNBC-TABLE S1A.xlsx]

## Sheet: 07.TNBC.5502.DE.Som.comm.gene.e
Table S1A. List of significantly differentially expressed somatic mutated genes along with the number of somatic mutation events and adjusted expression p-values.
Gene names	Chromosome position	Adjusted expression P-value	Somatic mutation Events
TTN	2q31.2	0.0127127	27
MUC16	19p13.2	9.79421e-06	11
OBSCN	1q42.13	0.00120865	10
SPTA1	1q23.1	4.5843e-05	9
SYNE1	6q25.2	1.11417e-44	9
DNAH17	17q25.3	4.7446e-05	8
DST	6p12.1	1.88211e-50	8
MUC5B	11p15.5	8.86779e-21	8
PIK3CA	3q26.32	2.58966e-09	8
AHCTF1	1q44	2.54052e-09	7
ASPM	1q31.3	3.26788e-68	7
CREBBP	16p13.3	3.83386e-06	7
CSMD2	1p35.1	1.38407e-12	7
FLG	1q21.3	0.0182049	7
KMT2D	12q13.12	9.51689e-07	7
PLEC	8q24.3	0.000153621	7
SMG1	16p12.3	0.0401141	7
USP34	2p15	0.000850126	7
AHNAK	11q12.3	2.29168e-61	6
ARID1B	6q25.3	7.24754e-05	6
CACNA1B	9q34.3	9.7873e-08	6
CENPE	4q24	2.29031e-60	6
COL18A1	21q22.3	0.00757425	6
F5	1q24.2	6.46784e-08	6
IGSF10	3q25.1	2.62554e-38	6
KIF26B	1q44	9.80238e-26	6
LAMA3	18q11.2	3.55326e-41	6
LRP1	12q13.3	5.48628e-33	6
LYST	1q42.3	1.3897e-21	6
MFI2	-	5.09295e-13	6
SAGE1	Xq26.3	0.0459103	6
SPTBN1	2p16.2	2.22878e-34	6
STAB1	3p21.1	2.20154e-06	6
ZNF512B	20q13.33	2.72808e-08	6
ABCA13	7p12.3	2.23226e-06	5
ACTN2	1q43	0.0253113	5
AK9	6q21	0.000773741	5
ANKRD30A	10p11.21	4.07474e-31	5
ANKRD30BL	2q21.2	0.0172312	5
ANKRD36C	2q11.1	1.42408e-08	5
APOB	2p24.1	4.70386e-20	5
BRCA1	17q21.31	3.94602e-07	5
C15orf39	15q24.2	2.04958e-05	5
C2orf16	2p23.3	8.19021e-05	5
CYP26B1	2p13.2	5.62371e-07	5
DIDO1	20q13.33	0.0150071	5
DLC1	8p22	5.37441e-37	5
DNAH3	16p12.3	0.0021344	5
DNAH5	5p15.2	7.48742e-15	5
DOCK4	7q31.1	3.21509e-10	5
ERBB4	2q34	9.03183e-41	5
FAM65C	-	7.44164e-18	5
FBXW7	4q31.3	2.17807e-17	5
FHOD3	18q12.2	1.62409e-19	5
FREM1	9p22.3	1.76507e-47	5
FRG1	4q35.2	8.85789e-07	5
GCC2	2q12.3	5.76502e-15	5
GOLGB1	3q13.33	1.64147e-12	5
GPR98	-	3.56244e-19	5
HSPA12A	10q25.3	2.99304e-29	5
HSPG2	1p36.12	1.04825e-11	5
ITGAX	16p11.2	2.7463e-13	5
ITIH1	3p21.1	0.0084338	5
ITPR2	12p11.23	1.1356e-10	5
LAMB4	7q31.1	0.00454395	5
LRP2	2q31.1	1.31843e-13	5
MAP1A	15q15.3	5.51161e-31	5
MECOM	3q26.2	4.14749e-22	5
MXRA5	Xp22.33	0.00219219	5
NBAS	2p24.3	9.07356e-11	5
NF1	17q11.2	2.1085e-12	5
PCDH19	Xq22.1	8.03875e-44	5
PKD1L1	7p12.3	2.13189e-19	5
PKHD1L1	8q23.1-q23.2	2.08292e-22	5
PLIN4	19p13.3	1.25084e-52	5
PREX1	20q13.13	6.40917e-09	5
PTEN	10q23.31	1.10221e-32	5
PXDNL	8q11.22-q11.23	0.00880287	5
RNF213	17q25.3	0.00692116	5
RPGR	Xp11.4	4.49454e-29	5
RYR3	15q13.3-q14	2.97126e-15	5
SACS	13q12.12	9.2685e-08	5
SLC12A5	20q13.12	2.87299e-07	5
SUPT6H	17q11.2	1.19566e-06	5
SYNE2	14q23.2	2.81206e-14	5
TCF20	22q13.2	8.31762e-10	5
TDRD5	1q25.2	3.90625e-05	5
TENM1	Xq25	0.00517324	5
TG	8q24.22	0.0212185	5
TNIK	3q26.2-q26.31	0.000484143	5
TNRC6B	22q13.1	9.59053e-06	5
TNXB	6p21.33-p21.32	3.00963e-67	5
TPR	1q31.1	0.000859264	5
TRPM5	11p15.5	0.0487786	5
VWF	12p13.31	8.88184e-43	5
ZFHX4	8q21.13	3.62282e-16	5
ZFP64	20q13.2	9.76845e-20	5
AARS	16q22.1	4.70691e-19	4
ABCC10	6p21.1	3.19932e-18	4
ACE	17q23.3	3.54236e-05	4
AGAP1	2q37.2	0.000116583	4
AMPD1	1p13.2	1.1381e-10	4
ANK2	4q25-q26	1.32255e-41	4
APOBR	16p12.1	3.95077e-08	4
ARFGEF1	8q13.2	0.0200632	4
ARHGAP24	4q21.23-q21.3	4.05162e-44	4
ARHGAP5	14q12	6.22093e-15	4
ASTN1	1q25.2	1.01237e-11	4
ASXL3	18q12.1	0.00137439	4
ATXN2	12q24.12	0.0143662	4
ATXN7L1	7q22.3	0.0397726	4
BAZ2B	2q24.2	2.91545e-23	4
BCORL1	Xq26.1	0.0139668	4
BIRC6	2p22.3	0.0102672	4
BRWD1	21q22.2	0.00156917	4
BZRAP1	-	0.00296166	4
CACNA1E	1q25.3	0.000283626	4
CACNA1F	Xp11.23	2.66456e-14	4
CARD11	7p22.2	4.32236e-07	4
CCDC168	13q33.1	3.38533e-06	4
CELSR3	3p21.31	6.40326e-16	4
CHD2	15q26.1	7.1711e-10	4
CHD6	20q12	1.85219e-11	4
CKAP5	11p11.2	2.42585e-27	4
CLIP2	7q11.23	8.52952e-06	4
CNTNAP2	7q35-q36.1	2.35289e-05	4
COL19A1	6q13	0.00204932	4
COL5A1	9q34.3	5.747e-15	4
COL6A5	3q22.1	1.41571e-07	4
COL6A6	3q22.1	7.47241e-47	4
CPS1	2q34	1.77889e-15	4
CSRNP3	2q24.3	3.90002e-18	4
CUL7	6p21.1	0.000591331	4
DDX26B	-	0.0334287	4
DDX55	12q24.31	1.26073e-08	4
DENND5B	12p11.21	3.34736e-22	4
DMD	Xp21.2-p21.1	2.41829e-40	4
DNAH14	1q42.12	8.45418e-28	4
DNAH9	17p12	1.29428e-15	4
DOCK9	13q32.3	3.78893e-19	4
DSCAM	21q22.2	0.0428009	4
DYNC2H1	11q22.3	9.12307e-39	4
EFR3B	2p23.3	0.000451433	4
EIF2AK4	15q15.1	1.13338e-07	4
EML5	14q31.3	8.75421e-07	4
EPB41L3	18p11.31	2.19771e-13	4
EPHB3	3q27.1	1.5102e-13	4
ESPNP	1p36.13	5.79034e-10	4
FAM49B	8q24.21	4.2279e-37	4
FANCI	15q26.1	1.04308e-53	4
FAT1	4q35.2	0.0201302	4
FGD5	3p25.1	1.88378e-28	4
FREM2	13q13.3	6.86041e-06	4
FRMPD2	10q11.22	7.86725e-10	4
GON4L	1q22	0.00797363	4
GPR112	-	2.39274e-07	4
GYG2	Xp22.33	5.42417e-32	4
HCFC1	Xq28	1.0696e-14	4
HERC1	15q22.31	7.81024e-27	4
HERC2	15q13.1	5.39209e-11	4
HIVEP2	6q24.2	2.7917e-06	4
HMCN1	1q25.3-q31.1	1.54087e-13	4
IDS	Xq28	2.0096e-16	4
INPP5B	1p34.3	4.76335e-06	4
IQGAP2	5q13.3	3.63672e-23	4
IQGAP3	1q22	3.35037e-71	4
ITIH4	3p21.1	0.000396681	4
ITSN2	2p23.3	2.09245e-07	4
KAT6B	10q22.2	1.00877e-18	4
KCNU1	8p11.23	3.82274e-07	4
KIAA0907	-	4.49643e-16	4
KIAA1244	-	0.00865218	4
KIF24	9p13.3	8.18033e-31	4
KIF4A	Xq13.1	1.86555e-83	4
KIF5C	2q23.1-q23.2	4.65833e-12	4
LAMA2	6q22.33	3.34891e-54	4
LGR5	12q21.1	0.000474965	4
LINC00969	-	0.0182206	4
LRP1B	2q22.1-q22.2	1.19983e-12	4
LRRC32	11q13.5	2.01466e-19	4
MACF1	1p34.3	2.90908e-07	4
MAP3K12	12q13.13	9.56118e-21	4
MEGF8	19q13.2	4.98487e-08	4
MROH5	8q24.3	0.021526	4
MSH3	5q14.1	2.45327e-30	4
MUC6	11p15.5	1.34293e-08	4
MYH10	17p13.1	1.48171e-14	4
MYH11	16p13.11	4.31985e-71	4
MYO10	5p15.1	1.55776e-25	4
MYO15A	17p11.2	0.0296592	4
MYT1	20q13.33	0.00559757	4
NAV3	12q21.2	3.46443e-51	4
NBEA	13q13.3	1.439e-21	4
NIPBL	5p13.2	4.08618e-07	4
NOTCH1	9q34.3	0.00241286	4
NRXN2	11q13.1	0.0363437	4
OTUD7A	15q13.3	5.67924e-42	4
PASK	2q37.3	4.12158e-18	4
PCLO	7q21.11	1.01723e-12	4
PDE1B	12q13.2	7.42454e-19	4
PKD1L2	16q23.2	2.0306e-14	4
PREX2	8q13.2	3.49111e-46	4
PRUNE	-	2.90029e-15	4
PRUNE2	9q21.2	4.13643e-18	4
RALGAPA2	20p11.23	9.84375e-25	4
RBMX	Xq26.3	0.0411937	4
RELN	7q22.1	8.35934e-21	4
REPIN1	7q36.1	1.11626e-05	4
RIMBP2	12q24.33	1.02329e-08	4
ROBO3	11q24.2	3.87016e-27	4
RP1	8q11.23-q12.1	0.0128904	4
RPLP0P2	11q12.2	1.63086e-28	4
SCN1A	2q24.3	0.00326427	4
SCN2A	2q24.3	1.72829e-12	4
SERPINE1	7q22.1	0.000803731	4
SMC6	2p24.2	1.17272e-30	4
SNRNP200	2q11.2	0.00745098	4
SP100	2q37.1	0.000112972	4
SPAG17	1p12	7.67049e-05	4
SPG20	-	1.8209e-31	4
SRRM2	16p13.3	1.35237e-08	4
STXBP5	6q24.3	4.38586e-05	4
SUPT5H	19q13.2	3.52738e-17	4
SZT2	1p34.2	3.71272e-09	4
TCHH	1q21.3	0.0130551	4
TECTA	11q23.3	7.24636e-19	4
TLN1	9p13.3	1.35715e-15	4
TMPRSS15	21q21.1	0.0397599	4
TNRC6C	17q25.3	4.32462e-12	4
TRIM46	1q22	1.1401e-17	4
TRO	Xp11.21	2.16809e-10	4
TRPM6	9q21.13	1.13666e-05	4
TTF2	1p13.1	3.19956e-16	4
TUBBP5	9q34.3	3.20982e-06	4
UBN2	7q34	0.00287292	4
UBR2	6p21.1	0.000820465	4
UTRN	6q24.2	4.20993e-46	4
VPS13D	1p36.22-p36.21	2.4249e-25	4
XPO1	2p15	4.79107e-13	4
ZDBF2	2q33.3	1.32834e-17	4
ZFPM2	8q23	3.45914e-20	4
ZFYVE28	4p16.3	4.51857e-12	4
ZNF318	6p21.1	0.0279262	4
ZNF469	16q24.2	1.33927e-20	4
ZNF687	1q21.3	1.48302e-15	4
AAK1	2p13.3	0.000103026	3
ABCA10	17q24.3	4.60584e-72	3
ABCA6	17q24.2-q24.3	2.33854e-58	3
ABCA9	17q24.2	7.96543e-68	3
ABCB5	7p21.1	2.56411e-34	3
ABCD3	1p21.3	7.80924e-05	3
ABR	17p13.3	1.93143e-10	3
ACTN4	19q13.2	1.78899e-05	3
ADAMTSL3	15q25.2	5.03819e-07	3
ADCY2	5p15.31	0.0114166	3
ADCY9	16p13.3	1.31268e-25	3
AGO3	1p34.3	8.3741e-05	3
AIM1	-	2.92615e-05	3
AKAP13	15q25.3	2.12072e-08	3
AKAP9	7q21.2	2.70233e-06	3
ALOX15B	17p13.1	3.35593e-07	3
ALS2	2q33.1	0.00712933	3
AMER1	Xq11.2	4.08548e-22	3
ANK3	10q21.2	0.014643	3
ANKAR	2q32.2	7.27666e-20	3
ANKRD30B	18p11.21	2.84935e-15	3
APC	5q22.2	1.51286e-23	3
AQR	15q14	7.60765e-10	3
ARAP3	5q31.3	2.66869e-23	3
ARHGAP26	5q31.3	3.9178e-23	3
ARHGAP35	19q13.32	4.32898e-15	3
ARHGAP42	11q22.1	2.50508e-11	3
ARHGEF11	1q23.1	1.31529e-10	3
ARHGEF1	19q13.2	5.99098e-13	3
ARHGEF2	1q22	7.44619e-13	3
ASB13	10p15.1	0.0373281	3
ASH1L	1q22	5.39119e-06	3
ASXL2	2p23.3	0.000116247	3
ATAD2B	2p24.1-p23.3	1.55227e-05	3
ATM	11q22.3	1.35237e-08	3
ATP1A2	1q23.2	9.91932e-56	3
ATP1A3	19q13.2	2.94763e-07	3
ATP2B4	1q32.1	1.58503e-20	3
ATP9A	20q13.2	1.94166e-13	3
ATXN1	6p22.3	3.92454e-06	3
B4GALNT4	11p15.5	2.78174e-23	3
BACH2	6q15	3.60137e-12	3
BAHCC1	17q25.3	0.0279713	3
BBX	3q13.12	6.06771e-12	3
BDP1	5q13.2	7.22156e-17	3
BPTF	17q24.2	0.00186488	3
BRINP3	1q31.1	0.00475319	3
C16orf62	-	1.31323e-07	3
C1orf127	1p36.22	0.0308253	3
CA9	9p13.3	6.52388e-25	3
CACNA1C	12p13.33	3.38728e-11	3
CACNA1H	16p13.3	0.000413342	3
CAMTA2	17p13.2	6.26738e-26	3
CASKIN1	16p13.3	7.90393e-05	3
CASKIN2	17q25.1	2.87156e-06	3
CASZ1	1p36.22	0.000682651	3
CCDC180	9q22.33	1.04721e-08	3
CCDC50	3q28	3.35763e-31	3
CCDC74A	2q21.1	3.83778e-07	3
CCPG1	15q21.3	1.62893e-27	3
CD86	3q13.33	1.46093e-14	3
CD9	12p13.31	2.06566e-07	3
CDH11	16q21	2.0324e-06	3
CEP170	1q43	3.58479e-09	3
CHD9	16q12.2	6.54723e-29	3
CHRNA1	2q31.1	0.0244177	3
CHST9	18q11.2	1.51589e-11	3
CMYA5	5q14.1	4.54536e-30	3
CNKSR3	6q25.2	9.15868e-10	3
CNNM2	10q24.32	0.000341445	3
CNTN1	12q12	7.56986e-19	3
CNTN6	3p26.3	3.19896e-12	3
CNTNAP1	17q21.2	8.69268e-09	3
COL14A1	8q24.12	1.13178e-43	3
COL4A5	Xq22.3	2.58613e-09	3
COL7A1	3p21.31	0.000812219	3
COPE	19p13.11	1.77891e-28	3
CPSF3L	-	0.00237444	3
CUBN	10p13	2.03599e-09	3
CXorf22	-	1.23945e-08	3
CYBRD1	2q31.1	3.68874e-61	3
CYP4A11	1p33	5.20461e-06	3
CYP7A1	8q12.1	2.2048e-05	3
DALRD3	3p21.31	1.33231e-11	3
DDX11	12p11.21	9.55918e-20	3
DENND4B	1q21.3	1.53769e-11	3
DGKD	2q37.1	0.000108443	3
DIP2C	10p15.3	5.33325e-17	3
DMGDH	5q14.1	9.36621e-27	3
DMXL1	5q23.1	7.3258e-40	3
DNAH10	12q24.31	0.00158216	3
DNAH11	7p15.3	3.31747e-08	3
DNAH6	2p11.2	1.95479e-35	3
DNAH7	2q32.3	3.7052e-22	3
DNAH8	6p21.2	1.94923e-06	3
DNAJC13	3q22.1	0.00218159	3
DNHD1	11p15.4	8.73615e-07	3
DOCK11	Xq24	1.5832e-20	3
DOCK8	9p24.3	2.74289e-09	3
DSCAML1	11q23.3	0.00132392	3
E2F4	16q22.1	1.42818e-12	3
EGFR	7p11.2	7.03007e-13	3
EIF4A2	3q27.3	2.30267e-11	3
ELTD1	-	9.77951e-42	3
ENAM	4q13.3	2.97179e-05	3
ENPP5	6p21.1	0.021455	3
EP300	22q13.2	0.000425908	3
EP400	12q24.33	0.00161503	3
EPB41L2	6q23.1-q23.2	3.87315e-18	3
EPG5	18q12.3-q21.1	8.12481e-12	3
EPHB1	3q22.2	2.12294e-08	3
EPS15	1p32.3	7.22074e-12	3
ERGIC3	20q11.22	5.45573e-08	3
ESPN	1p36.31	0.0183431	3
EXO1	1q43	7.42934e-71	3
EYS	6q12	4.90846e-07	3
FADS2	11q12.2	4.03054e-20	3
FAM171B	2q32.1	0.00217393	3
FAM86B2	8p23.1	3.61613e-05	3
FAM98A	2p22.3	2.74641e-23	3
FANCD2	3p25.3	3.04991e-38	3
FBN2	5q23.3	2.4002e-14	3
FCHSD1	5q31.3	0.000591446	3
FER1L6	8q24.13	0.0451613	3
FLNC	7q32.1	5.75005e-21	3
FMN2	1q43	0.00909216	3
FRMD6	14q22.1	3.54622e-28	3
FRYL	4p11	4.05866e-16	3
FURIN	15q26.1	3.41286e-06	3
GANAB	11q12.3	3.24584e-12	3
GART	21q22.11	1.45534e-27	3
GGA1	22q13.1	3.13809e-08	3
GJA5	1q21.2	0.011023	3
GLB1	3p22.3	8.24744e-15	3
GOLGA1	9q33.3	9.05234e-20	3
GOLGA8G	15q13.1	0.0314728	3
GREB1	2p25.1	7.12278e-24	3
GREB1L	18q11.1-q11.2	4.56278e-05	3
GRIA3	Xq25	1.49765e-12	3
GRIN2B	12p13.1	1.09746e-06	3
GRIPAP1	Xp11.23	0.00686238	3
GRM3	7q21.11-q21.12	2.47212e-07	3
HAUS7	Xq28	3.59874e-16	3
HEATR1	1q43	8.13283e-12	3
HEATR5A	14q12	3.03346e-06	3
HECTD1	14q12	9.59276e-15	3
HELB	12q14.3	0.029289	3
HLA-C	6p21.33	1.24319e-12	3
HMGXB3	5q32	0.00537487	3
HNRNPU	1q44	1.45381e-22	3
HPS3	3q24	0.00966552	3
HRC	19q13.33	2.62767e-25	3
HRNR	1q21.3	0.00346614	3
IGFN1	1q32.1	0.00196916	3
IKBKE	1q32.1	7.62843e-24	3
IL6ST	5q11.2	4.09382e-63	3
IMPA2	18p11.21	1.75449e-21	3
INMT	7p14.3	1.49694e-58	3
INTS1	7p22.3	2.15684e-06	3
ITGAL	16p11.2	5.98374e-05	3
ITGB2	21q22.3	5.36618e-12	3
ITGB6	2q24.2	0.0421821	3
ITPR3	6p21.31	4.81764e-10	3
KANSL3	2q11.2	6.36904e-09	3
KAT2A	17q21.2	0.00367155	3
KCND3	1p13.2	2.46414e-43	3
KCNMA1	10q22.3	2.20586e-22	3
KCNQ3	8q24.22	3.30549e-07	3
KCNV1	8q23.2	0.000149581	3
KIAA0319L	1p34.3	3.7711e-05	3
KIAA0825	5q15	1.5196e-15	3
KIAA1033	-	1.344e-07	3
KIAA1429	-	0.0209879	3
KIF20B	10q23.31	3.11008e-20	3
KIF21A	12q12	7.90121e-10	3
KIF27	9q21.32	1.1249e-05	3
KIFC1	6p21.32	2.93738e-84	3
KMT2C	7q36.1	2.96725e-12	3
KPNA2	17q24.2	2.1904e-68	3
L1CAM	Xq28	3.57037e-05	3
LAMB2	3p21.31	6.50831e-39	3
LCT	2q21.3	4.98319e-08	3
LGR4	11p14.1	1.8059e-21	3
LHCGR	2p16.3	1.10014e-16	3
LIG1	19q13.33	8.56985e-22	3
LOXHD1	18q21.1	3.0708e-07	3
LPHN3	-	3.56404e-13	3
LPP	3q27.3-q28	5.02146e-22	3
LRRC37A3	17q24.1	0.000630141	3
LRRC8C	1p22.2	8.42944e-05	3
LRRK2	12q12	3.06599e-27	3
LSM14B	20q13.33	1.97071e-26	3
LTBP4	19q13.1-q13.2	1.03701e-43	3
MAML2	11q21	5.01873e-14	3
MAMLD1	Xq28	0.0478596	3
MAN1A1	6q22.31	3.06723e-22	3
MAN2A1	5q21.3	7.05166e-10	3
MAN2B1	19p13.13	9.58737e-24	3
MAN2B2	4p16.1	9.96283e-20	3
MAPK6	15q21.2	0.000555357	3
2019-03-10	17q23.3	0.0342734	3
2019-03-06	5p15.2	4.91337e-07	3
MIA3	1q41	0.0271906	3
MMRN1	4q22.1	1.97289e-49	3
MPG	16p13.3	5.76325e-05	3
MPZL1	1q24.2	0.000455499	3
MRPL55	1q42.13	1.84066e-22	3
MST1L	1p36.13	4.73131e-08	3
MTA2	11q12.3	4.15548e-21	3
MTHFR	1p36.22	8.72396e-13	3
MTPAP	10p11.23	2.80187e-14	3
MYH1	17p13.1	8.86575e-09	3
MYH3	17p13.1	9.5494e-21	3
MYH7B	20q11.22	9.2127e-11	3
MYO16	13q33.3	6.19678e-10	3
MYO9A	15q23	6.3231e-22	3
NAALADL1	11q13.1	1.10695e-38	3
NCF2	1q25.3	2.67903e-07	3
NCKAP5	2q21.2	0.0237539	3
NCOR1	17p12-p11.2	3.094e-12	3
NES	1q23.1	5.82044e-05	3
NID1	1q42.3	2.45586e-08	3
NKTR	3p22.1	6.98059e-13	3
NLRP13	19q13.43	1.38332e-12	3
NLRP7	19q13.42	9.99339e-06	3
NOP14	4p16.3	0.00616222	3
NOTCH2	1p12	3.87505e-06	3
NPHP1	2q13	2.96228e-18	3
NPLOC4	17q25.3	2.41793e-15	3
NR5A2	1q32.1	5.04255e-48	3
NUSAP1	15q14	4.19822e-73	3
NWD1	19p13.11	0.0164603	3
OGDHL	10q11.23	4.45741e-08	3
OTOG	11p15.1	7.65152e-06	3
P4HB	17q25.3	1.52104e-34	3
PACS1	11q13.1-q13.2	0.00826272	3
PALB2	16p12.2	1.62105e-07	3
PAPPA2	1q25.2	2.54821e-28	3
PARP1	1q42.12	4.14973e-45	3
PCCB	3q22.3	0.00470374	3
PCDHA10	5q31.3	2.03816e-07	3
PCDHA13	5q31.3	1.05934e-07	3
PCDHB10	5q31.3	0.0014841	3
PCDHB12	5q31.3	4.61307e-28	3
PCDHGA5	5q31	1.01552e-23	3
PCDHGB4	5q31	0.00222903	3
PCMTD2	20q13.33	5.43228e-14	3
PCNXL2	-	0.00580055	3
PDCD11	10q24.33	5.32102e-12	3
PDE3A	12p12.2	4.34632e-08	3
PDIA5	3q21.1	5.65557e-29	3
PEAR1	1q23.1	7.75191e-64	3
PER1	17p13.1	3.01144e-53	3
PER2	2q37.3	6.80552e-39	3
PHACTR1	6p24.1	0.010115	3
PHKB	16q12.1	4.15128e-21	3
PI4KB	1q21.3	3.75521e-12	3
PIGQ	16p13.3	0.00123181	3
PIGR	1q32.1	4.82064e-22	3
PIK3C2B	1q32.1	1.85305e-22	3
PIK3CD	1p36.22	0.0453437	3
PIK3R4	3q22.1	3.56825e-08	3
PKD1	16p13.3	3.70765e-16	3
PLA2R1	2q23-q24	2.15867e-41	3
PLAC8	4q21.22	0.000234469	3
PLCE1	10q23.33	0.00848274	3
PLEKHG2	19q13.2	6.34653e-07	3
PLXNA3	Xq28	3.36782e-23	3
PLXNB3	Xq28	0.000772911	3
PMEL	12q13.2	2.21305e-11	3
POLA1	Xp22.11-p21.3	4.39375e-05	3
PPEF1	Xp22.13	7.00646e-06	3
PPIP5K2	5q21.1	2.17885e-06	3
PPP1R12A	12q21.2-q21.31	1.06455e-10	3
PRICKLE3	Xp11.23	4.54344e-07	3
PROX2	14q24.3	4.33204e-16	3
PRRC2B	9q34.13	7.31572e-08	3
PRTG	15q21.3	4.67713e-18	3
PTPRB	12q15	4.94171e-52	3
PTPRZ1	7q31.32	0.00745869	3
QRICH2	17q25.1	8.43089e-07	3
QSOX1	1q25.2	4.49371e-05	3
RAB13	1q21.3	1.06457e-14	3
RAI2	Xp22.13	1.65469e-67	3
RALGAPA1	14q13.2	8.41075e-19	3
RALGAPB	20q11.23	0.000412866	3
RALY	20q11.22	7.45318e-29	3
RBM22	5q33.1	2.34492e-09	3
RBM42	19q13.12	3.856e-18	3
RC3H1	1q25.1	2.88787e-05	3
RFC1	4p14	4.38335e-08	3
RFX1	19p13.12	0.0290313	3
RNF128	Xq22.3	5.08593e-08	3
RPL13A	19q13.33	0.028933	3
RUSC1	1q22	1.10578e-34	3
SAMD9	7q21.2	0.00905537	3
SCN11A	3p22.2	9.46892e-19	3
SCN5A	3p22.2	1.71039e-09	3
SCN7A	2q24.3	1.48494e-42	3
SCYL1	11q13.1	5.6537e-16	3
SDK2	17q25.1	0.000908165	3
SEC16B	1q25.2	1.05343e-09	3
SEMA4A	1q22	3.19002e-10	3
SETBP1	18q12.3	2.05296e-30	3
SHE	1q21.3	1.78173e-52	3
SHISA6	17p12	5.40604e-20	3
SHROOM3	4q21.1	0.000487113	3
SIDT2	11q23.3	1.29262e-43	3
SIGLEC6	19q13.41	2.35853e-06	3
SIPA1L2	1q42.2	3.58561e-07	3
SLC4A3	2q35	0.00248708	3
SLC5A5	19p13.11	0.00432254	3
SMAP1	6q13	3.78174e-05	3
SMARCA4	19p13.2	2.02068e-29	3
SMARCAD1	4q22.3	0.000312167	3
SMC1A	Xp11.22	8.14043e-08	3
SNCAIP	5q23.2	3.49912e-13	3
SNX8	7p22.3	1.2127e-15	3
SON	21q22.11	1.4745e-06	3
SOX13	1q32.1	0.0310018	3
SPEF2	5p13.2	5.27428e-20	3
SPTB	14q23.3	0.00114326	3
SSC5D	19q13.42	1.08216e-15	3
SSPO	7q36.1	0.000269438	3
SSRP1	11q12.1	1.60892e-25	3
STAT4	2q32.2-q32.3	0.0135134	3
STX4	16p11.2	0.0021248	3
SUGP1	19p13	7.37767e-11	3
SUV420H1	-	0.00737511	3
SVEP1	9q31.3	1.60387e-59	3
SYNE3	14q32.13	1.78143e-37	3
SYT11	1q22	0.000771022	3
SYT9	11p15.4	2.14607e-13	3
TBCD	17q25.3	1.0403e-12	3
TBX15	1p12	7.23563e-34	3
TBX3	12q24.21	3.27878e-21	3
TCP11L2	12q23.3	1.27695e-41	3
TEC	4p12-p11	6.38173e-05	3
TENM2	5q34	7.95484e-25	3
TEP1	14q11.2	7.65162e-06	3
TET1	10q21.3	3.16013e-05	3
TET2	4q24	0.00311617	3
TEX11	Xp11	3.32519e-06	3
TFE3	Xp11.23	4.4331e-09	3
THBS4	5q14.1	3.43714e-14	3
THSD7A	7p21.3	1.06114e-23	3
TLN2	15q22.2	1.45702e-35	3
TM4SF1	3q25.1	0.018285	3
TMEM131	2q11.2	0.00357717	3
TOPBP1	3q22.1	3.5811e-15	3
TPO	2p25.3	9.83466e-45	3
TRAPPC9	8q24.3	6.92553e-12	3
TRIM23	5q12.3	1.63835e-47	3
TROAP	12q13.12	2.07499e-80	3
TRPA1	8q21.11	1.14423e-07	3
TRPC6	11q22.1	6.53661e-38	3
TRPM2	21q22.3	2.0989e-24	3
TSC2	16p13.3	0.000156258	3
TSR1	17p13.3	0.00147931	3
TTC3	21q22.13	1.18574e-06	3
TUBA3E	2q21.1	0.00120724	3
TULP3	12p13.33	0.000206505	3
TYRO3	15q15.1	4.72596e-10	3
TYRP1	9p23	4.6285e-06	3
U2SURP	3q23	0.00989046	3
UBA1	Xp11.3	3.70716e-19	3
UBC	12q24.3	2.686e-06	3
UBR3	2q31.1	3.35871e-17	3
UCK2	1q24.1	1.79381e-23	3
UGT2B15	4q13.2	4.46834e-13	3
UNC5B	10q22.1	1.16082e-22	3
UNC80	2q34	0.000462068	3
USP1	1p31.3	1.59361e-16	3
USP36	17q25.3	5.23338e-06	3
VANGL2	1q23.2	1.65554e-10	3
VILL	3p22.2	5.78022e-12	3
VPS13A	9q21.2	7.76403e-15	3
VPS13C	15q22.2	4.84485e-28	3
VWA3A	16p12.2	0.00267197	3
WDFY4	10q11.23	0.000305759	3
WDR17	4q34.2	1.56915e-14	3
WDR37	10p15.3	0.0341763	3
WDR81	17p13.3	0.000117927	3
XIRP1	3p22.2	2.05474e-05	3
XRN1	3q23	0.0102925	3
ZC3H13	13q14.13	6.52406e-18	3
ZCCHC2	18q21.33	0.0148561	3
ZNF106	15q15.1	1.24447e-36	3
ZNF169	9q22.32	0.00830585	3
ZNF175	19q13.41	5.20955e-37	3
ZNF407	18q23	4.40191e-10	3
ZNF438	10p11.23	8.56774e-08	3
ZNF518B	4p16.1	0.00380542	3
ZNF526	19q13.31	2.12259e-09	3
ZNF613	19q13.41	0.00314431	3
ZNF780A	19q13.2	3.66029e-07	3
ZNF99	19p12	0.0143031	3
ZNFX1	20q13.13	0.00579961	3
AACS	12q24.31	0.000315645	2
ABCB7	Xq13.3	4.576e-10	2
ABCB9	12q24.31	1.40513e-08	2
ABCC11	16q12.1	1.33271e-06	2
ABCC1	16p13.11	9.63471e-09	2
ABCC5	3q27.1	2.32848e-05	2
ABCC9	12p12.1	1.20994e-28	2
ABCF3	3q27.1	4.65536e-14	2
ABCG1	21q22.3	0.00145195	2
ABCG4	11q23.3	0.00339433	2
ABHD16A	6p21.33	0.000550683	2
ABHD2	15q26.1	0.00476246	2
ABHD6	3p14.3	2.28849e-27	2
ACADSB	10q26.13	2.6195e-44	2
ACADVL	17p13.1	9.51739e-26	2
ACOX1	17q25.1	1.72536e-11	2
ACSBG2	19p13.3	1.47745e-12	2
ACSF2	17q21.33	1.22105e-25	2
ACTG1	17q25.3	2.20918e-20	2
ACVR1B	12q13.13	1.74005e-10	2
ACVR1C	2q24.1	6.90942e-36	2
ADAM33	20p13	2.24706e-71	2
ADAMTS1	21q21.3	6.88789e-32	2
ADAMTS18	16q23.1	6.62495e-18	2
ADAMTS20	12q12	0.0266175	2
ADAMTS6	5q12.3	3.79898e-05	2
ADAMTSL4	1q21.2	1.39216e-15	2
AFF1	4q21.3-q22.1	6.74312e-41	2
AFG3L1P	16q24.3	0.0010006	2
AGAP5	10q22.2	0.0113935	2
AGFG2	7q22.1	5.36868e-20	2
AGPAT9	-	3.56233e-06	2
AGTR1	3q24	3.09281e-67	2
AKAP6	14q12	3.28505e-13	2
AKAP8	19p13.12	0.00549132	2
AKR1C1	10p15.1	2.11413e-29	2
AKTIP	16q12.2	7.62891e-08	2
ALB	4q13.3	3.21904e-21	2
ALG13	Xq23	1.6211e-09	2
ALOX15	17p13.2	0.0155438	2
ALPP	2q37.1	0.000929614	2
ALS2CL	3p21.31	5.41793e-12	2
ALS2CR11	-	0.0105605	2
AMOT	Xq23	0.000169218	2
AMPH	7p14.1	1.26979e-06	2
ANAPC4	4p15.2	4.62163e-12	2
ANGPT4	20p13	3.75408e-36	2
ANKFY1	17p13.2	1.66045e-17	2
ANKRD12	18p11.22	6.64319e-14	2
ANKRD18A	9p13.1	0.0255427	2
ANKRD20A4	9q13	0.000218739	2
ANKRD28	3p25.1	0.00516237	2
ANKRD36B	2q11.2	0.0312187	2
ANKRD50	4q28.1	0.0245176	2
ANO1	11q13.3	8.2974e-16	2
ANO9	11p15.5	7.63563e-10	2
ANPEP	15q26.1	1.53924e-12	2
ANXA13	8q24.13	0.0273233	2
AP2A2	11p15.5	0.00352505	2
APAF1	12q23.1	0.0287102	2
APBA1	9q21.12	6.37117e-05	2
APBA2	15q13.1	4.69767e-27	2
APMAP	20p11.21	0.00709527	2
APOA1	11q23.3	0.00233344	2
APPBP2	17q23.2	1.0254e-20	2
ARHGAP21	10p12.1	0.00226539	2
ARHGAP29	1p22.1	4.02949e-18	2
ARHGAP30	1q23.3	1.5249e-06	2
ARHGAP31	3q13.32-q13.33	4.73705e-14	2
ARHGAP36	Xq26.1	7.66511e-14	2
ARHGAP4	Xq28	1.17454e-05	2
ARHGAP6	Xp22.2	2.5542e-35	2
ARHGEF7	13q34	9.13976e-08	2
ARL11	13q14.2	4.36559e-11	2
ARMC9	2q37.1	0.0152505	2
ARMCX4	Xq22.1	2.08153e-19	2
ASB1	2q37.3	1.05774e-32	2
ASCC3	6q16.3	3.16122e-05	2
ASF1B	19p13.12	2.48047e-75	2
ASIC3	7q36.1	3.34387e-07	2
ASPH	8q12.3	3.92535e-23	2
ATHL1	-	0.0326163	2
ATOH8	2p11.2	3.10909e-55	2
ATP10B	5q34	0.000158547	2
ATP11A	13q34	7.24425e-05	2
ATP13A5	3q29	0.000182373	2
ATP1A1	1p13.1	2.18603e-06	2
ATP1A4	1q23.2	1.01728e-10	2
ATP2B1	12q21.33	2.39142e-13	2
ATP6V1B1	2p13.3	0.00782594	2
ATP8B2	1q21.3	1.2362e-13	2
ATRN	20p13	5.28426e-06	2
AVPR1B	1q32.1	4.06745e-06	2
AWAT1	Xq13.1	0.0090802	2
AXDND1	1q25.2	0.028827	2
AZI2	3p24.1	2.4361e-07	2
B3GALT5	21q22.2	2.47925e-07	2
BAG6	6p21.33	2.91557e-20	2
BAI3	-	9.97696e-07	2
BAX	19q13.33	2.88327e-40	2
BAZ1B	7q11.23	5.25307e-12	2
BBS2	16q13	3.3215e-36	2
BBS9	7p14.3	7.16343e-13	2
BCAR1	16q23.1	2.95159e-05	2
BCAS1	20q13.2	3.87991e-13	2
BCAT1	12p12.1	6.80428e-09	2
BCCIP	10q26.2	9.07241e-11	2
BCKDHA	19q13.2	0.00473741	2
BCL9	1q21.2	3.6721e-16	2
BEND6	6p12.1	5.58673e-13	2
BICC1	10q21.1	2.67436e-21	2
BID	22q11.21	7.44688e-22	2
BMP4	14q22.2	3.00464e-46	2
BMPR2	2q33.1-q33.2	9.58034e-15	2
BNC2	9p22.3-p22.2	1.38237e-12	2
BOD1L1	4p15.33	7.56317e-17	2
BPIFB4	20q11.21	0.0112473	2
BRCA2	13q13.1	3.86266e-31	2
BRD4	19p13.12	3.0669e-19	2
BRD9	5p15.33	0.00192115	2
BRPF1	3p25.3	9.34907e-06	2
BRSK2	11p15.5	1.04368e-07	2
BSDC1	1p35.1	6.88813e-06	2
BSN	3p21.31	0.00690084	2
BTBD3	20p12.2	1.59021e-05	2
BTBD7	14q32.12	8.00107e-19	2
BUB1	2q13	2.41888e-76	2
BUB1B	15q15.1	2.80192e-72	2
BUB3	10q26.13	1.54222e-13	2
C10orf2	-	8.50677e-11	2
C10orf90	10q26.2	4.44114e-07	2
C11orf16	11p15.4	0.00129507	2
C11orf49	11p11.2	0.00432537	2
C14orf37	-	9.3199e-08	2
C1QTNF9	13q12.12	5.29887e-52	2
C3	19p13.3	9.77767e-08	2
C3orf62	3p21.31	1.62771e-07	2
C4orf50	4p16.2-p16.1	6.60616e-08	2
C5orf42	-	4.77446e-05	2
C5orf60	5q35.3	0.0422292	2
C6orf183	-	0.000357348	2
C6orf89	6p21.2	1.54729e-10	2
C7	5p13.1	3.33094e-30	2
C9orf131	9p13.3	0.0435169	2
C9orf135	9q21.12	0.0183035	2
CACHD1	1p31.3	4.348e-47	2
CACNA1I	22q13.1	0.0036335	2
CACNA2D1	7q21.11	3.46038e-36	2
CACNA2D3	3p21.1-p14.3	0.00149463	2
CADM4	19q13.31	2.64046e-06	2
CALB2	16q22.2	0.00293834	2
CAMK1G	1q32.2	7.2321e-07	2
CAMK2D	4q26	1.13653e-10	2
CAMTA1	1p36.31-p36.23	0.00146844	2
CAP1	1p34.2	8.58178e-08	2
CAPN1	11q13.1	3.42921e-09	2
CAPN12	19q13.2	1.00579e-05	2
CARD14	17q25.3	0.00657635	2
CARD6	5p13.1	4.74773e-11	2
CARD8	19q13.33	1.02293e-21	2
CARS	11p15.4	2.79648e-15	2
CASC5	-	4.34396e-58	2
CASK	Xp11.4	0.000171976	2
CASQ1	1q23.2	5.53653e-05	2
CASQ2	1p13.1	1.89603e-35	2
CATSPER2	15q15.3	1.00688e-19	2
CBLC	19q13.32	1.33627e-07	2
CBX4	17q25.3	8.69023e-18	2
CCAR1	10q21.3	9.88669e-12	2
CCDC120	Xp11.23	5.16957e-05	2
CCDC130	19p13.13	0.000824894	2
CCDC132	-	2.2969e-08	2
CCDC150	2q33.1	6.7359e-33	2
CCDC155	19q13.33	0.00156606	2
CCDC158	4q21.1	7.0276e-59	2
CCDC170	6q25.1	4.69861e-67	2
CCDC178	18q12.1	1.21338e-40	2
CCDC27	1p36.32	6.41208e-05	2
CCDC3	10p13	3.78283e-26	2
CCDC40	17q25.3	6.14164e-05	2
CCNB3	Xp11.22	0.00135069	2
CCNE2	8q22.1	1.37332e-31	2
CCNT1	12q13.11-q13.12	8.05252e-10	2
CCS	11q13.2	6.69775e-05	2
CDH10	5p14.2-p14.1	0.0273881	2
CDHR1	10q23.1	0.000981723	2
CDHR2	5q35.2	5.21754e-14	2
CDK5RAP1	20q11.21	6.5896e-08	2
CDK5RAP2	9q33.2	0.00682807	2
CDR2	16p12.2	1.67583e-13	2
CDRT1	17p12	0.000559752	2
CELF4	18q12.2	6.03274e-10	2
CELSR1	22q13.31	0.0172692	2
CENPF	1q41	2.18894e-73	2
CEP152	15q21.1	0.000310415	2
CEP250	20q11.22	1.2575e-17	2
CEP290	12q21.32	3.50622e-12	2
CEP41	7q32.2	0.00877835	2
CEP85	1p36.11	2.83018e-22	2
CHD4	12p13.31	2.02602e-12	2
CHD5	1p36.31	0.00274313	2
CHD7	8q12.2	8.03623e-15	2
CHM	Xq21.2	1.04636e-15	2
CHORDC1	11q14.3	2.77943e-15	2
CHRM3	1q43	1.12346e-10	2
CHST15	10q26.13	9.33842e-05	2
CIITA	16p13.13	0.00805902	2
CILP	15q22.31	4.23986e-09	2
CIT	12q24.23	1.1083e-52	2
CLASP1	2q14.2-q14.3	3.89997e-05	2
CLCA2	1p22.3	2.6983e-05	2
CLCN3	4q33	1.6187e-10	2
CLCN6	1p36.22	1.33574e-42	2
CLCNKA	1p36.13	1.37749e-14	2
CLDN10	13q32.1	0.0321274	2
CLDN18	3q22.3	3.6566e-06	2
CLIP1	12q24.31	3.50504e-11	2
CLOCK	4q12	0.00278094	2
CLSTN2	3q23	8.87665e-51	2
CLSTN3	12p13.31	1.18409e-10	2
CLTC	17q23.1	0.00636956	2
CLUAP1	16p13.3	7.00383e-05	2
CMTR2	16q22.2	0.00360881	2
CNBD2	20q11.23	0.00795208	2
CNKSR2	Xp22.12	0.000545791	2
CNOT3	19q13.42	1.59242e-23	2
CNTN3	3p12.3	4.96007e-17	2
COG3	13q14.13	1.45673e-10	2
COL12A1	6q13-q14.1	0.00310632	2
COL16A1	1p35.2	0.0184962	2
COL21A1	6p12.1	8.29573e-06	2
COL22A1	8q24.23-q24.3	3.6425e-20	2
COL25A1	4q25	1.80117e-13	2
COL27A1	9q32	3.79621e-06	2
COL3A1	2q32.2	6.44958e-05	2
COL5A2	2q32.2	6.55591e-11	2
COL9A1	6q13	8.0881e-06	2
COPG1	3q21.3	5.59369e-31	2
COX15	10q24.2	3.59298e-21	2
CP	3q24-q25.1	0.00089025	2
CPA1	7q32.2	1.94523e-35	2
CPED1	7q31.31	1.08232e-44	2
CPSF2	14q32.12	3.13389e-06	2
CPXM2	10q26.13	1.23731e-16	2
CRAT	9q34.11	1.76212e-10	2
CRELD1	3p25.3	7.34919e-06	2
CRIP1	14q32.33	1.55512e-07	2
CRIPAK	4p16.3	5.69707e-15	2
CRTC1	19p13.11	0.00308012	2
CRY2	11p11.2	5.86716e-73	2
CSNK1E	22q13.1	0.00272531	2
CTNNA2	2p12	0.0345569	2
CTNNA3	10q21.3	1.09603e-05	2
CTNNBL1	20q11.23	5.83222e-09	2
CTR9	11p15.4	4.43746e-09	2
CTTNBP2	7q31.31	6.63328e-36	2
CUL2	10p11.21	2.66924e-09	2
CUL5	11q22.3	4.49909e-06	2
CYB5R1	1q32.1	5.33691e-06	2
CYLD	16q12.1	0.00808197	2
CYP2D6	22q13.2	0.0184259	2
CYP2S1	19q13.2	9.392e-09	2
CYP2W1	7p22.3	0.0226918	2
CYP3A4	7q22.1	5.23894e-18	2
CYP3A5	7q22.1	2.2078e-14	2
CYSLTR1	Xq21.1	1.0819e-12	2
CYTH3	7p22.1	2.41818e-12	2
CYTIP	2q24.1	3.94088e-05	2
DAAM1	14q23.1	1.79337e-18	2
DAAM2	6p21.2	1.32784e-29	2
DCAF13	8q22.3	3.26315e-50	2
DCST2	1q21.3	0.0205898	2
DDB1	11q12.2	2.93666e-05	2
DDX39A	19p13.12	4.37982e-58	2
DDX3X	Xp11.4	9.03335e-18	2
DDX42	17q23.3	0.00177447	2
DDX47	12p13.1	0.00478211	2
DDX50	10q22.1	0.000178431	2
DENND1A	9q33.3	0.0323383	2
DENND4C	9p22.1	3.014e-25	2
DEPDC5	22q12.2-q12.3	0.0379826	2
DGCR14	-	3.01634e-14	2
DGKH	13q14.11	0.00820193	2
DHX34	19q13.32	1.18205e-22	2
DIAPH3	13q21.2	2.5357e-49	2
DKC1	Xq28	5.81818e-38	2
DKK3	11p15.3	1.12055e-30	2
DLG2	11q14.1	4.39963e-15	2
DLGAP1	18p11.31	0.000183315	2
DLGAP4	20q11.23	8.53272e-16	2
DLGAP5	14q22.3	5.43592e-77	2
DNAI1	9p13.3	0.0112899	2
DNAJC5B	8q13.1	1.24527e-08	2
DNMBP	10q24.2	1.78013e-40	2
DNTTIP2	1p22.1	0.000550659	2
DOCK2	5q35.1	0.0111461	2
DOCK6	19p13.2	7.04945e-18	2
DOT1L	19p13.3	6.68994e-16	2
DPH2	1p34.1	1.91214e-32	2
DPP6	7q36.2	2.94901e-10	2
DPYSL5	2p23.3	1.99222e-05	2
DROSHA	5p13.3	0.000145273	2
DSEL	18q22.1	2.05227e-40	2
DSP	6p24.3	6.65749e-05	2
DTX1	12q24.13	3.09007e-28	2
DTX2	7q11.23	3.20843e-21	2
DYRK4	12p13.32	8.46659e-08	2
DZIP1L	3q22.3	3.76519e-11	2
DZIP3	3q13.13	2.46536e-19	2
E4F1	16p13.3	8.83329e-09	2
EDNRB	13q22.3	5.38285e-53	2
EEA1	12q22	6.66875e-24	2
EEF1A1	6q13	4.73283e-13	2
EGR1	5q31.2	2.3362e-45	2
EHD1	11q13.1	3.34777e-11	2
EIF2D	1q32.1	0.000986986	2
EIF3A	10q26.11	0.008459	2
EIF3I	1p35.2	7.94987e-07	2
EIF4A1	17p13.1	3.6665e-07	2
ELF2	4q31.1	7.95045e-12	2
ELK1	Xp11.23	5.71459e-30	2
ELL2	5q15	4.81518e-18	2
ELN	7q11.23	0.00657218	2
EMR1	-	5.8521e-06	2
EMR2	-	2.47303e-06	2
ENAH	1q42.12	8.69219e-16	2
ENPP7	17q25.3	0.0393239	2
EPC1	10p11.22	1.81518e-06	2
EPHB2	1p36.12	3.11122e-18	2
EPHB4	7q22.1	2.28448e-08	2
EPPK1	8q24.3	0.00169891	2
ERVW-1	7q21.2	0.00688197	2
ESAM	11q24.2	4.10374e-29	2
ESPL1	12q13.13	6.93548e-58	2
ESRP1	8q22.1	5.48264e-25	2
ESRRG	1q41	0.0037351	2
ETS2	21q22.2	3.73155e-22	2
ETV1	7p21.2	1.47353e-15	2
ETV6	12p13.2	1.93614e-05	2
EVC2	4p16.2	1.36344e-12	2
EVPL	17q25.1	6.4925e-18	2
EXOC1	4q12	2.22362e-11	2
EXOC6	10q23.33	1.89345e-12	2
EXT1	8q24.11	2.32839e-05	2
EZH2	7q36.1	2.74354e-68	2
F10	13q34	1.82362e-43	2
F8	Xq28	8.81456e-50	2
FAAH	1p33	0.00106813	2
FAM115A	-	2.78409e-11	2
FAM122B	Xq26.3	0.0125597	2
FAM124A	13q14.3	0.000349524	2
FAM129C	19p13.11	0.000169734	2
FAM138B	2q14.1	1.30747e-06	2
FAM13C	10q21.1	2.02884e-61	2
FAM173B	5p15.2	0.0123713	2
FAM179B	-	3.63532e-27	2
FAM193B	5q35.3	0.000928688	2
FAM205A	9p13.3	0.00114345	2
FAM208A	3p14.3	5.02938e-11	2
FAM208B	10p15.1	8.23046e-14	2
FAM46D	Xq21.1	0.00181249	2
FAM65A	-	8.38293e-14	2
FAM73B	-	0.00122751	2
FAM83A	8q24.13	5.902e-06	2
FANCB	Xp22.2	4.42219e-34	2
FANCF	11p14.3	1.10183e-10	2
FANCG	9p13.3	1.31195e-28	2
FANCM	14q21.2	8.85211e-06	2
FARSB	2q36.1	3.15099e-22	2
FASN	17q25.3	2.60557e-07	2
FASTKD1	2q31.1	1.90636e-08	2
FAT2	5q33.1	1.55632e-17	2
FAT4	4q28.1	1.81514e-34	2
FBN1	15q21.1	3.12305e-09	2
FBN3	19p13.2	1.53374e-14	2
FBXL13	7q22.1	0.000947032	2
FBXL18	7p22.1	0.00109678	2
FBXL7	5p15.1	2.64296e-26	2
FBXO11	2p16.3	0.00103428	2
FBXO18	-	5.03563e-05	2
FBXW10	17p11.2	0.000177848	2
FCGR1A	1q21.2	3.19004e-23	2
FCGRT	19q13.33	4.97329e-24	2
FCRL5	1q23.1	9.60304e-05	2
FER	5q21.3	3.40942e-35	2
FGD1	Xp11.22	2.74192e-20	2
FHL3	1p34.3	2.76626e-06	2
FIG4	6q21	0.0478813	2
FKBPL	6p21.32	2.35878e-34	2
FLNB	3p14.3	0.0390462	2
FLVCR1	1q32.3	3.83021e-29	2
FMN1	15q13.3	2.67589e-12	2
FMNL1	17q21.31	3.38703e-05	2
FMO1	1q24.3	7.55347e-06	2
FMO4	1q24.3	3.44709e-11	2
FN1	2q35	4.4051e-33	2
FN3KRP	17q25.3	1.71339e-06	2
FNDC7	1p13.3	0.0263148	2
FOXM1	12p13.33	3.63764e-74	2
FRG1B	-	9.05333e-10	2
FRMPD1	9p13.2	5.23078e-17	2
FRY	13q13.1	2.47149e-59	2
FSIP1	15q14	2.40339e-18	2
FXR1	3q26.33	0.000840471	2
FYB	-	0.000250435	2
GAA	17q25.3	2.50533e-08	2
GABRG1	4p12	3.23358e-09	2
GALNT5	2q24.1	0.0131342	2
GAREML	-	9.62647e-08	2
GAS2L3	12q23.1	6.44014e-41	2
GATM	15q21.1	2.52591e-28	2
GCAT	22q13.1	2.00706e-16	2
GCGR	17q25.3	5.16897e-05	2
GDAP1	8q21.11	0.000767415	2
GDF3	12p13.31	0.000497083	2
GDI1	Xq28	7.46816e-12	2
GDPD5	11q13.4-q13.5	1.59747e-07	2
GFI1	1p22.1	1.68582e-06	2
GFRAL	6p12.1	2.21071e-09	2
GHRHR	7p14.3	0.00747929	2
GIMAP8	7q36.1	1.85397e-39	2
GLDC	9p24.1	8.28227e-11	2
GLUL	1q25.3	5.2196e-17	2
GMEB1	1p35.3	0.00377885	2
GNE	9p13.3	1.91809e-10	2
GNL2	1p34.3	1.67839e-28	2
GNPAT	1q42.2	2.31978e-14	2
GOLGA3	12q24.33	1.49217e-06	2
GOLGA4	3p22.2	0.000700779	2
GPATCH1	19q13.11	0.00248682	2
GPATCH2	1q41	5.30585e-06	2
GPATCH4	1q22-q23.1	5.29393e-24	2
GPC2	7q22.1	1.32747e-22	2
GPI	19q13.11	9.23469e-24	2
GPR108	19p13.3	0.00199676	2
GPR111	-	1.31231e-05	2
GPR116	-	3.25394e-45	2
GPR133	-	1.57332e-28	2
GPR55	2q37.1	9.04828e-06	2
GPSM2	1p13.3	2.28756e-42	2
GRHL2	8q22.3	5.07715e-08	2
GRIA1	5q33.2	2.06537e-24	2
GRIK3	1p34.3	6.23329e-19	2
GRM8	7q31.33	1.22035e-06	2
GSE1	16q24.1	3.64195e-13	2
GSPT2	Xp11.22	2.95589e-18	2
GTF2IRD2	7q11.23	2.00613e-31	2
GTF3C1	16p12.1	6.23255e-12	2
GTF3C2	2p23.3	7.85125e-23	2
GUCY2D	17p13.1	8.08292e-05	2
GYS2	12p12.1	1.38866e-10	2
HBP1	7q22.3	2.31043e-30	2
HCAR2	12q24.31	1.18487e-33	2
HCAR3	12q24.31	3.85781e-36	2
HCP5	6p21.33	0.00157254	2
HECTD4	12q24.13	4.72911e-14	2
HELQ	4q21.23	1.05765e-28	2
HILPDA	7q32.1	2.59373e-09	2
HIPK2	7q34	7.2555e-15	2
HIST1H2BC	6p22.2	6.39614e-13	2
HIVEP3	1p34.2	1.34304e-06	2
HKR1	19q13.12	0.00800092	2
HLA-A	6p22.1	2.71986e-17	2
HLA-DRB1	6p21.32	4.92504e-05	2
HLA-F	6p22.1	5.29346e-13	2
HLF	17q22	1.89283e-65	2
HMBS	11q23.3	1.02092e-29	2
HMHA1	-	0.000572523	2
HNRNPH2	Xq22.1	3.50784e-11	2
HOMER2	15q25.2	0.00183139	2
HOMEZ	14q11.2	0.00298746	2
HOOK1	1p32.1	0.00266795	2
HOOK2	19p13.13	2.77115e-10	2
HOXA7	7p15.2	3.51597e-31	2
HOXB13	17q21.32	2.86008e-15	2
HOXB3	17q21.32	1.40526e-12	2
HOXD13	2q31.1	9.26308e-06	2
HPSE	4q21.23	3.03374e-15	2
HRAS	11p15.5	8.8928e-09	2
HSD17B7	1q23.3	1.10032e-15	2
HSD3B1	1p12	0.0103027	2
HSP90AB1	6p21.1	2.56531e-21	2
HSPA4	5q31.1	0.00222026	2
HSPBAP1	3q21.1	6.43155e-05	2
HTATSF1	Xq26.3	1.87446e-08	2
IARS2	1q41	0.0363597	2
IDI1	10p15.3	0.00103884	2
IFI44	1p31.1	5.61483e-13	2
IFNAR2	21q22.11	4.2857e-09	2
IFNL1	19q13.2	2.16621e-07	2
IFT140	16p13.3	7.6835e-05	2
IGDCC3	15q22.31	1.63109e-14	2
IGDCC4	15q22.31	0.00396454	2
IGHE	14q32.33	3.746e-05	2
IGKV1D-42	2p11.2	0.0310581	2
IGSF21	1p36.13	0.00016466	2
IGSF3	1p13.1	1.79491e-09	2
IGSF8	1q23.2	3.03602e-11	2
IGSF9	1q23.2	1.00024e-27	2
IGSF9B	11q25	1.22928e-15	2
IL11RA	9p13.3	3.04947e-48	2
IL1RAPL1	Xp21.3-p21.2	3.58636e-05	2
IL1RAPL2	Xq22.3	2.11508e-08	2
IL6R	1q21.3	1.58062e-08	2
ILF2	1q21.3	5.2513e-50	2
ILF3	19p13.2	3.2424e-23	2
INCENP	11q12.3	5.33685e-39	2
INHA	2q35	8.75727e-05	2
INPP4B	4q31.21	6.56976e-35	2
INPP5A	10q26.3	1.00257e-22	2
INTS2	17q23.2	0.0373968	2
INTS8	8q22.1	1.20024e-35	2
IP6K1	3p21.31	9.9427e-10	2
IPO13	1p34.1	4.12024e-21	2
IPO4	14q12	9.99387e-14	2
IQGAP1	15q26.1	0.0132263	2
IQSEC1	3p25.2	2.39819e-28	2
IQSEC3	12p13.33	4.04714e-19	2
ITGA10	1q21.1	0.0238425	2
ITGAM	16p11.2	0.0356242	2
ITIH5	10p14	7.19118e-66	2
ITLN2	1q23.3	0.00334415	2
ITPR1	3p26.1	9.36617e-49	2
ITSN1	21q22.11	9.37784e-30	2
IWS1	2q14.3	2.52287e-09	2
JAG2	14q32.33	2.45039e-05	2
JAKMIP1	4p16.1	1.00532e-18	2
JMJD1C	10q21.3	3.11727e-14	2
KAT6A	8p11.21	0.000213505	2
KAT8	16p11.2	0.00428294	2
KATNAL1	13q12.3	2.63269e-30	2
KBTBD6	13q14.11	1.86537e-06	2
KCNA5	12p13.32	0.0417397	2
KCND1	Xp11.23	0.00967428	2
KCND2	7q31.31	4.9017e-11	2
KCNG1	20q13.13	1.53509e-23	2
KCNH3	12q13.12	1.89833e-07	2
KCNN3	1q21.3	0.00514641	2
KCTD3	1q41	6.71632e-08	2
KDM2B	12q24.31	2.4883e-20	2
KDM4E	11q21	0.0282624	2
KDM5B	1q32.1	1.01922e-16	2
KHSRP	19p13.3	2.18829e-28	2
KIAA0226	-	2.40552e-07	2
KIAA0368	-	7.3096e-09	2
KIAA1191	5q35.2	3.03233e-06	2
KIAA1211	4q12	1.97647e-14	2
KIAA1211L	2q11.2	1.0897e-05	2
KIAA1257	3q21.3	0.0185431	2
KIAA1324L	7q21.12	1.26364e-25	2
KIAA1328	18q12.2	3.03774e-20	2
KIAA1683	-	1.80453e-39	2
KIAA1755	20q11.23	0.000437554	2
KIAA2018	-	4.3064e-12	2
KIAA2026	9p24.1	3.63931e-06	2
KIDINS220	2p25.1	1.49638e-11	2
KIF15	3p21.31	5.9736e-62	2
KIF26A	14q32.33	1.25408e-18	2
KIRREL	-	8.59112e-19	2
KIRREL2	19q13.12	3.08212e-07	2
KLC2	11q13.2	1.89438e-21	2
KLHDC3	6p21.1	5.77863e-20	2
KLHL26	19p13.11	4.02669e-05	2
KLHL31	6p12.1	5.01205e-27	2
KLHL38	8q24.13	2.44987e-09	2
KMT2A	11q23.3	4.51169e-15	2
KMT2B	19q13.12	2.01113e-12	2
KMT2E	7q22.3	2.66261e-10	2
KNSTRN	15q15.1	2.09227e-48	2
KRT14	17q21.2	1.21867e-10	2
KRT85	12q13.13	0.0031097	2
L3MBTL1	20q13.12	1.0905e-12	2
LAMA4	6q21	3.92136e-18	2
LAMA5	20q13.33	0.0394921	2
LAMC1	1q25.3	2.16604e-17	2
LAMC2	1q25.3	0.0181168	2
LARGE	-	2.365e-06	2
LARP4B	10p15.3	2.99437e-23	2
LARP7	4q25	7.82928e-05	2
LCA5	6q14.1	6.73666e-46	2
LCA5L	21q22.2	0.0364878	2
LCMT2	15q15.3	2.34985e-12	2
LEMD2	6p21.31	7.27333e-25	2
LEPR	1p31.3	9.0374e-62	2
LETMD1	12q13.12	9.50445e-47	2
LGALS12	11q12.3	6.75908e-37	2
LGALS3BP	17q25	0.0419049	2
LGR6	1q32.1	0.00474272	2
LILRA2	19q13.4	0.000850471	2
LILRA4	19q13.42	0.00242564	2
LILRB3	19q13.42	0.0042517	2
LILRB5	19q13.4	4.19731e-16	2
LIMCH1	4p13	1.77935e-25	2
LIMK2	22q12.2	0.0215107	2
LMAN1	18q21.32	0.00701234	2
LMOD1	1q32.1	9.47416e-72	2
LNX1	4q12	2.719e-10	2
LOXL3	2p13.1	3.20175e-08	2
LPCAT4	15q14	1.22631e-06	2
LPIN3	20q12	1.50802e-08	2
LRBA	4q31.3	2.86659e-09	2
LRFN2	6p21.2-p21.1	0.0207934	2
LRIG1	3p14.1	7.37032e-51	2
LRP5	11q13.2	6.465e-06	2
LRP8	1p32.3	1.2646e-47	2
LRRC27	10q26.3	0.000567784	2
LRRC48	-	8.05981e-19	2
LRRC4B	19q13.33	0.000694237	2
LRRC4C	11p12	3.45435e-10	2
LRRCC1	8q21.2	1.28381e-14	2
LRRFIP1	2q37.3	5.00974e-08	2
LRRIQ1	12q21.31	2.12454e-06	2
LRRN2	1q32.1	0.00032242	2
LSR	19q13.12	3.28729e-36	2
LTBP1	2p22.3	5.90547e-06	2
LUZP1	1p36.12	1.52394e-14	2
MAATS1	3q13.33	1.07331e-16	2
MAGEA11	Xq28	0.00943986	2
MAGEA12	Xq28	0.00029676	2
MAGEB4	Xp21.2	2.02757e-07	2
MAGED1	Xp11.22	7.07573e-31	2
MAGEE1	Xq13.3	2.50009e-06	2
MALRD1	10p12.31	1.49768e-19	2
MALSU1	7p15.3	5.21859e-12	2
MAN2A2	15q25	1.26154e-13	2
MAN2C1	15q24.2	6.07664e-17	2
MAP10	1q42.2	5.84146e-06	2
MAP3K5	6q23.3	4.67155e-14	2
MAP4K1	19q13.1-q13.4	4.40283e-15	2
MAPK4	18q21.1-q21.2	6.60762e-06	2
MAPK8IP2	22q13.33	3.81308e-10	2
MAPKBP1	15q15.1	1.79752e-25	2
MARS	12q13.3	5.34396e-36	2
MASP2	1p36.22	3.38925e-23	2
MBNL3	Xq26.2	1.38435e-07	2
MBOAT7	19q13.42	7.46752e-22	2
MCM2	3q21.3	2.06648e-51	2
MCM3	6p12.2	3.46682e-40	2
MDGA1	6p21.2	0.0182605	2
MDGA2	14q21.3	1.68292e-12	2
MED1	17q12	0.00264031	2
MED13	17q23.2	0.00184556	2
MED15	22q11.21	4.78915e-07	2
MFN1	3q26.33	0.00231626	2
MFSD3	8q24.3	5.46803e-20	2
MFSD4	-	0.00578028	2
MGAM	7q34	0.00343723	2
MGAT5B	17q25.2	3.14572e-07	2
MICAL1	6q21	6.22337e-10	2
MICAL2	11p15.3	1.16158e-16	2
MICALL1	22q13.1	9.73954e-12	2
MID2	Xq22.3	1.33558e-18	2
MIPEP	13q12.12	0.00369727	2
MKI67	10q26.2	9.1766e-68	2
MLC1	22q13.33	5.35072e-05	2
MLLT4	-	0.0308263	2
MLYCD	16q23.3	2.42667e-30	2
MMD	17q22	8.46423e-25	2
MMP21	10q26.2	2.05424e-06	2
MMS22L	6q16.1	4.3721e-16	2
MN1	22q12.1	7.49433e-06	2
MPDZ	9p23	4.80321e-28	2
MPHOSPH9	12q24.31	5.11634e-08	2
MPP7	10p12.1	2.83194e-27	2
MRPL45P2	17q21.32	7.68626e-10	2
MRPS2	9q34.3	0.000132171	2
MRVI1	11p15.4	3.02202e-38	2
MSH6	2p16.3	2.67578e-23	2
MSL3	Xp22.2	3.64936e-20	2
MTIF2	2p16.1	1.30525e-14	2
MTM1	Xq28	0.000309412	2
MTMR14	3p25.3	0.000681102	2
MTMR3	22q12.2	4.9235e-29	2
MTMR4	17q22	0.000961471	2
MT-ND6	mitochondria	1.61111e-11	2
MTR	1q43	0.000178808	2
MUC7	4q13.3	0.0212659	2
MX1	21q22.3	1.89527e-11	2
MX2	21q22.3	8.88893e-10	2
MYBL2	20q13.12	3.98233e-81	2
MYCBP2	13q22.3	1.13662e-28	2
MYCBPAP	17q21.33	8.07216e-05	2
MYH15	3q13.13	0.0014734	2
MYLK2	20q11.21	0.0433988	2
MYLK	3q21.1	1.83467e-32	2
MYO1F	19p13.2	4.44852e-05	2
MYO3A	10p12.1	0.00300988	2
MYO5B	18q	0.000632961	2
MYO5C	15q21.2	5.09197e-23	2
MYO7B	2q14.3	0.0272401	2
MYO9B	19p13.11	4.96342e-18	2
NAA15	4q31.1	4.04611e-11	2
NAALAD2	11q14.3	8.79831e-27	2
NANOS3	19p13.13	1.03564e-07	2
NAP1L2	Xq13.2	1.84583e-42	2
NCAPD3	11q25	1.15877e-16	2
NCAPH2	22q13.33	8.13521e-17	2
NCCRP1	19q13.2	1.20088e-11	2
NCL	2q37.1	1.02398e-22	2
NCOA1	2p23.3	1.31974e-19	2
NDRG1	8q24.22	0.00117082	2
NDUFS2	1q23.3	1.09846e-26	2
NEDD9	6p24.2	5.50483e-30	2
NEK4	3p21.1	0.0023108	2
NET1	10p15.1	3.61167e-06	2
NEXN	1p31.1	1.70237e-35	2
NFASC	1q32.1	6.42099e-06	2
NFATC4	14q12	3.13229e-06	2
NFKB2	10q24.32	6.94579e-17	2
NHSL2	Xq13.1	1.96237e-27	2
NISCH	3p21.1	1.44999e-30	2
NKX2-5	5q34	6.748e-15	2
NLGN3	Xq13.1	3.81984e-12	2
NLRC5	16q13	9.03656e-11	2
NLRP5	19q13.43	3.21092e-11	2
NOMO1	16p13.11	6.7584e-18	2
NOP2	12p13.31	2.39055e-39	2
NOP56	20p13	6.63328e-36	2
NOTCH4	6p21.32	1.089e-47	2
NPAS2	2q11.2	2.40397e-05	2
NPAS4	11q13.2	2.58065e-09	2
NPAT	11q22.3	0.030431	2
NPL	1q25.3	7.71819e-09	2
NPR3	5p13.3	0.00141823	2
NRBP1	2p23.3	6.34487e-19	2
NRK	Xq22.3	4.67873e-06	2
NRROS	3q29	0.0235185	2
NRXN3	14q24.3-q31.1	9.00221e-12	2
NT5DC3	12q23.3	0.00277677	2
NTMT1	9q34.11	3.51461e-18	2
NTNG2	9q34.13	2.24654e-11	2
NTRK3	15q25.3	1.256e-06	2
NUF2	1q23.3	1.09752e-78	2
NUMA1	11q13.4	1.88379e-15	2
NUP160	11p11.2	9.49053e-07	2
NUP205	7q33	2.6291e-20	2
NUP210L	1q21.3	0.0144764	2
NUPL2	7p15.3	2.28532e-09	2
NVL	1q42.11	1.5358e-25	2
OCSTAMP	20q13.12	0.0192813	2
OGFOD1	16q13	3.82078e-08	2
OR10H1	19p13.1	0.00150443	2
OR10Q1	11q12.1	0.0441994	2
OTUD7B	1q21.2	0.00517777	2
P2RX2	12q24.33	0.00742452	2
P2RY2	11q13.4	0.0192458	2
PABPC1	8q22.3	2.86451e-22	2
PABPC3	13q12.13	2.87251e-08	2
PABPC4	1p34.3	1.33101e-15	2
PABPN1L	16q24.3	0.031286	2
PADI2	1p36.13	9.46153e-08	2
PAN2	12q13.3	3.15413e-22	2
PANX2	22q13.33	2.4948e-22	2
PAQR8	6p12.2	0.000132959	2
PARP15	3q21.1	0.0463129	2
PARP8	5q11.1	1.10284e-11	2
PAX5	9p13.2	1.85303e-06	2
PAX7	1p36.13	0.0047741	2
PC	11q13.2	2.54713e-11	2
PCDH1	5q31.3	1.12661e-07	2
PCDHB11	5q31.3	2.14738e-12	2
PCDHB14	5q31.3	2.38301e-07	2
PCDHB7	5q31.3	1.55645e-09	2
PCDHGA4	5q31	5.16681e-21	2
PCDHGA7	5q31	2.08647e-17	2
PCDHGB1	5q31	0.00061033	2
PCDHGB7	5q31.3	2.99142e-62	2
PCF11	11q14.1	1.46666e-16	2
PCNT	21q22.3	2.52633e-09	2
PCNX	-	2.19293e-40	2
PCSK5	9q21.13	8.71925e-31	2
PCSK7	11q23.3	4.21303e-15	2
PDE3B	11p15.2	4.36249e-20	2
PDE6C	10q23.33	0.000247918	2
PDGFRA	4q12	1.5289e-25	2
PDPR	16q22.1	1.35131e-07	2
PDXDC1	16p13.11	1.95211e-09	2
PDZD4	Xq28	4.84876e-10	2
PDZD7	10q24.31	3.75454e-05	2
PDZRN4	12q12	7.06059e-25	2
PEAK1	15q24.3	4.28426e-20	2
PEX1	7q21.2	2.15109e-06	2
PFKP	10p15.2	7.9044e-24	2
PGAP2	11p15.4	9.14556e-05	2
PGS1	17q25.3	1.46529e-05	2
PHACTR4	1p35.3	0.0385685	2
PHEX	Xp22.11	0.000455943	2
PHLDB2	3q13.2	1.84074e-32	2
PHLDB3	19q13.31	0.0248789	2
PHRF1	11p15.5	0.0439596	2
PHYKPL	5q35.3	7.61808e-26	2
PI16	6p21.2	1.37786e-45	2
PI4KA	22q11.21	0.0269498	2
PIGM	1q23.2	8.00787e-09	2
PIK3R1	5q13.1	6.96904e-39	2
PIKFYVE	2q34	3.55369e-13	2
PINK1	1p36.12	2.32781e-29	2
PIP5K1A	1q21.3	1.01285e-16	2
PIWIL2	8p21.3	8.20074e-15	2
PJA2	5q21.3	7.45614e-46	2
PLCD4	2q35	3.50712e-16	2
PLCL2	3p24.3	2.77987e-11	2
PLD1	3q26.31	1.38837e-10	2
PLEKHA5	12p12.3	0.000452335	2
PLEKHG4B	5p15.33	3.71634e-15	2
PLEKHH2	2p21	1.74924e-35	2
PLIN5	19p13.3	1.60232e-33	2
PLOD2	3q24	6.28963e-05	2
PM20D1	1q32.1	2.04839e-07	2
PMP22	17p12	3.83871e-19	2
PNPLA1	6p21.31	2.71854e-13	2
PODN	1p32.3	1.71859e-31	2
POLD1	19q13.3	3.089e-34	2
POLE	12q24.33	6.47069e-19	2
POLQ	3q13.33	5.1798e-54	2
POLR1B	2q14.1	1.09467e-10	2
POLR2A	17p13.1	3.41829e-05	2
POLR2J4	7p13	8.95152e-13	2
POLR3A	10q22.3	0.00431715	2
POLR3D	8p21.3	2.23285e-07	2
POPDC2	3q13.33	2.78116e-10	2
POSTN	13q13.3	1.46739e-09	2
POU2F2	19q13.2	2.79232e-06	2
PPFIBP1	12p11.23-p11.22	1.7394e-13	2
PPM1B	2p21	0.000222337	2
PPM1L	3q25.33-q26.1	1.18014e-08	2
PPP1R12B	1q32.1	4.52735e-61	2
PPP1R13L	19q13.32	0.0340892	2
PPP1R9A	7q21.3	0.0422238	2
PPP2R1A	19q13.41	4.93364e-13	2
PPRC1	10q24.32	9.76863e-12	2
PRDM10	11q24.3	4.66081e-05	2
PRDM1	6q21	0.00106233	2
PRELP	1q32.1	3.97373e-20	2
PRG4	1q31.1	1.60886e-10	2
PRKAR2A	3p21.31	2.2198e-07	2
PRKCA	17q24.2	0.0152501	2
PRKCB	16p12.2-p12.1	0.017645	2
PRKDC	8q11.21	4.86009e-18	2
PRKG1	10q11.23-q21.1	5.16457e-24	2
PRKG2	4q21.21	8.78466e-11	2
PRLHR	10q26.11	0.0132263	2
PROM1	4p15.32	0.00126315	2
PROZ	13q34	5.19708e-05	2
PRPF3	1q21.2	7.17409e-23	2
PRPF8	17p13.3	0.00224644	2
PRR14L	22q12.2	0.00157173	2
PRSS27	16p13.3	1.467e-18	2
PRX	19q13.2	1.53628e-31	2
PSD2	5q31.2	1.63816e-14	2
PSIP1	9p22.3	0.0487262	2
PSMA5	1p13.3	1.38298e-38	2
PSME4	2p16.2	1.98384e-24	2
PTBP1	19p13.3	1.11073e-32	2
PTCH1	9q22.32	1.32609e-09	2
PTCHD3	10p12.1	3.71958e-06	2
PTK2	8q24.3	3.92617e-12	2
PTPRD	9p24.1-p23	0.0322214	2
PTPRE	10q26.2	2.49255e-18	2
PTPRN2	7q36.3	6.89635e-17	2
PTPRQ	12q21.31	6.90401e-17	2
PTPRT	20q12-q13.11	1.81356e-30	2
PUM1	1p35.2	6.09988e-06	2
PVRL2	-	9.24564e-05	2
PVRL3	-	7.79038e-22	2
PXDN	2p25.3	0.00270527	2
QSER1	11p13	0.000423021	2
RAB14	9q33.2	3.54249e-11	2
RAB1A	2p14	1.43047e-11	2
RABGGTB	1p31.1	1.28643e-07	2
RAD21L1	20p13	0.002252	2
RAD51AP2	2p24.2	0.000336628	2
RANBP2	2q13	0.00197171	2
RANBP3	19p13.3	1.50207e-07	2
RAPGEF6	5q31.1	1.06703e-05	2
RASGRF1	15q25.1	1.34911e-12	2
RASIP1	19q13.33	4.74134e-23	2
RASSF5	1q32.1	0.0297479	2
RB1	13q14.2	1.69314e-18	2
RBBP8	18q11.2	0.00351413	2
RBM17	10p15.1	1.09531e-20	2
RBM23	14q11.2	0.00751788	2
RBM27	5q32	0.000174369	2
RBM47	4p14	0.00540643	2
RBM4B	11q13	0.00028215	2
RBM6	3p21.31	6.97163e-11	2
RCC1	1p35.3	1.37749e-41	2
RCOR3	1q32.2-q32.3	1.15781e-06	2
RDH11	14q24.1	0.000115915	2
RDH5	12q13.2	2.8672e-37	2
RET	10q11.21	0.0359542	2
REV3L	6q21	4.15808e-13	2
RFWD2	-	2.29841e-27	2
RGAG1	-	2.8105e-07	2
RGS3	9q32	1.17477e-05	2
RGSL1	1q25.3	0.00564766	2
RHBG	1q22	1.22961e-06	2
RHOBTB2	8p21.3	6.64501e-14	2
RIMS2	8q22.3	1.11672e-06	2
RIN3	14q32.13	1.92104e-07	2
RIPK2	8q21.3	4.44113e-40	2
RNASE7	14q11.2	1.55017e-20	2
RNF130	5q35.3	0.0143282	2
RNF13	3q25.1	1.03471e-09	2
RNF146	6q22.33	3.96529e-10	2
RNF214	11q23.3	3.76399e-05	2
RNF26	11q23	0.00355757	2
RNF40	16p11.2	0.00188648	2
RNF43	17q23.2	0.00062308	2
RNPC3	1p21.1	6.79073e-17	2
ROS1	6q22.1	6.72679e-05	2
RPGRIP1L	16q12.2	0.000275729	2
RSPH10B	7p22.1	0.00539792	2
RTN4	2p16.1	2.96861e-24	2
RTN4RL2	11q12.1	2.63575e-13	2
RUFY2	10q21.3	1.75256e-18	2
RUFY3	4q13.3	0.00027957	2
RXRG	1q23.3	6.26475e-20	2
SALL1	16q12.1	0.0272955	2
SALL2	14q11.2	2.0979e-18	2
SAP130	2q14.3	3.58279e-07	2
SAP25	7q22.1	0.00234049	2
SATB1	3p24.3	2.06442e-13	2
SCARB2	4q21.1	2.15786e-15	2
SCLY	2q37.3	3.1483e-06	2
SCN3A	2q24.3	1.545e-23	2
SCN8A	12q13.13	0.038552	2
SCRIB	8q24.3	5.31762e-24	2
SDK1	7p22.2	2.44037e-12	2
SEC16A	9q34.3	0.0498146	2
SELL	1q24.2	3.85463e-10	2
SEMA3C	7q21.11	2.27842e-44	2
SEMA3E	7q21.11	4.06302e-22	2
SEMA4D	9q22.2	1.27359e-15	2
SEMA6A	5q23.1	1.85245e-39	2
SENP6	6q14.1	0.00397721	2
2019-09-01	16p11.2	0.00320006	2
SERPINB1	6p25.2	1.59241e-12	2
SERPINB3	18q21.33	0.000907641	2
SETD2	3p21.31	2.32862e-11	2
SF3A1	22q12.2	0.000415698	2
SF3B3	16q22.1	4.19828e-19	2
SGCD	5q33.2-q33.3	1.72538e-32	2
SGIP1	1p31.3	0.0244932	2
SGMS1	10q11.23	5.92302e-08	2
SGSM1	22q11.23	2.55726e-26	2
SH2D2A	1q23.1	8.27713e-48	2
SH3BP1	22q13.1	2.07507e-39	2
SH3GL2	9p22.2	1.88967e-05	2
SH3PXD2B	5q35.1	0.000283878	2
SHCBP1L	1q25.3	0.00217393	2
SHKBP1	19q13.2	5.29595e-21	2
SHPRH	6q24.3	4.4431e-14	2
SHROOM2	Xp22.2	8.28849e-05	2
SIGLEC9	19q13.3-q13.4	8.39281e-09	2
SIRPA	20p13	0.000139757	2
SIRPG	20p13	2.57315e-16	2
SKIDA1	10p12.31	0.000419976	2
SLC10A3	Xq28	5.97653e-17	2
SLC10A5	8q21.13	0.000387684	2
SLC1A7	1p32.3	3.70935e-25	2
SLC23A3	2q35	0.00132237	2
SLC25A10	17q25.3	6.83855e-20	2
SLC25A12	2q31.1	1.06429e-09	2
SLC26A5	7q22.1	3.08701e-12	2
SLC26A9	1q32.1	4.51097e-07	2
SLC28A2	15q21.1	0.00388898	2
SLC28A3	9q21.32-q21.33	1.39482e-07	2
SLC29A4	7p22.1	1.70794e-08	2
SLC34A1	5q35.3	0.000238745	2
SLC35D1	1p31.3	0.00228349	2
SLC37A2	11q24.2	0.00572086	2
SLC38A10	17q25.3	0.0185389	2
SLC39A12	10p12.33	0.000320033	2
SLC45A4	8q24.3	3.78981e-10	2
SLC4A11	20p13	9.40797e-05	2
SLC4A4	4q13.3	5.37317e-21	2
SLC4A8	12q13.13	4.02469e-08	2
SLC5A9	1p33	9.11486e-08	2
SLC6A8	Xq28	6.80927e-15	2
SLC8A1	2p22.1	0.000346003	2
SLC9A4	2q12.1	0.000308631	2
SLCO1C1	12p12.2	1.09044e-19	2
SLCO5A1	8q13.3	1.10912e-11	2
SLIT3	5q34-q35.1	2.37875e-56	2
SMAD5	5q31.1	8.50495e-27	2
SMARCA2	9p24.3	4.77961e-25	2
SMCR8	17p11.2	5.47965e-06	2
SMOC2	6q27	1.28813e-31	2
SMYD1	2p11.2	8.37777e-33	2
SMYD2	1q32.3	6.64975e-23	2
SNAP91	6q14.2	0.00107757	2
SNN	16p13.13	6.11036e-09	2
SNRPD2	19q13.2-q13.3	3.16698e-16	2
SNRPN	15q11.2	6.60391e-10	2
SNX32	11q13.1	0.00343908	2
SORL1	11q24.1	3.50489e-11	2
SOS1	2p22.1	3.08879e-05	2
SP1	12q13.13	1.81664e-18	2
SPAG5	17q11.2	4.42745e-67	2
SPATA17	1q41	0.00204592	2
SPEN	1p36.21-p36.13	1.06271e-08	2
SPG11	15q21.1	1.65214e-28	2
SPHKAP	2q36.3	1.0961e-08	2
SPNS2	17p13.2	0.000188266	2
SPPL2B	19p13.3	0.000462261	2
SPRED1	15q14	4.70303e-07	2
SPTAN1	9q34.11	1.25054e-09	2
SPTBN2	11q13.2	1.95782e-15	2
SPTLC1	9q22.31	0.000217427	2
SRL	16p13.3	6.42727e-09	2
SRPK1	6p21.31	4.62093e-39	2
SRPK2	7q22.3	0.0289373	2
SSH1	12q24.11	0.0221281	2
SSX2IP	1p22.3	4.34448e-29	2
STAC2	17q12	7.52873e-07	2
STAG1	3q22.3	0.00100465	2
STAG2	Xq25	8.36234e-07	2
STAG3	7q22.1	0.00916696	2
STARD7	2q11.2	6.47515e-17	2
STARD9	15q15.2	6.17196e-47	2
STAT3	17q21.2	0.00976004	2
STAT5A	17q21.2	1.6051e-29	2
STAT6	12q13	4.75269e-18	2
STAU2	8q21.11	0.00417652	2
STK11IP	2q35	1.0097e-08	2
STK31	7p15.3	0.000232433	2
STK38L	12p11.23	0.000280777	2
STRIP1	1p13.3	0.00181528	2
STX6	1q25.3	1.3149e-39	2
STXBP1	9q34.11	4.95492e-43	2
SUPV3L1	10q22.1	4.08557e-10	2
SVIL	10p11.23	2.34587e-09	2
SVOPL	7q34	0.000581036	2
SYBU	8q23.2	7.50722e-51	2
SYDE1	19p13.12	3.15109e-09	2
SYDE2	1p22.3	1.09749e-08	2
SYMPK	19q13.32	1.78327e-07	2
SYNCRIP	6q14.3	5.48422e-14	2
SYNGR4	19q13.33	1.02629e-12	2
SYNJ1	21q22.11	1.9867e-07	2
SYNPO2	4q26	2.87531e-72	2
SYT16	14q23.2	0.000969795	2
TACC2	10q26.13	1.06334e-05	2
TACC3	4p16.3	1.5808e-74	2
TAF1	Xq13.1	1.82328e-11	2
TANC1	2q24.2	1.18917e-07	2
TANGO6	16q22.1	4.46484e-22	2
TAPT1-AS1	4p15.32	1.60706e-28	2
TARBP1	1q42.2	5.70971e-14	2
TARS	5p13.3	2.29044e-28	2
TAS1R3	1p36.33	1.58991e-09	2
TBC1D13	9q34.11	2.60481e-31	2
TBC1D20	20p13	6.46204e-16	2
TBC1D2B	15q24.3-q25.1	1.45487e-15	2
TBC1D4	13q22.2	5.00479e-20	2
TBKBP1	17q21.32	3.64625e-10	2
TCEA1	8q11.23	4.66604e-08	2
TCF12	15q21.3	3.13814e-10	2
TCF7L2	10q25.2-q25.3	5.24681e-15	2
TCTN1	12q24.11	6.66262e-12	2
TDRD10	1q21.3	4.3076e-38	2
TECPR1	7q21.3	0.0027758	2
TECPR2	14q32.33	1.03095e-23	2
TEKT5	16p13.13	0.0265772	2
TELO2	16p13.3	1.0792e-12	2
TENM3	4q34.3-q35.1	1.40828e-18	2
TEPP	16q21	7.22067e-17	2
TET3	2p13.1	2.48306e-23	2
TFAP2E	1p34.3	2.09507e-07	2
TFAP4	16p13.3	8.12539e-22	2
TFPI2	7q21.3	1.62062e-20	2
TGM1	14q12	0.00102546	2
THADA	2p21	0.0172312	2
THAP7	22q11.21	4.52124e-05	2
THNSL1	10p12.1	2.23346e-07	2
THOC5	22q12.2	8.10873e-11	2
THSD7B	2q22.1	3.49954e-38	2
TIGD3	11q13.1	4.51201e-14	2
TIMM50	19q13.2	2.01207e-22	2
TJAP1	6p21.1	4.17021e-05	2
TLE4	9q21.31	2.34692e-13	2
TLR3	4q35.1	1.73849e-44	2
TMCO4	1p36.13	0.000296932	2
TMEM104	17q25.1	4.70411e-27	2
TMEM107	17p13.1	0.00462046	2
TMEM115	3p21.31	0.0178797	2
TMEM145	19q13.2	1.13939e-05	2
TMEM209	7q32.2	3.74637e-05	2
TMEM255A	Xq24	1.90686e-48	2
TMEM57	-	0.00014623	2
TMEM68	8q12.1	0.00046475	2
TNKS2	10q23.32	1.31139e-15	2
TNN	1q25.1	2.96781e-37	2
TNRC18	7p22.1	0.0424356	2
TNRC6A	16p12.1	2.67109e-15	2
TOMM40L	1q23.3	2.38651e-26	2
TOP3B	22q11.22	0.00780872	2
TOR1AIP2	1q25.2	3.36777e-19	2
TP53BP1	15q15.3	2.66851e-09	2
TP53BP2	1q41	2.36789e-21	2
TP63	3q28	3.6084e-34	2
TPSAB1	16p13.3	1.02689e-10	2
TRAF7	16p13.3	1.79009e-20	2
TRDN	6q22.31	1.64092e-12	2
TRHDE	12q21.1	7.526e-18	2
TRIM24	7q33-q34	1.08634e-09	2
TRIM41	5q35.3	0.0326836	2
TRIM6	11p15.4	5.84236e-17	2
TRIM73	7q11.23	0.00028637	2
TRIO	5p15.2	1.20052e-08	2
TRMT112	11q13.1	1.14783e-15	2
TRPC1	3q23	3.07939e-32	2
TRPM1	15q13.3	2.41194e-11	2
TRPM8	2q37.1	2.77293e-06	2
TRPV2	17p11.2	0.00822326	2
TSGA10	2q11.2	1.65502e-10	2
TSHZ2	20q13.2	7.58242e-58	2
TSHZ3	19q12	1.15282e-26	2
TSPAN12	7q31.31	3.07688e-05	2
TTC17	11p12-p11.2	0.000412278	2
TTC24	1q22	1.26743e-05	2
TTC25	17q21.2	1.04408e-12	2
TTC28	22q12.1	3.38636e-59	2
TTC38	22q13.31	1.60657e-17	2
TTC7B	14q32.11	4.75486e-08	2
TTLL7	1p31.1	0.00163612	2
TTYH1	19q13.42	0.00456159	2
TUBA3D	2q21.1	0.00318453	2
TUBE1	6q21	5.54851e-08	2
TUBGCP6	22q13.33	5.95552e-08	2
TULP4	6q25.3	1.57432e-06	2
TXNDC16	14q22.1	2.30353e-05	2
UAP1	1q23.3	8.36631e-15	2
UBAP2	9p13.3	1.97501e-16	2
UBE2Q1	1q21.3	1.9803e-38	2
UBE3B	12q24.11	1.26481e-15	2
UBE3D	6q14.1	4.6222e-07	2
UBQLN4	1q22	4.43301e-37	2
UBR4	1p36.13	0.0132416	2
UBXN2B	8q12.1	0.000431001	2
ULK3	15q24.1	2.97922e-12	2
UMODL1	21q22.3	4.81322e-12	2
UNC13A	19p13.11	3.78969e-05	2
UNC13C	15q21.3	0.00178577	2
UNC13D	17q25.3	1.32646e-21	2
UNC93A	6q27	4.03342e-06	2
UNK	17q25.3	0.0265641	2
UPF2	10p14	4.40189e-06	2
UPF3B	Xq24	2.4328e-21	2
URB2	1q42.13	5.29389e-25	2
USHBP1	19p13.11	4.30245e-49	2
USP13	3q26.33	0.0246113	2
USP33	1p31.1	3.06343e-16	2
USP39	2p11.2	3.69877e-31	2
USP5	12p13	5.4222e-21	2
USP6	17p13.2	7.67522e-08	2
UTP14A	Xq26.1	8.97366e-15	2
VAC14	16q22.1-q22.2	1.19805e-15	2
VCAN	5q14.2-q14.3	4.36063e-10	2
VCL	10q22.2	1.17016e-13	2
VEPH1	3q25.31-q25.32	2.0301e-05	2
VIT	2p22.2	4.79597e-28	2
VPS13B	8q22.2	4.0002e-05	2
VPS51	11q13.1	7.86902e-06	2
VRTN	14q24.3	0.00123915	2
VWA8	13q14.11	2.62385e-25	2
WASL	7q31.32	0.00034936	2
WBP1	2p13.1	0.00314019	2
WBSCR17	-	0.00488119	2
WBSCR28	-	4.42838e-13	2
WDPCP	2p15	3.38271e-13	2
WDR11	10q26.12	2.39886e-13	2
WDR33	2q14.3	0.01012	2
WDR6	3p21.31	0.00615124	2
WDR66	12q24.31	0.000207698	2
WDR90	16p13.3	0.000498525	2
WDR93	15q26.1	5.27028e-25	2
WDTC1	1p36.11	5.4054e-23	2
WHAMM	15q25.2	4.42183e-18	2
WHAMMP2	15q13.1	1.3642e-42	2
WHSC1	-	2.05868e-27	2
WISP2	20q13.12	2.05998e-19	2
WRAP53	17p13.1	1.84658e-13	2
WRN	8p12	7.67361e-06	2
WSCD2	12q23.3	3.02237e-23	2
XIST	Xq13.2	1.67362e-16	2
XPNPEP2	Xq26.1	1.03526e-18	2
XPO5	6p21.1	4.30447e-38	2
XPO6	16p11.2	1.19114e-28	2
YLPM1	14q24.3	6.32058e-15	2
YTHDF2	1p35.3	6.90376e-06	2
YY1AP1	1q22	1.64977e-11	2
ZAN	7q22.1	0.00942625	2
ZBBX	3q26.1	0.0446966	2
ZBTB37	1q25.1	3.80382e-07	2
ZBTB38	3q23	1.03855e-18	2
ZBTB4	17p13.1	3.55141e-72	2
ZBTB5	9p13.2	0.00044764	2
ZC3H11A	1q32.1	0.0297714	2
ZC3H7B	22q13.2	0.00013063	2
ZEB1	10p11.22	9.06074e-30	2
ZFP14	19q13.13	2.11437e-09	2
ZFYVE20	-	7.65015e-21	2
ZFYVE27	10q24.2	0.0223906	2
ZIC3	Xq26.3	0.011555	2
ZMPSTE24	1p34.2	1.1331e-07	2
ZNF143	11p15.4	0.0084467	2
ZNF17	19q13.43	2.96585e-15	2
ZNF181	19q13.11	1.08491e-12	2
ZNF205	16p13.3	8.28275e-10	2
ZNF208	19p12	5.20568e-11	2
ZNF232	17p13.2	1.71709e-05	2
ZNF235	19q13.2	0.00786392	2
ZNF236	18q22-q23	0.00481262	2
ZNF251	8q24.3	0.000164074	2
ZNF254	19p13	0.0425517	2
ZNF334	20q13.12	6.64052e-09	2
ZNF34	8q24.3	8.6207e-08	2
ZNF395	8p21.1	1.83673e-34	2
ZNF417	19q13.43	2.50559e-06	2
ZNF496	1q44	2.40263e-07	2
ZNF540	19q13.13	5.59756e-38	2
ZNF541	19q13.33	0.00262233	2
ZNF549	19q13.43	0.000173064	2
ZNF560	19p13.2	0.0053096	2
ZNF587	19q13.43	0.0152636	2
ZNF595	4p16.3	4.01127e-18	2
ZNF597	16p13.3	5.21754e-14	2
ZNF607	19q13.1	0.0142649	2
ZNF615	19q13.41	8.22661e-18	2
ZNF669	1q44	3.29978e-05	2
ZNF689	16p11.2	1.00172e-10	2
ZNF71	19q13.4	0.000241982	2
ZNF716	7p11.2	0.00342382	2
ZNF717	3p12.3	9.17233e-06	2
ZNF730	19p12	2.82605e-10	2
ZNF75D	Xq26.3	7.01452e-11	2
ZNF773	19q13.43	0.0139334	2
ZNF780B	19q13.2	1.08008e-07	2
ZNF800	7q31.33	2.52128e-05	2
ZNF805	19q13.43	0.000108167	2
ZNF81	Xp11.23	0.0449112	2
ZNF841	19q13.41	0.00634183	2
ZNF876P	4p16.3	2.72823e-05	2
ZNF878	19p13.2	1.07128e-06	2
ZNF91	19p12	2.7256e-08	2
ZNRD1-AS1	-	5.6074e-05	2
ZNRF1	16q23.1	2.16491e-21	2
ZSCAN23	6p22.1	2.72015e-12	2
ZSWIM4	19p13.13	8.38309e-29	2
ASMTL	Xp22.3 and Yp11.3	4.25212e-09	2
A2M	12p13.31	2.28806e-14	1
A2ML1	12p13.31	1.25508e-23	1
A2MP1	12p13.31	0.0348615	1
A4GALT	22q13.2	0.00635452	1
AACSP1	5q35.3	4.39723e-06	1
AADAC	3q25.1	1.1956e-13	1
AADACL4	1p36.21	0.00456811	1
AAGAB	15q23	0.00146088	1
AARS2	6p21.1	1.19844e-12	1
AASDH	4q12	4.34648e-10	1
ABAT	16p13.2	8.48324e-31	1
ABCA1	9q31.1	3.71377e-22	1
ABCA5	17q24.3	1.70619e-44	1
ABCA8	17q24.2	3.75289e-68	1
ABCB10	1q42.13	2.08915e-06	1
ABCB1	7q21.12	6.02801e-47	1
ABCB6	2q35	0.0148884	1
ABCB8	7q36.1	5.90137e-13	1
ABCC6	16p13.11	3.95882e-32	1
ABCC8	11p15.1	5.2035e-16	1
ABCE1	4q31.21	7.17909e-08	1
ABHD11	7q11.23	2.28605e-12	1
ABHD13	13q33.3	4.59666e-05	1
ABHD17A	19p13.3	0.025925	1
ABI1	10p12.1	0.000218899	1
ABI3BP	3q12.2	5.92574e-34	1
ABL1	9q34.12	4.63226e-15	1
ABL2	1q25.2	5.32027e-07	1
ABLIM1	10q25.3	4.11914e-40	1
ABLIM3	5q32	1.69173e-73	1
ABT1	6p22.2	2.93136e-20	1
AC006116.24	-	4.03343e-17	1
ACAA1	3p22.2	0.00278286	1
ACAA2	18q21.1	5.25339e-14	1
ACAD10	12q24.12	5.1526e-05	1
ACAD11	3q22.1	7.99704e-23	1
ACAP1	17p13.1	0.00121626	1
ACAT1	11q22.3	1.03168e-17	1
ACAT2	6q25.3	2.31514e-16	1
ACBD3	1q42.12	2.64413e-11	1
ACCS	11p11.2	9.13056e-19	1
ACKR2	3p22.1	0.00280371	1
ACLY	17q21.2	0.0431021	1
ACN9	-	1.88145e-07	1
ACOT11	1p32.3	0.000608919	1
ACOX2	3p14.3	1.48388e-48	1
ACOX3	4p16.1	1.21012e-06	1
ACP5	19p13.2	0.00118174	1
ACSL6	5q31.1	4.0923e-07	1
ACSM2B	16p12.3	1.78712e-08	1
ACSM5	16p12.3	4.7856e-39	1
ACTA1	1q42.13	0.019072	1
ACTA2	10q23.31	4.40104e-25	1
ACTB	7p22.1	3.20336e-23	1
ACTL6A	3q26.33	2.6207e-39	1
ACTR5	20q11.23	2.90614e-07	1
ACTR8	3p21.1	4.52744e-07	1
ACTRT3	3q26.2	4.01965e-05	1
ACVR1	2q24.1	3.29983e-14	1
ADA	20q13.12	1.73325e-16	1
ADAD2	16q24.1	8.03225e-09	1
ADAM11	17q21.31	0.0153842	1
ADAM12	10q26.2	7.21698e-06	1
ADAM15	1q21.3	2.58011e-16	1
ADAM21	14q24.2	0.000988724	1
ADAM23	2q33.3	1.47191e-05	1
ADAMDEC1	8p21.2	8.68256e-29	1
ADAMTS13	9q34.2	0.0361514	1
ADAMTS14	10q22.1	3.07543e-27	1
ADAMTS15	11q24.3	2.47796e-52	1
ADAMTS17	15q26.3	0.000274166	1
ADAMTS5	21q21.3	5.30371e-66	1
ADAMTSL1	9p22.2-p22.1	8.30785e-15	1
ADAMTSL2	9q34.2	9.58216e-14	1
ADARB2	10p15.3	0.0255099	1
ADCK2	7q34	4.2406e-07	1
ADCK3	-	1.58557e-08	1
ADCY1	7p12.3	2.2302e-11	1
ADCY5	3q21.1	6.18135e-74	1
ADCY7	16q12.1	1.76131e-09	1
ADD2	2p13.3	1.41986e-07	1
ADH1A	4q23	1.09028e-22	1
ADH1C	4q23	1.11945e-64	1
ADIPOR2	12p13.33	1.69477e-06	1
ADM2	22q13.33	2.34324e-41	1
ADNP	20q13.13	7.80312e-05	1
ADORA2A	22q11.23	9.49721e-07	1
ADPRH	3q13.33	6.47781e-09	1
ADRA1A	8p21.2	5.37224e-23	1
ADRB2	5q32	4.0715e-60	1
ADRB3	8p11.23	0.000864586	1
ADRBK1	-	2.36391e-14	1
ADSL	22q13.1	9.50062e-18	1
ADSS	1q44	3.21152e-15	1
AEBP1	7p13	0.0122446	1
AFAP1L2	10q25.3	5.78668e-37	1
AFF3	2q11.2	6.97709e-38	1
AFF4	5q31.1	4.07427e-17	1
AFM	4q13.3	0.0183417	1
AFP	4q13.3	8.78455e-14	1
AGBL2	11p11.2	0.00253195	1
AGBL3	7q33	0.00440533	1
AGL	1p21.2	2.48421e-10	1
[truncated: 3,504 more rows]
