# Supplementary material for: Integrating Germline and Somatic Mutation Information for the Discovery of Biomarkers in Triple-Negative Breast Cancer
Source: Int J Environ Res Public Health. 2019 Mar 23;16(6):1055. doi: 10.3390/ijerph16061055 (PMC6466377; doi:10.3390/ijerph16061055)
Supplement: Supplementary file 1 [file ijerph-16-01055-s001.zip › JIANDE-TNBC-TABLE S1B.xlsx]

## Sheet: 07.TNBC.17466.DE.nonSom.comm.ge
Table S1B. List of significantly differentially expressed genes without somatic mutations along with adjusted expression p-values.
Gene name	Chromosome position	Adjusted expression P-values
SDPR/CAVIN2	2q32.3	1.62556e-94
FIGF/VEGFD	Xp22.2	8.49574e-93
UBE2C	20q13.12	3.92303e-91
TPX2	20q11.21	2.26136e-89
PLK1	16p12.2	1.65256e-85
FAXDC2	5q33.2	3.7169e-85
AURKA	20q13.2	2.73954e-84
SCN4B	11q23.3	9.30284e-83
NEK2	1q32.3	1.84346e-82
CENPA	2p23.3	3.98233e-81
CCNB2	15q22.2	1.144e-80
KIF20A	5q31.2	1.144e-80
KIF2C	1p34.1	1.144e-80
PTTG1	5q33.3	4.03873e-80
CDCA8	1p34.3	8.11364e-80
NOVA1	14q12	9.69624e-80
FAM83D	20q11.23	2.47255e-79
MELK	9p13.2	7.577e-79
UBE2T	1q32.1	1.76613e-78
BIRC5	17q25.3	2.84746e-78
CDK1	10q21.2	6.01296e-78
CCNB1	5q13.2	1.10037e-77
CDCA5	11q13.1	4.5338e-77
CDC45	22q11.21	2.41888e-76
JAM2	21q21.3	1.12018e-75
CCNA2	4q27	3.81894e-75
GTSE1	22q13.31	4.71761e-75
SPC24	19p13.2	8.23047e-75
PDGFD	11q22.3	2.15934e-74
CDKN3	14q22.2	4.70754e-74
KIF18B	17q21.31	4.70754e-74
SKA3	13q12.11	4.86603e-74
NDC80	18p11.32	1.11251e-73
RRM2	2p25.1	2.61596e-73
CDCA3	12p13.31	4.19822e-73
SPC25	2q31.1	2.44793e-72
ARHGAP20	11q22.3-q23.1	8.24446e-72
NCAPG	4p15.31	4.40932e-71
EZH1	17q21.2	4.55018e-71
HMGB3	Xq28	7.64834e-71
TTK	6q14.1	1.44536e-70
RBMS3	3p24.1	1.0068e-69
RAD51	15q15.1	1.01316e-69
CKS2	9q22.2	3.05032e-69
ORC6	16q11.2	5.01518e-69
RAPGEF3	12q13.11	2.06846e-68
THRB	3p24.2	2.06846e-68
TK1	17q25.3	2.53653e-68
KLHDC1	14q21.3	4.74756e-68
MME	3q25.2	4.74756e-68
E2F1	20q11.22	1.05452e-67
OGN	9q22.31	1.05452e-67
UBE2S	19q13.43	1.36354e-67
SHCBP1	16q11.2	1.52047e-67
FGF10	5p12	2.40147e-67
CENPM	22q13.2	3.45345e-67
LRRN4CL	11q12.3	9.64715e-67
SGOL1	-	1.65392e-66
TOP2A	17q21.2	1.82229e-66
KIF11	10q23.33	1.91759e-66
CDC25C	5q31.2	4.29125e-66
GINS1	20p11.21	5.52819e-66
NOSTRIN	2q24.3	6.23257e-66
FAM64A	-	2.08114e-65
PARK2	-	4.35523e-65
KIAA0101	-	4.98865e-65
DTL	1q32.3	5.55524e-65
SPARCL1	4q22.1	5.71379e-65
RP11-890B15.3	-	6.66552e-65
CA4	17q23.1	6.74221e-65
CALCOCO1	12q13.13	8.16813e-65
DEPDC1	1p31.3	8.26502e-65
MCM10	10p13	2.57833e-64
RAD54L	1p34.1	2.96136e-64
MAB21L1	13q13.3	3.76682e-64
CCDC167	6p21.2	5.10967e-64
TENC1	-	6.15253e-64
CHL1	3p26.3	6.37914e-64
STMN1	1p36.11	1.23126e-63
CTC-297N7.9	-	1.80112e-63
MAGI2-AS3	7q21.11	1.80112e-63
LHFP	-	5.60141e-63
MTFR2	6q23.3	7.91049e-63
WDFY3-AS2	4q21.23	9.68969e-63
THSD1	13q14.3	1.09938e-62
CBX7	22q13.1	1.13033e-62
MATN2	8q22.1-q22.2	1.2565e-62
PAQR4	16p13.3	1.36251e-62
RECQL4	8q24.3	1.38328e-62
SEMA3G	3p21.1	1.44399e-62
CDC6	17q21.2	2.35547e-62
EMCN	4q24	5.96692e-62
CDC25A	3p21.31	8.90477e-62
RP11-541N10.3	-	1.75858e-61
NKAPL	6p22.1	2.06681e-61
PDK4	7q21.3	2.79768e-61
H2AFZ	4q23	3.63583e-61
SLC7A5	16q24.2	4.57442e-61
GPC3	Xq26.2	7.4816e-61
NR3C2	4q31	1.12417e-60
POC1A	3p21.2	1.50296e-60
MND1	4q31.3	2.38358e-60
HN1	-	2.38746e-60
CXorf36	Xp11.3	2.66022e-60
CBX2	17q25.3	3.79559e-60
FBXL5	4p15.32	4.94967e-60
CTD-2510F5.4	-	5.32748e-60
ANGPTL1	1q25.2	5.38683e-60
DEPDC1B	5q12.1	5.47312e-60
RP11-875O11.1	-	7.7162e-60
MAOA	Xp11.3	9.55281e-60
TNS1	2q35	1.27394e-59
CENPN	16q23.2	1.30072e-59
HSPB6	19q13.12	1.57309e-59
RP11-303E16.2	-	1.62957e-59
NEIL3	4q34.3	2.01026e-59
ADH1B	4q23	3.25527e-59
RACGAP1	12q13.12	3.76465e-59
SEPP1	-	4.42046e-59
FEN1	11q12.2	7.3676e-59
COL4A3BP	5q13.3	1.10418e-58
GHR	5p13.1-p12	1.51166e-58
ATP5F1P5	-	2.32663e-58
ARRB1	11q13.4	2.35679e-58
ZWINT	10q21-q22	2.94297e-58
TCEAL7	Xq22.2	2.94535e-58
MIR497HG	17p13.1	3.09867e-58
IGIP	5q31.3	3.42003e-58
AVPR2	Xq28	3.58507e-58
TMTC1	12p11.22	3.60233e-58
PSRC1	1p13.3	4.50303e-58
PLSCR4	3q24	8.72217e-58
GNG11	7q21.3	1.03432e-57
CTPS1	1p34.2	1.09337e-57
SCN2B	11q23.3	1.28054e-57
H2AFX	11q23.3	1.70571e-57
RNASEH2A	19p13.13	1.72758e-57
BLM	15q26.1	2.2171e-57
DNAJB11	3q27.3	4.11175e-57
TMEM220	17p13.1	5.04233e-57
ACACB	12q24.11	6.15424e-57
IGFBP6	12q13.13	8.2573e-57
CENPO	2p23.3	9.00422e-57
FAM13A	4q22.1	1.01981e-56
CENPL	1q25.1	1.05597e-56
RP11-597D13.9	-	1.05597e-56
TSPAN7	Xp11.4	1.08416e-56
RNF180	5q12.3	2.44734e-56
FAM47E	4q21.1	3.90137e-56
CENPW	6q22.32	4.19573e-56
CCNDBP1	15q15.2	4.63075e-56
CHEK1	11q24.2	5.59177e-56
ZBTB16	11q23.2	5.67047e-56
FBXL17	5q21.3	1.11241e-55
PLIN1	15q26.1	1.15787e-55
MYCT1	6q25.2	1.16598e-55
HMGA1	6p21.31	2.03626e-55
NR3C1	5q31.3	2.12858e-55
CXCL12	10q11.21	2.81327e-55
CHRDL1	Xq23	3.62951e-55
PPP1R14B	11q13.1	4.70987e-55
ALDH1A2	15q21.3	4.94467e-55
VAMP2	17p13.1	6.23049e-55
DBF4	7q21.12	6.94206e-55
CLDN11	3q26.2	7.65315e-55
LYRM9	17q11.2	7.65315e-55
STIL	1p33	9.91008e-55
RP11-395L14.5	-	1.03312e-54
GIPC2	1p31.1	1.07742e-54
IL33	9p24.1	1.23793e-54
HCAR1	12q24.31	1.25693e-54
GALNT15	3p25.1	1.48355e-54
GSTM2	1p13.3	1.51202e-54
RP11-443B20.1	-	1.54645e-54
TPPP	5p15.33	1.70849e-54
RMI2	16p13.13	1.72839e-54
TICRR	15q26.1	1.73668e-54
APH1B	15q22.2	1.87901e-54
PPAP2A	-	3.17238e-54
PCNA	20p12.3	3.80887e-54
MSRB3	12q14.3	4.09349e-54
KIAA1524	-	5.33259e-54
BMX	Xp22.2	5.39757e-54
CENPU	4q35.1	6.78233e-54
FAM162B	6q22.1	6.78397e-54
GS1-259H13.2	-	6.91216e-54
CFD	19p13.3	7.98528e-54
C4orf32	-	8.13223e-54
NPR1	1q21.3	8.15912e-54
RUNDC3B	7q21.12	8.77154e-54
GPD1	12q13.12	1.14064e-53
SNRPC	6p21.31	1.37695e-53
PGM5-AS1	9q21.11	1.57746e-53
RP11-690D19.3	-	1.64857e-53
C20orf194	20p13	1.96083e-53
UFSP2	4q35.1	2.90332e-53
C16orf45	16p13.11	3.10774e-53
CALR	19p13.13	3.1448e-53
FGF1	5q31.3	3.22848e-53
C7orf63	-	3.98329e-53
SLC52A2	8q24.3	4.7686e-53
DARC	-	4.94229e-53
CES1	16q12.2	5.80649e-53
ITM2A	Xq21.1	6.48856e-53
CTC-297N7.5	-	7.98713e-53
CEP112	17q24.1	9.32382e-53
GDF10	10q11.22	1.01373e-52
ERG	21q22.2	1.52286e-52
TUBB	6p21.33	1.56088e-52
ESR1	6q25.1-q25.2	1.67673e-52
CIDEC	3p25.3	1.79233e-52
FOXO1	13q14.11	2.04521e-52
C16orf89	16p13.3	2.06613e-52
CTA-134P22.2	-	2.18456e-52
FAM172A	5q15	2.20658e-52
KLF9	9q21.12	2.4355e-52
FXYD1	19q13.12	2.58673e-52
MFAP4	17p11.2	2.67392e-52
CTD-2135D7.5	-	3.47183e-52
ARHGEF39	9p13.3	3.63293e-52
SH3BGRL2	6q14.1	3.68154e-52
FAM198B	4q32.1	4.02779e-52
EME1	17q21.33	4.36487e-52
CYP2U1	4q25	6.16464e-52
FABP4	8q21.13	7.35306e-52
CYB5D2	17p13.2	8.74297e-52
RP11-6N17.3	-	1.0102e-51
TYMS	18p11.32	1.22935e-51
ZCCHC24	10q22.3	1.22935e-51
RP11-481H12.1	-	1.8732e-51
RP11-180N14.1	-	2.12084e-51
DSCC1	8q24.12	2.16065e-51
EBF1	5q33.3	2.33757e-51
STAT5B	17q21.2	2.77018e-51
COX7A1	19q13.12	3.07304e-51
TUSC5	17p13.3	3.51046e-51
GSG2	-	4.12196e-51
RP11-309N17.4	-	5.90974e-51
LMNB2	19p13.3	6.35688e-51
MRGPRF	11q13.3	8.01391e-51
CREBRF	5q35.1	8.25101e-51
MICU3	8p22	9.69956e-51
MRPL14	6p21.1	1.05884e-50
MIR145	5q32	1.13355e-50
RANBP1	22q11.21	1.18578e-50
MTURN	7p14.3	1.27915e-50
LYVE1	11p15.4	1.40524e-50
TBC1D9	4q31.21	1.46022e-50
RP11-169D4.1	-	1.92235e-50
PPAP2B	-	1.94837e-50
BCL2	18q21.33	2.19272e-50
WDR62	19q13.12	2.37525e-50
SEMA6D	15q21.1	2.80404e-50
LRRC37A17P	17q21.32	3.1929e-50
PSMD14	2q24.2	4.34698e-50
MOCS1	6p21.2	4.54743e-50
ALAD	9q32	4.86911e-50
LAGE3	Xq28	4.99306e-50
RP11-363E7.4	-	5.25579e-50
ADCY4	14q12	6.50233e-50
AQP7	9p13.3	7.70224e-50
EIF4E3	3p13	7.70528e-50
HNMT	2q22.1	7.97329e-50
SSBP2	5q14.1	8.02386e-50
KLF4	9q31.2	9.56004e-50
PSMB4	1q21.3	9.59677e-50
CLDN5	22q11.21	1.41691e-49
PARPBP	12q23.2	1.78748e-49
FOSB	19q13.32	1.84018e-49
BAK1	6p21.31	1.85064e-49
FHL5	6q16.1	2.22607e-49
TSLP	5q22.1	2.31508e-49
CDC7	1p22.1	2.59508e-49
FZD4	11q14.2	2.89471e-49
JTB	1q21.3	3.13102e-49
MGLL	3q21.3	3.18305e-49
RPH3AL	17p13.3	3.36488e-49
SPRY2	13q31.1	3.81581e-49
LSM4	19p13.1	4.37107e-49
SNRPG	2p13.3	4.64422e-49
MIR143	5q32	5.44832e-49
CACYBP	1q25.1	6.09541e-49
HSPE1	2q33.1	7.14199e-49
S1PR1	1p21.2	7.76304e-49
LINC00478	-	8.41809e-49
GFRA1	10q25.3	8.65984e-49
EPAS1	2p21	8.8765e-49
LEP	7q32.1	9.17941e-49
TMEM88	17p13.1	9.599e-49
PHYHIP	8p21.3	1.00335e-48
GSN	9q33.2	1.09784e-48
PPARG	3p25.2	1.14886e-48
PHYHD1	9q34.11	1.20708e-48
MRPL13	8q24.12	1.31633e-48
SESN1	6q21	1.44473e-48
DCN	12q21.33	1.47871e-48
CDO1	5q22.3	2.37561e-48
CDCA4	14q32.33	2.43163e-48
SSPN	12p11.2	2.43266e-48
PLAUR	19q13	2.47889e-48
XRCC2	7q36.1	2.47889e-48
C3orf18	3p21.31	2.49696e-48
RP11-968O1.5	-	2.65598e-48
GPRIN1	5q35.2	2.92791e-48
PRDX4	Xp22.11	3.33904e-48
CCNF	16p13.3	3.47842e-48
ASPA	17p13.2	3.55804e-48
P2RY12	3q25.1	4.03384e-48
MEOX1	17q21.31	4.08784e-48
COLGALT1	19p13.11	4.23087e-48
CTD-2555O16.2	-	5.04959e-48
ECM2	9q22.31	6.17387e-48
ADRA2A	10q25.2	6.38242e-48
NME1	17q21.33	6.83334e-48
ZHX3	20q12	7.06685e-48
BOP1	8q24.3	8.35961e-48
PRCC	1q23.1	8.91071e-48
PAXIP1-AS2	7q36.2	9.23206e-48
RHOJ	14q23.2	9.92485e-48
NXPH3	17q21.33	1.01789e-47
CDCA7	2q31.1	1.90659e-47
MRGBP	20q13.33	1.98142e-47
ADIPOQ	3q27.3	2.52051e-47
TPCN1	12q24.13	2.63371e-47
SYNJ2BP	14q24.2	2.69975e-47
SASH1	6q24.3-q25.1	2.89664e-47
ALYREF	17q25.3	3.08041e-47
JADE1	4q28.2	3.29657e-47
TPRG1	3q28	3.55875e-47
CPE	4q32.3	3.75564e-47
RP5-965F6.2	-	3.89401e-47
RFC2	7q11.23	4.02459e-47
RRP36	6p21.1	4.12339e-47
NTN4	12q22	5.64219e-47
PYCR1	17q25.3	5.74986e-47
MRPL47	3q26.33	6.55175e-47
ACER2	9p22.1	6.62644e-47
CTD-2555O16.4	-	6.65194e-47
DNAJC18	5q31.2	7.07395e-47
RP11-51B23.3	-	7.57513e-47
ECSCR	5q31.2	7.58416e-47
TMEM246	9q31.1	8.07522e-47
GPAM	10q25.2	8.21506e-47
LIPE	19q13.2	8.25868e-47
BCL2L12	19q13.33	9.89263e-47
ROBO4	11q24.2	1.04031e-46
FAM214A	15q21.2-q21.3	1.10848e-46
NDN	15q11.2	1.13173e-46
GGH	8q12.3	1.25525e-46
RMDN2	2p22.2	1.32264e-46
VPS72	1q21.3	1.33444e-46
PITX1	5q31.1	1.52518e-46
ARF1	1q42.13	1.55564e-46
TAL1	1p33	1.64786e-46
STEAP2	7q21.13	2.11369e-46
SLC35A2	Xp11.23	2.18454e-46
RP3-333A15.2	-	2.60473e-46
RELT	11q13.2	2.68587e-46
TFPI	2q32.1	2.68587e-46
PDK2	17q21.33	3.5539e-46
RUNX1T1	8q21.3	3.76296e-46
EBF3	10q26.3	3.96745e-46
SOCS2	12q	3.97015e-46
EGFLAM	5p13.2-p13.1	4.31571e-46
OXTR	3p25.3	4.42119e-46
PFN1	17p13.2	5.3017e-46
SNRPD1	18q11.2	5.40781e-46
CALCOCO2	17q21.32	5.58857e-46
SAMD1	19p13.12	6.76097e-46
RNASE4	14q11.2	7.41456e-46
USP53	4q26	7.74031e-46
PPP1R14BP3	4q31.1	7.75885e-46
ZNF695	1q44	8.40199e-46
PFDN2	1q23.3	9.37331e-46
KCNIP2	10q24.32	9.91215e-46
HAUS8	19p13.11	1.01598e-45
RP11-736K20.5	-	1.23659e-45
SAPCD2	9q34.3	1.34714e-45
AQP1	7p14.3	1.54813e-45
AL163636.6	-	1.55237e-45
KCTD5	16p13.3	1.59248e-45
TEF	22q13.2	1.69418e-45
C10orf32	-	1.88874e-45
RERGL	12p12.3	2.059e-45
TPM3	1q21.3	2.09142e-45
CCM2L	20q11.21	2.51598e-45
DPT	1q24.2	2.75311e-45
EEPD1	7p14.2	2.81599e-45
C11orf82	-	3.14797e-45
ABCG2	4q22.1	3.18813e-45
SRPX	Xp11.4	3.51165e-45
CKS1B	1q21.3	3.63395e-45
LRRC59	17q21.33	3.64357e-45
CTD-3157E16.1	-	3.82398e-45
THRSP	11q14.1	4.30347e-45
TMEM132A	11q12.2	5.64591e-45
CLIC5	6p21.1	5.66751e-45
NBR1	17q21.31	5.81016e-45
GS1-259H13.10	-	6.82316e-45
CKAP2	13q14.3	6.8426e-45
KLHL29	2p24.1	7.14569e-45
MTHFD2	2p13.1	8.93976e-45
HRASLS5	11q12.3	9.01313e-45
TMEM252	9q21.11	9.01313e-45
FAM110D	1p36.11	9.30862e-45
AC004947.2	-	9.33867e-45
ABRACL	6q24.1	1.058e-44
CMC2	16q23.2	1.19321e-44
SLC25A19	17q25.1	1.57315e-44
PRIM2	6p11.2	1.62996e-44
SUV39H2	10p13	1.64626e-44
AC093850.2	-	1.96744e-44
CHAF1B	21q22.12-q22.13	2.50594e-44
PPM1G	2p23.3	3.10221e-44
CTA-941F9.9	-	3.27319e-44
MIR143HG	-	3.60412e-44
SNRPA1	15q26.3	3.64866e-44
KLHL3	5q31.2	3.76059e-44
TTYH3	7p22.3	4.52154e-44
TIMELESS	12q13.3	4.83168e-44
EHD2	19q13.33	5.114e-44
PEX11A	15q26.1	5.338e-44
FAM203A	-	5.45753e-44
RGAG4	-	5.96767e-44
CAV2	7q31.2	5.98971e-44
EDA2R	Xq12	6.80233e-44
RP11-50E11.3	-	6.82557e-44
LURAP1	1p34.1	7.15183e-44
RP11-582J16.4	-	7.45614e-44
MAP1LC3C	1q43	7.7115e-44
CFL1	11q13.1	8.02928e-44
SLC27A1	19p13.11	9.52924e-44
CHEK2	22q12.1	1.03785e-43
RPL39L	3q27.3	1.06762e-43
AC034220.3	-	1.21017e-43
LINC00641	14q11.2	1.22293e-43
CD302	2q24.2	1.39311e-43
POP7	7q22.1	1.51256e-43
AASS	7q31.32	1.81738e-43
MRPL15	8q11.23	1.9363e-43
TBC1D7	6p24.1	2.05871e-43
HSD17B6	12q13.3	2.16075e-43
KIAA1456	-	2.4814e-43
CTB-36H16.2	-	2.50365e-43
ZNF385D	3p24.3	2.68717e-43
ECT2	3q26.31	2.71511e-43
TACC1	8p11.22	2.77269e-43
SAMD8	10q22.2	3.07336e-43
RP11-159H22.2	-	3.24234e-43
TPI1	12p13.31	3.59184e-43
RP3-483K16.4	-	4.0317e-43
MIS18A	21q22.11	4.32457e-43
PCDHGA9	5q31	4.66324e-43
FGF2	4q28.1	4.87413e-43
PNP	14q11.2	4.87666e-43
CTHRC1	8q22.3	5.59741e-43
TK2	16q21	5.60896e-43
E2F3	6p22.3	5.76093e-43
CTC-203F4.2	-	7.99844e-43
AC006129.1	-	9.83436e-43
CTD-2547L16.1	-	9.90053e-43
RP11-5C23.1	-	1.0363e-42
NUP93	16q13	1.06783e-42
HPRT1	Xq26.2-q26.3	1.08735e-42
RHBDF2	17q25.3	1.09061e-42
MIR4653	7q22.1	1.14529e-42
GGTA1P	9q33.2	1.18279e-42
C20orf24	-	1.23921e-42
ADHFE1	8q13.1	1.27232e-42
STEAP4	7q21.12	1.48494e-42
PIF1	15q22.31	1.51015e-42
PDSS1	10p12.1	1.53134e-42
SNRPB	20p13	1.64311e-42
LINC00663	19p13.11	1.76709e-42
SAP30L	5q33.2	1.79898e-42
RP11-166D19.1	-	1.91106e-42
CASP12	11q22.3	2.07808e-42
JAM3	11q25	2.14937e-42
PGR	11q22.1	2.1719e-42
CD3EAP	19q13.32	2.39537e-42
LINC00993	10p11.21	2.40135e-42
RP11-855A2.5	-	2.45465e-42
CCNG1	5q34	2.53594e-42
HBB	11p15.4	2.96526e-42
REEP4	8p21.3	3.08788e-42
CDH5	16q21	3.23291e-42
ADD1	4p16.3	3.41826e-42
PDCD5	19q13.11	3.73907e-42
RABIF	1q32.1	4.25033e-42
PSMB2	1p34.3	4.69242e-42
ADCYAP1R1	7p14.3	4.8201e-42
MEIS3P1	17p12	4.8201e-42
MTERFD1	-	5.26037e-42
KCTD12	13q22.3	5.35938e-42
C14orf28	14q21.2	5.98773e-42
B4GALT3	1q23.3	6.15945e-42
CDC14B	9q22.32-q22.33	6.19987e-42
ETFDH	4q32.1	6.19987e-42
GAPDH	12p13.31	6.99151e-42
TMPO-AS1	12q23.1	7.23084e-42
AC002451.3	-	7.39713e-42
IL4I1	19q13.33	7.39713e-42
DDO	6q21	8.73685e-42
CES2	16q22.1	1.03499e-41
APBB2	4p14-p13	1.03551e-41
STARD13	13q13.1	1.05396e-41
PURA	5q31.3	1.05836e-41
TTBK2	15q15.2	1.21762e-41
TRABD2B	1p33	1.39723e-41
ITGA7	12q13.2	1.48018e-41
PAFAH1B3	19q13.1	1.66746e-41
STK32B	4p16.2	1.75773e-41
CLDN19	1p34.2	1.83761e-41
DCUN1D3	16p12.3	1.95277e-41
ELAVL1	19p13.2	2.03674e-41
FAM122A	9q21.11	2.07346e-41
KIF22	16p11.2	2.2878e-41
CREBL2	12p13.1	2.394e-41
ZNF25	10p11.21	2.40412e-41
CXCL14	5q31.1	2.46748e-41
CDNF	10p13	2.5376e-41
NUBPL	14q12	3.02716e-41
HNRNPAB	5q35.3	3.31689e-41
GJB2	13q12.11	3.64491e-41
GNG12-AS1	1p31.3	3.64491e-41
SHMT2	12q12-q14	3.64491e-41
CDK2AP1	12q24.31	3.71195e-41
SHFM1	-	3.72464e-41
CXCL10	4q21.1	4.31129e-41
CMA1	14q12	4.45543e-41
RP1-34H18.1	-	4.53045e-41
GPRASP2	Xq22.1	4.76051e-41
IRS1	2q36.3	5.17582e-41
LPAR6	13q14.2	5.38778e-41
RBMS2	12q13.3	5.42151e-41
YIF1B	19q13.2	6.42796e-41
SOX17	8q11.23	7.74823e-41
ATP8A2P1	10p11.21	7.85678e-41
CABLES2	20q13.33	7.94377e-41
CEP120	5q23.2	9.3122e-41
SIK2	11q23.1	1.03732e-40
MTHFD1L	6q25.1	1.09835e-40
MAGI2	7q21.11	1.14139e-40
MMP1	11q22.2	1.14468e-40
RP11-175K6.1	-	1.33791e-40
C1orf112	1q24.2	1.53428e-40
CRTAP	3p22.3	1.5866e-40
MCM5	22q12.3	1.6127e-40
TOM1L2	17p11.2	1.66419e-40
NUDT16	3q22.1	1.72076e-40
POLR2H	3q27.1	1.90851e-40
FAM136A	2p13.3	2.13519e-40
ANGPTL2	9q33.3	2.15924e-40
PARD3B	2q33.3	2.51584e-40
CGRRF1	14q22.2	2.84703e-40
MLTK	-	2.92453e-40
RP11-1024P17.1	-	3.11321e-40
ADAMTS9-AS2	3p14.1	3.46682e-40
METTL20	-	3.46682e-40
LSM2	6p21.33	3.55272e-40
RP11-384P7.7	-	3.67546e-40
PKMP3	6q14.3	3.73702e-40
POLE2	14q21.3	3.91596e-40
WDR77	1p13.2	4.65975e-40
LINC00511	17q24.3	4.97393e-40
TCF19	6p21.33	5.09115e-40
OLFML1	11p15.4	5.83508e-40
ARHGEF40	14q11.2	6.12471e-40
GINS4	8p11.21	6.20312e-40
PDIA4	7q36.1	6.40125e-40
NCAPG2	7q36.3	6.53694e-40
KLHDC2	14q21.3	6.79595e-40
2019-03-08	10q11.21-q11.22	6.8484e-40
NFE2L3	7p15.2	6.8484e-40
PDE8B	5q13.3	6.8484e-40
SQLE	8q24.13	7.00524e-40
TACR1	2p12	7.63797e-40
TSTA3	8q24.3	7.69875e-40
MKL2	16p13.12	7.87603e-40
SLC40A1	2q32.2	7.98953e-40
LPL	8p21.3	8.74046e-40
ZNF728	19p12	8.85403e-40
RP11-367J11.3	-	8.93015e-40
HSPA12B	20p13	9.31351e-40
TEAD4	12p13.33	1.0664e-39
RP11-1000B6.3	-	1.12308e-39
HMGB2	4q34.1	1.22482e-39
DNALI1	1p34.3	1.25408e-39
GLYAT	11q12.1	1.42924e-39
CDC123	10p14-p13	1.4955e-39
HSPB8	12q24.23	1.82215e-39
RAD54B	8q22.1	1.89825e-39
AUH	9q22.31	1.95307e-39
PALM	19p13.3	2.01208e-39
SEC13	3p25.3	2.10106e-39
BYSL	6p21.1	2.31212e-39
NACC1	19p13.13	2.3158e-39
EIF4B	12q13.13	2.83833e-39
RTKN2	10q21.2	2.91465e-39
CKAP4	12q23.3	3.24543e-39
CSRNP1	3p22.2	3.29497e-39
UBAP2L	1q21.3	3.63396e-39
LAPTM4B	8q22.1	3.65189e-39
FAM149A	4q35.1	3.75125e-39
CNRIP1	2p14	4.11024e-39
KANK3	19p13.2	4.4067e-39
ME3	11q14.2	4.85872e-39
FGF10-AS1	5p12	4.94015e-39
PPP1R14A	19q13.1	5.39736e-39
GABARAPL1	12p13.2	5.503e-39
USP30	12q24.11	6.05866e-39
POP1	8q22.2	6.14434e-39
GNAL	18p11.21	6.17284e-39
BTG2	1q32.1	6.20681e-39
AR	Xq12	6.58236e-39
MRPS12	19q13.2	6.91654e-39
SAC3D1	11q13.1	7.53435e-39
CDK16	Xp11.3	7.6261e-39
MCM7	7q22.1	7.99547e-39
RP11-20F24.2	-	8.46507e-39
PABPC1P4	12q14.2	8.54756e-39
SLC17A7	19q13.33	9.00385e-39
SLC46A1	17q11.2	1.0041e-38
ZFP2	5q35.3	1.02015e-38
C11orf84	-	1.02598e-38
OLFML2A	9q33.3	1.11919e-38
TMEM135	11q14.2	1.13424e-38
PFKFB1	Xp11.21	1.16998e-38
TRAIP	3p21.31	1.19142e-38
RP11-464C19.3	-	1.19633e-38
NNAT	20q11.23	1.2204e-38
ISM1	20p12.1	1.26327e-38
C2orf73	2p16.2	1.70697e-38
HSPB7	1p36.13	1.70697e-38
RP11-158M2.3	-	1.77668e-38
CHAF1A	19p13.3	1.85133e-38
ACOT7	1p36.31	1.85881e-38
LINC01058	13q12.3	1.85964e-38
LIMD2	17q23.3	2.03946e-38
GATAD2A	19p13.11	2.1685e-38
TMEM47	Xp21.1	2.28878e-38
RP11-403A21.1	-	2.4802e-38
CIRBP	19p13.3	2.59245e-38
HOMER3	19p13.11	2.59306e-38
BRIP1	17q23.2	2.68144e-38
RABL3	3q13.33	2.68151e-38
PPAPDC1A	-	3.08289e-38
EIF5A	17p13.1	3.1891e-38
NIPSNAP3B	9q31.1	3.20732e-38
MSANTD3	9q31.1	3.41514e-38
MANF	3p21.2	3.61511e-38
HOXB-AS1	17q21.32	4.2125e-38
PCDHGB6	5q31	4.35733e-38
OMD	9q22.31	4.39252e-38
SLC25A46	5q22.1	4.54338e-38
MIR23A	19p13.12	4.7627e-38
HENMT1	1p13.3	4.92115e-38
LEPROT	1p31.3	5.0212e-38
SELP	1q24.2	5.23446e-38
PWAR6	15q11.2	5.51965e-38
THRB-AS1	3p24.2	5.75063e-38
ABHD14B	3p21.2	7.12152e-38
RP11-2E11.5	-	7.38672e-38
MOGS	2p13.1	7.9799e-38
DNAJB4	1p31.1	9.12804e-38
FPGT-TNNI3K	1p31.1	9.92197e-38
F3	1p21.3	9.98588e-38
SNX33	15q24.2	1.00269e-37
GALNT16	14q24.1	1.08334e-37
FOXP3	Xp11.23	1.15153e-37
SNRPGP2	18q21.2	1.31761e-37
ADAM8	10q26.3	1.42365e-37
CLMP	11q24.1	1.47723e-37
KLF2	19p13.11	1.47811e-37
TSEN15	1q25.3	1.52597e-37
ITM2B	13q14.2	1.54759e-37
SNRK	3p22.1	1.61176e-37
GPR124	-	1.67105e-37
AGAP11	10q23.2	1.72221e-37
SPDL1	5q35.1	1.73046e-37
ESM1	5q11.2	1.74338e-37
HERC2P9	15q13.1	1.77349e-37
RUVBL1	3q21.3	1.77806e-37
EBF2	8p21.2	1.79487e-37
RAN	12q24.33	1.83199e-37
RP11-424C20.2	-	1.85606e-37
CTB-33O18.1	-	1.87475e-37
ADAM19	5q33.3	1.92886e-37
METTL7A	12q13.12	2.08828e-37
RNU6-529P	10q23.2	2.08828e-37
AP3S2	15q26.1	2.20848e-37
SRPRB	3q22.1	2.34657e-37
SMS	Xp22.11	2.37223e-37
ZNF367	9q22.32	2.38021e-37
C1orf132	-	2.46095e-37
RP11-138I17.1	-	2.58324e-37
RP11-571L19.8	-	2.86771e-37
APOD	3q29	2.92532e-37
MAGOH	1p32.3	2.99253e-37
ARPC5L	9q33.3	3.84561e-37
DPY30	2p22.3	3.90188e-37
NICN1	3p21.31	3.92285e-37
PECAM1	17q23.3	3.9752e-37
CBX3	7p15.2	4.1997e-37
AP1S1	7q22.1	4.39616e-37
DCLK1	13q13.3	4.58537e-37
PRDX1	1p34.1	5.28879e-37
PCCA	13q32.3	5.36926e-37
RNLS	10q23.31	5.64041e-37
FBXO8	4q34.1	5.67968e-37
UQCC2	6p21.31	5.7173e-37
SPATA7	14q31.3	5.74372e-37
RP11-78O7.2	-	6.22249e-37
PSMA4	15q25.1	6.22833e-37
FGF14-AS2	13q33.1	6.38137e-37
C8orf88	8q21.3	6.48315e-37
LDHD	16q23.1	6.56485e-37
ZC3H6	2q14.1	6.76335e-37
FOXN3	14q31.3-q32.11	6.7861e-37
C10orf128	-	7.42313e-37
BCL2L2	14q11.2	8.19037e-37
FOXK2	17q25.3	9.58389e-37
RCOR2	11q13.1	1.04568e-36
ELMOD3	2p11.2	1.08681e-36
KAT2B	3p24.3	1.12425e-36
SNCG	10q23.2	1.14251e-36
TTC13	1q42.2	1.27561e-36
PRR19	19q13.2	1.28572e-36
C11orf63	-	1.31209e-36
WDR4	21q22.3	1.35994e-36
RP11-64C12.8	-	1.36052e-36
APOO	Xp22.11	1.47139e-36
IGF1	12q23.2	1.59402e-36
C1orf115	1q41	1.66167e-36
HSD17B11	4q22.1	1.68407e-36
RP11-102N12.3	-	1.74068e-36
PELI2	14q22.3	1.74845e-36
PSMG3	7p22.3	1.88506e-36
NUTF2	16q22.1	1.98367e-36
DAZAP1	19p13.3	2.04782e-36
UQCRH	1p33	2.13391e-36
GOLGA8N	15q13.3	2.3163e-36
RANGAP1	22q13.2	2.36499e-36
CHURC1	14q23.3	2.40911e-36
LYRM7	5q23.3-q31.1	2.45923e-36
PPP4C	16p11.2	2.46104e-36
CDS2	20p12.3	2.54012e-36
ALDH6A1	14q24.3	2.55917e-36
RP1-191J18.66	-	2.67313e-36
MLXIPL	7q11.23	2.79682e-36
RP4-575N6.4	-	2.90828e-36
TLCD1	17q11.2	3.09371e-36
WWC2-AS2	4q35.1	3.14796e-36
RP11-554A11.4	-	3.17224e-36
PSMG1	21q22.2	3.29133e-36
TCEAL1	Xq22.2	3.29423e-36
ACBD4	17q21.31	3.48312e-36
PPP1CA	11q13	3.55257e-36
LPCAT1	5p15.33	3.62425e-36
KIF13B	8p12	3.67682e-36
DNASE1L3	3p14.3	3.75048e-36
CTD-2081C10.7	-	4.32396e-36
RBM43	2q23.3	4.45335e-36
HOXC13	12q13.13	4.46913e-36
CHL1-AS2	3p26.3	4.70897e-36
MIR22HG	17p13.3	4.99771e-36
CNIH2	11q13.2	5.13142e-36
ADCY6	12q13.12	5.34946e-36
FAM69A	1p22.1	5.52412e-36
PSAT1P3	1p31.1	5.75438e-36
ACADS	12q24.31	6.0063e-36
FAM96A	15q22.31	6.13772e-36
RP11-545I5.3	-	7.32821e-36
POU6F1	12q13.13	8.90696e-36
PNPLA2	11p15.5	9.52556e-36
AC093609.1	-	1.02397e-35
GPX3	5q33.1	1.02397e-35
FOXP1	3p13	1.0266e-35
ADRBK2	-	1.07035e-35
SRSF5	14q24	1.14454e-35
RP11-335L23.5	-	1.17029e-35
RBMS3-AS3	3p24.1	1.20024e-35
TMEM232	5q22.1	1.35682e-35
LINC00908	18q23	1.40676e-35
HTR7P1	12p13.1	1.40934e-35
SNCA	4q22.1	1.42237e-35
CFL2	14q13.1	1.45923e-35
PDE7B	6q23.3	1.54155e-35
LRWD1	7q22.1	1.57306e-35
GLRA4	Xq22.2	1.57966e-35
PLA2G16	11q12.3-q13.1	1.64008e-35
ISG20L2	1q23.1	1.64411e-35
HNRNPA1P21	3p22.1	1.72564e-35
HCG23	6p21.32	1.75525e-35
ZDHHC17	12q21.2	1.84424e-35
RP11-507K2.3	-	1.90345e-35
RGS5	1q23.3	1.91737e-35
CLEC1A	12p13.2	2.09926e-35
RTKN	2p13.1	2.10198e-35
CTXN1	19p13.2	2.2594e-35
WBSCR22	-	2.42539e-35
HSD17B13	4q22.1	2.73833e-35
ZNF781	19q13.12	2.89855e-35
HOGA1	10q24.2	3.07841e-35
RSPO3	6q22.33	3.0869e-35
DNAL1	14q24.3	3.10836e-35
C11orf24	11q13.2	3.23655e-35
NT5DC2	3p21.1	3.27806e-35
PCAT6	1q32.1	3.27806e-35
CSNK2B	6p21.33	3.37703e-35
LIAS	4p14	3.4561e-35
SNRPE	1q32.1	3.74637e-35
GSTM5	1p13.3	3.93794e-35
NFKBIE	6p21.1	4.02279e-35
MIR568	3q13.31	4.08924e-35
CTA-384D8.35	-	4.21827e-35
MOB3C	1p33	4.36022e-35
MAD2L2	1p36.22	4.38354e-35
RP11-597D13.7	-	4.58129e-35
AC132008.1	-	4.79685e-35
BANF1	11q13.1	4.84872e-35
FMOD	1q32.1	4.92628e-35
ATP5J2	-	4.9467e-35
OR7E38P	7q21.3	5.31141e-35
RP11-513M16.8	-	5.41068e-35
GRAMD1A	19q13.11	5.66575e-35
AL035610.1	-	5.9722e-35
AMIGO2	12q13.11	6.00121e-35
AGR3	7p21.1	6.17813e-35
GPR19	12p13.1	6.44807e-35
RP11-386I14.2	-	6.46419e-35
DCUN1D5	11q22.3	6.63179e-35
TMSB10	2p11.2	6.84506e-35
WDR86-AS1	7q36.1	6.93436e-35
GLDN	15q21.2	7.52137e-35
TAF11	6p21.31	7.57481e-35
SEMA5A	5p15.31	8.22627e-35
NUDT1	7p22.3	8.88369e-35
SEC61G	7p11.2	9.45827e-35
RP11-506K6.4	-	9.46382e-35
LINC00517	14q21.1	1.00963e-34
GIMAP6	7q36.1	1.01176e-34
SPATA20P1	21q22.13	1.04247e-34
TCF3	19p13.3	1.08801e-34
ISCU	12q23.3	1.11432e-34
SLC39A4	8q24.3	1.16328e-34
CYCS	7p15.3	1.16521e-34
RP1-18D14.7	-	1.22376e-34
ZNF366	5q13.1	1.22746e-34
RP11-788M5.3	-	1.30101e-34
FITM2	20q13.12	1.38821e-34
RAMP2-AS1	17q21.2	1.49118e-34
RP11-372K14.2	-	1.53528e-34
HSDL2	9q32	1.60454e-34
AP000473.8	-	1.71994e-34
SLC35F2	11q22.3	1.74913e-34
GRIA4	11q22.3	1.83673e-34
PTH1R	3p21.31	1.88201e-34
SNX1	15q22.31	2.00232e-34
EBP	Xp11.23	2.00522e-34
COL17A1	10q25.1	2.01598e-34
ANG	14q11.2	2.04133e-34
LIFR-AS1	5p13.1	2.04945e-34
EXOSC4	8q24.3	2.05208e-34
AC116035.1	-	2.07321e-34
SLC25A39	17q21.31	2.13361e-34
C6orf136	6p21.33	2.20816e-34
CTB-51J22.1	-	2.31868e-34
RAP2B	3q25.2	2.44509e-34
RP3-337H4.8	-	2.46328e-34
LNPEP	5q15	2.47205e-34
CTD-2382E5.4	-	2.51395e-34
YDJC	22q11.21	2.55499e-34
SGK2	20q13.12	2.60609e-34
RBPMS	8p12	2.6067e-34
CSK	15q24.1	2.70072e-34
CXCL11	4q21.1	2.71707e-34
PID1	2q36.3	2.76693e-34
SOX7	8p23.1	2.7671e-34
TUBG2	17q21.2	2.80987e-34
DTWD1	15q21.2	2.92949e-34
FBXL3	13q22.3	3.08886e-34
TRIM11	1q42.13	3.24554e-34
OTX1	2p15	3.31482e-34
IDH2	15q26.1	3.46633e-34
UBE2SP1	17p12	3.83445e-34
CCDC85A	2p16.1	3.89889e-34
EBNA1BP2	1p34.2	4.09999e-34
TMEM37	2q14.2	4.14983e-34
PSMC2	7q22.1	4.5129e-34
PARP3	3p21.2	4.51789e-34
SEPSECS	4p15.2	4.60241e-34
NEK10	3p24.1	4.81113e-34
AC005550.4	-	5.2273e-34
STARD8	Xq13.1	5.46941e-34
PFKFB3	10p15.1	5.80097e-34
RP11-57H14.4	-	5.89695e-34
SLC25A21-AS1	14q13.3	6.07896e-34
EID1	15q21.1	6.42608e-34
PPP1R1A	12q13.2	6.43891e-34
CHST11	12q23.3	7.0718e-34
KLB	4p14	7.09016e-34
SLC10A6	4q21.3	7.37209e-34
PTCD2	5q13.2	7.43301e-34
DFNB59	-	7.58153e-34
BEND3	6q21	7.82949e-34
RP11-108L7.15	-	8.17815e-34
CTD-3065J16.9	-	8.65979e-34
RP1-28O10.1	-	8.99675e-34
MRPL3	3q22.1	9.83304e-34
TIE1	1p34.2	1.01736e-33
C6orf3	-	1.03154e-33
RP11-389C8.2	-	1.08903e-33
TBCB	19q13.12	1.11032e-33
THSD4	15q23	1.14411e-33
RGS19	20q13.33	1.16567e-33
ERI3	1p34.1	1.21966e-33
CTD-2292M16.8	-	1.2202e-33
CTSG	14q12	1.2657e-33
CHAC1	15q15.1	1.37307e-33
POLR3K	16p13.3	1.38121e-33
RNF125	18q12.1	1.40032e-33
EIF4EBP1	8p11.23	1.4156e-33
FERMT2	14q22.1	1.4332e-33
MRPL17	11p15.5-p15.4	1.46162e-33
PUSL1	1p36.33	1.51682e-33
GSTM3	1p13.3	1.52696e-33
SERP2	13q14.11	1.56937e-33
CHRNA5	15q25.1	1.59787e-33
NDFIP1	5q31.3	1.61764e-33
FBXL19	16p11.2	1.77226e-33
SUCLA2	13q14.2	1.81286e-33
RP11-286B14.1	-	1.82658e-33
ACSS2	20q11.22	1.99163e-33
RP11-23N2.4	-	2.084e-33
GS1-421I3.4	-	2.09689e-33
HMGN2P15	17q21.2	2.1734e-33
C1orf131	1q42.2	2.18099e-33
GTPBP4	10p15.3	2.20313e-33
LRRN3	7q31.1	2.20535e-33
RP1-228H13.5	-	2.22485e-33
COL4A6	Xq22.3	2.29262e-33
PLOD1	1p36.22	2.40639e-33
MIR3936	5q31.1	2.54174e-33
RP11-141M1.3	-	2.56121e-33
LRRTM2	5q31.2	2.59994e-33
FAM83H-AS1	8q24.3	2.60218e-33
YKT6	7p13	2.68919e-33
AP000251.3	-	2.76493e-33
RP11-276H19.1	-	2.81504e-33
EIF3J-AS1	15q21.1	3.08663e-33
VAMP3	1p36.23	3.13801e-33
RQCD1	-	3.14065e-33
MRPL37	1p32.3	3.48034e-33
SAMD5	6q24.3	3.50997e-33
RP11-554A11.6	-	3.58964e-33
CKMT2-AS1	5q14.1	3.759e-33
PDAP1	7q22.1	4.10306e-33
AMOTL2	3q22.2	4.1206e-33
ATG2B	14q32.2	4.13759e-33
ESYT1	12q13.2	4.23597e-33
ARHGEF28	5q13.2	4.4051e-33
RP11-451M19.3	-	4.43848e-33
VSTM4	10q11.23	4.53358e-33
BNIP3L	8p21.2	4.56533e-33
LRRC3B	3p24.1	4.56533e-33
BBIP1	10q25.2	4.70815e-33
RP11-834C11.4	-	4.81757e-33
NUDT12	5q21.2	4.86861e-33
MTUS1	8p22	5.14623e-33
PSMG3-AS1	7p22.3	5.54118e-33
FTSJ1	Xp11.23	5.7319e-33
ADRM1	20q13.33	5.78235e-33
HRASLS	3q29	5.84321e-33
FAM58A	-	5.91831e-33
DNAJC27	2p23.3	6.15764e-33
MED8	1p34.2	6.15764e-33
RP11-3B7.1	-	6.51098e-33
SLC19A1	21q22.3	6.54567e-33
RP11-96C23.5	-	6.97126e-33
RP11-456K23.1	-	7.03122e-33
MB21D1	-	7.06641e-33
MFSD12	19p13.3	7.37055e-33
EPDR1	7p14.1	7.57497e-33
AK5	1p31.1	8.31056e-33
CDK5	7q36.1	8.31056e-33
CLN6	15q23	8.98835e-33
PEX12	17q12	1.03161e-32
RHOU	1q42.13	1.04625e-32
ZIC1	3q24	1.05774e-32
SLC25A16	10q21.3	1.14976e-32
TBRG4	7p13	1.22048e-32
CTC-558O2.2	-	1.30062e-32
YWHAZ	8q22.3	1.31037e-32
ARPC5	1q25.3	1.3818e-32
PABPC5	Xq21.31	1.5576e-32
FAM189B	1q22	1.56291e-32
VIP	6q25.2	1.58854e-32
RPP25	15q24.2	1.77189e-32
GNG12	1p31.3	1.77291e-32
FAM175A	-	1.79576e-32
RAMP2	17q21.2	1.86197e-32
SLC48A1	12q13.11	1.88473e-32
ZNF132	19q13.4	1.9457e-32
HOXD-AS2	2q31.1	1.9902e-32
AC008268.1	-	2.03132e-32
NUDT4	12q22	2.05295e-32
AC073850.6	-	2.17441e-32
ZC3H3	8q24.3	2.29786e-32
GLT8D2	12q23.3	2.30809e-32
BLCAP	20q11.23	2.30833e-32
DOC2B	17p13.3	2.51222e-32
ENY2	8q23.1	2.51222e-32
RRP1	21q22.3	2.6237e-32
TMEM258	11q12.2	2.65199e-32
TRIM66	11p15.4	2.70595e-32
ACTA2-AS1	10q23.31	2.88576e-32
RPUSD1	16p13.3	2.94463e-32
CHAC2	2p16.2	2.99176e-32
AC018647.3	-	3.03705e-32
KIF13A	6p22.3	3.04616e-32
SLC35G2	3q22.3	3.08292e-32
LPAR1	9q31.3	3.1704e-32
RP11-777F6.3	-	3.29899e-32
LINC00886	3q25.31	3.49995e-32
PDCL3	2q11.2	3.50931e-32
DPYD	1p21.3	3.56986e-32
PPIB	15q22.31	3.85345e-32
EFCAB14	1p33	4.06666e-32
HES6	2q37.3	4.23061e-32
SNTB2	16q22.1	4.65373e-32
G0S2	1q32.2	4.67416e-32
SGCG	13q12.12	4.74911e-32
REEP5	5q22.2	4.8161e-32
MTBP	8q24.12	4.97567e-32
CLK4	5q35.3	5.15037e-32
SOX11	2p25.2	5.19181e-32
DNAJC2	7q22.1	5.39167e-32
PARVA	11p15.3	5.44161e-32
SEC61A1	3q21.3	5.5619e-32
TRMU	22q13.31	5.57017e-32
WISP1	8q24.22	5.81546e-32
CNIH4	1q42.11	5.9307e-32
TNFRSF9	1p36.23	5.9307e-32
SKP1	5q31.1	5.97689e-32
LINC00504	4p15.33	6.05202e-32
CX3CR1	3p22.2	6.1018e-32
STOM	9q33.2	6.57181e-32
AXIN2	17q24.1	7.05599e-32
SLAMF8	1q23.2	7.25443e-32
DCPS	11q24.2	7.42831e-32
RNPS1	16p13.3	7.62865e-32
PCK1	20q13.31	7.68302e-32
KDR	4q12	7.87486e-32
NRIP2	12p13.33	7.95824e-32
EFNA4	1q21.3	8.55937e-32
NDUFB9	8q24.13	8.66846e-32
PCDHB15	5q31.3	8.89582e-32
RP11-151D14.1	-	9.07905e-32
MYLIP	6p22.3	9.72113e-32
RPUSD3	3p25.3	9.72113e-32
EPHX2	8p21.2-p21.1	1.06435e-31
PSAT1	9q21.2	1.10154e-31
FAM228B	2p23.3	1.10376e-31
LINC00844	10q21.1	1.14788e-31
TMEM144	4q32.1	1.25214e-31
PIK3IP1	22q12.2	1.28183e-31
RP5-1024N4.4	-	1.3028e-31
ATG14	14q22.3	1.31831e-31
EMC8	16q24.1	1.37484e-31
ADIRF-AS1	10q23.2	1.45306e-31
AC004562.1	-	1.51807e-31
SCGB1D2	11q12.3	1.57181e-31
C18orf56	-	1.59434e-31
GIN1	5q21.1	1.59673e-31
CYP46A1	14q32.2	1.82886e-31
CDKN2D	19p13.2	1.84705e-31
TLR4	9q33.1	1.84736e-31
AMY2B	1p21.1	1.85656e-31
AC096772.6	-	1.8985e-31
GSK3A	19q13.2	2.07501e-31
FAM129A	1q25.3	2.09338e-31
CT62	15q23	2.18652e-31
PRR7	5q35.3	2.30931e-31
ALDH2	12q24.12	2.37431e-31
CITED2	6q24.1	2.41265e-31
SEMA7A	15q24.1	2.45622e-31
MASTL	10p12.1	2.48469e-31
PPP1R3C	10q23.32	2.48533e-31
AP001434.2	-	2.58244e-31
RP11-254F7.4	-	2.65135e-31
FTO	16q12.2	2.74799e-31
RP11-284B18.3	-	2.77788e-31
PPP4R1L	20q13.32	2.77906e-31
SSBP1	7q34	2.8365e-31
MRPS5	2q11.1	2.89413e-31
LINC00883	-	2.91544e-31
MAGOHB	12p13.2	2.91544e-31
CTC-559E9.4	-	2.92322e-31
TTC18	-	2.97502e-31
GNG5	1p22.3	2.99745e-31
PLEKHM1	17q21.31	3.02767e-31
ZNF204P	6p22.1	3.03778e-31
TPRG1-AS1	3q28	3.22352e-31
TMEM8A	16p13.3	3.40249e-31
SBF2	11p15.4	3.52599e-31
PGK1	Xq21.1	3.70769e-31
CTA-384D8.36	-	3.83048e-31
SLC35B1	17q21.33	3.86037e-31
DESI2	1q44	3.90468e-31
DCAF5	14q24.1	3.95939e-31
AHSA1	14q24.3	4.04144e-31
NDST1	5q33.1	4.11874e-31
CTDSP2	12q14.1	4.13243e-31
RP11-760H22.2	-	4.23884e-31
DCTPP1	16p11.2	4.43901e-31
RP11-677M14.5	-	4.62033e-31
PTMA	2q37.1	4.65423e-31
LINC00086	-	4.95414e-31
YPEL2	17q22	5.28552e-31
HIST1H2BJ	6p22.1	5.45856e-31
HMGCS2	1p12	5.51161e-31
B4GALT2	1p34.1	5.81213e-31
PDCD2L	19q13.11	6.23701e-31
AC011526.1	-	6.2944e-31
CYP2T2P	-	6.33723e-31
CTD-2536I1.1	-	6.35945e-31
CHTF18	16p13.3	6.87974e-31
RP11-582J16.5	-	7.03383e-31
PSMD2	3q27.1	7.03409e-31
TMEM147	19q13.12	7.14882e-31
ZNF442	19p13.2	7.17762e-31
RP11-229C3.2	-	7.61565e-31
POLR2K	8q22.2	7.67671e-31
RP11-553L6.5	-	8.11076e-31
ADD3	10q25.1-q25.2	9.02368e-31
ABCF1	6p21.33	9.1361e-31
PINLYP	19q13.31	9.25286e-31
DDX11-AS1	12p11.21	9.85854e-31
THBD	20p11.21	1.05937e-30
CTC-366B18.4	-	1.0728e-30
PSMD11	17q11.2	1.08557e-30
TNFSF12	17p13.1	1.10926e-30
KRTCAP2	1q22	1.14336e-30
ALDH1L1	3q21.3	1.16803e-30
LRRC2	3p21.31	1.25251e-30
LPAR2	19p12	1.31935e-30
GLUD1	10q23.2	1.40849e-30
MTCH2	11p11.2	1.43746e-30
RP11-67L2.2	-	1.47457e-30
ATP6V1F	7q32.1	1.51627e-30
USF1	1q23.3	1.63844e-30
PTGDR2	11q12.2	1.64158e-30
CDKN2A	9p21.3	1.64807e-30
SRP14-AS1	15q15.1	1.65713e-30
HOXA4	7p15.2	1.65945e-30
C14orf132	14q32.2	1.66011e-30
RHBDL2	1p34.3	1.67479e-30
GLRB	4q32.1	1.7358e-30
H2AFY	5q31.1	1.76948e-30
CTC-510F12.2	-	1.77267e-30
NDUFS4	5q11.2	1.79422e-30
SBK1	16p11.2	1.86321e-30
TSPAN33	7q32.1	1.8853e-30
TSC22D3	Xq22.3	1.94675e-30
CRTC2	1q21.3	1.95637e-30
RP11-517B11.7	-	1.97297e-30
RRS1	8q13.1	2.08676e-30
CCBE1	18q21.32	2.11378e-30
ACTR3	2q14.1	2.16812e-30
C19orf40	-	2.23232e-30
RHEB	7q36.1	2.26874e-30
ORMDL3	17q21.1	2.27232e-30
LDLRAD2	1p36.12	2.27489e-30
GPER1	7p22.3	2.42645e-30
CTF1	16p11.2	2.43915e-30
CTC-559E9.5	-	2.469e-30
ANKRD40	17q21.33	2.53684e-30
HEPACAM	11q24.2	2.54313e-30
ITPRIPL1	2q11.2	2.61509e-30
TIMM17B	Xp11.23	2.70972e-30
RP11-626H12.1	-	2.92997e-30
SNRPEP2	9p24.1	2.96667e-30
FBXO31	16q24.2	2.97817e-30
PPIH	1p34.2	2.97817e-30
S100A11	1q21.3	3.0744e-30
SDF2L1	22q11.21	3.10705e-30
FAM134B	-	3.27414e-30
PGPEP1	19p13.11	3.31398e-30
SSR2	1q22	3.31645e-30
EFCAB6	22q13.2-q13.31	3.59692e-30
NUDT7	16q23.1	3.6411e-30
RP11-126K1.2	-	3.69348e-30
AC079630.4	-	3.82014e-30
RP11-134K13.4	-	3.84879e-30
C1QTNF7	4p15.32	3.92585e-30
UBL3	13q12.3	4.02212e-30
DYNLRB2	16q23.2	4.13331e-30
TXNDC17	17p13.1	4.16869e-30
MRPS27	5q13.2	4.19916e-30
ADH5	4q23	4.36769e-30
NR2F1	5q15	4.54233e-30
RASSF9	12q21.31	4.8006e-30
CCT8	21q21.3	5.02945e-30
RPS6KB2	11q13.2	5.17179e-30
MTFP1	22q12.2	5.21769e-30
MIR27A	19p13.12	5.35682e-30
MED7	5q33.3	5.35916e-30
RP13-36G14.4	-	5.68125e-30
NOL10	2p25.1	5.68412e-30
WARS2-IT1	1p12	5.81665e-30
DEFB132	20p13	5.94557e-30
RP11-1260E13.4	-	5.99653e-30
C1orf43	1q21.3	6.41922e-30
DUSP6	12q21.33	6.51017e-30
GINS3	16q21	6.58719e-30
CTD-2263F21.1	-	6.69722e-30
HNRNPA2B1	7p15.2	6.76903e-30
RTN4R	22q11.21	6.76903e-30
CTD-2373J6.1	-	6.77332e-30
C1orf35	1q42.13	6.79412e-30
AQP7P1	9q13	7.14802e-30
FARSA	19p13.13	7.2582e-30
IRS2	13q34	7.47534e-30
PDGFRL	8p22	7.67058e-30
ASUN	-	7.74183e-30
GMDS	6p25.3	7.86346e-30
RP11-293M10.6	-	7.99004e-30
SRSF1	17q22	8.35392e-30
PYCRL	-	8.94285e-30
RPP21	6p22.1	9.15468e-30
FCHO2	5q13.2	9.17854e-30
FGF7	15q21.2	9.25163e-30
RBL2	16q12.2	9.29953e-30
GRASP	12q13.13	9.30496e-30
C1orf64	-	9.37784e-30
HADH	4q25	9.4592e-30
DBNDD1	16q24.3	1.01403e-29
RP11-299J3.8	-	1.09366e-29
SMIM10	Xq26.3	1.10309e-29
RP11-677M14.7	-	1.14415e-29
AC005740.6	-	1.15896e-29
YIF1A	11q13.2	1.17474e-29
TUBG1	17q21.31	1.28537e-29
C19orf48	19q13.33	1.30291e-29
AC093495.4	-	1.3608e-29
LINC00337	1p36.31	1.37683e-29
FBXL20	17q12	1.38348e-29
RHPN1-AS1	8q24.3	1.39188e-29
PARM1	4q13.3	1.39722e-29
IL20RA	6q23.3	1.44485e-29
CTB-33O18.2	-	1.44863e-29
NARF	17q25.3	1.49266e-29
PODXL2	3q21.3	1.50436e-29
ATP1B2	17p13.1	1.52485e-29
ISG15	1p36.33	1.56077e-29
TPPP3	16q22.1	1.59962e-29
MIR10B	2q31.1	1.66148e-29
VPS36	13q14.3	1.68291e-29
SMYD4	17p13.3	1.72907e-29
TOMM34	20q13.12	1.73973e-29
CCT6A	7p11.2	1.77963e-29
ANKDD1B	5q13.3	1.78378e-29
RP11-182I10.3	-	1.78698e-29
KNOP1	16p12.3	1.79298e-29
CD99L2	Xq28	1.87806e-29
AC002064.4	-	2.0032e-29
LINC00924	15q26.2	2.03821e-29
LRFN4	11q13.1	2.08763e-29
RP11-421P23.2	-	2.08891e-29
SLC25A30	13q14.13	2.27443e-29
TWIST2	2q37.3	2.3089e-29
BOLA3	2p13.1	2.44491e-29
MEG3	14q32.2	2.47976e-29
PHF5A	22q13.2	2.51721e-29
MMP9	20q13.12	2.54391e-29
GULP1	2q32.1-q32.2	2.67511e-29
TOMM5	9p13.2	2.67663e-29
PTGER4	5p13.1	2.69485e-29
ANXA1	9q21.13	2.72815e-29
ARL9	4q12	2.83912e-29
SH3RF2	5q32	2.87885e-29
RBP7	1p36.22	2.91994e-29
SCGB2A2	11q12.3	3.04983e-29
DDA1	19p13.11	3.10723e-29
LMBRD1	6q13	3.13844e-29
RAB11FIP2	10q26.11	3.19173e-29
EPB41L4A-AS1	5q22.1	3.19299e-29
CALU	7q32.1	3.42502e-29
RPL21P135	3p22.2	3.44053e-29
ACKR3	2q37.3	3.56402e-29
RP11-793H13.11	-	3.69636e-29
C1orf21	1q25.3	3.94949e-29
ZMYND19	9q34.3	4.05471e-29
MMP28	17q12	4.06995e-29
MBLAC2	5q14.3	4.07386e-29
NRM	6p21.33	4.15105e-29
RP11-561I11.3	-	4.19546e-29
GOLGA8R	15q13.2	4.21691e-29
RP11-566E18.3	-	4.31325e-29
FNIP1	5q31.1	4.36761e-29
CDKN1C	11p15.4	4.46736e-29
PLCD3	17q21.31	4.46736e-29
ZER1	9q34.11	4.49016e-29
SIRT3	11p15.5	4.63897e-29
PDE11A	2q31.2	4.64475e-29
RP11-22P6.3	-	4.81769e-29
PPIL1	6p21.2	4.88791e-29
GLRX2	1q31.2	4.98009e-29
NMU	4q12	5.04951e-29
RP1-302G2.5	-	5.08282e-29
RP11-549J18.1	-	5.31967e-29
TRHDE-AS1	12q21.1	5.32037e-29
F11R	1q23.3	5.7946e-29
ECHDC2	1p32.3	5.87205e-29
DDX49	19p13.11	5.9041e-29
NPHP3	3q22.1	6.12421e-29
EFCC1	3q21.3	6.85683e-29
AC112218.1	-	6.87116e-29
SMCO4	11q21	7.11757e-29
XXbac-BPGBPG55C20.2	-	7.24891e-29
MRPL51	12p13.31	7.27352e-29
GPR84	12q13.13	7.49938e-29
MYOC	1q24.3	7.6447e-29
MARCKSL1	1p35.1	7.65316e-29
RP11-295M18.2	-	8.06014e-29
SRC	20q11.23	8.11811e-29
EPRS	1q41	8.2415e-29
HOXC11	12q13.13	8.60047e-29
IDNK	9q21.32	8.94081e-29
MAGOH2	-	8.97438e-29
ZNF670	1q44	9.15795e-29
CTC-429P9.2	-	9.21798e-29
STRA13	-	9.39791e-29
RP11-958F21.1	-	9.59622e-29
MIR27B	9q22.32	9.84467e-29
KDELR2	7p22.1	9.86841e-29
GAL	11q13.2	9.97585e-29
AC097713.3	-	1.01648e-28
RP11-251M1.1	-	1.0347e-28
CRELD2	22q13.33	1.15535e-28
LINC00938	12q12	1.16702e-28
LINC00933	15q25.2	1.17834e-28
UFC1	1q23.3	1.20684e-28
RASGRF2	5q14.1	1.3644e-28
SLMO1	-	1.38128e-28
RP11-395N3.2	-	1.38415e-28
AC007743.1	-	1.39032e-28
UFD1L	-	1.40653e-28
IL1R1	2q11.2-q12.1	1.46445e-28
AC074286.1	-	1.52211e-28
RHEBL1	12q13.12	1.5744e-28
JAK1	1p31.3	1.61323e-28
PIGU	20q11.22	1.61323e-28
ATP5G1P4	-	1.62048e-28
GNAI1	7q21.11	1.63265e-28
PUS1	12q24.33	1.63629e-28
RP11-863K10.4	-	1.678e-28
MEA1	6p21.1	1.86082e-28
SLBP	4p16.3	1.9033e-28
RP11-100L22.1	-	1.96577e-28
RP11-446H18.1	-	2.02275e-28
PGP	16p13.3	2.08321e-28
ESD	13q14.2	2.14013e-28
RP3-512B11.3	-	2.2046e-28
SIAE	11q24	2.21378e-28
RP11-632K20.7	-	2.21691e-28
NR2F6	19p13.11	2.26157e-28
OXCT1-AS1	5p13.1	2.27909e-28
R3HDM1	2q21.3	2.30853e-28
CTD-2623N2.3	-	2.39922e-28
FAM57A	17p13.3	2.43134e-28
E2F5	8q21.2	2.54065e-28
CRHBP	5q13.3	2.70271e-28
CNTNAP3B	9p11.2	2.73779e-28
GTF2IRD1	7q11.23	2.76098e-28
SNRPD3	22q11.23	2.8545e-28
GS1-124K5.11	-	2.85532e-28
ANAPC11	17q25.3	2.90885e-28
RN7SL314P	10p11.21	2.92501e-28
PGGT1B	5q22.3	2.974e-28
CCND2-AS1	12p13.32	3.09355e-28
FBXO43	8q22.2	3.38021e-28
PTPRM	18p11.23	3.41019e-28
ACSS3	12q21.31	3.6104e-28
SNRPF	12q23.1	3.67104e-28
XPC	3p25.1	3.90223e-28
RP11-2E11.9	-	3.90713e-28
FAM126A	7p15.3	3.96247e-28
RP4-631H13.6	-	3.98954e-28
RP11-159N11.4	-	4.02552e-28
AUP1	2p13.1	4.2587e-28
THOC6	16p13.3	4.42792e-28
CHAD	17q21.33	4.61307e-28
PBLD	10q21.3	4.64263e-28
MEF2C-AS1	5q14.3	4.70595e-28
RBM38	20q13.31	4.85396e-28
ZNF471	19q13.43	4.85396e-28
ATP5S	14q21.3	4.91776e-28
MXD3	5q35.3	5.08176e-28
RPS23P1	8q22.1	5.39357e-28
DDOST	1p36.12	5.4083e-28
RP11-262D11.2	-	5.41447e-28
FDPS	1q22	5.5372e-28
AP001189.4	-	5.71129e-28
TIPRL	1q24.2	5.80499e-28
SAYSD1	6p21.2	5.92095e-28
RGMB	5q15	5.97955e-28
BDH2	4q24	6.21269e-28
NOP16	5q35.2	6.41576e-28
RP11-983P16.4	-	6.53897e-28
RP11-819C21.1	-	6.59217e-28
WASF3	13q12.13	6.67203e-28
DNPH1	6p21.1	6.67987e-28
FAM72D	1q21.1	6.70688e-28
KLF10	8q22.3	6.70688e-28
RBPMS-AS1	8p12	6.88965e-28
RP11-211G3.2	-	7.04264e-28
POGK	1q24.1	7.09603e-28
C4orf46	4q32.1	7.15755e-28
TMEM158	3p21.31	7.24103e-28
FSCN1	7p22.1	7.35342e-28
P2RY6	11q13.4	7.86003e-28
H6PD	1p36.22	7.93039e-28
CHST7	Xp11.3	8.05895e-28
RP11-820L6.1	-	8.23532e-28
KIAA1199	-	8.24819e-28
SLC25A22	11p15.5	8.34508e-28
MGAT4B	5q35.3	8.68026e-28
WDR86	7q36.1	8.85528e-28
HSF1	8q24.3	8.96814e-28
TMEM79	1q22	9.05107e-28
2019-03-01	1q41	9.07708e-28
RPN2	20q11.23	9.11106e-28
TP53AIP1	11q24.3	9.14006e-28
TMEM9B-AS1	11p15.4	9.18092e-28
RP1-193H18.2	-	9.33947e-28
CARM1	19p13.2	9.39623e-28
CD276	15q24.1	9.71577e-28
TRIM65	17q25.1	9.75976e-28
TMEM150C	4q21.22	9.96853e-28
SF3B14	-	1.00201e-27
RERG	12p12.3	1.04169e-27
POLN	4p16.3	1.04729e-27
ST20	15q25.1	1.04761e-27
CCNG2	4q21.1	1.04869e-27
SMIM3	5q33.1	1.12056e-27
AQPEP	-	1.15159e-27
SAR1B	5q31.1	1.16854e-27
LSM7	19p13.3	1.17191e-27
SPATA33	16q24.3	1.17493e-27
RP11-730A19.5	-	1.1752e-27
RP1-199J3.5	-	1.19828e-27
TMEM54	1p35.1	1.2228e-27
WDR34	9q34.11	1.28104e-27
MTFR1	8q13.1	1.29634e-27
RP11-137L10.6	-	1.31882e-27
AP2S1	19q13.32	1.33445e-27
ZFP36L2	2p21	1.34531e-27
RPIA	2p11.2	1.34761e-27
C1QTNF6	22q12.3	1.36114e-27
RNU5B-4P	5q31.2	1.44605e-27
RP11-902B17.1	-	1.45632e-27
PCDHB4	5q31.3	1.45849e-27
HSPB2	11q23.1	1.56323e-27
RP11-650L12.2	-	1.56324e-27
RP4-792G4.2	-	1.56371e-27
TSEN54	17q25.1	1.56898e-27
FAM196B	5q35.1	1.5719e-27
PRCD	17q25.1	1.58121e-27
RP11-798K3.2	-	1.66044e-27
RP11-311H10.4	-	1.67649e-27
USB1	16q21	1.79094e-27
C2orf48	2p25.1	1.92162e-27
NGFR	17q21.33	1.933e-27
NUDT16P1	3q22.1	2.0056e-27
TRBV26OR9-2	9p13.3	2.1109e-27
AOC4P	17q21.31	2.12217e-27
LAD1	1q32.1	2.14352e-27
TMPO	12q23.1	2.14638e-27
GREM2	1q43	2.14847e-27
GINM1	6q25.1	2.19484e-27
PAICS	4q12	2.20353e-27
CTB-66B24.1	-	2.22413e-27
MGARP	4q31.1	2.24925e-27
BBS10	12q21.2	2.28225e-27
ASB8	12q13.11	2.2847e-27
NCS1	9q34.11	2.28849e-27
TIMMDC1	3q13.33	2.30915e-27
RP11-500C11.3	-	2.36166e-27
IBSP	4q22.1	2.37918e-27
GPN1	2p23.3	2.4185e-27
DCTN4	5q33.1	2.48686e-27
LMO2	11p13	2.53458e-27
C5orf34	5p12	2.69695e-27
CHL1-AS1	3p26.3	2.74163e-27
GYPC	2q14.3	2.83194e-27
RP11-748H22.1	-	2.87107e-27
CLPB	11q13.4	3.10874e-27
RBM5	3p21.31	3.14126e-27
RP1-12G14.7	-	3.18849e-27
RP11-344B5.2	-	3.22862e-27
TUBBP1	8p12	3.2402e-27
NEGR1	1p31.1	3.2833e-27
ARSG	17q24.2	3.33382e-27
CTC-429P9.1	-	3.33382e-27
HYAL1	3p21.31	3.34103e-27
ODF3L1	15q24.2	3.40563e-27
RERG-IT1	12p12.3	3.45054e-27
RP11-800A3.7	-	3.46161e-27
FBXO38	5q32	3.61056e-27
RP11-182J1.1	-	3.65361e-27
ACO1	9p21.1	3.66423e-27
CLK1	2q33.1	3.73253e-27
CCDC64	-	3.75787e-27
NPR2	9p13.3	3.91702e-27
CYP4F22	19p13.12	4.01472e-27
WDYHV1	8q24.13	4.24696e-27
YBX1	1p34.2	4.26078e-27
NHLRC3	13q13.3	4.26442e-27
SMG7	1q25.3	4.26942e-27
CT83	Xq23	4.2946e-27
PMF1	1q22	4.42878e-27
SLC6A11	3p25.3	4.60007e-27
ZNF672	1q44	4.63403e-27
TEX30	13q33.1	4.69767e-27
RP11-693N9.2	-	5.14502e-27
RP11-295G20.2	-	5.18394e-27
FBXO36	2q36.3	5.26456e-27
CCDC80	3q13.2	5.35046e-27
CSTB	21q22.3	6.43234e-27
MTX1	1q22	6.57269e-27
RP11-84G21.1	-	6.59387e-27
GLIPR1L1	12q21.2	6.90338e-27
HYLS1	11q24.2	6.96888e-27
CYP2A6	19q13.2	6.9951e-27
CASP3	4q35.1	7.07001e-27
POLR1C	6p21.1	8.34227e-27
RP11-644F5.10	-	8.4864e-27
RP11-307C18.1	-	8.71156e-27
CCDC176	-	8.79053e-27
ACRV1	11q24.2	8.79672e-27
ABHD12	20p11.21	8.88342e-27
RP11-19E11.1	-	8.9787e-27
BRIX1	5p13.2	9.1102e-27
CAST	5q15	9.20454e-27
UBE2B	5q31.1	9.21826e-27
SAA1	11p15.1	9.27276e-27
EN1	2q14.2	9.4097e-27
LAMTOR2	1q22	9.7006e-27
MFI2-AS1	-	9.7655e-27
GGCT	7p14.3	1.01342e-26
CTD-2541J13.1	-	1.02337e-26
SNRPA	19q13.1	1.06035e-26
RHBDD3	22q12.2	1.10675e-26
KLHL10	17q21.2	1.11279e-26
PUS7	7q22.3	1.16585e-26
RP11-115H18.1	-	1.18546e-26
CDC14A	1p21.2	1.23233e-26
POLR2M	15q21.3	1.26149e-26
EMX2OS	10q26.11	1.28691e-26
IQUB	7q31.32	1.29874e-26
TMEM5-AS1	-	1.29874e-26
CTB-161M19.4	-	1.33481e-26
FAM47E-STBD1	4q21.1	1.34259e-26
ARL4A	7p21.3	1.34501e-26
ABCD4	14q24.3	1.37098e-26
RP11-470P21.2	-	1.39328e-26
PCDHGC3	5q31.3	1.39409e-26
RP11-672A2.4	-	1.42387e-26
CXCL9	4q21.1	1.43523e-26
PAPD4	5q14.1	1.4599e-26
RAD51-AS1	15q15.1	1.48126e-26
RP11-126K1.6	-	1.49879e-26
CHRD	3q27.1	1.5047e-26
RP11-116B13.1	-	1.53554e-26
ASAH1	8p22	1.57073e-26
FAM127B	-	1.62056e-26
RNF187	1q42.13	1.63432e-26
HSD17B10	Xp11.22	1.70727e-26
RASL11A	13q12.2	1.70789e-26
RP11-999E24.3	-	1.7806e-26
MIR3671	1p31.3	1.78112e-26
KREMEN2	16p13.3	1.81855e-26
CAMLG	5q31.1	1.82755e-26
ANKRD53	2p13.3	1.83219e-26
CDK8	13q12.13	1.85328e-26
HMGB3P10	1p21.2	1.87231e-26
SIRT7	17q25.3	1.90488e-26
CHPF	2q35	1.92374e-26
IL21R	16p12.1	1.92636e-26
RBX1	22q13.2	1.9406e-26
OSTC	4q25	1.96543e-26
RP11-307L14.1	-	2.02572e-26
DEDD	1q23.3	2.06964e-26
AVPR1A	12q14.2	2.07039e-26
SSTR1	14q13	2.07095e-26
RP11-634H22.1	-	2.12787e-26
UBXN10	1p36.12	2.14195e-26
YIPF2	19p13.2	2.16143e-26
NPY2R	4q32.1	2.20091e-26
POLR2J	7q22.1	2.20458e-26
SMOX	20p13	2.211e-26
ZNF843	16p11.2	2.2244e-26
GAS7	17p13.1	2.33987e-26
EDA	Xq13.1	2.34435e-26
CA12	15q22.2	2.35611e-26
AC002117.1	-	2.37978e-26
DNAJC9-AS1	10q22.2	2.39011e-26
FEZ2	2p22.2	2.54894e-26
CTD-2135J3.3	-	2.67851e-26
TSC1	9q34	2.68467e-26
AK3	9p24.1	2.79826e-26
CNTFR	9p13.3	2.84409e-26
DEPDC7	11p13	2.84609e-26
ZBTB47	3p22.1	2.90717e-26
KRT222	17q21.2	2.91043e-26
SKAP2	7p15.2	2.94416e-26
LIPE-AS1	19q13.2	2.95968e-26
SCO2	22q13.33	2.99559e-26
COMMD5	8q24.3	3.01412e-26
LYPD6	2q23.2	3.04479e-26
APEX2	Xp11.21	3.08566e-26
HAGHL	16p13.3	3.09643e-26
SREK1IP1	5q12.3	3.13742e-26
NME5	5q31.2	3.16504e-26
ZNF483	9q31.3	3.20601e-26
FNIP2	4q32.1	3.24297e-26
IER5L	9q34.11	3.29973e-26
ACSL1	4q35.1	3.33963e-26
COLEC12	18p11.32	3.40506e-26
RNF141	11p15.3	3.40948e-26
ARPC4	3p25.3	3.64155e-26
FAM117A	17q21.33	3.65575e-26
RP11-345J4.5	-	3.68205e-26
CYC1	8q24.3	3.80783e-26
CTD-2521M24.11	-	3.89036e-26
MIR573	4p15.2	4.08674e-26
TMEM208	16q22.1	4.17811e-26
GS1-279B7.2	-	4.314e-26
ARPC1B	7q22.1	4.31521e-26
MXI1	10q25.2	4.39653e-26
TFR2	7q22.1	4.39653e-26
AC093668.3	-	4.43087e-26
PUF60	8q24.3	4.4675e-26
GAB1	4q31.21	4.66219e-26
ZNF582-AS1	19q13.43	4.68112e-26
DTWD2	5q23.1	4.71847e-26
TMSB15A	Xq22.1	4.79874e-26
PTPN13	4q21.3	4.96463e-26
CHRAC1	8q24.3	5.0793e-26
MED13L	12q24.21	5.38419e-26
SMIM14	4p14	5.41709e-26
ABHD1	2p23.3	5.43175e-26
AC135178.7	-	5.43175e-26
HSPA5	9q33.3	5.4477e-26
RP11-834C11.8	-	5.49382e-26
TMEM189	20q13.13	5.6109e-26
ERAP1	5q15	5.66361e-26
PRKAR2B	7q22.3	5.66361e-26
C10orf54	-	6.04374e-26
RP13-1016M1.2	-	6.09127e-26
TMEM81	1q32.1	6.30136e-26
SLC25A27	6p12.3	6.60178e-26
VN1R53P	10p11.21	6.66783e-26
RP11-830F9.6	-	6.77999e-26
LYAR	4p16.3	6.8392e-26
UST	6q25.1	6.89132e-26
C16orf52	-	7.01476e-26
RAE1	20q13.31	7.01476e-26
FAM89B	11q13.1	7.01512e-26
CILP2	19p13.11	7.06351e-26
TSEN34	19q13.42	7.11787e-26
C2CD4D	1q21.3	7.26256e-26
RP11-723D22.3	-	7.36711e-26
AF131215.2	-	7.42354e-26
SPP1	4q22.1	7.51562e-26
CTU2	16q24.3	7.84359e-26
RP11-564D11.3	-	8.17825e-26
RP11-92A5.2	-	8.28123e-26
SNORA2	-	9.01023e-26
MDH2	7q11.23	9.10712e-26
SLC7A4	22q11.21	9.43507e-26
CCL11	17q12	9.51739e-26
COMP	19p13.11	9.51739e-26
RBMXP4	4q25	9.90467e-26
RAB8A	19p13.11	1.02504e-25
RP11-480I12.5	-	1.03467e-25
RP5-1021I20.1	-	1.05665e-25
COA4	11q13.4	1.0579e-25
BUD31	7q22.1	1.06247e-25
CTB-92J24.3	-	1.09225e-25
DYNLL1	12q24.31	1.0929e-25
AC020907.1	-	1.09373e-25
MMP13	11q22.2	1.13146e-25
CITED1	Xq13.1	1.14101e-25
DUSP3	17q21.31	1.17925e-25
AC092155.4	-	1.19505e-25
LPP-AS2	3q27.3	1.19505e-25
CLCN2	3q27.1	1.19589e-25
WDR46	6p21.32	1.20388e-25
RP11-22C11.2	-	1.23963e-25
UTP11L	-	1.258e-25
TAP1	6p21.32	1.26714e-25
KIAA1107	1p22.1	1.27545e-25
AC005355.2	-	1.29252e-25
HORMAD1	1q21.3	1.30691e-25
HSPD1	2q33.1	1.30949e-25
PTGR1	9q31.3	1.36325e-25
RP11-783K16.5	-	1.37858e-25
MPV17L2	19p13.11	1.38665e-25
RP11-111F16.2	-	1.39312e-25
NUP210	3p25.1	1.41861e-25
RPL26L1	5q35.1	1.45297e-25
NAA10	Xq28	1.45845e-25
MTERFD2	-	1.47529e-25
NKIRAS1	3p24.2	1.48508e-25
PDLIM1	10q23.33	1.52219e-25
MRPL11	11q13.2	1.53029e-25
ELANE	19p13.3	1.55699e-25
MOCS2	5q11.2	1.58674e-25
FMO5	1q21.1	1.66574e-25
WBP4	13q14.11	1.69368e-25
C2CD2	21q22.3	1.69635e-25
ARHGAP39	8q24.3	1.71281e-25
PTENP1	9p13.3	1.77862e-25
CTC-339F2.2	-	1.83548e-25
C19orf10	-	1.86085e-25
CTC-429P9.3	-	1.96945e-25
IGFBP4	17q21.2	1.97778e-25
TXN	9q31.3	1.99306e-25
GIPC1	19p13.12	2.00068e-25
HOXA2	7p15.2	2.03272e-25
PNKD	2q35	2.06416e-25
PLEKHO1	1q21.2	2.06853e-25
CCL21	9p13.3	2.10785e-25
CPSF3	2p25.1	2.14704e-25
RBM8A	1q21.1	2.17897e-25
RP11-400N13.3	-	2.18944e-25
OCIAD2	4p11	2.34428e-25
RP11-298C3.2	-	2.38565e-25
RP11-834C11.7	-	2.40349e-25
FGF13-AS1	Xq26.3	2.4249e-25
VRK1	14q32.2	2.44264e-25
RP11-696F12.1	-	2.45109e-25
NAP1L5	4q22.1	2.53808e-25
UBL4A	Xq28	2.54863e-25
RP11-689P11.2	-	2.56329e-25
ZNF763	19p13.2	2.58037e-25
SPATA4	4q34.2	2.5994e-25
LCN6	9q34.3	2.64491e-25
RNASEL	1q25.3	2.842e-25
AC010226.4	-	2.86478e-25
ZNF124	1q44	2.93012e-25
STX1B	16p11.2	2.97234e-25
HOXD9	2q31.1	3.00551e-25
MEX3D	19p13.3	3.09851e-25
RP11-1101K5.1	-	3.18539e-25
HEATR3	16q12.1	3.21447e-25
PTP4A3	8q24.3	3.22752e-25
CTD-2366F13.2	-	3.26067e-25
SLC7A10	19q13.11	3.28231e-25
FOXRED2	22q12.3	3.39387e-25
MIF	22q11.23	3.40576e-25
APOLD1	12p13.1	3.41834e-25
IVD	15q15.1	3.44675e-25
RP4-758J18.13	-	3.50454e-25
C22orf39	22q11.21	3.59131e-25
LOC100421166	-	3.92728e-25
KCNK5	6p21.2	4.52671e-25
TAPBP	6p21.32	4.69802e-25
CYP4F29P	21q11.2	4.75318e-25
RGN	Xp11.3	4.83865e-25
B3GNT1	-	5.07703e-25
RFX5	1q21.3	5.26968e-25
ABCD2	12q12	5.38052e-25
CTC-548K16.1	-	5.41331e-25
MTMR9	8p23.1	5.42818e-25
SIM2	21q22.13	5.44142e-25
MTERFD3	-	5.48455e-25
RP11-475B2.1	-	5.57271e-25
RP11-967K21.1	-	5.58604e-25
LINC01128	1p36.33	5.61639e-25
SUMO3	21q22.3	5.89404e-25
RP3-400B16.1	-	5.89646e-25
RUVBL2	19q13.33	5.97407e-25
UBE2V2	8q11.21	5.98448e-25
SLC16A4	1p13.3	6.0724e-25
FCER1A	1q23.2	6.21378e-25
RP11-863P13.3	-	6.37166e-25
ZNF214	11p15.4	6.60987e-25
SPAG8	9p13.3	6.71667e-25
RP11-73M18.7	-	6.92797e-25
ZHX1-C8ORF76	-	7.03903e-25
RP11-121M22.1	-	7.24541e-25
CABP1	12q24.31	7.32937e-25
ARHGEF37	5q32	7.3953e-25
RNU6-242P	2p21	7.50288e-25
NCBP2-AS2	3q29	7.55059e-25
HLA-AS1	-	7.60318e-25
CTC-429P9.5	-	7.74801e-25
MASP1	3q27.3	7.74801e-25
LINC00671	17q21.31	7.74948e-25
NSA2	5q13.3	7.75677e-25
U2AF2	19q13.43	7.9627e-25
LRRC61	7q36.1	7.96872e-25
BBS4	15q24.1	8.0664e-25
DYNLT1	6q25.3	8.07731e-25
PCOLCE2	3q23	8.23491e-25
HAS3	16q22.1	8.30718e-25
LINC00667	18p11.31	8.31968e-25
ARF5	7q32.1	9.13908e-25
PLK1S1	-	9.13908e-25
MRPL36	5p15.33	9.1723e-25
KDELR3	22q13.1	9.34994e-25
ABCF2	7q36.1	9.57821e-25
HIST1H3D	6p22.2	9.8039e-25
WRNIP1	6p25.2	9.84375e-25
RP11-214N9.1	-	9.91662e-25
TFF3	21q22.3	9.97598e-25
SCT	11p15.5	9.99305e-25
PIP	7q34	1.00232e-24
CNPY3	6p21.1	1.00294e-24
C5	9q33.2	1.02566e-24
SNRNP25	16p13.3	1.02575e-24
MYOCD	17p12	1.02781e-24
RP11-305L7.6	-	1.0394e-24
TBC1D10B	16p11.2	1.0394e-24
RP1-86C11.7	-	1.06346e-24
NCOA4	10q11.22	1.07751e-24
PEX19	1q23.2	1.08195e-24
ATF3	1q32.3	1.11312e-24
S100P	4p16.1	1.13665e-24
DCBLD1	6q22.1	1.14344e-24
MAST4-AS1	5q12.3	1.15878e-24
C7orf73	-	1.1597e-24
ADAL	15q15.3	1.17892e-24
RP11-213G2.2	-	1.1902e-24
C1orf213	-	1.20132e-24
MIRLET7D	9q22.32	1.20466e-24
LINC00271	6q23.3	1.21142e-24
ATP5C1	-	1.22273e-24
TM4SF18	3q25.1	1.23805e-24
ZNF662	3p22.1	1.24724e-24
RP11-295M18.6	-	1.27147e-24
PES1	22q12.2	1.29699e-24
LEPRE1	-	1.30527e-24
CTDSP1	2q35	1.35569e-24
PPM1A	14q23.1	1.35838e-24
TRIM8	10q24.32	1.36645e-24
VGLL3	3p12.1	1.45123e-24
RNF8	6p21.2	1.45223e-24
CMSS1	3q12.1	1.46676e-24
BHMT2	5q14.1	1.47977e-24
TMEM97	17q11.2	1.50987e-24
RP11-774O3.3	-	1.52653e-24
AC079776.2	-	1.54429e-24
RP11-617D20.1	-	1.61031e-24
PTS	11q22.3	1.61827e-24
AP001627.1	-	1.62501e-24
RP11-244H3.1	-	1.64891e-24
RP1-193H18.3	-	1.65505e-24
MIR221	Xp11.3	1.70261e-24
RP11-678G14.3	-	1.77729e-24
PRMT1	19q13.33	1.78152e-24
HIF1AN	10q24.31	1.80864e-24
CHIC1	Xq13.2	1.83368e-24
PDLIM3	4q35.1	1.83946e-24
PRDM8	4q21.21	1.91042e-24
NCLN	19p13.3	1.93973e-24
KANK1	9p24.3	1.98664e-24
NFKBIB	19q13.1	2.01437e-24
TMED9	5q35.3	2.05381e-24
MTX1P1	1q22	2.06537e-24
NDUFB2-AS1	7q34	2.17245e-24
RP11-324O2.3	-	2.17611e-24
SYNJ2BP-COX16	14q24.2	2.22021e-24
RGCC	13q14.11	2.25836e-24
C6orf99	6q25.3	2.26902e-24
SLC25A5	Xq24	2.34457e-24
FEZ1	11q24.2	2.35552e-24
MYL9	20q11.23	2.40241e-24
RP11-104L21.2	-	2.40402e-24
ERO1LB	-	2.44438e-24
TMEM66	-	2.44459e-24
TCF4	18q21.2	2.55592e-24
ZNRD1	6p22.1	2.6035e-24
VANGL1	1p13.1	2.68684e-24
RP5-1180C10.2	-	2.70371e-24
GEMIN8P4	1p22.2	2.70981e-24
SDS	12q24.13	2.79623e-24
NXNL1	19p13.11	2.86408e-24
HACL1	3p25.1	2.90529e-24
C19orf80	-	2.91652e-24
CCT7	2p13.2	2.94278e-24
FAM174A	5q21.1	3.00168e-24
TDO2	4q32.1	3.03671e-24
CTD-2647L4.4	-	3.09785e-24
CCR8	3p22.1	3.12865e-24
CAMK1	3p25.3	3.14783e-24
GBP5	1p22.2	3.17266e-24
PIGV	1p36.11	3.17266e-24
ARRDC3	5q14.3	3.18677e-24
TFB2M	1q44	3.18831e-24
NMI	2q23.3	3.19743e-24
ZBED4	22q13.33	3.19743e-24
RCCD1	15q26.1	3.38347e-24
STOML2	9p13.3	3.49957e-24
TRIM68	11p15.4	3.62353e-24
PGRMC2	4q28.2	3.66019e-24
TMEM183A	1q32.1	3.78737e-24
FAM212B	1p13.2	3.87732e-24
RIBC2	22q13.31	4.00576e-24
SLC22A5	5q31.1	4.01579e-24
GPS1	17q25.3	4.14854e-24
SLC9A9	3q24	4.16617e-24
RP11-132A1.4	-	4.33583e-24
OVCH2	11p15.4	4.37186e-24
IFI6	1p35.3	4.40696e-24
CMBL	5p15.2	4.43759e-24
MT1M	16q13	4.51935e-24
RFX2	19p13.3	4.66078e-24
RP11-701H24.7	-	4.84468e-24
KTI12	1p32.3	4.878e-24
KIAA1143	3p21.31	4.88703e-24
SNX9	6q25.3	4.9193e-24
MIR4435-1HG	-	5.10239e-24
RP11-864I4.3	-	5.14115e-24
ATF5	19q13.33	5.19312e-24
AKAP11	13q14.11	5.23868e-24
HPGDS	4q22.3	5.40977e-24
RP11-390E23.6	-	5.56235e-24
RP11-932O9.10	-	5.69048e-24
LINC00665	19q13.12	5.8002e-24
NDUFAB1	16p12.2	5.87076e-24
RP11-57A19.2	-	5.87076e-24
MAP2K5	15q23	5.96411e-24
RP11-228B15.4	-	6.00501e-24
RP5-1070G24.2	-	6.07616e-24
GMIP	19p13.11	6.08552e-24
THOC3	5q35.2	6.31286e-24
INPP1	2q32.2	6.35301e-24
MAN1C1	1p36.11	6.35561e-24
NSMCE2	8q24.13	6.40174e-24
RP11-359E3.4	-	6.4061e-24
CTD-2224J9.8	-	6.47722e-24
RPS18P9	6q25.1	6.65284e-24
AC007246.3	-	6.70278e-24
SKA2	17q23.2	6.7618e-24
RP11-54A9.1	-	6.76725e-24
GOLGA8M	15q13.1	6.84646e-24
ENO1	1p36.23	6.983e-24
SUGT1P	-	7.00815e-24
RP13-514E23.1	-	7.28637e-24
PISD	22q12.2	7.30732e-24
ATIC	2q35	7.31782e-24
NAT14	19q13.42	7.36349e-24
AC011738.4	-	7.48323e-24
ME2	18q21.2	7.7204e-24
CYP4V2	4q35.1-q35.2	7.77561e-24
DPM2	9q34.11	8.1352e-24
KLF1	19p13.13	8.16466e-24
RP11-412D9.4	-	8.1893e-24
CHST6	16q23.1	8.45033e-24
RFC3	13q13.2	8.55513e-24
PPIA	7p13	8.72373e-24
RP11-465N4.4	-	8.90496e-24
PDIA3	15q15.3	9.18959e-24
RP11-435O5.2	-	9.22494e-24
RP11-505K9.4	-	9.22494e-24
KCNK1	1q42.2	9.40098e-24
PHKG2	16p11.2	9.46247e-24
RP11-332E3.2	-	9.79982e-24
BPNT1	1q41	9.82002e-24
TOMM22	22q13.1	1.02703e-23
DCDC2	6p22.3	1.05119e-23
AC005154.7	-	1.07149e-23
ADPRM	17p13.1	1.09692e-23
DACT2	6q27	1.14279e-23
SBDS	7q11.21	1.16019e-23
MEMO1P1	21q22.12	1.16476e-23
NRN1	6p25.1	1.17734e-23
TMED3	15q25.1	1.17742e-23
RTCA	1p21.2	1.18028e-23
MIR23B	9q22.32	1.19481e-23
RP11-115D19.1	-	1.19558e-23
LINC00989	4q21.21	1.20573e-23
EFCAB1	8q11.21	1.21027e-23
MUCL1	12q13.2	1.22961e-23
RP11-787I22.3	-	1.24856e-23
STX1A	7q11.23	1.28123e-23
ALDOC	17q11.2	1.28544e-23
RP11-5C23.2	-	1.28961e-23
SUCLG2	3p14.1	1.3683e-23
SH3GL1	19p13.3	1.38781e-23
RP11-250B2.5	-	1.4129e-23
CCL28	5p12	1.4374e-23
RAB3C	5q11.2	1.47021e-23
[truncated: 15,468 more rows]
