# Supplementary material for: Integrating Germline and Somatic Mutation Information for the Discovery of Biomarkers in Triple-Negative Breast Cancer
Source: Int J Environ Res Public Health. 2019 Mar 23;16(6):1055. doi: 10.3390/ijerph16061055 (PMC6466377; doi:10.3390/ijerph16061055)
Supplement: Supplementary file 1 [file ijerph-16-01055-s001.zip › JIANDE-TNBC-TABLE S4A-SUBMITTED-14FEB.xlsx]

## Sheet: 07.TNBC.99.DE.nonGem.Som3.comm.
Table S4A. List of the 99 somatic mutated genes significantly associated with TNBC using Figure 4 along with their estimates of P-Values and number of somatic mutation events
Genes Name	Chromosome position	logFC	Adjusted expression P-value	Somatic mutation events
ABCA10	17q24.3	-1.56935	4.60584e-72	3
ABCA6	17q24.2-q24.3	-1.47361	2.33854e-58	3
ABCA9	17q24.2	-2.33058	7.96543e-68	3
AHNAK	11q12.3	-2.63018	2.29168e-61	6
ALOX15B	17p13.1	-1.48367	3.35593e-07	3
ANK2	4q25-q26	-1.38847	1.32255e-41	4
ANKRD30A	10p11.21	-2.08226	4.07474e-31	5
ASPM	1q31.3	2.2928	3.26788e-68	7
ATP1A2	1q23.2	-2.95323	9.91932e-56	3
ATP2B4	1q32.1	-1.01991	1.58503e-20	3
B4GALNT4	11p15.5	1.44347	2.78174e-23	3
CA9	9p13.3	2.28106	6.52388e-25	3
CENPE	4q24	1.65686	2.29031e-60	6
CMYA5	5q14.1	-1.65972	4.54536e-30	3
CNTN1	12q12	-1.13892	7.56986e-19	3
COL14A1	8q24.12	-2.74899	1.13178e-43	3
COL5A1	9q34.3	1.2615	5.747e-15	4
COL6A6	3q22.1	-1.4552	7.47241e-47	4
COPE	19p13.11	1.04188	1.77891e-28	3
CYBRD1	2q31.1	-2.77162	3.68874e-61	3
DLC1	8p22	-1.71277	5.37441e-37	5
DMXL1	5q23.1	-1.08045	7.3258e-40	3
DOCK11	Xq24	-1.41845	1.5832e-20	3
DST	6p12.1	-2.38271	1.88211e-50	8
DYNC2H1	11q22.3	-1.04475	9.12307e-39	4
ELTD1/ADGRL4	1p31.1	-1.86399	9.77951e-42	3
EPB41L2	6q23.1-q23.2	-1.01234	3.87315e-18	3
EPHB3	3q27.1	1.55861	1.5102e-13	4
FADS2	11q12.2	1.73002	4.03054e-20	3
FANCD2	3p25.3	1.11046	3.04991e-38	3
FANCI	15q26.1	1.74466	1.04308e-53	4
FGD5	3p25.1	-1.19885	1.88378e-28	4
FLNC	7q32.1	-1.25525	5.75005e-21	3
FREM1	9p22.3	-1.4095	1.76507e-47	5
FRMD6	14q22.1	-1.32956	3.54622e-28	3
GYG2	Xp22.33	-2.85532	5.42417e-32	4
HSPA12A	10q25.3	-1.50584	2.99304e-29	5
HSPG2	1p36.12	-1.04234	1.04825e-11	5
IGSF10	3q25.1	-1.60174	2.62554e-38	6
IKBKE	1q32.1	1.13998	7.62843e-24	3
IL6ST	5q11.2	-2.36366	4.09382e-63	3
IMPA2	18p11.21	1.16785	1.75449e-21	3
INMT	7p14.3	-2.11442	1.49694e-58	3
IQGAP2	5q13.3	-1.4501	3.63672e-23	4
IQGAP3	1q22	2.83865	3.35037e-71	4
ITGB2	21q22.3	1.03042	5.36618e-12	3
KCND3	1p13.2	-1.55497	2.46414e-43	3
KCNMA1	10q22.3	-1.08963	2.20586e-22	3
KIF26B	1q44	1.19194	9.80238e-26	6
KIF4A	Xq13.1	2.93294	1.86555e-83	4
KIFC1	6p21.32	3.24627	2.93738e-84	3
KPNA2	17q24.2	2.52739	2.1904e-68	3
LAMA2	6q22.33	-2.26267	3.34891e-54	4
LAMA3	18q11.2	-2.34956	3.55326e-41	6
LGR4	11p14.1	-1.09987	1.8059e-21	3
LRP1	12q13.3	-1.87633	5.48628e-33	6
LRP2	2q31.1	-1.43181	1.31843e-13	5
LRRC32	11q13.5	-1.18238	2.01466e-19	4
LTBP4	19q13.1-q13.2	-1.94619	1.03701e-43	3
MAN1A1	6q22.31	-1.28643	3.06723e-22	3
MAP1A	15q15.3	-1.03892	5.51161e-31	5
MFI2/MELTF	3q29	1.22184	5.09295e-13	6
MMRN1	4q22.1	-2.6711	1.97289e-49	3
MUC5B	11p15.5	1.57094	8.86779e-21	8
MYH11	16p13.11	-3.87181	4.31985e-71	4
NUSAP1	15q14	3.01428	4.19822e-73	3
P4HB	17q25.3	1.17225	1.52104e-34	3
PARP1	1q42.12	1.23356	4.14973e-45	3
PEAR1	1q23.1	-1.74715	7.75191e-64	3
PER1	17p13.1	-2.26536	3.01144e-53	3
PER2	2q37.3	-1.62554	6.80552e-39	3
PIGR	1q32.1	-3.37628	4.82064e-22	3
PLA2R1	2q23-q24	-1.49876	2.15867e-41	3
PLIN4	19p13.3	-5.43637	1.25084e-52	5
PREX2	8q13.2	-1.53886	3.49111e-46	4
PTEN	10q23.31	-1.10163	1.10221e-32	5
PTPRB	12q15	-1.79339	4.94171e-52	3
RAI2	Xp22.13	-2.5351	1.65469e-67	3
RUSC1	1q22	1.07459	1.10578e-34	3
SHE	1q21.3	-1.51174	1.78173e-52	3
SIDT2	11q23.3	-1.13338	1.29262e-43	3
SMARCA4	19p13.2	1.10297	2.02068e-29	3
SPTBN1	2p16.2	-1.5303	2.22878e-34	6
SVEP1	9q31.3	-2.88492	1.60387e-59	3
SYNE1	6q25.2	-1.0438	1.11417e-44	9
SYNE3	14q32.13	-1.6452	1.78143e-37	3
TBX15	1p12	-1.61443	7.23563e-34	3
TENM2	5q34	-1.1008	7.95484e-25	3
THBS4	5q14.1	-1.53198	3.43714e-14	3
TLN2	15q22.2	-1.39271	1.45702e-35	3
TNXB	6p21.33-p21.32	-3.17438	3.00963e-67	5
TROAP	12q13.12	2.38774	2.07499e-80	3
UNC5B	10q22.1	1.03267	1.16082e-22	3
UTRN	6q24.2	-1.73842	4.20993e-46	4
VANGL2	1q23.2	1.04217	1.65554e-10	3
VPS13C	15q22.2	-1.0048	4.84485e-28	3
VWF	12p13.31	-2.32274	8.88184e-43	5
ZNF106	15q15.1	-1.37058	1.24447e-36	3
ZNF469	16q24.2	1.03653	1.33927e-20	4
