# Supplementary material for: Integrating Germline and Somatic Mutation Information for the Discovery of Biomarkers in Triple-Negative Breast Cancer
Source: Int J Environ Res Public Health. 2019 Mar 23;16(6):1055. doi: 10.3390/ijerph16061055 (PMC6466377; doi:10.3390/ijerph16061055)
Supplement: Supplementary file 1 [file ijerph-16-01055-s001.zip › JIANDE-TNBC-TABLE S4B-SUBMITTED-14FEB2019.xlsx]

## Sheet: 07.TNBC.55.DE.Gem.nonSom.comm.g
Table S4B. List of the 55 germline mutated genes significantly associated with TNBC used in Figure 4 along with their estimates of P-Values
Genes Name	Chromosome position	logFC	Adjusted expression P-value
ACER2	9p22.1	-1.41698	6.62644e-47
ADH1B	4q23	-5.31075	3.25527e-59
ARL4A	7p21.3	-1.36979	1.34501e-26
ARPC1B	7q22.1	1.37972	4.31521e-26
ARRDC3	5q14.3	-1.26398	3.18677e-24
AURKA	20q13.2	2.76125	2.73954e-84
BCL2	18q21.33	-1.97579	2.19272e-50
BLM	15q26.1	1.40331	2.2171e-57
BRIP1	17q23.2	1.07499	2.68144e-38
CCL28	5p12	-2.53177	1.4374e-23
CDCA7	2q31.1	2.03675	1.90659e-47
CDKN2A	9p21.3	2.32901	1.64807e-30
CHEK1	11q24.2	1.56604	5.59177e-56
CHEK2	22q12.1	1.09874	1.03785e-43
CLK1	2q33.1	-1.02858	3.73253e-27
CLMP	11q24.1	-1.97029	1.47723e-37
COL1A1	17q21.33	1.76097	2.70484e-16
EBF1	5q33.3	-2.4638	2.33757e-51
EBF2	8p21.2	-1.21225	1.79487e-37
ESR1	6q25.1-q25.2	-2.75435	1.67673e-52
FGF10	5p12	-2.22793	2.40147e-67
FOXN3	14q31.3-q32.11	-1.26677	6.7861e-37
FOXP1	3p13	-1.02347	1.0266e-35
FTO	16q12.2	-1.09359	2.74799e-31
GSTM2	1p13.3	-1.53134	1.51202e-54
HEPACAM	11q24.2	-1.27572	2.54313e-30
HIST1H2BD	6p22.2	1.44821	6.92022e-18
ICAM1	19p13.2	1.01295	7.62722e-11
IGF1	12q23.2	-1.06925	1.59402e-36
IGFBP5	2q35	-1.4044	3.8982e-18
INHBB	2q14.2	-1.69105	7.43725e-23
KCNN4	19q13.31	1.11608	2.45227e-08
KLF4	9q31.2	-2.71371	9.56004e-50
LMO4	1p22.3	1.04582	1.39366e-16
MAPK10	4q21.3	-1.09675	1.29874e-22
MMP7	11q22.2	1.24028	7.63042e-05
NEK10	3p24.1	-1.22921	4.81113e-34
NR3C1	5q31.3	-1.7466	2.12858e-55
NREP	5q22.1	1.00247	2.05046e-19
PGR	11q22.1	-2.20126	2.1719e-42
PHGDH	1p12	1.02704	3.63561e-13
PTHLH	12p11.22	-1.34262	2.15576e-12
RAD51	15q15.1	1.85504	1.01316e-69
RGS10	10q26.11	1.19831	1.01373e-22
RRS1	8q13.1	1.30223	2.08676e-30
SIK2	11q23.1	-1.73305	1.03732e-40
SKAP2	7p15.2	-1.01003	2.94416e-26
SNRPB	20p13	1.42825	1.64311e-42
SPINK8	3p21.31	-1.12018	4.7176e-06
SUV39H2	10p13	1.26779	1.64626e-44
TNS1	2q35	-3.02084	1.27394e-59
TPD52	8q21.13	1.31964	5.71372e-17
TYMS	18p11.32	2.41371	1.22935e-51
VGLL3	3p12.1	-1.14879	1.45123e-24
XRCC2	7q36.1	1.31051	2.47889e-48
