# Supplementary material for: Integrating Germline and Somatic Mutation Information for the Discovery of Biomarkers in Triple-Negative Breast Cancer
Source: Int J Environ Res Public Health. 2019 Mar 23;16(6):1055. doi: 10.3390/ijerph16061055 (PMC6466377; doi:10.3390/ijerph16061055)
Supplement: Supplementary file 1 [file ijerph-16-01055-s001.zip › JIANDE-TNBC-TABLES S3-FV-237G-SUBMITTED-14FEB2019.xlsx]

## Sheet: 07.TNBC.237.DE.Gem.Som.comm.gen
Table S3. List of 237 significantly differentially expressed genes containing both germline and somatic mutations along with estimates of P-values from gene expression P-valyes and number of somatic mutation events per gene used in Figure 3
Genes Name	Chromosome position	Adjusted expression P-value	number of somatic mutation events
CREBBP	16p13.3	3.83386e-06	7
ARID1B	6q25.3	7.24754e-05	6
BRCA1	17q21.31	3.94602e-07	5
ERBB4	2q34	9.03183e-41	5
FHOD3	18q12.2	1.62409e-19	5
TNRC6B	22q13.1	9.59053e-06	5
ARHGAP24	4q21.23-q21.3	4.05162e-44	4
ARHGAP5	14q12	6.22093e-15	4
CNTNAP2	7q35-q36.1	2.35289e-05	4
DMD	Xp21.2-p21.1	2.41829e-40	4
EFR3B	2p23.3	0.000451433	4
KIAA0907/KHDC4	1q22	4.49643e-16	4
MSH3	5q14.1	2.45327e-30	4
MYO10	5p15.1	1.55776e-25	4
MYT1	20q13.33	0.00559757	4
RELN	7q22.1	8.35934e-21	4
SPAG17	1p12	7.67049e-05	4
TRIM46	1q22	1.1401e-17	4
ZFPM2	8q23	3.45914e-20	4
ADCY9	16p13.3	1.31268e-25	3
AKAP9	7q21.2	2.70233e-06	3
ASH1L	1q22	5.39119e-06	3
ASXL2	2p23.3	0.000116247	3
ATM	11q22.3	1.35237e-08	3
ATXN1	6p22.3	3.92454e-06	3
BAHCC1	17q25.3	0.0279713	3
CASZ1	1p36.22	0.000682651	3
CHST9	18q11.2	1.51589e-11	3
CNTNAP1	17q21.2	8.69268e-09	3
DNAH11	7p15.3	3.31747e-08	3
EGFR	7p11.2	7.03007e-13	3
EXO1	1q43	7.42934e-71	3
GREB1	2p25.1	7.12278e-24	3
GRM3	7q21.11-q21.12	2.47212e-07	3
KMT2C	7q36.1	2.96725e-12	3
LAMB2	3p21.31	6.50831e-39	3
MTHFR	1p36.22	8.72396e-13	3
NOTCH2	1p12	3.87505e-06	3
PALB2	16p12.2	1.62105e-07	3
RALY	20q11.22	7.45318e-29	3
SEC16B	1q25.2	1.05343e-09	3
SEMA4A	1q22	3.19002e-10	3
SETBP1	18q12.3	2.05296e-30	3
TBX3	12q24.21	3.27878e-21	3
TET2	4q24	0.00311617	3
XRN1	3q23	0.0102925	3
AACS	12q24.31	0.000315645	2
AGPAT9/GPAT3	4q21.23	3.56233e-06	2
ALS2CR11/C2CD6	2q33.1	0.0105605	2
ANO9	11p15.5	7.63563e-10	2
ANXA13	8q24.13	0.0273233	2
BBS2	16q13	3.3215e-36	2
BCAS1	20q13.2	3.87991e-13	2
BID	22q11.21	7.44688e-22	2
BRCA2	13q13.1	3.86266e-31	2
CCDC170	6q25.1	4.69861e-67	2
COL5A2	2q32.2	6.55591e-11	2
CTNNA2	2p12	0.0345569	2
CTNNA3	10q21.3	1.09603e-05	2
DOT1L	19p13.3	6.68994e-16	2
DSEL	18q22.1	2.05227e-40	2
ESRRG	1q41	0.0037351	2
EXT1	8q24.11	2.32839e-05	2
FAM208B	10p15.1	8.23046e-14	2
FANCG	9p13.3	1.31195e-28	2
FBN1	15q21.1	3.12305e-09	2
FBXL13	7q22.1	0.000947032	2
FBXL7	5p15.1	2.64296e-26	2
FKBPL	6p21.32	2.35878e-34	2
FOXM1	12p13.33	3.63764e-74	2
HELQ	4q21.23	1.05765e-28	2
HIVEP3	1p34.2	1.34304e-06	2
HSPA4	5q31.1	0.00222026	2
IGSF21	1p36.13	0.00016466	2
INCENP	11q12.3	5.33685e-39	2
ITPR1	3p26.1	9.36617e-49	2
JMJD1C	10q21.3	3.11727e-14	2
KIAA2026	9p24.1	3.63931e-06	2
KLHL38	8q24.13	2.44987e-09	2
LGR6	1q32.1	0.00474272	2
LRRN2	1q32.1	0.00032242	2
MN1	22q12.1	7.49433e-06	2
MSH6	2p16.3	2.67578e-23	2
MTR	1q43	0.000178808	2
MYO9B	19p13.11	4.96342e-18	2
NCOA1	2p23.3	1.31974e-19	2
NPAT	11q22.3	0.030431	2
NRXN3	14q24.3-q31.1	9.00221e-12	2
NUMA1	11q13.4	1.88379e-15	2
OTUD7B	1q21.2	0.00517777	2
PARP8	5q11.1	1.10284e-11	2
PCNT	21q22.3	2.52633e-09	2
PCSK7	11q23.3	4.21303e-15	2
PHLDB3	19q13.31	0.0248789	2
PIK3R1	5q13.1	6.96904e-39	2
PRKDC	8q11.21	4.86009e-18	2
PRKG1	10q11.23-q21.1	5.16457e-24	2
PTPRD	9p24.1-p23	0.0322214	2
RB1	13q14.2	1.69314e-18	2
RBBP8	18q11.2	0.00351413	2
RET	10q11.21	0.0359542	2
RIN3	14q32.13	1.92104e-07	2
RNF146	6q22.33	3.96529e-10	2
SATB1	3p24.3	2.06442e-13	2
SPTBN2	11q13.2	1.95782e-15	2
TACC2	10q26.13	1.06334e-05	2
TCF7L2	10q25.2-q25.3	5.24681e-15	2
TEKT5	16p13.13	0.0265772	2
TMEM104	17q25.1	4.70411e-27	2
TTC28	22q12.1	3.38636e-59	2
WRN	8p12	7.67361e-06	2
ZBTB38	3q23	1.03855e-18	2
ZC3H11A	1q32.1	0.0297714	2
ZC3H7B	22q13.2	0.00013063	2
A4GALT	22q13.2	0.00635452	1
ABCA8	17q24.2	3.75289e-68	1
ACAP1	17p13.1	0.00121626	1
ACAT1	11q22.3	1.03168e-17	1
ADH1C	4q23	1.11945e-64	1
AHRR	5p15.33	2.32504e-07	1
ALX4	11p11.2	5.99171e-25	1
ASTN2	9q33.1	1.85254e-10	1
ATAD5	17q11.2	2.61455e-22	1
ATXN7	3p14.1	4.30705e-10	1
BABAM1	19p13.11	8.51133e-23	1
BAIAP2L1	7q21.3-q22.1	1.42365e-37	1
BBOX1	11p14.2	6.6879e-06	1
BRSK1	19q13.42	1.44388e-09	1
C11orf80	11q13.2	9.22358e-11	1
C9orf3	9q22.32	0.000681703	1
CAMK1D	10p13	0.000211826	1
CBX8	17q25.3	6.22078e-27	1
CCNE1	19q12	2.91282e-61	1
CCSER1	4q22.1	5.05994e-13	1
CD34	1q32.2	1.59123e-59	1
CD46	1q32.2	6.36061e-08	1
CDC42BPA	1q42.13	8.86107e-06	1
CEP55	10q23.33	4.31258e-82	1
CHADL	22q13.2	0.0108099	1
COL11A1	1p21.1	1.60749e-42	1
COL8A1	3q12.1	0.00119174	1
COMT	22q11.21	0.0105981	1
CPEB3	10q23.32	6.81478e-31	1
CPNE5	6p21.2	1.34844e-06	1
CREB5	7p15.1-p14.3	4.65149e-21	1
CTSF	11q13.2	1.03177e-24	1
DAP3	1q22	2.59245e-38	1
DDX58	9p21.1	0.000661207	1
DNMT3A	2p23.3	4.51301e-30	1
DPY19L2P2	7q22.1	0.0220357	1
EGR2	10q21.3	1.13922e-27	1
EHMT2	6p21.33	1.59138e-26	1
ELL	19p13.11	0.00156797	1
EMB	5q11.1	2.35399e-05	1
EPSTI1	13q14.11	1.38851e-15	1
FAF1	1p32.3	8.31004e-12	1
FAM83B	6p12.1	1.33397e-07	1
FANCA	16q24.3	4.09728e-52	1
FGFR2	10q26.13	0.0425565	1
FGFR4	5q35.2	3.2542e-05	1
FILIP1L	3q12.1	2.82242e-28	1
GAREM1	18q12.1	8.34581e-17	1
GMEB2	20q13.33	3.39952e-13	1
GPR161	1q24.2	1.6628e-10	1
GRIK1	21q21.3	2.58683e-16	1
GSTP1	11q13.2	2.00426e-10	1
KANSL1	17q21.31	1.96933e-10	1
KCNJ6	21q22.13	7.44585e-06	1
KLHDC7A	1p36.13	1.42225e-20	1
LMX1B	9q33.3	1.28803e-12	1
LPA	6q25.3-q26	0.049573	1
MADD	11p11.2	4.60189e-06	1
MAP3K1	5q11.2	1.71759e-14	1
MAP4	3p21.31	7.88633e-12	1
MAPT	17q21.31	1.56588e-49	1
MAST1	19p13.2	2.07315e-15	1
MAST2	1p34.1	2.86028e-16	1
MCC	5q22.2	1.51599e-42	1
MCM8	20p12.3	8.57578e-18	1
MMP8	11q22.2	0.000110195	1
MYC	8q24.21	0.00542276	1
MYEOV	11q13.3	2.41837e-08	1
NEBL	10p12.31	0.000422172	1
NF2	22q12.2	4.61034e-08	1
NFIX	19p13.13	6.43975e-05	1
NIPSNAP1	22q12.2	1.21627e-21	1
NRIP1	21q11.2-q21.1	4.11555e-19	1
OR2A1	7q35	2.04927e-09	1
OVOL1	11q13.1	2.32237e-05	1
PCM1	8p22	1.75422e-21	1
PDS5B	13q13.1	4.93897e-07	1
PHF20	20q11.22-q11.23	0.027229	1
PIK3R3	1p34.1	0.00056651	1
PITPNB	22q12.1	0.000135164	1
PKD2	4q22.1	1.33956e-50	1
POLK	5q13.3	1.83704e-41	1
POLR2B	4q12	0.000461545	1
POR	7q11.23	1.87924e-15	1
PRC1	15q26.1	1.76036e-71	1
PRDM2	1p36.21	6.09012e-15	1
PRICKLE2	3p14.1	4.44705e-59	1
PTGS2	1q31.1	0.00311659	1
RAD50	5q31.1	7.61054e-24	1
REV1	2q11.2	6.59402e-13	1
RIN2	20p11.23	1.19483e-06	1
RPS6KA3	Xp22.12	3.72378e-13	1
RREB1	6p24.3	5.73506e-12	1
SGCE	7q21.3	2.31053e-14	1
SH3TC2	5q32	0.00919065	1
SHBG	17p13.1	0.028989	1
SIK3	11q23.3	1.20979e-26	1
SLAMF1	1q23.3	6.03307e-06	1
SLC12A2	5q23.3	1.51144e-09	1
SLC4A7	3p24.1	1.5071e-13	1
SMG6	17p13.3	2.89532e-21	1
SORBS1	10q24.1	1.63835e-47	1
SRBD1	2p21	0.000228307	1
SSBP4	19p13.1	0.000306509	1
SULT1E1	4q13.3	0.0446617	1
TAB2	6q25.1	3.72133e-05	1
TBC1D29	17q11.2	0.00046128	1
TBX1	22q11.21	1.42746e-05	1
TERT	5p15.33	1.46918e-11	1
TGFB1	19q13.1	7.06621e-07	1
TGFBR2	3p24.1	1.23793e-54	1
TNNT3	11p15.5	5.32229e-19	1
TOX3	16q12.1	0.00641493	1
TRAK2	2q33.1	1.28728e-21	1
TRIT1	1p34.2	1.15409e-14	1
TTBK1	6p21.1	2.59796e-06	1
VDR	12q13.11	0.000201738	1
XPA	9q22.33	2.059e-45	1
XPNPEP3	22q13.2	0.00127727	1
XRCC6	22q13.2	2.01472e-16	1
ZMIZ1	10q22.3	1.34876e-05	1
ZNF101	19p13.11	0.00367206	1
ZNF827	4q31.21-q31.22	6.83838e-05	1
