# Supplementary material for: Integrating Germline and Somatic Mutation Information for the Discovery of Biomarkers in Triple-Negative Breast Cancer
Source: Int J Environ Res Public Health. 2019 Mar 23;16(6):1055. doi: 10.3390/ijerph16061055 (PMC6466377; doi:10.3390/ijerph16061055)
Supplement: Supplementary file 1 [file ijerph-16-01055-s001.zip › JIANDE-TNBC-TABLES-SA-GWAS_FV-SUPPL- NEWCATALOGUE-14FEB2019.xlsx]

## Sheet: Sheet1
Table SA-Genetic susceptibility variants and genes derived from genome-wide association studies (GWAS) used in this study and including original reports from which they ware derived.
Part I Gnenetic susceptibility vraiants and genes derived from the GWAS catalogue; (see Part II below the table)
DATE ADDED TO CATALOG	PUBMEDID	FIRST AUTHOR	DATE	JOURNAL	LINK	STUDY	DISEASE/TRAIT	INITIAL SAMPLE SIZE	REPLICATION SAMPLE SIZE	REGION	CHR_ID	CHR_POS	JW632-TNBC-SIGNIFICANT	REPORTED GENE(S)	MAPPED_GENE	UPSTREAM_GENE_ID	DOWNSTREAM_GENE_ID	SNP_GENE_IDS	UPSTREAM_GENE_DISTANCE	DOWNSTREAM_GENE_DISTANCE	STRONGEST SNP-RISK ALLELE	SNPS	MERGED	SNP_ID_CURRENT	CONTEXT	INTERGENIC	RISK ALLELE FREQUENCY	P-VALUE	PVALUE_MLOG	P-VALUE (TEXT)	OR or BETA	95% CI (TEXT)	PLATFORM [SNPS PASSING QC]	CNV
2017-11-30	29059683	Michailidou K	2017-10-23	Nature	www.ncbi.nlm.nih.gov/pubmed/29059683	Association analysis identifies 65 new breast cancer risk loci.	Breast cancer	76,192 European ancestry cases, 63,082 European ancestry controls	46,785 European ancestry cases, 42,892 European ancestry controls, 14,068 East Asian ancestry cases, 13,104 East Asian ancestry controls	22q13.2	22	42745087	y	NR	A4GALT - RPL5P34	53947	388907		23786	31258	rs4820477-C	rs4820477	0	4820477	regulatory_region_variant	1	0.4847	9e-07	6.04576	(EA)	0.0307	[0.019-0.043] unit increase	Illumina [~ 11800000] (imputed)	N
2017-11-30	29059683	Michailidou K	2017-10-23	Nature	www.ncbi.nlm.nih.gov/pubmed/29059683	Association analysis identifies 65 new breast cancer risk loci.	Breast cancer	76,192 European ancestry cases, 63,082 European ancestry controls	46,785 European ancestry cases, 42,892 European ancestry controls, 14,068 East Asian ancestry cases, 13,104 East Asian ancestry controls	17q24.2	17	68904663	y	NR	ABCA8			10351			rs36059695-T	rs36059695	0	36059695	intron_variant	0	0.035	6e-08	7.22185	(EA)	0.1031	[0.066-0.14] unit decrease	Illumina [~ 11800000] (imputed)	N
2008-09-10	17903305	Murabito JM	2007-09-19	BMC Med Genet	www.ncbi.nlm.nih.gov/pubmed/17903305	A genome-wide association study of breast and prostate cancer in the NHLBI's Framingham Heart Study.	Breast cancer	58 cases, 665 controls	NA	13q32.1	13	95222702	y	ABCC4	ABCC4			10257			rs1926657-?	rs1926657	0	1926657	intron_variant	0	NR	2e-06	5.69897				Affymetrix [70897]	N
2017-11-30	29059683	Michailidou K	2017-10-23	Nature	www.ncbi.nlm.nih.gov/pubmed/29059683	Association analysis identifies 65 new breast cancer risk loci.	Breast cancer	76,192 European ancestry cases, 63,082 European ancestry controls	46,785 European ancestry cases, 42,892 European ancestry controls, 14,068 East Asian ancestry cases, 13,104 East Asian ancestry controls	6p21.33	6	30576624	y	NR	ABCF1			23			rs3132610-G	rs3132610	0	3132610	intron_variant	0	0.1198	1e-06	6	(EA)	0.0499	[0.03-0.07] unit decrease	Illumina [~ 11800000] (imputed)	N
2017-11-30	29059683	Michailidou K	2017-10-23	Nature	www.ncbi.nlm.nih.gov/pubmed/29059683	Association analysis identifies 65 new breast cancer risk loci.	Breast cancer	76,192 European ancestry cases, 63,082 European ancestry controls	46,785 European ancestry cases, 42,892 European ancestry controls, 14,068 East Asian ancestry cases, 13,104 East Asian ancestry controls	10p12.1	10	27189785	y	NR	ACBD5			91452			rs71386921-A	rs71386921	0	71386921	intergenic_variant	0	0.7961	3e-06	5.52288	(EA)	0.0366	[0.021-0.052] unit increase	Illumina [~ 11800000] (imputed)	N
2017-11-30	29059683	Michailidou K	2017-10-23	Nature	www.ncbi.nlm.nih.gov/pubmed/29059683	Association analysis identifies 65 new breast cancer risk loci.	Breast cancer	76,192 European ancestry cases, 63,082 European ancestry controls	46,785 European ancestry cases, 42,892 European ancestry controls, 14,068 East Asian ancestry cases, 13,104 East Asian ancestry controls	9p22.1	9	19457614	y	NR	ACER2 - MAP1LC3BP1	340485	392288		2441	3015	rs67500807-TG	rs67500807	0	67500807	TF_binding_site_variant	1	0.3727	4e-06	5.39794	(EA)	0.0396	[0.023-0.056] unit increase	Illumina [~ 11800000] (imputed)	N
2017-11-30	29059683	Michailidou K	2017-10-23	Nature	www.ncbi.nlm.nih.gov/pubmed/29059683	Association analysis identifies 65 new breast cancer risk loci.	Breast cancer	76,192 European ancestry cases, 63,082 European ancestry controls	46,785 European ancestry cases, 42,892 European ancestry controls, 14,068 East Asian ancestry cases, 13,104 East Asian ancestry controls	22q13.2	22	41501983	y	NR	ACO2			50			rs117078955-T	rs117078955	0	117078955	intron_variant	0	0.0178	1e-06	6	(EA)	0.1235	[0.074-0.173] unit increase	Illumina [~ 11800000] (imputed)	N
2017-11-30	29059683	Michailidou K	2017-10-23	Nature	www.ncbi.nlm.nih.gov/pubmed/29059683	Association analysis identifies 65 new breast cancer risk loci.	Breast cancer	76,192 European ancestry cases, 63,082 European ancestry controls	46,785 European ancestry cases, 42,892 European ancestry controls, 14,068 East Asian ancestry cases, 13,104 East Asian ancestry controls	4q34.1	4	174925275	y	ADAM29	ADAM29			11086			rs6828523-C	rs6828523	0	6828523	intron_variant	0	0.88	2e-25	24.699	(EA)	1.0989	[1.08-1.14] (Oncoarray)	Illumina [~ 11800000] (imputed)	N
2013-09-12	23535729	Michailidou K	2013-04-01	Nat Genet	www.ncbi.nlm.nih.gov/pubmed/23535729	Large-scale genotyping identifies 41 new loci associated with breast cancer risk.	Breast cancer	10,052 European ancestry cases, 12,575 European ancestry controls	45,290 European ancestry cases, 41,880 European ancestry controls	4q34.1	4	174925275	y	ADAM29	ADAM29			11086			rs6828523-C	rs6828523	0	6828523	intron_variant	0	0.87	4e-16	15.3979		1.11	[1.09-1.15]	Affymetrix, Illumina [~ 2600000] (imputed)	N
2017-11-14	25751625	Michailidou K	2015-04-01	Nat Genet	www.ncbi.nlm.nih.gov/pubmed/25751625	Genome-wide association analysis of more than 120,000 individuals identifies 15 new susceptibility loci for breast cancer.	Breast cancer	15,748 European ancestry cases, 18,084 European ancestry controls	46,785 European ancestry cases, 42,892 European ancestry controls	4q34.1	4	174925275	y	NR	ADAM29			11086			rs6828523-C	rs6828523	0	6828523	intron_variant	0	0.88	1e-15	15		1.11111	[1.08-1.15]	Affymetrix, Illumina [~ 11600000] (imputed)	N
2017-11-30	29059683	Michailidou K	2017-10-23	Nature	www.ncbi.nlm.nih.gov/pubmed/29059683	Association analysis identifies 65 new breast cancer risk loci.	Breast cancer	76,192 European ancestry cases, 63,082 European ancestry controls	46,785 European ancestry cases, 42,892 European ancestry controls, 14,068 East Asian ancestry cases, 13,104 East Asian ancestry controls	4q34.1	4	175011701	y	NR	ADAM29 - LOC105377552	11086	105377552		33521	1328	rs1966977-C	rs1966977	0	1966977	intergenic_variant	1	0.1984	6e-07	6.22185	(EA)	0.0422	[0.026-0.059] unit decrease	Illumina [~ 11800000] (imputed)	N
2013-06-06	23468962	Song C	2013-02-28	PLoS One	www.ncbi.nlm.nih.gov/pubmed/23468962	A genome-wide scan for breast cancer risk haplotypes among African American women.	Breast cancer	3,016 African American cases, 2,745 African American controls	NA	5p15.32	5;5	5320143;5324870	y		ADAMTS16; LOC101929200; LOC101929200						rs3806872-?; rs16875333-?	rs3806872; rs16875333	0		3_prime_UTR_variant; intergenic_variant		NR	3e-06	5.52288				Illumina [1006480]	N
2013-04-24	23354978	Rinella ES	2013-01-25	Hum Genet	www.ncbi.nlm.nih.gov/pubmed/23354978	Genetic variants associated with breast cancer risk for Ashkenazi Jewish women with strong family histories but no identifiable BRCA1/2 mutation.	Breast cancer	477 Ashkenazi Jewish cases, 524 Ashkenazi Jewish controls	203 Ashkenazi Jewish cases, 263 Ashkenazi Jewish contols	15q24.3	15	77977130	y	intergenic	ADAMTS7P3			400406			rs12906542-?	rs12906542	0	12906542	intron_variant	0	0.93	7e-07	6.1549	(Meta P value)	2	[NR]	Affymetrix [435632]	N
2017-11-30	29059683	Michailidou K	2017-10-23	Nature	www.ncbi.nlm.nih.gov/pubmed/29059683	Association analysis identifies 65 new breast cancer risk loci.	Breast cancer	76,192 European ancestry cases, 63,082 European ancestry controls	46,785 European ancestry cases, 42,892 European ancestry controls, 14,068 East Asian ancestry cases, 13,104 East Asian ancestry controls	2p23.3	2	24906604	y	ADCY3	ADCY3			109			rs6725517-G	rs6725517	0	6725517	intron_variant	0	0.59	3e-12	11.5229	(EA)	1.04167	[1.02-1.06] (Oncoarray)	Illumina [~ 11800000] (imputed)	N
2017-11-30	29059683	Michailidou K	2017-10-23	Nature	www.ncbi.nlm.nih.gov/pubmed/29059683	Association analysis identifies 65 new breast cancer risk loci.	Breast cancer	76,192 European ancestry cases, 63,082 European ancestry controls	46,785 European ancestry cases, 42,892 European ancestry controls, 14,068 East Asian ancestry cases, 13,104 East Asian ancestry controls	8q24.22	8	130991174	y	NR	ADCY8			114			rs73348588-T	rs73348588	0	73348588	intron_variant	0	0.0195	8e-07	6.09691	(EA)	0.1212	[0.073-0.169] unit increase	Illumina [~ 11800000] (imputed)	N
2017-12-19	29058716	Milne RL	2017-10-23	Nat Genet	www.ncbi.nlm.nih.gov/pubmed/29058716	Identification of ten variants associated with risk of estrogen-receptor-negative breast cancer.	Breast cancer	14,135 European ancestry ER- cases, 58,126 European ancestry controls, 7,784 European ancestry BRCA1 carrrier cases, 7,782 European ancestry BRCA1 carrrier controls	7,333 European ancestry ER- cases, 42,468 European ancestry controls, 1,630 European ancestry BRCA1 carrrier cases, 1,712 European ancestry BRCA1 carrrier controls	16p13.3	16	4056787	y	ADCY9	ADCY9			115			rs11076805-C	rs11076805	0	11076805	intron_variant	0	0.75	1e-08	8		1.08696	[1.05-1.11] (BCAC)	Illumina [~ 11500000] (imputed)	N
2017-12-19	29058716	Milne RL	2017-10-23	Nat Genet	www.ncbi.nlm.nih.gov/pubmed/29058716	Identification of ten variants associated with risk of estrogen-receptor-negative breast cancer.	Breast cancer (estrogen-receptor negative)	14,135 European ancestry cases, 58,126 European ancestry controls	7,333 European ancestry cases, 42,468 European ancestry controls	16p13.3	16	4056787	y	ADCY9	ADCY9			115			rs11076805-C	rs11076805	0	11076805	intron_variant	0	0.75	2e-08	7.69897		1.08696	[1.05-1.11]	Illumina [~ 11500000] (imputed)	N
2017-11-30	29059683	Michailidou K	2017-10-23	Nature	www.ncbi.nlm.nih.gov/pubmed/29059683	Association analysis identifies 65 new breast cancer risk loci.	Breast cancer	76,192 European ancestry cases, 63,082 European ancestry controls	46,785 European ancestry cases, 42,892 European ancestry controls, 14,068 East Asian ancestry cases, 13,104 East Asian ancestry controls	16p13.3	16	4058158	y	NR	ADCY9			115			rs56278937-T	rs56278937	0	56278937	intron_variant	0	0.5071	1e-06	6	(EA)	0.0317	[0.019-0.045] unit increase	Illumina [~ 11800000] (imputed)	N
2017-11-30	29059683	Michailidou K	2017-10-23	Nature	www.ncbi.nlm.nih.gov/pubmed/29059683	Association analysis identifies 65 new breast cancer risk loci.	Breast cancer	76,192 European ancestry cases, 63,082 European ancestry controls	46,785 European ancestry cases, 42,892 European ancestry controls, 14,068 East Asian ancestry cases, 13,104 East Asian ancestry controls	14q32.33	14	104745925	y	ADSSL1	ADSSL1			122622			rs10623258-C	rs10623258	0	10623258	non_coding_transcript_exon_variant	0	0.45	2e-08	7.69897	(EA)	1.04	[1.02-1.06] (Oncoarray)	Illumina [~ 11800000] (imputed)	N
2017-11-30	29059683	Michailidou K	2017-10-23	Nature	www.ncbi.nlm.nih.gov/pubmed/29059683	Association analysis identifies 65 new breast cancer risk loci.	Breast cancer	76,192 European ancestry cases, 63,082 European ancestry controls	46,785 European ancestry cases, 42,892 European ancestry controls, 14,068 East Asian ancestry cases, 13,104 East Asian ancestry controls	4q21.23	4	83549680	y	NR	AGPAT9			84803			rs1963045-C	rs1963045	0	1963045	intron_variant	0	0.4688	2e-06	5.69897	(EA)	0.0296	[0.017-0.042] unit increase	Illumina [~ 11800000] (imputed)	N
2017-11-30	29059683	Michailidou K	2017-10-23	Nature	www.ncbi.nlm.nih.gov/pubmed/29059683	Association analysis identifies 65 new breast cancer risk loci.	Breast cancer	76,192 European ancestry cases, 63,082 European ancestry controls	46,785 European ancestry cases, 42,892 European ancestry controls, 14,068 East Asian ancestry cases, 13,104 East Asian ancestry controls	9q21.33	9	85664713	y	NR	AGTPBP1			23287			rs77674461-C	rs77674461	0	77674461	intron_variant	0	0.0358	6e-06	5.22185	(EA)	0.0808	[0.046-0.116] unit increase	Illumina [~ 11800000] (imputed)	N
2017-11-30	29059683	Michailidou K	2017-10-23	Nature	www.ncbi.nlm.nih.gov/pubmed/29059683	Association analysis identifies 65 new breast cancer risk loci.	Breast cancer	76,192 European ancestry cases, 63,082 European ancestry controls	46,785 European ancestry cases, 42,892 European ancestry controls, 14,068 East Asian ancestry cases, 13,104 East Asian ancestry controls	5p15.33	5	344994	y	AHRR	AHRR			57491			rs116095464-T	rs116095464	1	62641919	intron_variant	0	0.05	4e-09	8.39794	(EA)	1.06	[1.02-1.1] (Oncoarray)	Illumina [~ 11800000] (imputed)	N
2017-11-30	29059683	Michailidou K	2017-10-23	Nature	www.ncbi.nlm.nih.gov/pubmed/29059683	Association analysis identifies 65 new breast cancer risk loci.	Breast cancer	76,192 European ancestry cases, 63,082 European ancestry controls	46,785 European ancestry cases, 42,892 European ancestry controls, 14,068 East Asian ancestry cases, 13,104 East Asian ancestry controls	7q21.2	7	92001306	y	AKAP9	AKAP9			10142			rs6964587-T	rs6964587	0	6964587	missense_variant	0	0.39	9e-11	10.0458	(EA)	1.03	[1.02-1.05] (Oncoarray)	Illumina [~ 11800000] (imputed)	N
2017-11-30	29059683	Michailidou K	2017-10-23	Nature	www.ncbi.nlm.nih.gov/pubmed/29059683	Association analysis identifies 65 new breast cancer risk loci.	Breast cancer	76,192 European ancestry cases, 63,082 European ancestry controls	46,785 European ancestry cases, 42,892 European ancestry controls, 14,068 East Asian ancestry cases, 13,104 East Asian ancestry controls	7q21.2	7	92022865	y	NR	AKAP9			10142			rs10644111-AAAC	rs10644111	0	10644111	inframe_insertion	0	0.3903	3e-11	10.5229	(EA)	0.0424	[0.03-0.055] unit increase	Illumina [~ 11800000] (imputed)	N
2017-11-14	25751625	Michailidou K	2015-04-01	Nat Genet	www.ncbi.nlm.nih.gov/pubmed/25751625	Genome-wide association analysis of more than 120,000 individuals identifies 15 new susceptibility loci for breast cancer.	Breast cancer	15,748 European ancestry cases, 18,084 European ancestry controls	46,785 European ancestry cases, 42,892 European ancestry controls	7q21.2	7	92001306	y	NR	AKAP9			10142			rs6964587-T	rs6964587	0	6964587	missense_variant	0	0.39	5e-07	6.30103		1.05	[1.03-1.07]	Affymetrix, Illumina [~ 11600000] (imputed)	N
2017-11-30	29059683	Michailidou K	2017-10-23	Nature	www.ncbi.nlm.nih.gov/pubmed/29059683	Association analysis identifies 65 new breast cancer risk loci.	Breast cancer	76,192 European ancestry cases, 63,082 European ancestry controls	46,785 European ancestry cases, 42,892 European ancestry controls, 14,068 East Asian ancestry cases, 13,104 East Asian ancestry controls	2q33.1	2	201502866	y	NR	ALS2CR11			151254			rs77688320-G	rs77688320	0	77688320	intron_variant	0	0.1668	3e-09	8.52288	(EA)	0.0489	[0.033-0.065] unit increase	Illumina [~ 11800000] (imputed)	N
2017-11-30	29059683	Michailidou K	2017-10-23	Nature	www.ncbi.nlm.nih.gov/pubmed/29059683	Association analysis identifies 65 new breast cancer risk loci.	Breast cancer	76,192 European ancestry cases, 63,082 European ancestry controls	46,785 European ancestry cases, 42,892 European ancestry controls, 14,068 East Asian ancestry cases, 13,104 East Asian ancestry controls	2q33.1	2	201316524	y	CASP8, ALS2CR12	ALS2CR12			130540			rs1830298-C	rs1830298	0	1830298	intron_variant	0	0.28	2e-16	15.699		1.06	[1.04-1.08] (Oncoarray)	Illumina [~ 11800000] (imputed)	N
2017-12-19	29058716	Milne RL	2017-10-23	Nat Genet	www.ncbi.nlm.nih.gov/pubmed/29058716	Identification of ten variants associated with risk of estrogen-receptor-negative breast cancer.	Breast cancer (estrogen-receptor negative)	14,135 European ancestry cases, 58,126 European ancestry controls	7,333 European ancestry cases, 42,468 European ancestry controls	2q33.1	2	201316524	y	NR	ALS2CR12			130540			rs1830298-C	rs1830298	0	1830298	intron_variant	0	0.28	7e-07	6.1549		1.08	[1.04-1.12] (Oncoarray)	Illumina [~ 11500000] (imputed)	N
2017-11-30	29059683	Michailidou K	2017-10-23	Nature	www.ncbi.nlm.nih.gov/pubmed/29059683	Association analysis identifies 65 new breast cancer risk loci.	Breast cancer	76,192 European ancestry cases, 63,082 European ancestry controls	46,785 European ancestry cases, 42,892 European ancestry controls, 14,068 East Asian ancestry cases, 13,104 East Asian ancestry controls	11p11.2	11	44347927	y	NR	ALX4 - LOC105376645	60529	105376645		37761	162185	rs3853291-A	rs3853291	0	3853291	intergenic_variant	1	0.5472	3e-07	6.52288	(EA)	0.0318	[0.02-0.044] unit increase	Illumina [~ 11800000] (imputed)	N
2017-11-30	29059683	Michailidou K	2017-10-23	Nature	www.ncbi.nlm.nih.gov/pubmed/29059683	Association analysis identifies 65 new breast cancer risk loci.	Breast cancer	76,192 European ancestry cases, 63,082 European ancestry controls	46,785 European ancestry cases, 42,892 European ancestry controls, 14,068 East Asian ancestry cases, 13,104 East Asian ancestry controls	16q13	16	56387075	y	AMFR	AMFR			267			rs2432539-G	rs2432539	0	2432539	intron_variant	0	0.4	4e-08	7.39794	(EA)	1.03	[1.02-1.05] (Oncoarray)	Illumina [~ 11800000] (imputed)	N
2017-11-30	29059683	Michailidou K	2017-10-23	Nature	www.ncbi.nlm.nih.gov/pubmed/29059683	Association analysis identifies 65 new breast cancer risk loci.	Breast cancer	76,192 European ancestry cases, 63,082 European ancestry controls	46,785 European ancestry cases, 42,892 European ancestry controls, 14,068 East Asian ancestry cases, 13,104 East Asian ancestry controls	7q21.2	7	92344194	y	NR	ANKIB1			54467			rs369328859-G	rs369328859	0	369328859	intron_variant	0	0.3748	2e-08	7.69897	(EA)	0.0369	[0.024-0.05] unit increase	Illumina [~ 11800000] (imputed)	N
2017-03-31	27117709	Couch FJ	2016-04-27	Nat Commun	www.ncbi.nlm.nih.gov/pubmed/27117709	Identification of four novel susceptibility loci for oestrogen receptor negative breast cancer.	Breast cancer	4,939 European ancestry estrogen receptor-negative cases, 14,352 European ancestry controls	7,333 European ancestry estrogen receptor-negative cases, 7,797 European ancestry BRCA1 mutation carrier cases, 7,455 European ancestry BRCA1 mutation carrier controls, 42,468 European ancestry controls	19p13.11	19	17283116	y	ADHB8	ANKLE1			126549			rs56069439-?	rs56069439	0	56069439	non_coding_transcript_exon_variant	0	0.3	1e-32	32		1.19	[1.14-1.24] (BRCA1 carriers)	Illumina [10909381] (imputed)	N
2017-03-31	27117709	Couch FJ	2016-04-27	Nat Commun	www.ncbi.nlm.nih.gov/pubmed/27117709	Identification of four novel susceptibility loci for oestrogen receptor negative breast cancer.	Breast cancer (estrogen-receptor negative)	4,939 European ancestry cases, 14,352 European ancestry controls	7,333 European ancestry cases, 42,468 European ancestry controls	19p13.11	19	17283116	y	ADHB8	ANKLE1			126549			rs56069439-?	rs56069439	0	56069439	non_coding_transcript_exon_variant	0	0.3	8e-19	18.0969		1.16	[1.13-1.20]	Illumina [10909381] (imputed)	N
2014-07-29	24325915	Purrington KS	2013-12-09	Carcinogenesis	www.ncbi.nlm.nih.gov/pubmed/24325915	Genome-wide association study identifies 25 known breast cancer susceptibility loci as risk factors for triple-negative breast cancer.	Breast cancer (estrogen-receptor negative, progesterone-receptor negative, and human epidermal growth factor-receptor negative)	1,529 European ancestry cases, 3,399 European ancestry controls	2,148 European ancestry cases, 1,309 European ancestry controls	19p13.11	19	17283315	y	intergenic	ANKLE1			126549			rs2363956-C	rs2363956	0	2363956	missense_variant	0		2e-08	7.69897		1.2195	[1.14-1.3]	Illumina [NR] (imputed)	N
2017-11-30	29059683	Michailidou K	2017-10-23	Nature	www.ncbi.nlm.nih.gov/pubmed/29059683	Association analysis identifies 65 new breast cancer risk loci.	Breast cancer	76,192 European ancestry cases, 63,082 European ancestry controls	46,785 European ancestry cases, 42,892 European ancestry controls, 14,068 East Asian ancestry cases, 13,104 East Asian ancestry controls	19p13.11	19	17283116	y	NR	ANKLE1			126549			rs56069439-A	rs56069439	0	56069439	non_coding_transcript_exon_variant	0	0.2968	9e-09	8.04576	(EA)	0.0387	[0.026-0.052] unit increase	Illumina [~ 11800000] (imputed)	N
2012-11-30	22976474	Siddiq A	2012-09-13	Hum Mol Genet	www.ncbi.nlm.nih.gov/pubmed/22976474	A meta-analysis of genome-wide association studies of breast cancer identifies two novel susceptibility loci at 6q14 and 20q11.	Breast cancer	3,666 European ancestry cases, 28,864 European ancestry controls, 1,004 African American cases, 2,744 African American controls	562 European ancestry cases, 6,410 European ancestry controls, 84 Japanese ancestry cases, 830 Japanese ancestry controls, 300 Latino cases, 1,164 Latino controls	19p13.11	19	17282085	y	NR	ANKLE1			126549			rs8100241-G	rs8100241	0	8100241	missense_variant	0	NR	4e-08	7.39794		1.14	[NR]	Illumina [2608509] (imputed)	N
2017-11-14	25751625	Michailidou K	2015-04-01	Nat Genet	www.ncbi.nlm.nih.gov/pubmed/25751625	Genome-wide association analysis of more than 120,000 individuals identifies 15 new susceptibility loci for breast cancer.	Breast cancer	15,748 European ancestry cases, 18,084 European ancestry controls	46,785 European ancestry cases, 42,892 European ancestry controls	19p13.11	19	17283315	y	NR	ANKLE1			126549			rs2363956-T	rs2363956	0	2363956	missense_variant	0	0.49	2e-06	5.69897		1.03	[1.01-1.05]	Affymetrix, Illumina [~ 11600000] (imputed)	N
2017-12-19	29058716	Milne RL	2017-10-23	Nat Genet	www.ncbi.nlm.nih.gov/pubmed/29058716	Identification of ten variants associated with risk of estrogen-receptor-negative breast cancer.	Breast cancer (estrogen-receptor negative)	14,135 European ancestry cases, 58,126 European ancestry controls	7,333 European ancestry cases, 42,468 European ancestry controls	19p13.11	19	17290595	y	ANKLE1	ANKLE1 - ABHD8	126549	79575		2949	1536	rs67397200-G	rs67397200	0	67397200	intergenic_variant	1	0.32	3e-37	36.5229		1.17	[1.14-1.19]	Illumina [~ 11500000] (imputed)	N
2017-12-19	29058716	Milne RL	2017-10-23	Nat Genet	www.ncbi.nlm.nih.gov/pubmed/29058716	Identification of ten variants associated with risk of estrogen-receptor-negative breast cancer.	Breast Cancer in BRCA1 mutation carriers	7,784 European ancestry carrier cases, 7,782 European ancestry carrier controls	1,630 European ancestry carrier cases, 1,712 European ancestry carrier controls	19p13.11	19	17290595	y	ANKLE1	ANKLE1 - ABHD8	126549	79575		2949	1536	rs67397200-G	rs67397200	0	67397200	intergenic_variant	1	0.32	3e-17	16.5229		1.18	[1.14-1.23]	Illumina [~ 11500000] (imputed)	N
2017-11-30	29059683	Michailidou K	2017-10-23	Nature	www.ncbi.nlm.nih.gov/pubmed/29059683	Association analysis identifies 65 new breast cancer risk loci.	Breast cancer	76,192 European ancestry cases, 63,082 European ancestry controls	46,785 European ancestry cases, 42,892 European ancestry controls, 14,068 East Asian ancestry cases, 13,104 East Asian ancestry controls	19p13.11	19	17290595	y	intergenic	ANKLE1 - ABHD8	126549	79575		2949	1536	rs67397200-G	rs67397200	0	67397200	intergenic_variant	1	0.3	2e-08	7.69897	(EA)	1.03	[1.01-1.05] (Oncoarray)	Illumina [~ 11800000] (imputed)	N
2017-11-30	29059683	Michailidou K	2017-10-23	Nature	www.ncbi.nlm.nih.gov/pubmed/29059683	Association analysis identifies 65 new breast cancer risk loci.	Breast cancer	76,192 European ancestry cases, 63,082 European ancestry controls	46,785 European ancestry cases, 42,892 European ancestry controls, 14,068 East Asian ancestry cases, 13,104 East Asian ancestry controls	10p12.1	10	27080233	y	NR	ANKRD26			22852			rs7918232-C	rs7918232	0	7918232	intron_variant	0	0.8143	8e-06	5.09691	(EA)	0.036	[0.02-0.052] unit increase	Illumina [~ 11800000] (imputed)	N
2017-11-30	29059683	Michailidou K	2017-10-23	Nature	www.ncbi.nlm.nih.gov/pubmed/29059683	Association analysis identifies 65 new breast cancer risk loci.	Breast cancer	76,192 European ancestry cases, 63,082 European ancestry controls	46,785 European ancestry cases, 42,892 European ancestry controls, 14,068 East Asian ancestry cases, 13,104 East Asian ancestry controls	11p15.5	11	442473	y	NR	ANO9 - PTDSS2	338440	81490		462	5791	rs11410354-CT	rs11410354	0	11410354	intergenic_variant	1	0.8001	2e-06	5.69897	(EA)	0.039	[0.023-0.055] unit decrease	Illumina [~ 11800000] (imputed)	N
2017-11-30	29059683	Michailidou K	2017-10-23	Nature	www.ncbi.nlm.nih.gov/pubmed/29059683	Association analysis identifies 65 new breast cancer risk loci.	Breast cancer	76,192 European ancestry cases, 63,082 European ancestry controls	46,785 European ancestry cases, 42,892 European ancestry controls, 14,068 East Asian ancestry cases, 13,104 East Asian ancestry controls	2p13.3	2	69207095	y	NR	ANTXR1			84168			rs12474538-A	rs12474538	0	12474538	intron_variant	0	0.1487	9e-08	7.04576	(EA)	0.0469	[0.03-0.064] unit decrease	Illumina [~ 11800000] (imputed)	N
2017-11-30	29059683	Michailidou K	2017-10-23	Nature	www.ncbi.nlm.nih.gov/pubmed/29059683	Association analysis identifies 65 new breast cancer risk loci.	Breast cancer	76,192 European ancestry cases, 63,082 European ancestry controls	46,785 European ancestry cases, 42,892 European ancestry controls, 14,068 East Asian ancestry cases, 13,104 East Asian ancestry controls	2p13.3	2	69023500	y	NR	ANTXR1			84168			rs66686620-A	rs66686620	0	66686620	intron_variant	0	0.1433	1e-07	7	(EA)	0.0469	[0.029-0.064] unit decrease	Illumina [~ 11800000] (imputed)	N
2017-11-30	29059683	Michailidou K	2017-10-23	Nature	www.ncbi.nlm.nih.gov/pubmed/29059683	Association analysis identifies 65 new breast cancer risk loci.	Breast cancer	76,192 European ancestry cases, 63,082 European ancestry controls	46,785 European ancestry cases, 42,892 European ancestry controls, 14,068 East Asian ancestry cases, 13,104 East Asian ancestry controls	1p13.2	1	113903258	y	NR	AP4B1			10717			rs7513707-A	rs7513707	0	7513707	intron_variant	0	0.1661	2e-11	10.699	(EA)	0.0554	[0.039-0.071] unit increase	Illumina [~ 11800000] (imputed)	N
2017-01-10	27354352	Han MR	2016-06-27	Hum Mol Genet	www.ncbi.nlm.nih.gov/pubmed/27354352	Genome-wide association study in East Asians identifies two novel breast cancer susceptibility loci.	Breast cancer	7,619 East Asian ancestry cases, 6,286 East Asian ancestry controls	6,605 East Asian ancestry cases, 8,543 East Asian ancestry controls	22q13.1	22	38962032	y		APOBEC3A			200315			rs12628403-C	rs12628403	0	12628403	intron_variant	0	0.27	4e-06	5.39794		1.17	[1.09-1.25]	Affymetrix, Illumina [668499] (imputed)	N
2017-11-30	29059683	Michailidou K	2017-10-23	Nature	www.ncbi.nlm.nih.gov/pubmed/29059683	Association analysis identifies 65 new breast cancer risk loci.	Breast cancer	76,192 European ancestry cases, 63,082 European ancestry controls	46,785 European ancestry cases, 42,892 European ancestry controls, 14,068 East Asian ancestry cases, 13,104 East Asian ancestry controls	14q32.33	14	103585480	y	NR	APOPT1			84334			rs60226654-C	rs60226654	0	60226654	intron_variant	0	0.4798	8e-06	5.09691	(EA)	0.0299	[0.017-0.043] unit increase	Illumina [~ 11800000] (imputed)	N
2017-11-30	29059683	Michailidou K	2017-10-23	Nature	www.ncbi.nlm.nih.gov/pubmed/29059683	Association analysis identifies 65 new breast cancer risk loci.	Breast cancer	76,192 European ancestry cases, 63,082 European ancestry controls	46,785 European ancestry cases, 42,892 European ancestry controls, 14,068 East Asian ancestry cases, 13,104 East Asian ancestry controls	4q21.23	4	85740190	y	NR	ARHGAP24			83478			rs71599425-A	rs71599425	0	71599425	intron_variant	0	0.0382	6e-06	5.22185	(EA)	0.0797	[0.045-0.114] unit decrease	Illumina [~ 11800000] (imputed)	N
2017-11-30	29059683	Michailidou K	2017-10-23	Nature	www.ncbi.nlm.nih.gov/pubmed/29059683	Association analysis identifies 65 new breast cancer risk loci.	Breast cancer	76,192 European ancestry cases, 63,082 European ancestry controls	46,785 European ancestry cases, 42,892 European ancestry controls, 14,068 East Asian ancestry cases, 13,104 East Asian ancestry controls	17q21.31	17	45394123	y	NR	ARHGAP27			201176			rs4763-A	rs4763	0	4763	3_prime_UTR_variant	0	0.1745	2e-08	7.69897	(EA)	0.0464	[0.03-0.063] unit decrease	Illumina [~ 11800000] (imputed)	N
2017-11-30	29059683	Michailidou K	2017-10-23	Nature	www.ncbi.nlm.nih.gov/pubmed/29059683	Association analysis identifies 65 new breast cancer risk loci.	Breast cancer	76,192 European ancestry cases, 63,082 European ancestry controls	46,785 European ancestry cases, 42,892 European ancestry controls, 14,068 East Asian ancestry cases, 13,104 East Asian ancestry controls	14q12	14	32127443	y	NR	ARHGAP5			394			rs140783387-C	rs140783387	0	140783387	intron_variant	0	0.0885	3e-07	6.52288	(EA)	0.0602	[0.037-0.083] unit increase	Illumina [~ 11800000] (imputed)	N
2017-11-30	29059683	Michailidou K	2017-10-23	Nature	www.ncbi.nlm.nih.gov/pubmed/29059683	Association analysis identifies 65 new breast cancer risk loci.	Breast cancer	76,192 European ancestry cases, 63,082 European ancestry controls	46,785 European ancestry cases, 42,892 European ancestry controls, 14,068 East Asian ancestry cases, 13,104 East Asian ancestry controls	5q13.2	5	73943871	y	NR	ARHGEF28 - LOC105379034	64283	105379034		1878	2227	rs157554-T	rs157554	0	157554	intergenic_variant	1	0.3171	7e-06	5.1549	(EA)	0.0308	[0.017-0.044] unit decrease	Illumina [~ 11800000] (imputed)	N
2013-09-12	23535729	Michailidou K	2013-04-01	Nat Genet	www.ncbi.nlm.nih.gov/pubmed/23535729	Large-scale genotyping identifies 41 new loci associated with breast cancer risk.	Breast cancer	10,052 European ancestry cases, 12,575 European ancestry controls	45,290 European ancestry cases, 41,880 European ancestry controls	7q35	7	144377836	y	ARHGEF5, NOBOX	ARHGEF5			7984			rs720475-G	rs720475	0	720475	intron_variant	0	0.75	7e-11	10.1549		1.06	[1.04-1.09]	Affymetrix, Illumina [~ 2600000] (imputed)	N
2017-11-30	29059683	Michailidou K	2017-10-23	Nature	www.ncbi.nlm.nih.gov/pubmed/29059683	Association analysis identifies 65 new breast cancer risk loci.	Breast cancer	76,192 European ancestry cases, 63,082 European ancestry controls	46,785 European ancestry cases, 42,892 European ancestry controls, 14,068 East Asian ancestry cases, 13,104 East Asian ancestry controls	7q35	7	144377836	y	NOBOX, ARHGEF6	ARHGEF5			7984			rs720475-G	rs720475	0	720475	intron_variant	0	0.75	1e-11	11	(EA)	1.04167	[1.02-1.06] (Oncoarray)	Illumina [~ 11800000] (imputed)	N
2017-11-14	25751625	Michailidou K	2015-04-01	Nat Genet	www.ncbi.nlm.nih.gov/pubmed/25751625	Genome-wide association analysis of more than 120,000 individuals identifies 15 new susceptibility loci for breast cancer.	Breast cancer	15,748 European ancestry cases, 18,084 European ancestry controls	46,785 European ancestry cases, 42,892 European ancestry controls	7q35	7	144377836	y	NR	ARHGEF5			7984			rs720475-G	rs720475	0	720475	intron_variant	0	0.75	4e-10	9.39794		1.06383	[1.04-1.09]	Affymetrix, Illumina [~ 11600000] (imputed)	N
2017-11-30	29059683	Michailidou K	2017-10-23	Nature	www.ncbi.nlm.nih.gov/pubmed/29059683	Association analysis identifies 65 new breast cancer risk loci.	Breast cancer	76,192 European ancestry cases, 63,082 European ancestry controls	46,785 European ancestry cases, 42,892 European ancestry controls, 14,068 East Asian ancestry cases, 13,104 East Asian ancestry controls	6q25.3	6	157009956	y	NR	ARID1B			57492			rs140842923-T	rs140842923	0	140842923	intron_variant	0	0.0214	3e-06	5.52288	(EA)	0.1059	[0.062-0.15] unit increase	Illumina [~ 11800000] (imputed)	N
2017-11-30	29059683	Michailidou K	2017-10-23	Nature	www.ncbi.nlm.nih.gov/pubmed/29059683	Association analysis identifies 65 new breast cancer risk loci.	Breast cancer	76,192 European ancestry cases, 63,082 European ancestry controls	46,785 European ancestry cases, 42,892 European ancestry controls, 14,068 East Asian ancestry cases, 13,104 East Asian ancestry controls	6q25.3	6	156907180	y	NR	ARID1B			57492			rs28648619-G	rs28648619	0	28648619	intron_variant	0	0.0804	5e-06	5.30103	(EA)	0.0551	[0.031-0.079] unit increase	Illumina [~ 11800000] (imputed)	N
2017-11-30	29059683	Michailidou K	2017-10-23	Nature	www.ncbi.nlm.nih.gov/pubmed/29059683	Association analysis identifies 65 new breast cancer risk loci.	Breast cancer	76,192 European ancestry cases, 63,082 European ancestry controls	46,785 European ancestry cases, 42,892 European ancestry controls, 14,068 East Asian ancestry cases, 13,104 East Asian ancestry controls	7p21.3	7	12721416	y	NR	ARL4A - RN7SKP228	10124	106479196		30482	155268	rs7810893-C	rs7810893	0	7810893	intergenic_variant	1	0.3487	4e-06	5.39794	(EA)	0.0299	[0.017-0.043] unit increase	Illumina [~ 11800000] (imputed)	N
2017-11-30	29059683	Michailidou K	2017-10-23	Nature	www.ncbi.nlm.nih.gov/pubmed/29059683	Association analysis identifies 65 new breast cancer risk loci.	Breast cancer	76,192 European ancestry cases, 63,082 European ancestry controls	46,785 European ancestry cases, 42,892 European ancestry controls, 14,068 East Asian ancestry cases, 13,104 East Asian ancestry controls	10p11.21	10	37101682	y	NR	ARL6IP1P2 - ANKRD30A	646348	91074		105895	24072	rs1200921-A	rs1200921	0	1200921	intergenic_variant	1	0.4634	6e-06	5.22185	(EA)	0.0289	[0.016-0.041] unit decrease	Illumina [~ 11800000] (imputed)	N
2017-11-30	29059683	Michailidou K	2017-10-23	Nature	www.ncbi.nlm.nih.gov/pubmed/29059683	Association analysis identifies 65 new breast cancer risk loci.	Breast cancer	76,192 European ancestry cases, 63,082 European ancestry controls	46,785 European ancestry cases, 42,892 European ancestry controls, 14,068 East Asian ancestry cases, 13,104 East Asian ancestry controls	5q14.3	5	91436408	y	ARRDC3	ARRDC3-AS1 - RAB5CP2	100129716	133789		15693	40003	rs10474352-C	rs10474352	0	10474352	intron_variant	1	0.84	5e-11	10.301	(EA)	1.06383	[1.03-1.09] (Oncoarray)	Illumina [~ 11800000] (imputed)	N
2015-04-01	25038754	Cai Q	2014-07-20	Nat Genet	www.ncbi.nlm.nih.gov/pubmed/25038754	Genome-wide association analysis in East Asians identifies breast cancer susceptibility loci at 1q32.1, 5q14.3 and 15q26.1.	Breast cancer	2,867 Chinese ancestry cases, 2,285 Chinese ancestry controls, 2,246 Korean ancestry cases, 2,052 Korean ancestry controls	5,029 Chinese ancestry cases, 5,302 Chinese ancestry controls, 6,066 Korean ancestry cases, 8,003 Korean ancestry controls, 6,572 Japanese ancestry cases, 6,539 Japanese ancestry controls, 16,003 European ancestry cases, 41,335 European ancestry controls	5q14.3	5	91436408	y	ARRDC3	ARRDC3-AS1 - RAB5CP2	100129716	133789		15693	40003	rs10474352-C	rs10474352	0	10474352	intron_variant	1	0.482	2e-09	8.69897	(East Asian)	1.09	[1.06-1.12]	Affymetrix [up to 1930412] (imputed)	N
2017-11-30	29059683	Michailidou K	2017-10-23	Nature	www.ncbi.nlm.nih.gov/pubmed/29059683	Association analysis identifies 65 new breast cancer risk loci.	Breast cancer	76,192 European ancestry cases, 63,082 European ancestry controls	46,785 European ancestry cases, 42,892 European ancestry controls, 14,068 East Asian ancestry cases, 13,104 East Asian ancestry controls	1q22	1	155446537	y	NR	ASH1L			55870			rs10796944-A	rs10796944	0	10796944	intron_variant	0	0.2299	7e-10	9.1549	(EA)	0.0457	[0.031-0.06] unit increase	Illumina [~ 11800000] (imputed)	N
2017-11-30	29059683	Michailidou K	2017-10-23	Nature	www.ncbi.nlm.nih.gov/pubmed/29059683	Association analysis identifies 65 new breast cancer risk loci.	Breast cancer	76,192 European ancestry cases, 63,082 European ancestry controls	46,785 European ancestry cases, 42,892 European ancestry controls, 14,068 East Asian ancestry cases, 13,104 East Asian ancestry controls	9q33.1	9	116672011	y	NR	ASTN2			23245			rs803903-G	rs803903	0	803903	intron_variant	0	0.6805	8e-12	11.0969	(EA)	0.0456	[0.032-0.059] unit increase	Illumina [~ 11800000] (imputed)	N
2017-11-30	29059683	Michailidou K	2017-10-23	Nature	www.ncbi.nlm.nih.gov/pubmed/29059683	Association analysis identifies 65 new breast cancer risk loci.	Breast cancer	76,192 European ancestry cases, 63,082 European ancestry controls	46,785 European ancestry cases, 42,892 European ancestry controls, 14,068 East Asian ancestry cases, 13,104 East Asian ancestry controls	9q33.1	9	116551207	y	ASTN2	ASTN2, ASTN2-AS1			23245, 100128505			rs1895062-G	rs1895062	0	1895062	intron_variant	0	0.59	1e-14	14	(EA)	1.06383	[1.05-1.09] (Oncoarray)	Illumina [~ 11800000] (imputed)	N
2017-11-30	29059683	Michailidou K	2017-10-23	Nature	www.ncbi.nlm.nih.gov/pubmed/29059683	Association analysis identifies 65 new breast cancer risk loci.	Breast cancer	76,192 European ancestry cases, 63,082 European ancestry controls	46,785 European ancestry cases, 42,892 European ancestry controls, 14,068 East Asian ancestry cases, 13,104 East Asian ancestry controls	2p23.3	2	25886882	y	NR	ASXL2 - NDUFB4P4	55252	107075092		8397	82	rs144079028-T	rs144079028	0	144079028	intergenic_variant	1	0.7152	9e-06	5.04576	(EA)	0.0312	[0.017-0.045] unit increase	Illumina [~ 11800000] (imputed)	N
2017-11-30	29059683	Michailidou K	2017-10-23	Nature	www.ncbi.nlm.nih.gov/pubmed/29059683	Association analysis identifies 65 new breast cancer risk loci.	Breast cancer	76,192 European ancestry cases, 63,082 European ancestry controls	46,785 European ancestry cases, 42,892 European ancestry controls, 14,068 East Asian ancestry cases, 13,104 East Asian ancestry controls	17q11.2	17	30884649	y	NR	ATAD5			79915			rs7223535-A	rs7223535	0	7223535	intron_variant	0	0.268	4e-10	9.39794	(EA)	0.0439	[0.03-0.058] unit decrease	Illumina [~ 11800000] (imputed)	N
2015-04-19	21263130	Fletcher O	2011-01-24	J Natl Cancer Inst	www.ncbi.nlm.nih.gov/pubmed/21263130	Novel breast cancer susceptibility locus at 9q31.2: results of a genome-wide association study.	Breast cancer	2,839 European ancestry cases, 3,507 European ancestry controls	9,041 European ancestry cases, 8,980 European ancestry controls	10q26.13	10	121865675	y	FGFR2	ATE1			11101			rs10510102-G	rs10510102	0	10510102	intron_variant	0	0.17	2e-06	5.69897		1.12	[1.07-1.17]	Illumina [~ 296114]	N
2017-11-30	29059683	Michailidou K	2017-10-23	Nature	www.ncbi.nlm.nih.gov/pubmed/29059683	Association analysis identifies 65 new breast cancer risk loci.	Breast cancer	76,192 European ancestry cases, 63,082 European ancestry controls	46,785 European ancestry cases, 42,892 European ancestry controls, 14,068 East Asian ancestry cases, 13,104 East Asian ancestry controls	10q26.13	10	121904429	y	NR	ATE1			11101			rs7899628-T	rs7899628	0	7899628	intron_variant	0	0.3585	9e-10	9.04576	(EA)	0.0396	[0.027-0.052] unit decrease	Illumina [~ 11800000] (imputed)	N
2017-11-30	29059683	Michailidou K	2017-10-23	Nature	www.ncbi.nlm.nih.gov/pubmed/29059683	Association analysis identifies 65 new breast cancer risk loci.	Breast cancer	76,192 European ancestry cases, 63,082 European ancestry controls	46,785 European ancestry cases, 42,892 European ancestry controls, 14,068 East Asian ancestry cases, 13,104 East Asian ancestry controls	10q26.13	10	121795069	y	NR	ATE1			11101			rs111605422-A	rs111605422	0	111605422	intron_variant	0	0.0569	9e-13	12.0458	(EA)	0.0936	[0.068-0.119] unit increase	Illumina [~ 11800000] (imputed)	N
2017-11-30	29059683	Michailidou K	2017-10-23	Nature	www.ncbi.nlm.nih.gov/pubmed/29059683	Association analysis identifies 65 new breast cancer risk loci.	Breast cancer	76,192 European ancestry cases, 63,082 European ancestry controls	46,785 European ancestry cases, 42,892 European ancestry controls, 14,068 East Asian ancestry cases, 13,104 East Asian ancestry controls	5q14.2	5	82242227	y	ATG10	ATG10			83734			rs7707921-A	rs7707921	0	7707921	intron_variant	0	0.75	2e-12	11.699	(EA)	1.04167	[1.02-1.06] (Oncoarray)	Illumina [~ 11800000] (imputed)	N
2017-11-14	25751625	Michailidou K	2015-04-01	Nat Genet	www.ncbi.nlm.nih.gov/pubmed/25751625	Genome-wide association analysis of more than 120,000 individuals identifies 15 new susceptibility loci for breast cancer.	Breast cancer	15,748 European ancestry cases, 18,084 European ancestry controls	46,785 European ancestry cases, 42,892 European ancestry controls	5q14.2	5	82242227	y	ATG10	ATG10			83734			rs7707921-A	rs7707921	0	7707921	intron_variant	0	0.77	5e-11	10.301		1.07527	[1.05-1.1]	Affymetrix, Illumina [~ 11600000] (imputed)	N
2017-11-30	29059683	Michailidou K	2017-10-23	Nature	www.ncbi.nlm.nih.gov/pubmed/29059683	Association analysis identifies 65 new breast cancer risk loci.	Breast cancer	76,192 European ancestry cases, 63,082 European ancestry controls	46,785 European ancestry cases, 42,892 European ancestry controls, 14,068 East Asian ancestry cases, 13,104 East Asian ancestry controls	5q14.2	5	82217129	y	NR	ATG10			83734			rs146817970-T	rs146817970	0	146817970	intron_variant	0	0.2459	4e-13	12.3979	(EA)	0.0532	[0.039-0.068] unit decrease	Illumina [~ 11800000] (imputed)	N
2017-11-30	29059683	Michailidou K	2017-10-23	Nature	www.ncbi.nlm.nih.gov/pubmed/29059683	Association analysis identifies 65 new breast cancer risk loci.	Breast cancer	76,192 European ancestry cases, 63,082 European ancestry controls	46,785 European ancestry cases, 42,892 European ancestry controls, 14,068 East Asian ancestry cases, 13,104 East Asian ancestry controls	5q14.1	5	81972251	y	NR	ATG10			83734			rs111549985-G	rs111549985	0	111549985	5_prime_UTR_variant	0	0.2474	6e-12	11.2218	(EA)	0.0498	[0.036-0.064] unit decrease	Illumina [~ 11800000] (imputed)	N
2017-11-30	29059683	Michailidou K	2017-10-23	Nature	www.ncbi.nlm.nih.gov/pubmed/29059683	Association analysis identifies 65 new breast cancer risk loci.	Breast cancer	76,192 European ancestry cases, 63,082 European ancestry controls	46,785 European ancestry cases, 42,892 European ancestry controls, 14,068 East Asian ancestry cases, 13,104 East Asian ancestry controls	5q14.2	5	82340549	y	NR	ATP6AP1L			92270			rs2407156-G	rs2407156	0	2407156	intron_variant	0	0.2383	2e-06	5.69897	(EA)	0.0354	[0.021-0.05] unit decrease	Illumina [~ 11800000] (imputed)	N
2017-11-30	29059683	Michailidou K	2017-10-23	Nature	www.ncbi.nlm.nih.gov/pubmed/29059683	Association analysis identifies 65 new breast cancer risk loci.	Breast cancer	76,192 European ancestry cases, 63,082 European ancestry controls	46,785 European ancestry cases, 42,892 European ancestry controls, 14,068 East Asian ancestry cases, 13,104 East Asian ancestry controls	6p22.3	6	16399326	y	ATXN1	ATXN1			6310			rs3819405-T	rs3819405	0	3819405	intron_variant	0	0.67	2e-08	7.69897	(EA)	1.04167	[1.03-1.06] (Oncoarray)	Illumina [~ 11800000] (imputed)	N
2017-11-30	29059683	Michailidou K	2017-10-23	Nature	www.ncbi.nlm.nih.gov/pubmed/29059683	Association analysis identifies 65 new breast cancer risk loci.	Breast cancer	76,192 European ancestry cases, 63,082 European ancestry controls	46,785 European ancestry cases, 42,892 European ancestry controls, 14,068 East Asian ancestry cases, 13,104 East Asian ancestry controls	3p14.1	3	63982224	y	ATNX7	ATXN7			6314			rs1053338-G	rs1053338	0	1053338	missense_variant	0	0.14	5e-11	10.301	(EA)	1.05	[1.02-1.07] (Oncoarray)	Illumina [~ 11800000] (imputed)	N
2017-11-30	29059683	Michailidou K	2017-10-23	Nature	www.ncbi.nlm.nih.gov/pubmed/29059683	Association analysis identifies 65 new breast cancer risk loci.	Breast cancer	76,192 European ancestry cases, 63,082 European ancestry controls	46,785 European ancestry cases, 42,892 European ancestry controls, 14,068 East Asian ancestry cases, 13,104 East Asian ancestry controls	3p14.1	3	63956021	y	NR	ATXN7			6314			rs3821902-G	rs3821902	0	3821902	intron_variant	0	0.1358	3e-12	11.5229	(EA)	0.0623	[0.045-0.08] unit increase	Illumina [~ 11800000] (imputed)	N
2017-11-14	25751625	Michailidou K	2015-04-01	Nat Genet	www.ncbi.nlm.nih.gov/pubmed/25751625	Genome-wide association analysis of more than 120,000 individuals identifies 15 new susceptibility loci for breast cancer.	Breast cancer	15,748 European ancestry cases, 18,084 European ancestry controls	46,785 European ancestry cases, 42,892 European ancestry controls	3p14.1	3	63982224	y	NR	ATXN7			6314			rs1053338-G	rs1053338	0	1053338	missense_variant	0	0.13	9e-09	8.04576		1.08	[1.05-1.11]	Affymetrix, Illumina [~ 11600000] (imputed)	N
2017-11-30	29059683	Michailidou K	2017-10-23	Nature	www.ncbi.nlm.nih.gov/pubmed/29059683	Association analysis identifies 65 new breast cancer risk loci.	Breast cancer	76,192 European ancestry cases, 63,082 European ancestry controls	46,785 European ancestry cases, 42,892 European ancestry controls, 14,068 East Asian ancestry cases, 13,104 East Asian ancestry controls	17q25.3	17	82946434	y	NR	B3GNTL1			146712			rs898097-T	rs898097	0	898097	coding_sequence_variant	0	0.6532	2e-06	5.69897	(EA)	0.0311	[0.018-0.044] unit increase	Illumina [~ 11800000] (imputed)	N
2010-10-07	20852631	Antoniou AC	2010-09-19	Nat Genet	www.ncbi.nlm.nih.gov/pubmed/20852631	A locus on 19p13 modifies risk of breast cancer in BRCA1 mutation carriers and is associated with hormone receptor-negative breast cancer in the general population.	Breast cancer	1,193 European ancestry cases, 1,190 European ancestry controls	2,974 European ancestry cases, 3,012 European ancestry controls	19p13.11	19	17278895	y	ANKLE1, C19orf62, ABHD8	BABAM1			29086			rs8170-A	rs8170	0	8170	synonymous_variant	0	0.17	2e-09	8.69897		1.26	[1.17-1.35]	Illumina [555616]	N
2013-08-02	23544013	Couch FJ	2013-03-27	PLoS Genet	www.ncbi.nlm.nih.gov/pubmed/23544013	Genome-wide association study in BRCA1 mutation carriers identifies novel loci associated with breast and ovarian cancer risk.	Breast Cancer in BRCA1 mutation carriers	1,426 European ancestry cases, 1,301 European ancestry controls	6,031 European ancestry cases, 5,933 European ancestry controls	19p13.11	19	17278895	y	intergenic	BABAM1			29086			rs8170-G	rs8170	0	8170	synonymous_variant	0	0.48	4e-13	12.3979		1.19	[1.14-1.25]	Illumina [2568349] (imputed)	N
2013-09-12	23535733	Garcia-Closas M	2013-04-01	Nat Genet	www.ncbi.nlm.nih.gov/pubmed/23535733	Genome-wide association studies identify four ER negative-specific breast cancer risk loci.	Breast cancer	4,193 European ancestry cases, 35,194 European ancestry controls	6,514 European ancestry cases, 41,455 European ancestry controls	19p13.11	19	17278895	y	MERIT40	BABAM1			29086			rs8170-A	rs8170	0	8170	synonymous_variant	0	0.191	9e-13	12.0458		1.15	[1.11-1.20]	Illumina [NR]	N
2017-03-31	27117709	Couch FJ	2016-04-27	Nat Commun	www.ncbi.nlm.nih.gov/pubmed/27117709	Identification of four novel susceptibility loci for oestrogen receptor negative breast cancer.	Breast cancer	4,939 European ancestry estrogen receptor-negative cases, 14,352 European ancestry controls	7,333 European ancestry estrogen receptor-negative cases, 7,797 European ancestry BRCA1 mutation carrier cases, 7,455 European ancestry BRCA1 mutation carrier controls, 42,468 European ancestry controls	19p13.11	19	17278895	y	MERIT40	BABAM1			29086			rs8170-?	rs8170	0	8170	synonymous_variant	0	0.19	7e-21	20.1549		1.17	[1.11-1.23] (BRCA1 carriers)	Illumina [10909381] (imputed)	N
2017-03-31	27117709	Couch FJ	2016-04-27	Nat Commun	www.ncbi.nlm.nih.gov/pubmed/27117709	Identification of four novel susceptibility loci for oestrogen receptor negative breast cancer.	Breast cancer (estrogen-receptor negative)	4,939 European ancestry cases, 14,352 European ancestry controls	7,333 European ancestry cases, 42,468 European ancestry controls	19p13.11	19	17278895	y	MERIT40	BABAM1			29086			rs8170-?	rs8170	0	8170	synonymous_variant	0	0.19	1e-12	12		1.15	[1.11-1.20]	Illumina [10909381] (imputed)	N
2017-11-14	25751625	Michailidou K	2015-04-01	Nat Genet	www.ncbi.nlm.nih.gov/pubmed/25751625	Genome-wide association analysis of more than 120,000 individuals identifies 15 new susceptibility loci for breast cancer.	Breast cancer	15,748 European ancestry cases, 18,084 European ancestry controls	46,785 European ancestry cases, 42,892 European ancestry controls	19p13.11	19	17278895	y	NR	BABAM1			29086			rs8170-A	rs8170	0	8170	synonymous_variant	0	0.19	2e-06	5.69897		1.04	[1.02-1.07]	Affymetrix, Illumina [~ 11600000] (imputed)	N
2017-11-30	29059683	Michailidou K	2017-10-23	Nature	www.ncbi.nlm.nih.gov/pubmed/29059683	Association analysis identifies 65 new breast cancer risk loci.	Breast cancer	76,192 European ancestry cases, 63,082 European ancestry controls	46,785 European ancestry cases, 42,892 European ancestry controls, 14,068 East Asian ancestry cases, 13,104 East Asian ancestry controls	17q25.3	17	81397410	y	NR	BAHCC1			57597			rs8074440-C	rs8074440	0	8074440	intron_variant	0	0.5239	3e-06	5.52288	(EA)	0.0353	[0.02-0.05] unit increase	Illumina [~ 11800000] (imputed)	N
2017-11-30	29059683	Michailidou K	2017-10-23	Nature	www.ncbi.nlm.nih.gov/pubmed/29059683	Association analysis identifies 65 new breast cancer risk loci.	Breast cancer	76,192 European ancestry cases, 63,082 European ancestry controls	46,785 European ancestry cases, 42,892 European ancestry controls, 14,068 East Asian ancestry cases, 13,104 East Asian ancestry controls	7q21.3	7	98397243	y	NR	BAIAP2L1			55971			rs79518236-A	rs79518236	0	79518236	intron_variant	0	0.2327	1e-07	7	(EA)	0.0396	[0.025-0.054] unit decrease	Illumina [~ 11800000] (imputed)	N
2017-11-30	29059683	Michailidou K	2017-10-23	Nature	www.ncbi.nlm.nih.gov/pubmed/29059683	Association analysis identifies 65 new breast cancer risk loci.	Breast cancer	76,192 European ancestry cases, 63,082 European ancestry controls	46,785 European ancestry cases, 42,892 European ancestry controls, 14,068 East Asian ancestry cases, 13,104 East Asian ancestry controls	11p14.2	11	27063657	y	NR	BBOX1, BBOX1-AS1			8424, 103695435			rs11354714-C	rs11354714	0	11354714	intron_variant	0	0.4193	3e-06	5.52288	(EA)	0.0318	[0.018-0.045] unit increase	Illumina [~ 11800000] (imputed)	N
2017-11-30	29059683	Michailidou K	2017-10-23	Nature	www.ncbi.nlm.nih.gov/pubmed/29059683	Association analysis identifies 65 new breast cancer risk loci.	Breast cancer	76,192 European ancestry cases, 63,082 European ancestry controls	46,785 European ancestry cases, 42,892 European ancestry controls, 14,068 East Asian ancestry cases, 13,104 East Asian ancestry controls	16q13	16	56497273	y	NR	BBS2			583			rs2303282-G	rs2303282	0	2303282	non_coding_transcript_exon_variant	0	0.6029	3e-07	6.52288	(EA)	0.0323	[0.02-0.045] unit decrease	Illumina [~ 11800000] (imputed)	N
2017-11-30	29059683	Michailidou K	2017-10-23	Nature	www.ncbi.nlm.nih.gov/pubmed/29059683	Association analysis identifies 65 new breast cancer risk loci.	Breast cancer	76,192 European ancestry cases, 63,082 European ancestry controls	46,785 European ancestry cases, 42,892 European ancestry controls, 14,068 East Asian ancestry cases, 13,104 East Asian ancestry controls	20q13.2	20	53956293	y	NR	BCAS1			8537			rs375506010-T	rs375506010	0	375506010	intron_variant	0	0.1809	5e-06	5.30103	(EA)	0.0395	[0.022-0.057] unit increase	Illumina [~ 11800000] (imputed)	N
2013-06-06	23468962	Song C	2013-02-28	PLoS One	www.ncbi.nlm.nih.gov/pubmed/23468962	A genome-wide scan for breast cancer risk haplotypes among African American women.	Breast cancer	3,016 African American cases, 2,745 African American controls	NA	17q23.2	17;17	61319088;61314018	y		BCAS3; BCAS3						rs10853029-?; rs3785856-?	rs10853029; rs3785856	0		intron_variant; intron_variant		NR	8e-06	5.09691	(Haplotype-?????)			Illumina [1006480]	N
2017-11-30	29059683	Michailidou K	2017-10-23	Nature	www.ncbi.nlm.nih.gov/pubmed/29059683	Association analysis identifies 65 new breast cancer risk loci.	Breast cancer	76,192 European ancestry cases, 63,082 European ancestry controls	46,785 European ancestry cases, 42,892 European ancestry controls, 14,068 East Asian ancestry cases, 13,104 East Asian ancestry controls	20q13.13	20	50826118	y	NR	BCAS4			55653			rs6020772-T	rs6020772	0	6020772	intron_variant	0	0.2491	1e-06	6	(EA)	0.0348	[0.021-0.049] unit decrease	Illumina [~ 11800000] (imputed)	N
2017-11-30	29059683	Michailidou K	2017-10-23	Nature	www.ncbi.nlm.nih.gov/pubmed/29059683	Association analysis identifies 65 new breast cancer risk loci.	Breast cancer	76,192 European ancestry cases, 63,082 European ancestry controls	46,785 European ancestry cases, 42,892 European ancestry controls, 14,068 East Asian ancestry cases, 13,104 East Asian ancestry controls	6q14.1	6	80384570	y	intergenic	BCKDHB			594			rs12207986-G	rs12207986	0	12207986	intergenic_variant	0	0.53	2e-09	8.69897	(EA)	1.03093	[1.02-1.05] (Oncoarray)	Illumina [~ 11800000] (imputed)	N
2017-11-30	29059683	Michailidou K	2017-10-23	Nature	www.ncbi.nlm.nih.gov/pubmed/29059683	Association analysis identifies 65 new breast cancer risk loci.	Breast cancer	76,192 European ancestry cases, 63,082 European ancestry controls	46,785 European ancestry cases, 42,892 European ancestry controls, 14,068 East Asian ancestry cases, 13,104 East Asian ancestry controls	18q21.33	18	63178058	y	NR	BCL2			596			rs4940575-C	rs4940575	0	4940575	intron_variant	0	0.1666	4e-06	5.39794	(EA)	0.04	[0.023-0.057] unit increase	Illumina [~ 11800000] (imputed)	N
2017-11-30	29059683	Michailidou K	2017-10-23	Nature	www.ncbi.nlm.nih.gov/pubmed/29059683	Association analysis identifies 65 new breast cancer risk loci.	Breast cancer	76,192 European ancestry cases, 63,082 European ancestry controls	46,785 European ancestry cases, 42,892 European ancestry controls, 14,068 East Asian ancestry cases, 13,104 East Asian ancestry controls	2q13	2	111168161	y	BCL2L11	BCL2L11			10018			rs71801447-CTTATGTT	rs71801447	0	71801447	3_prime_UTR_variant	0	0.06	4e-08	7.39794	(EA)	1.09	[1.05-1.13] (Oncoarray)	Illumina [~ 11800000] (imputed)	N
2017-11-30	29059683	Michailidou K	2017-10-23	Nature	www.ncbi.nlm.nih.gov/pubmed/29059683	Association analysis identifies 65 new breast cancer risk loci.	Breast cancer	76,192 European ancestry cases, 63,082 European ancestry controls	46,785 European ancestry cases, 42,892 European ancestry controls, 14,068 East Asian ancestry cases, 13,104 East Asian ancestry controls	8p21.3	8	22634616	y	NR	BIN3			55909			rs6558174-G	rs6558174	0	6558174	intron_variant	0	0.7027	3e-06	5.52288	(EA)	0.0362	[0.021-0.051] unit increase	Illumina [~ 11800000] (imputed)	N
2017-11-30	29059683	Michailidou K	2017-10-23	Nature	www.ncbi.nlm.nih.gov/pubmed/29059683	Association analysis identifies 65 new breast cancer risk loci.	Breast cancer	76,192 European ancestry cases, 63,082 European ancestry controls	46,785 European ancestry cases, 42,892 European ancestry controls, 14,068 East Asian ancestry cases, 13,104 East Asian ancestry controls	13q13.1	13	32398489	y	BRCA2	BRCA2			675			rs11571833-T	rs11571833	0	11571833	stop_gained	0	0.01	3e-15	14.5229	(EA)	1.35	[1.23-1.48] (Oncoarray)	Illumina [~ 11800000] (imputed)	N
2013-09-12	23535733	Garcia-Closas M	2013-04-01	Nat Genet	www.ncbi.nlm.nih.gov/pubmed/23535733	Genome-wide association studies identify four ER negative-specific breast cancer risk loci.	Breast cancer	4,193 European ancestry cases, 35,194 European ancestry controls	6,514 European ancestry cases, 41,455 European ancestry controls	13q13.1	13	32398489	y	BRCA2, N4BP2L1	BRCA2			675			rs11571833-T	rs11571833	0	11571833	stop_gained	0	0.496	6e-06	5.22185		1.52	[1.31-1.77]	Illumina [NR]	N
2013-09-12	23535729	Michailidou K	2013-04-01	Nat Genet	www.ncbi.nlm.nih.gov/pubmed/23535729	Large-scale genotyping identifies 41 new loci associated with breast cancer risk.	Breast cancer	10,052 European ancestry cases, 12,575 European ancestry controls	45,290 European ancestry cases, 41,880 European ancestry controls	13q13.1	13	32398489	y	BRCA2, N4BP2L1, N4BP2L2	BRCA2			675			rs11571833-T	rs11571833	0	11571833	stop_gained	0	0.008	5e-08	7.30103		1.26	[1.14-1.39]	Affymetrix, Illumina [~ 2600000] (imputed)	N
2017-11-14	25751625	Michailidou K	2015-04-01	Nat Genet	www.ncbi.nlm.nih.gov/pubmed/25751625	Genome-wide association analysis of more than 120,000 individuals identifies 15 new susceptibility loci for breast cancer.	Breast cancer	15,748 European ancestry cases, 18,084 European ancestry controls	46,785 European ancestry cases, 42,892 European ancestry controls	13q13.1	13	32398489	y	NR	BRCA2			675			rs11571833-T	rs11571833	0	11571833	stop_gained	0	0.01	6e-07	6.22185		1.27	[1.15-1.4]	Affymetrix, Illumina [~ 11600000] (imputed)	N
2017-12-19	29058716	Milne RL	2017-10-23	Nat Genet	www.ncbi.nlm.nih.gov/pubmed/29058716	Identification of ten variants associated with risk of estrogen-receptor-negative breast cancer.	Breast cancer (estrogen-receptor negative)	14,135 European ancestry cases, 58,126 European ancestry controls	7,333 European ancestry cases, 42,468 European ancestry controls	13q13.1	13	32398489	y	NR	BRCA2			675			rs11571833-T	rs11571833	0	11571833	stop_gained	0	0.01	2e-13	12.699		1.58	[1.35-1.84] (Oncoarray)	Illumina [~ 11500000] (imputed)	N
2017-03-31	27117709	Couch FJ	2016-04-27	Nat Commun	www.ncbi.nlm.nih.gov/pubmed/27117709	Identification of four novel susceptibility loci for oestrogen receptor negative breast cancer.	Breast cancer (estrogen-receptor negative)	4,939 European ancestry cases, 14,352 European ancestry controls	7,333 European ancestry cases, 42,468 European ancestry controls	13q13.1	13	32398489	y	NR	BRCA2			675			rs11571833-?	rs11571833	0	11571833	stop_gained	0	0.01	6e-06	5.22185		1.32	[1.20-1.43]	Illumina [10909381] (imputed)	N
2017-11-30	29059683	Michailidou K	2017-10-23	Nature	www.ncbi.nlm.nih.gov/pubmed/29059683	Association analysis identifies 65 new breast cancer risk loci.	Breast cancer	76,192 European ancestry cases, 63,082 European ancestry controls	46,785 European ancestry cases, 42,892 European ancestry controls, 14,068 East Asian ancestry cases, 13,104 East Asian ancestry controls	19q13.42	19	55305310	y	NR	BRSK1			84446			rs1172821-T	rs1172821	0	1172821	intron_variant	0	0.3632	4e-06	5.39794	(EA)	0.0297	[0.017-0.042] unit decrease	Illumina [~ 11800000] (imputed)	N
2017-11-30	29059683	Michailidou K	2017-10-23	Nature	www.ncbi.nlm.nih.gov/pubmed/29059683	Association analysis identifies 65 new breast cancer risk loci.	Breast cancer	76,192 European ancestry cases, 63,082 European ancestry controls	46,785 European ancestry cases, 42,892 European ancestry controls, 14,068 East Asian ancestry cases, 13,104 East Asian ancestry controls	6p22.2	6	26463346	y	NR	BTN2A1			11120			rs13195401-T	rs13195401	0	13195401	missense_variant	0	0.0874	2e-09	8.69897	(EA)	0.0718	[0.048-0.095] unit decrease	Illumina [~ 11800000] (imputed)	N
2017-11-30	29059683	Michailidou K	2017-10-23	Nature	www.ncbi.nlm.nih.gov/pubmed/29059683	Association analysis identifies 65 new breast cancer risk loci.	Breast cancer	76,192 European ancestry cases, 63,082 European ancestry controls	46,785 European ancestry cases, 42,892 European ancestry controls, 14,068 East Asian ancestry cases, 13,104 East Asian ancestry controls	11q13.2	11	66843174	y	NR	C11orf80			79703			rs7570-C	rs7570	0	7570	synonymous_variant	0	0.2653	8e-06	5.09691	(EA)	0.0319	[0.018-0.046] unit increase	Illumina [~ 11800000] (imputed)	N
2017-11-30	29059683	Michailidou K	2017-10-23	Nature	www.ncbi.nlm.nih.gov/pubmed/29059683	Association analysis identifies 65 new breast cancer risk loci.	Breast cancer	76,192 European ancestry cases, 63,082 European ancestry controls	46,785 European ancestry cases, 42,892 European ancestry controls, 14,068 East Asian ancestry cases, 13,104 East Asian ancestry controls	20p12.3	20	5791630	y	NR	C20orf196			149840			rs73077323-A	rs73077323	0	73077323	intron_variant	0	0.0999	5e-06	5.30103	(EA)	0.0563	[0.032-0.08] unit decrease	Illumina [~ 11800000] (imputed)	N
2017-11-30	29059683	Michailidou K	2017-10-23	Nature	www.ncbi.nlm.nih.gov/pubmed/29059683	Association analysis identifies 65 new breast cancer risk loci.	Breast cancer	76,192 European ancestry cases, 63,082 European ancestry controls	46,785 European ancestry cases, 42,892 European ancestry controls, 14,068 East Asian ancestry cases, 13,104 East Asian ancestry controls	5p15.33	5	2777197	y	NR	C5orf38 - LOC100130748	153571	100130748		18621	10054	rs7709328-A	rs7709328	0	7709328	intergenic_variant	1	0.4164	3e-07	6.52288	(EA)	0.0327	[0.02-0.045] unit increase	Illumina [~ 11800000] (imputed)	N
2017-11-30	29059683	Michailidou K	2017-10-23	Nature	www.ncbi.nlm.nih.gov/pubmed/29059683	Association analysis identifies 65 new breast cancer risk loci.	Breast cancer	76,192 European ancestry cases, 63,082 European ancestry controls	46,785 European ancestry cases, 42,892 European ancestry controls, 14,068 East Asian ancestry cases, 13,104 East Asian ancestry controls	9q22.32	9	95008323	y	NR	C9orf3			84909			rs7862618-A	rs7862618	0	7862618	intron_variant	0	0.0134	5e-06	5.30103	(EA)	0.1381	[0.079-0.197] unit decrease	Illumina [~ 11800000] (imputed)	N
2015-04-01	25038754	Cai Q	2014-07-20	Nat Genet	www.ncbi.nlm.nih.gov/pubmed/25038754	Genome-wide association analysis in East Asians identifies breast cancer susceptibility loci at 1q32.1, 5q14.3 and 15q26.1.	Breast cancer	2,867 Chinese ancestry cases, 2,285 Chinese ancestry controls, 2,246 Korean ancestry cases, 2,052 Korean ancestry controls	5,029 Chinese ancestry cases, 5,302 Chinese ancestry controls, 6,066 Korean ancestry cases, 8,003 Korean ancestry controls, 6,572 Japanese ancestry cases, 6,539 Japanese ancestry controls, 16,003 European ancestry cases, 41,335 European ancestry controls	18q11.2	18	23196687	y	NR	CABLES1			91768			rs11082321-A	rs11082321	0	11082321	intron_variant	0	0.21	7e-07	6.1549	(East Asian)	1.08	[NR]	Affymetrix [up to 1930412] (imputed)	N
2017-11-30	29059683	Michailidou K	2017-10-23	Nature	www.ncbi.nlm.nih.gov/pubmed/29059683	Association analysis identifies 65 new breast cancer risk loci.	Breast cancer	76,192 European ancestry cases, 63,082 European ancestry controls	46,785 European ancestry cases, 42,892 European ancestry controls, 14,068 East Asian ancestry cases, 13,104 East Asian ancestry controls	9q34.2	9	133463535	y	NR	CACFD1			11094			rs3124765-C	rs3124765	0	3124765	missense_variant	0	0.8475	2e-06	5.69897	(EA)	0.0437	[0.026-0.062] unit decrease	Illumina [~ 11800000] (imputed)	N
2017-11-30	29059683	Michailidou K	2017-10-23	Nature	www.ncbi.nlm.nih.gov/pubmed/29059683	Association analysis identifies 65 new breast cancer risk loci.	Breast cancer	76,192 European ancestry cases, 63,082 European ancestry controls	46,785 European ancestry cases, 42,892 European ancestry controls, 14,068 East Asian ancestry cases, 13,104 East Asian ancestry controls	6p22.3	6	21905495	y	NR	CASC15			401237			rs9350395-G	rs9350395	0	9350395	intron_variant	0	0.5936	3e-07	6.52288	(EA)	0.0323	[0.02-0.045] unit increase	Illumina [~ 11800000] (imputed)	N
2018-12-14	30323354	Lee JY	2018-10-15	Sci Rep	www.ncbi.nlm.nih.gov/pubmed/30323354	BRCA1/2-negative, high-risk breast cancers (BRCAX) for Asian women: genetic susceptibility loci and their potential impacts.	BRCA1/2-negative high-risk breast cancer	1,469 Korean ancestry cases, 5,979 Korean ancestry controls	NA	16q12.1	16	52565276	y	CASC16, TOX3	CASC16			643714			rs4784227-T	rs4784227	0	4784227	intron_variant	0	0.26	2e-09	8.69897		1.31	[NR]	Affymetrix, Illumina [3378933] (imputed)	N
2012-12-02	23001122	Orr N	2012-09-23	Nat Genet	www.ncbi.nlm.nih.gov/pubmed/23001122	Genome-wide association study identifies a common variant in RAD51B associated with male breast cancer risk.	Breast cancer (male)	823 European ancestry cases, 2,795 European ancestry controls	438 European ancestry cases, 474 European ancestry controls	16q12.1	16	52552429	y	LOC643174, TOX3	CASC16			643714			rs3803662-?	rs3803662	0	3803662	non_coding_transcript_exon_variant	0	NR	4e-15	14.3979		1.5	[1.35-1.66]	Illumina [447760]	N
2017-11-14	25751625	Michailidou K	2015-04-01	Nat Genet	www.ncbi.nlm.nih.gov/pubmed/25751625	Genome-wide association analysis of more than 120,000 individuals identifies 15 new susceptibility loci for breast cancer.	Breast cancer	15,748 European ancestry cases, 18,084 European ancestry controls	46,785 European ancestry cases, 42,892 European ancestry controls	16q12.1	16	52552429	y	NR	CASC16			643714			rs3803662-A	rs3803662	0	3803662	non_coding_transcript_exon_variant	0	0.26	4e-117	116.398		1.24	[1.21-1.26]	Affymetrix, Illumina [~ 11600000] (imputed)	N
2017-12-19	29058716	Milne RL	2017-10-23	Nat Genet	www.ncbi.nlm.nih.gov/pubmed/29058716	Identification of ten variants associated with risk of estrogen-receptor-negative breast cancer.	Breast cancer (estrogen-receptor negative)	14,135 European ancestry cases, 58,126 European ancestry controls	7,333 European ancestry cases, 42,468 European ancestry controls	16q12.1	16	52565276	y	NR	CASC16			643714			rs4784227-T	rs4784227	0	4784227	intron_variant	0	0.24	2e-26	25.699		1.14	[1.10-1.19] (Oncoarray)	Illumina [~ 11500000] (imputed)	N
2008-06-16	17529974	Stacey SN	2007-05-27	Nat Genet	www.ncbi.nlm.nih.gov/pubmed/17529974	Common variants on chromosomes 2q35 and 16q12 confer susceptibility to estrogen receptor-positive breast cancer.	Breast cancer	1,599 European ancestry cases, 11,546 European ancestry controls	2,954 European ancestry cases, 5,967 European ancestry controls, Up to 561 Japanese ancestry cases, Up to 565 Japanese ancestry control, Up to 422 African American cases, Up to 448 African American controls, Up to 418 Hispanic cases, Up to 422 Hispanic controls, Up to 148 cases, Up to 293 controls	16q12.1	16	52552429	y	TNRC9	CASC16			643714			rs3803662-T	rs3803662	0	3803662	non_coding_transcript_exon_variant	0	0.27	6e-19	18.2218		1.28	[1.21-1.35]	Illumina [311524]	N
2008-06-16	17529967	Easton DF	2007-05-27	Nature	www.ncbi.nlm.nih.gov/pubmed/17529967	Genome-wide association study identifies novel breast cancer susceptibility loci.	Breast cancer	390 European ancestry cases, 364 European ancestry controls	4,364 East Asian ancestry cases, 24,174 European ancestry controls, 3,564 East Asian ancestry controls, 24,391 European ancestry controls	16q12.1	16	52552429	y	TNRC9, LOC643714	CASC16			643714			rs3803662-T	rs3803662	0	3803662	non_coding_transcript_exon_variant	0	0.25	1e-36	36		1.2	[1.16-1.24]	Perlegen [205586]	N
2018-12-14	30323354	Lee JY	2018-10-15	Sci Rep	www.ncbi.nlm.nih.gov/pubmed/30323354	BRCA1/2-negative, high-risk breast cancers (BRCAX) for Asian women: genetic susceptibility loci and their potential impacts.	BRCA1/2-negative high-risk breast cancer	1,469 Korean ancestry cases, 5,979 Korean ancestry controls	NA	16q12.1	16	52565276	y	TOX3	CASC16			643714			rs4784227-T	rs4784227	0	4784227	intron_variant	0	0.32	9e-09	8.04576		1.31	[1.19-1.44]	Affymetrix, Illumina [3378933] (imputed)	N
2017-11-30	29059683	Michailidou K	2017-10-23	Nature	www.ncbi.nlm.nih.gov/pubmed/29059683	Association analysis identifies 65 new breast cancer risk loci.	Breast cancer	76,192 European ancestry cases, 63,082 European ancestry controls	46,785 European ancestry cases, 42,892 European ancestry controls, 14,068 East Asian ancestry cases, 13,104 East Asian ancestry controls	16q12.1	16	52565276	y	TOX3	CASC16			643714			rs4784227-T	rs4784227	0	4784227	intron_variant	0	0.24	7e-201	200.155		1.23	[1.2-1.25] (Oncoarray)	Illumina [~ 11800000] (imputed)	N
2010-10-15	20872241	Li J	2010-09-26	Breast Cancer Res Treat	www.ncbi.nlm.nih.gov/pubmed/20872241	A combined analysis of genome-wide association studies in breast cancer.	Breast cancer	2,702 European ancestry female cases, 5,726 European ancestry controls	Up to 7,386 cases, 7,576 controls	16q12.1	16	52552429	y	TOX3	CASC16			643714			rs3803662-A	rs3803662	0	3803662	non_coding_transcript_exon_variant	0	0.3	4e-07	6.39794		1.22	[1.13-1.32]	Illumina [285984]	N
2015-04-19	21263130	Fletcher O	2011-01-24	J Natl Cancer Inst	www.ncbi.nlm.nih.gov/pubmed/21263130	Novel breast cancer susceptibility locus at 9q31.2: results of a genome-wide association study.	Breast cancer	2,839 European ancestry cases, 3,507 European ancestry controls	9,041 European ancestry cases, 8,980 European ancestry controls	16q12.2	16	52601252	y	TOX3	CASC16			643714			rs3112612-T	rs3112612	0	3112612	intron_variant	0	0.43	4e-10	9.39794		1.15	[1.10-1.21]	Illumina [~ 296114]	N
2009-04-03	19330030	Thomas G	2009-03-29	Nat Genet	www.ncbi.nlm.nih.gov/pubmed/19330030	A multistage genome-wide association study in breast cancer identifies two new risk alleles at 1p11.2 and 14q24.1 (RAD51L1).	Breast cancer	1,145 European ancestry cases, 1,142 European ancestry controls	8,625 European ancestry cases, 9,657 European ancestry controls	16q12.1	16	52552429	y	TOX3	CASC16			643714			rs3803662-T	rs3803662	0	3803662	non_coding_transcript_exon_variant	0	0.27	1e-09	9		1.16	[1.07-1.27] (Het)	Illumina [528173]	N
2013-09-12	23535733	Garcia-Closas M	2013-04-01	Nat Genet	www.ncbi.nlm.nih.gov/pubmed/23535733	Genome-wide association studies identify four ER negative-specific breast cancer risk loci.	Breast cancer	4,193 European ancestry cases, 35,194 European ancestry controls	6,514 European ancestry cases, 41,455 European ancestry controls	16q12.1	16	52552429	y	TOX3	CASC16			643714			rs3803662-T	rs3803662	0	3803662	non_coding_transcript_exon_variant	0	0.267	6e-13	12.2218		1.14	[1.10-1.18]	Illumina [NR]	N
2010-06-02	20453838	Turnbull C	2010-05-09	Nat Genet	www.ncbi.nlm.nih.gov/pubmed/20453838	Genome-wide association study identifies five new breast cancer susceptibility loci.	Breast cancer	3,659 European ancestry cases, 4,897 European ancestry controls	12,576 European ancestry cases, 12,223 European ancestry controls	16q12.1	16	52552429	y	TOX3	CASC16			643714			rs3803662-A	rs3803662	0	3803662	non_coding_transcript_exon_variant	0	0.26	3e-15	14.5229		1.3	[1.22-1.39]	Illumina [582886]	N
2010-07-12	20585626	Long J	2010-06-24	PLoS Genet	www.ncbi.nlm.nih.gov/pubmed/20585626	Identification of a functional genetic variant at 16q12.1 for breast cancer risk: results from the Asia Breast Cancer Consortium.	Breast cancer	2,073 Chinese ancestry cases, 2,084 Chinese ancestry controls	15,159 East Asian ancestry cases, 12,993 East Asian ancestry controls, 2,797 European ancestry cases, 2,662 European ancestry controls	16q12.1	16	52565276	y	TOX3	CASC16			643714			rs4784227-T	rs4784227	0	4784227	intron_variant	0	0.24	1e-28	28	(all races combined)	1.24	[1.20-1.29]	Affymetrix [684457]	N
2013-09-12	23535729	Michailidou K	2013-04-01	Nat Genet	www.ncbi.nlm.nih.gov/pubmed/23535729	Large-scale genotyping identifies 41 new loci associated with breast cancer risk.	Breast cancer	10,052 European ancestry cases, 12,575 European ancestry controls	45,290 European ancestry cases, 41,880 European ancestry controls	16q12.1	16	52552429	y	TOX3	CASC16			643714			rs3803662-A	rs3803662	0	3803662	non_coding_transcript_exon_variant	0	0.26	2e-114	113.699		1.24	[1.21-1.27]	Affymetrix, Illumina [~ 2600000] (imputed)	N
2015-05-16	25327703	Fejerman L	2014-10-20	Nat Commun	www.ncbi.nlm.nih.gov/pubmed/25327703	Genome-wide association study of breast cancer in Latinas identifies novel protective variants on 6q25.	Breast cancer	1,497 Latino cases, 3,213 Latino controls	1,643 Latino cases, 4,971 Latino controls	16q12.1	16	52565276	y	TOX3	CASC16			643714			rs4784227-T	rs4784227	0	4784227	intron_variant	0	0.31	3e-09	8.52288		1.38	[1.24-1.54]	Affymetrix, Illumina [7229558] (imputed)	N
2017-03-31	27117709	Couch FJ	2016-04-27	Nat Commun	www.ncbi.nlm.nih.gov/pubmed/27117709	Identification of four novel susceptibility loci for oestrogen receptor negative breast cancer.	Breast cancer	4,939 European ancestry estrogen receptor-negative cases, 14,352 European ancestry controls	7,333 European ancestry estrogen receptor-negative cases, 7,797 European ancestry BRCA1 mutation carrier cases, 7,455 European ancestry BRCA1 mutation carrier controls, 42,468 European ancestry controls	16q12.1	16	52565276	y	TOX3	CASC16			643714			rs4784227-?	rs4784227	0	4784227	intron_variant	0	0.26	6e-15	14.2218		1.07	[1.02-1.12] (BRCA1 carriers)	Illumina [10909381] (imputed)	N
2017-03-31	27117709	Couch FJ	2016-04-27	Nat Commun	www.ncbi.nlm.nih.gov/pubmed/27117709	Identification of four novel susceptibility loci for oestrogen receptor negative breast cancer.	Breast cancer (estrogen-receptor negative)	4,939 European ancestry cases, 14,352 European ancestry controls	7,333 European ancestry cases, 42,468 European ancestry controls	16q12.1	16	52565276	y	TOX3	CASC16			643714			rs4784227-?	rs4784227	0	4784227	intron_variant	0	0.24	1e-14	14		1.15	[1.11-1.19]	Illumina [10909381] (imputed)	N
2014-04-10	24143190	Low SK	2013-10-15	PLoS One	www.ncbi.nlm.nih.gov/pubmed/24143190	Genome-wide association study of breast cancer in the Japanese population.	Breast cancer	2,642 Japanese ancestry cases, 2,099 Japanese ancestry controls	2,885 Japanese ancestry cases, 3,395 Japanese ancestry controls	16q12.2	16	52601088	y	TOX3, LOC643714	CASC16			643714			rs12922061-T	rs12922061	0	12922061	intron_variant	0	0.241	4e-10	9.39794		1.231	[1.153-1.314]	Illumina [5335291] (imputed)	N
2014-04-10	24143190	Low SK	2013-10-15	PLoS One	www.ncbi.nlm.nih.gov/pubmed/24143190	Genome-wide association study of breast cancer in the Japanese population.	Breast cancer	2,642 Japanese ancestry cases, 2,099 Japanese ancestry controls	2,885 Japanese ancestry cases, 3,395 Japanese ancestry controls	16q12.1	16	52552429	y	TOX3, LOC643714	CASC16			643714			rs3803662-T	rs3803662	0	3803662	non_coding_transcript_exon_variant	0	0.522	3e-11	10.5229		1.213	[1.146-1.284]	Illumina [5335291] (imputed)	N
2017-11-30	29059683	Michailidou K	2017-10-23	Nature	www.ncbi.nlm.nih.gov/pubmed/29059683	Association analysis identifies 65 new breast cancer risk loci.	Breast cancer	76,192 European ancestry cases, 63,082 European ancestry controls	46,785 European ancestry cases, 42,892 European ancestry controls, 14,068 East Asian ancestry cases, 13,104 East Asian ancestry controls	2q33.1	2	201258707	y	NR	CASP8			841			rs3769821-T	rs3769821	0	3769821	intron_variant	0	0.6683	4e-18	17.3979	(EA)	0.0565	[0.044-0.069] unit decrease	Illumina [~ 11800000] (imputed)	N
2017-11-30	29059683	Michailidou K	2017-10-23	Nature	www.ncbi.nlm.nih.gov/pubmed/29059683	Association analysis identifies 65 new breast cancer risk loci.	Breast cancer	76,192 European ancestry cases, 63,082 European ancestry controls	46,785 European ancestry cases, 42,892 European ancestry controls, 14,068 East Asian ancestry cases, 13,104 East Asian ancestry controls	1p36.22	1	10637822	y	NR	CASZ1			54897			rs199867187-G	rs199867187	0	199867187	3_prime_UTR_variant	0	0.2745	1e-06	6	(EA)	0.0381	[0.023-0.054] unit increase	Illumina [~ 11800000] (imputed)	N
2017-11-30	29059683	Michailidou K	2017-10-23	Nature	www.ncbi.nlm.nih.gov/pubmed/29059683	Association analysis identifies 65 new breast cancer risk loci.	Breast cancer	76,192 European ancestry cases, 63,082 European ancestry controls	46,785 European ancestry cases, 42,892 European ancestry controls, 14,068 East Asian ancestry cases, 13,104 East Asian ancestry controls	17q25.3	17	79807926	y	intergenic	CBX8 - LOC102723961	57332	102723961		10810	8017	rs745570-A	rs745570	0	745570	intergenic_variant	1	0.5	4e-10	9.39794	(EA)	1.03	[1.01-1.05] (Oncoarray)	Illumina [~ 11800000] (imputed)	N
2017-11-14	25751625	Michailidou K	2015-04-01	Nat Genet	www.ncbi.nlm.nih.gov/pubmed/25751625	Genome-wide association analysis of more than 120,000 individuals identifies 15 new susceptibility loci for breast cancer.	Breast cancer	15,748 European ancestry cases, 18,084 European ancestry controls	46,785 European ancestry cases, 42,892 European ancestry controls	17q25.3	17	79807926	y	Intergenic	CBX8 - LOC102723961	57332	102723961		10810	8017	rs745570-A	rs745570	0	745570	intergenic_variant	1	0.5	1e-09	9		1.05263	[1.03-1.08]	Affymetrix, Illumina [~ 11600000] (imputed)	N
2017-11-30	29059683	Michailidou K	2017-10-23	Nature	www.ncbi.nlm.nih.gov/pubmed/29059683	Association analysis identifies 65 new breast cancer risk loci.	Breast cancer	76,192 European ancestry cases, 63,082 European ancestry controls	46,785 European ancestry cases, 42,892 European ancestry controls, 14,068 East Asian ancestry cases, 13,104 East Asian ancestry controls	17q25.3	17	79797749	y	NR	CBX8 - LOC102723961	57332	102723961		633	18194	rs8082452-G	rs8082452	0	8082452	intron_variant	1	0.4562	1e-10	10	(EA)	0.0418	[0.029-0.055] unit decrease	Illumina [~ 11800000] (imputed)	N
2017-03-31	27117709	Couch FJ	2016-04-27	Nat Commun	www.ncbi.nlm.nih.gov/pubmed/27117709	Identification of four novel susceptibility loci for oestrogen receptor negative breast cancer.	Breast cancer	4,939 European ancestry estrogen receptor-negative cases, 14,352 European ancestry controls	7,333 European ancestry estrogen receptor-negative cases, 7,797 European ancestry BRCA1 mutation carrier cases, 7,455 European ancestry BRCA1 mutation carrier controls, 42,468 European ancestry controls	17q25.3	17	79807926	y	NR	CBX8 - LOC102723961	57332	102723961		10810	8017	rs745570-?	rs745570	0	745570	intergenic_variant	1	0.51	6e-06	5.22185		1.04167	[1-1.09] (BRCA1 carriers)	Illumina [10909381] (imputed)	N
2017-11-30	29059683	Michailidou K	2017-10-23	Nature	www.ncbi.nlm.nih.gov/pubmed/29059683	Association analysis identifies 65 new breast cancer risk loci.	Breast cancer	76,192 European ancestry cases, 63,082 European ancestry controls	46,785 European ancestry cases, 42,892 European ancestry controls, 14,068 East Asian ancestry cases, 13,104 East Asian ancestry controls	18q22.2	18	69220817	y	NR	CCDC102B - LOC107985135	79839	107985135		6467	65289	rs17080623-G	rs17080623	0	17080623	intergenic_variant	1	0.2314	5e-06	5.30103	(EA)	0.0344	[0.02-0.049] unit increase	Illumina [~ 11800000] (imputed)	N
2017-11-30	29059683	Michailidou K	2017-10-23	Nature	www.ncbi.nlm.nih.gov/pubmed/29059683	Association analysis identifies 65 new breast cancer risk loci.	Breast cancer	76,192 European ancestry cases, 63,082 European ancestry controls	46,785 European ancestry cases, 42,892 European ancestry controls, 14,068 East Asian ancestry cases, 13,104 East Asian ancestry controls	22q13.2	22	41815785	y	NR	CCDC134			79879			rs8137282-G	rs8137282	0	8137282	intron_variant	0	0.0421	2e-07	6.69897	(EA)	0.0882	[0.055-0.121] unit increase	Illumina [~ 11800000] (imputed)	N
2017-11-30	29059683	Michailidou K	2017-10-23	Nature	www.ncbi.nlm.nih.gov/pubmed/29059683	Association analysis identifies 65 new breast cancer risk loci.	Breast cancer	76,192 European ancestry cases, 63,082 European ancestry controls	46,785 European ancestry cases, 42,892 European ancestry controls, 14,068 East Asian ancestry cases, 13,104 East Asian ancestry controls	6q25.1	6	151621059	y	ESR1	CCDC170			80129			rs3757322-G	rs3757322	0	3757322	3_prime_UTR_variant	0	0.32	3e-41	40.5229		1.08	[1.06-1.1] (Oncoarray)	Illumina [~ 11800000] (imputed)	N
2015-04-19	21263130	Fletcher O	2011-01-24	J Natl Cancer Inst	www.ncbi.nlm.nih.gov/pubmed/21263130	Novel breast cancer susceptibility locus at 9q31.2: results of a genome-wide association study.	Breast cancer	2,839 European ancestry cases, 3,507 European ancestry controls	9,041 European ancestry cases, 8,980 European ancestry controls	6q25.1	6	151618215	y	ESR1	CCDC170			80129			rs3734805-C	rs3734805	0	3734805	3_prime_UTR_variant	0	0.08	1e-07	7		1.19	[1.11-1.27]	Illumina [~ 296114]	N
2013-09-12	23535729	Michailidou K	2013-04-01	Nat Genet	www.ncbi.nlm.nih.gov/pubmed/23535729	Large-scale genotyping identifies 41 new loci associated with breast cancer risk.	Breast cancer	10,052 European ancestry cases, 12,575 European ancestry controls	45,290 European ancestry cases, 41,880 European ancestry controls	6q25.1	6	151592978	y	ESR1	CCDC170			80129			rs3757318-A	rs3757318	0	3757318	intron_variant	0	0.07	2e-21	20.699		1.16	[1.12-1.21]	Affymetrix, Illumina [~ 2600000] (imputed)	N
2017-03-31	27117709	Couch FJ	2016-04-27	Nat Commun	www.ncbi.nlm.nih.gov/pubmed/27117709	Identification of four novel susceptibility loci for oestrogen receptor negative breast cancer.	Breast cancer	4,939 European ancestry estrogen receptor-negative cases, 14,352 European ancestry controls	7,333 European ancestry estrogen receptor-negative cases, 7,797 European ancestry BRCA1 mutation carrier cases, 7,455 European ancestry BRCA1 mutation carrier controls, 42,468 European ancestry controls	6q25.1	6	151597721	y	ESR1	CCDC170			80129			rs12662670-?	rs12662670	0	12662670	intron_variant	0	0.09	1e-19	19		1.19	[1.11-1.27] (BRCA1 carriers)	Illumina [10909381] (imputed)	N
2017-12-19	29058716	Milne RL	2017-10-23	Nat Genet	www.ncbi.nlm.nih.gov/pubmed/29058716	Identification of ten variants associated with risk of estrogen-receptor-negative breast cancer.	Breast cancer (estrogen-receptor negative)	14,135 European ancestry cases, 58,126 European ancestry controls	7,333 European ancestry cases, 42,468 European ancestry controls	6q25.1	6	151621059	y	ESR1	CCDC170			80129			rs3757322-G	rs3757322	0	3757322	3_prime_UTR_variant	0	0.32	3e-31	30.5229		1.15	[1.12-1.18]	Illumina [~ 11500000] (imputed)	N
2017-03-31	27117709	Couch FJ	2016-04-27	Nat Commun	www.ncbi.nlm.nih.gov/pubmed/27117709	Identification of four novel susceptibility loci for oestrogen receptor negative breast cancer.	Breast cancer (estrogen-receptor negative)	4,939 European ancestry cases, 14,352 European ancestry controls	7,333 European ancestry cases, 42,468 European ancestry controls	6q25.1	6	151597721	y	ESR1	CCDC170			80129			rs12662670-?	rs12662670	0	12662670	intron_variant	0	0.08	9e-15	14.0458		1.2	[1.18-1.32]	Illumina [10909381] (imputed)	N
2014-07-29	24325915	Purrington KS	2013-12-09	Carcinogenesis	www.ncbi.nlm.nih.gov/pubmed/24325915	Genome-wide association study identifies 25 known breast cancer susceptibility loci as risk factors for triple-negative breast cancer.	Breast cancer (estrogen-receptor negative, progesterone-receptor negative, and human epidermal growth factor-receptor negative)	1,529 European ancestry cases, 3,399 European ancestry controls	2,148 European ancestry cases, 1,309 European ancestry controls	6q25.1	6	151592978	y	ESR1	CCDC170			80129			rs3757318-A	rs3757318	0	3757318	intron_variant	0		9e-06	5.04576		1.33	[1.17-1.51]	Illumina [NR] (imputed)	N
2017-12-19	29058716	Milne RL	2017-10-23	Nat Genet	www.ncbi.nlm.nih.gov/pubmed/29058716	Identification of ten variants associated with risk of estrogen-receptor-negative breast cancer.	Breast Cancer in BRCA1 mutation carriers	7,784 European ancestry carrier cases, 7,782 European ancestry carrier controls	1,630 European ancestry carrier cases, 1,712 European ancestry carrier controls	6q25.1	6	151621059	y	ESR1	CCDC170			80129			rs3757322-G	rs3757322	0	3757322	3_prime_UTR_variant	0	0.32	3e-12	11.5229		1.14	[1.10-1.19]	Illumina [~ 11500000] (imputed)	N
2010-06-02	20453838	Turnbull C	2010-05-09	Nat Genet	www.ncbi.nlm.nih.gov/pubmed/20453838	Genome-wide association study identifies five new breast cancer susceptibility loci.	Breast cancer	3,659 European ancestry cases, 4,897 European ancestry controls	12,576 European ancestry cases, 12,223 European ancestry controls	6q25.1	6	151592978	y	ESR1, C6orf97	CCDC170			80129			rs3757318-A	rs3757318	0	3757318	intron_variant	0	0.07	3e-06	5.52288		1.3	[1.17-1.46]	Illumina [582886]	N
2017-11-14	25751625	Michailidou K	2015-04-01	Nat Genet	www.ncbi.nlm.nih.gov/pubmed/25751625	Genome-wide association analysis of more than 120,000 individuals identifies 15 new susceptibility loci for breast cancer.	Breast cancer	15,748 European ancestry cases, 18,084 European ancestry controls	46,785 European ancestry cases, 42,892 European ancestry controls	6q25.1	6	151597721	y	NR	CCDC170			80129			rs12662670-G	rs12662670	0	12662670	intron_variant	0	0.07	7e-27	26.1549		1.17	[1.13-1.22]	Affymetrix, Illumina [~ 11600000] (imputed)	N
2017-01-10	27354352	Han MR	2016-06-27	Hum Mol Genet	www.ncbi.nlm.nih.gov/pubmed/27354352	Genome-wide association study in East Asians identifies two novel breast cancer susceptibility loci.	Breast cancer	7,619 East Asian ancestry cases, 6,286 East Asian ancestry controls	6,605 East Asian ancestry cases, 8,543 East Asian ancestry controls	6q25.1	6	151592978	y		CCDC170			80129			rs3757318-A	rs3757318	0	3757318	intron_variant	0	0.26	1e-06	6		1.15	[1.09-1.22]	Affymetrix, Illumina [668499] (imputed)	N
2018-12-14	30323354	Lee JY	2018-10-15	Sci Rep	www.ncbi.nlm.nih.gov/pubmed/30323354	BRCA1/2-negative, high-risk breast cancers (BRCAX) for Asian women: genetic susceptibility loci and their potential impacts.	BRCA1/2-negative high-risk breast cancer	1,469 Korean ancestry cases, 5,979 Korean ancestry controls	NA	6q25.1	6	151623479	y	CCDC170, ESR1	CCDC170 - ESR1	80129	2099		2286	30669	rs9383936-A	rs9383936	0	9383936	intergenic_variant	1	0.34	1e-10	10		1.35	[1.23-1.48]	Affymetrix, Illumina [3378933] (imputed)	N
2018-12-14	30323354	Lee JY	2018-10-15	Sci Rep	www.ncbi.nlm.nih.gov/pubmed/30323354	BRCA1/2-negative, high-risk breast cancers (BRCAX) for Asian women: genetic susceptibility loci and their potential impacts.	BRCA1/2-negative high-risk breast cancer	1,469 Korean ancestry cases, 5,979 Korean ancestry controls	NA	6q25.1	6	151627231	y	CCDC170, ESR1	CCDC170 - ESR1	80129	2099		6038	26917	rs2046210-A	rs2046210	0	2046210	intergenic_variant	1	0.36	1e-09	9		1.3	[NR]	Affymetrix, Illumina [3378933] (imputed)	N
2017-11-30	29059683	Michailidou K	2017-10-23	Nature	www.ncbi.nlm.nih.gov/pubmed/29059683	Association analysis identifies 65 new breast cancer risk loci.	Breast cancer	76,192 European ancestry cases, 63,082 European ancestry controls	46,785 European ancestry cases, 42,892 European ancestry controls, 14,068 East Asian ancestry cases, 13,104 East Asian ancestry controls	6q25.1	6	151631197	y	ESR1	CCDC170 - ESR1	80129	2099		10004	22951	rs9397437-A	rs9397437	0	9397437	intergenic_variant	1	0.07	5e-54	53.301		1.17	[1.14-1.21] (Oncoarray)	Illumina [~ 11800000] (imputed)	N
2013-09-12	23535733	Garcia-Closas M	2013-04-01	Nat Genet	www.ncbi.nlm.nih.gov/pubmed/23535733	Genome-wide association studies identify four ER negative-specific breast cancer risk loci.	Breast cancer	4,193 European ancestry cases, 35,194 European ancestry controls	6,514 European ancestry cases, 41,455 European ancestry controls	6q25.1	6	151627231	y	ESR1	CCDC170 - ESR1	80129	2099		6038	26917	rs2046210-A	rs2046210	0	2046210	intergenic_variant	1	0.423	5e-16	15.301		1.15	[1.11-1.19]	Illumina [NR]	N
2015-05-16	25327703	Fejerman L	2014-10-20	Nat Commun	www.ncbi.nlm.nih.gov/pubmed/25327703	Genome-wide association study of breast cancer in Latinas identifies novel protective variants on 6q25.	Breast cancer	1,497 Latino cases, 3,213 Latino controls	1,643 Latino cases, 4,971 Latino controls	6q25.1	6	151633699	y	ESR1	CCDC170 - ESR1	80129	2099		12506	20449	rs140068132-A	rs140068132	0	140068132	intergenic_variant	1	0.93	9e-18	17.0458		1.67	[1.49-1.89]	Affymetrix, Illumina [7229558] (imputed)	N
2017-03-31	27117709	Couch FJ	2016-04-27	Nat Commun	www.ncbi.nlm.nih.gov/pubmed/27117709	Identification of four novel susceptibility loci for oestrogen receptor negative breast cancer.	Breast cancer	4,939 European ancestry estrogen receptor-negative cases, 14,352 European ancestry controls	7,333 European ancestry estrogen receptor-negative cases, 7,797 European ancestry BRCA1 mutation carrier cases, 7,455 European ancestry BRCA1 mutation carrier controls, 42,468 European ancestry controls	6q25.1	6	151625017	y	ESR1	CCDC170 - ESR1	80129	2099		3824	29131	rs11155804-?	rs11155804	0	11155804	intergenic_variant	1	0.36	4e-28	27.3979		1.15	[1.11-1.20] (BRCA1 carriers)	Illumina [10909381] (imputed)	N
2017-03-31	27117709	Couch FJ	2016-04-27	Nat Commun	www.ncbi.nlm.nih.gov/pubmed/27117709	Identification of four novel susceptibility loci for oestrogen receptor negative breast cancer.	Breast cancer (estrogen-receptor negative)	4,939 European ancestry cases, 14,352 European ancestry controls	7,333 European ancestry cases, 42,468 European ancestry controls	6q25.1	6	151625017	y	ESR1	CCDC170 - ESR1	80129	2099		3824	29131	rs11155804-?	rs11155804	0	11155804	intergenic_variant	1	0.34	8e-18	17.0969		1.16	[1.12-1.19]	Illumina [10909381] (imputed)	N
2009-02-28	19219042	Zheng W	2009-02-15	Nat Genet	www.ncbi.nlm.nih.gov/pubmed/19219042	Genome-wide association study identifies a new breast cancer susceptibility locus at 6q25.1.	Breast cancer	1,505 Chinese ancestry cases, 1,522 Chinese ancestry controls	5,026 Chinese ancestry cases, 2,476 Chinese ancestry controls, 1,591 European ancestry cases, 1,466 European ancestry controls	6q25.1	6	151627231	y	ESR1, C6orf97	CCDC170 - ESR1	80129	2099		6038	26917	rs2046210-A	rs2046210	0	2046210	intergenic_variant	1	0.37	2e-15	14.699		1.29	[1.21-1.37]	Affymetrix [up to 607728]	N
2013-08-02	23544013	Couch FJ	2013-03-27	PLoS Genet	www.ncbi.nlm.nih.gov/pubmed/23544013	Genome-wide association study in BRCA1 mutation carriers identifies novel loci associated with breast and ovarian cancer risk.	Breast Cancer in BRCA1 mutation carriers	1,426 European ancestry cases, 1,301 European ancestry controls	6,031 European ancestry cases, 5,933 European ancestry controls	6q25.1	6	151627231	y	intergenic	CCDC170 - ESR1	80129	2099		6038	26917	rs2046210-C	rs2046210	0	2046210	intergenic_variant	1	0.08	5e-09	8.30103		1.28	[1.18-1.39]	Illumina [2568349] (imputed)	N
2017-11-30	29059683	Michailidou K	2017-10-23	Nature	www.ncbi.nlm.nih.gov/pubmed/29059683	Association analysis identifies 65 new breast cancer risk loci.	Breast cancer	76,192 European ancestry cases, 63,082 European ancestry controls	46,785 European ancestry cases, 42,892 European ancestry controls, 14,068 East Asian ancestry cases, 13,104 East Asian ancestry controls	6q25.1	6	151634779	y	NR	CCDC170 - ESR1	80129	2099		13586	19369	rs60954078-G	rs60954078	0	60954078	intergenic_variant	1	0.07	3e-54	53.5229	(EA)	0.1817	[0.16-0.2] unit increase	Illumina [~ 11800000] (imputed)	N
2017-11-14	25751625	Michailidou K	2015-04-01	Nat Genet	www.ncbi.nlm.nih.gov/pubmed/25751625	Genome-wide association analysis of more than 120,000 individuals identifies 15 new susceptibility loci for breast cancer.	Breast cancer	15,748 European ancestry cases, 18,084 European ancestry controls	46,785 European ancestry cases, 42,892 European ancestry controls	6q25.1	6	151627231	y	NR	CCDC170 - ESR1	80129	2099		6038	26917	rs2046210-A	rs2046210	0	2046210	intergenic_variant	1	0.34	6e-24	23.2218		1.08	[1.06-1.1]	Affymetrix, Illumina [~ 11600000] (imputed)	N
2017-12-19	29058716	Milne RL	2017-10-23	Nat Genet	www.ncbi.nlm.nih.gov/pubmed/29058716	Identification of ten variants associated with risk of estrogen-receptor-negative breast cancer.	Breast cancer (estrogen-receptor negative)	14,135 European ancestry cases, 58,126 European ancestry controls	7,333 European ancestry cases, 42,468 European ancestry controls	6q25.1	6	151631197	y	NR	CCDC170 - ESR1	80129	2099		10004	22951	rs9397437-A	rs9397437	0	9397437	intergenic_variant	1	0.07	3e-40	39.5229		1.32	[1.25-1.40] (Oncoarray)	Illumina [~ 11500000] (imputed)	N
2017-12-19	29058716	Milne RL	2017-10-23	Nat Genet	www.ncbi.nlm.nih.gov/pubmed/29058716	Identification of ten variants associated with risk of estrogen-receptor-negative breast cancer.	Breast Cancer in BRCA1 mutation carriers	7,784 European ancestry carrier cases, 7,782 European ancestry carrier controls	1,630 European ancestry carrier cases, 1,712 European ancestry carrier controls	6q25.1	6	151631197	y	NR	CCDC170 - ESR1	80129	2099		10004	22951	rs9397437-A	rs9397437	0	9397437	intergenic_variant	1	0.07	6e-08	7.22185		1.2	[1.12-1.28]	Illumina [~ 11500000] (imputed)	N
2017-01-10	27354352	Han MR	2016-06-27	Hum Mol Genet	www.ncbi.nlm.nih.gov/pubmed/27354352	Genome-wide association study in East Asians identifies two novel breast cancer susceptibility loci.	Breast cancer	7,619 East Asian ancestry cases, 6,286 East Asian ancestry controls	6,605 East Asian ancestry cases, 8,543 East Asian ancestry controls	6q25.1	6	151627231	y		CCDC170 - ESR1	80129	2099		6038	26917	rs2046210-A	rs2046210	0	2046210	intergenic_variant	1	0.35	7e-15	14.1549		1.22	[1.16-1.29]	Affymetrix, Illumina [668499] (imputed)	N
2017-11-30	29059683	Michailidou K	2017-10-23	Nature	www.ncbi.nlm.nih.gov/pubmed/29059683	Association analysis identifies 65 new breast cancer risk loci.	Breast cancer	76,192 European ancestry cases, 63,082 European ancestry controls	46,785 European ancestry cases, 42,892 European ancestry controls, 14,068 East Asian ancestry cases, 13,104 East Asian ancestry controls	1p34.2	1	42592453	y	NR	CCDC30			728621			rs113319441-T	rs113319441	0	113319441	non_coding_transcript_exon_variant	0	0.0308	6e-06	5.22185	(EA)	0.0908	[0.051-0.13] unit decrease	Illumina [~ 11800000] (imputed)	N
2017-11-30	29059683	Michailidou K	2017-10-23	Nature	www.ncbi.nlm.nih.gov/pubmed/29059683	Association analysis identifies 65 new breast cancer risk loci.	Breast cancer	76,192 European ancestry cases, 63,082 European ancestry controls	46,785 European ancestry cases, 42,892 European ancestry controls, 14,068 East Asian ancestry cases, 13,104 East Asian ancestry controls	15q24.1	15	74300521	y	NR	CCDC33			80125			rs12904134-A	rs12904134	0	12904134	non_coding_transcript_exon_variant	0	0.501	8e-06	5.09691	(EA)	0.0286	[0.016-0.041] unit increase	Illumina [~ 11800000] (imputed)	N
2017-11-30	29059683	Michailidou K	2017-10-23	Nature	www.ncbi.nlm.nih.gov/pubmed/29059683	Association analysis identifies 65 new breast cancer risk loci.	Breast cancer	76,192 European ancestry cases, 63,082 European ancestry controls	46,785 European ancestry cases, 42,892 European ancestry controls, 14,068 East Asian ancestry cases, 13,104 East Asian ancestry controls	14q32.11	14	91374725	y	CCDC88C	CCDC88C			440193			rs941764-G	rs941764	0	941764	intron_variant	0	0.35	8e-13	12.0969	(EA)	1.03	[1.02-1.05] (Oncoarray)	Illumina [~ 11800000] (imputed)	N
2013-09-12	23535729	Michailidou K	2013-04-01	Nat Genet	www.ncbi.nlm.nih.gov/pubmed/23535729	Large-scale genotyping identifies 41 new loci associated with breast cancer risk.	Breast cancer	10,052 European ancestry cases, 12,575 European ancestry controls	45,290 European ancestry cases, 41,880 European ancestry controls	14q32.11	14	91374725	y	CCDC88C	CCDC88C			440193			rs941764-G	rs941764	0	941764	intron_variant	0	0.34	4e-10	9.39794		1.06	[1.04-1.09]	Affymetrix, Illumina [~ 2600000] (imputed)	N
2017-11-14	25751625	Michailidou K	2015-04-01	Nat Genet	www.ncbi.nlm.nih.gov/pubmed/25751625	Genome-wide association analysis of more than 120,000 individuals identifies 15 new susceptibility loci for breast cancer.	Breast cancer	15,748 European ancestry cases, 18,084 European ancestry controls	46,785 European ancestry cases, 42,892 European ancestry controls	14q32.11	14	91374725	y	NR	CCDC88C			440193			rs941764-G	rs941764	0	941764	intron_variant	0	0.34	6e-11	10.2218		1.07	[1.05-1.09]	Affymetrix, Illumina [~ 11600000] (imputed)	N
2017-11-30	29059683	Michailidou K	2017-10-23	Nature	www.ncbi.nlm.nih.gov/pubmed/29059683	Association analysis identifies 65 new breast cancer risk loci.	Breast cancer	76,192 European ancestry cases, 63,082 European ancestry controls	46,785 European ancestry cases, 42,892 European ancestry controls, 14,068 East Asian ancestry cases, 13,104 East Asian ancestry controls	5p12	5	43410515	y	NR	CCL28			56477			rs73098691-A	rs73098691	0	73098691	intron_variant	0	0.0681	3e-06	5.52288	(EA)	0.0689	[0.04-0.098] unit decrease	Illumina [~ 11800000] (imputed)	N
2017-11-30	29059683	Michailidou K	2017-10-23	Nature	www.ncbi.nlm.nih.gov/pubmed/29059683	Association analysis identifies 65 new breast cancer risk loci.	Breast cancer	76,192 European ancestry cases, 63,082 European ancestry controls	46,785 European ancestry cases, 42,892 European ancestry controls, 14,068 East Asian ancestry cases, 13,104 East Asian ancestry controls	11q13.3	11	69646918	y	NR	CCND1			595			rs34507830-T	rs34507830	0	34507830	intron_variant	0	0.0206	7e-31	30.1549	(EA)	0.2629	[0.22-0.31] unit increase	Illumina [~ 11800000] (imputed)	N
2017-11-30	29059683	Michailidou K	2017-10-23	Nature	www.ncbi.nlm.nih.gov/pubmed/29059683	Association analysis identifies 65 new breast cancer risk loci.	Breast cancer	76,192 European ancestry cases, 63,082 European ancestry controls	46,785 European ancestry cases, 42,892 European ancestry controls, 14,068 East Asian ancestry cases, 13,104 East Asian ancestry controls	4q22.1	4	91717049	y	NR	CCSER1 - KRT19P6	401145	106480807		114830	167997	rs9884765-C	rs9884765	0	9884765	intergenic_variant	1	0.3701	5e-07	6.30103	(EA)	0.0353	[0.022-0.049] unit increase	Illumina [~ 11800000] (imputed)	N
2017-11-30	29059683	Michailidou K	2017-10-23	Nature	www.ncbi.nlm.nih.gov/pubmed/29059683	Association analysis identifies 65 new breast cancer risk loci.	Breast cancer	76,192 European ancestry cases, 63,082 European ancestry controls	46,785 European ancestry cases, 42,892 European ancestry controls, 14,068 East Asian ancestry cases, 13,104 East Asian ancestry controls	1q21.1	1	145730328	y	NR	CD160			11126			rs1552172-A	rs1552172	0	1552172	intron_variant	0	0.3563	1e-08	8	(EA)	0.0382	[0.025-0.051] unit decrease	Illumina [~ 11800000] (imputed)	N
2017-11-30	29059683	Michailidou K	2017-10-23	Nature	www.ncbi.nlm.nih.gov/pubmed/29059683	Association analysis identifies 65 new breast cancer risk loci.	Breast cancer	76,192 European ancestry cases, 63,082 European ancestry controls	46,785 European ancestry cases, 42,892 European ancestry controls, 14,068 East Asian ancestry cases, 13,104 East Asian ancestry controls	5q12.3	5	67215707	y	NR	CD180 - LOC101928819	4064	101928819		18918	244938	rs1697139-G	rs1697139	0	1697139	regulatory_region_variant	1	0.5355	9e-06	5.04576	(EA)	0.028	[0.016-0.04] unit decrease	Illumina [~ 11800000] (imputed)	N
2017-11-30	29059683	Michailidou K	2017-10-23	Nature	www.ncbi.nlm.nih.gov/pubmed/29059683	Association analysis identifies 65 new breast cancer risk loci.	Breast cancer	76,192 European ancestry cases, 63,082 European ancestry controls	46,785 European ancestry cases, 42,892 European ancestry controls, 14,068 East Asian ancestry cases, 13,104 East Asian ancestry controls	1q32.2	1	207903511	y	NR	CD34			947			rs2724379-C	rs2724379	0	2724379	intron_variant	0	0.3341	2e-07	6.69897	(EA)	0.0346	[0.022-0.048] unit decrease	Illumina [~ 11800000] (imputed)	N
2017-11-30	29059683	Michailidou K	2017-10-23	Nature	www.ncbi.nlm.nih.gov/pubmed/29059683	Association analysis identifies 65 new breast cancer risk loci.	Breast cancer	76,192 European ancestry cases, 63,082 European ancestry controls	46,785 European ancestry cases, 42,892 European ancestry controls, 14,068 East Asian ancestry cases, 13,104 East Asian ancestry controls	1q32.2	1	207761731	y	NR	CD46			4179			rs5780403-CA	rs5780403	0	5780403	intron_variant	0	0.2059	9e-06	5.04576	(EA)	0.0378	[0.021-0.054] unit increase	Illumina [~ 11800000] (imputed)	N
2017-11-30	29059683	Michailidou K	2017-10-23	Nature	www.ncbi.nlm.nih.gov/pubmed/29059683	Association analysis identifies 65 new breast cancer risk loci.	Breast cancer	76,192 European ancestry cases, 63,082 European ancestry controls	46,785 European ancestry cases, 42,892 European ancestry controls, 14,068 East Asian ancestry cases, 13,104 East Asian ancestry controls	11p15.5	11	2369831	y	NR	CD81-AS1			101927682			rs800132-G	rs800132	0	800132	intron_variant	0	0.0493	8e-06	5.09691	(EA)	0.0689	[0.039-0.099] unit increase	Illumina [~ 11800000] (imputed)	N
2017-11-30	29059683	Michailidou K	2017-10-23	Nature	www.ncbi.nlm.nih.gov/pubmed/29059683	Association analysis identifies 65 new breast cancer risk loci.	Breast cancer	76,192 European ancestry cases, 63,082 European ancestry controls	46,785 European ancestry cases, 42,892 European ancestry controls, 14,068 East Asian ancestry cases, 13,104 East Asian ancestry controls	7p15.3	7	21901342	y	DNAH11, CDCA7L	CDCA7L, DNAH11			55536, 8701			rs7971-G	rs7971	0	7971	3_prime_UTR_variant	0	0.65	2e-08	7.69897	(EA)	1.04167	[1.02-1.06] (Oncoarray)	Illumina [~ 11800000] (imputed)	N
2017-11-30	29059683	Michailidou K	2017-10-23	Nature	www.ncbi.nlm.nih.gov/pubmed/29059683	Association analysis identifies 65 new breast cancer risk loci.	Breast cancer	76,192 European ancestry cases, 63,082 European ancestry controls	46,785 European ancestry cases, 42,892 European ancestry controls, 14,068 East Asian ancestry cases, 13,104 East Asian ancestry controls	5p14.3	5	22642425	y	NR	CDH12			1010			rs66783663-T	rs66783663	0	66783663	intron_variant	0	0.1419	5e-06	5.30103	(EA)	0.0408	[0.023-0.058] unit decrease	Illumina [~ 11800000] (imputed)	N
2017-11-30	29059683	Michailidou K	2017-10-23	Nature	www.ncbi.nlm.nih.gov/pubmed/29059683	Association analysis identifies 65 new breast cancer risk loci.	Breast cancer	76,192 European ancestry cases, 63,082 European ancestry controls	46,785 European ancestry cases, 42,892 European ancestry controls, 14,068 East Asian ancestry cases, 13,104 East Asian ancestry controls	6p22.3	6	20621007	y	CDKAL1	CDKAL1			54901			rs2223621-C	rs2223621	0	2223621	intron_variant	0	0.38	3e-10	9.52288	(EA)	1.04	[1.02-1.06] (Oncoarray)	Illumina [~ 11800000] (imputed)	N
2017-11-30	29059683	Michailidou K	2017-10-23	Nature	www.ncbi.nlm.nih.gov/pubmed/29059683	Association analysis identifies 65 new breast cancer risk loci.	Breast cancer	76,192 European ancestry cases, 63,082 European ancestry controls	46,785 European ancestry cases, 42,892 European ancestry controls, 14,068 East Asian ancestry cases, 13,104 East Asian ancestry controls	6p22.3	6	20728282	y	NR	CDKAL1			54901			rs6928012-T	rs6928012	0	6928012	intron_variant	0	0.5967	2e-06	5.69897	(EA)	0.0303	[0.018-0.043] unit decrease	Illumina [~ 11800000] (imputed)	N
2017-11-30	29059683	Michailidou K	2017-10-23	Nature	www.ncbi.nlm.nih.gov/pubmed/29059683	Association analysis identifies 65 new breast cancer risk loci.	Breast cancer	76,192 European ancestry cases, 63,082 European ancestry controls	46,785 European ancestry cases, 42,892 European ancestry controls, 14,068 East Asian ancestry cases, 13,104 East Asian ancestry controls	6p22.3	6	20923044	y	NR	CDKAL1			54901			rs9460578-A	rs9460578	0	9460578	intron_variant	0	0.2834	1e-06	6	(EA)	0.0337	[0.02-0.047] unit decrease	Illumina [~ 11800000] (imputed)	N
2017-11-30	29059683	Michailidou K	2017-10-23	Nature	www.ncbi.nlm.nih.gov/pubmed/29059683	Association analysis identifies 65 new breast cancer risk loci.	Breast cancer	76,192 European ancestry cases, 63,082 European ancestry controls	46,785 European ancestry cases, 42,892 European ancestry controls, 14,068 East Asian ancestry cases, 13,104 East Asian ancestry controls	6p21.2	6	36676721	y	NR	CDKN1A			1026			rs3829964-C	rs3829964	0	3829964	intron_variant	0	0.4864	9e-08	7.04576	(EA)	0.0331	[0.021-0.045] unit increase	Illumina [~ 11800000] (imputed)	N
2017-11-30	29059683	Michailidou K	2017-10-23	Nature	www.ncbi.nlm.nih.gov/pubmed/29059683	Association analysis identifies 65 new breast cancer risk loci.	Breast cancer	76,192 European ancestry cases, 63,082 European ancestry controls	46,785 European ancestry cases, 42,892 European ancestry controls, 14,068 East Asian ancestry cases, 13,104 East Asian ancestry controls	9p21.3	9	22062135	y	CDKN2A, CDKN2B	CDKN2B-AS1			100048912			rs1011970-T	rs1011970	0	1011970	intron_variant	0	0.16	1e-15	15	(EA)	1.07	[1.04-1.09] (Oncoarray)	Illumina [~ 11800000] (imputed)	N
2010-06-02	20453838	Turnbull C	2010-05-09	Nat Genet	www.ncbi.nlm.nih.gov/pubmed/20453838	Genome-wide association study identifies five new breast cancer susceptibility loci.	Breast cancer	3,659 European ancestry cases, 4,897 European ancestry controls	12,576 European ancestry cases, 12,223 European ancestry controls	9p21.3	9	22062135	y	CDKN2A, CDKN2B	CDKN2B-AS1			100048912			rs1011970-T	rs1011970	0	1011970	intron_variant	0	0.17	3e-08	7.52288		1.09	[1.04-1.14]	Illumina [582886]	N
2013-09-12	23535729	Michailidou K	2013-04-01	Nat Genet	www.ncbi.nlm.nih.gov/pubmed/23535729	Large-scale genotyping identifies 41 new loci associated with breast cancer risk.	Breast cancer	10,052 European ancestry cases, 12,575 European ancestry controls	45,290 European ancestry cases, 41,880 European ancestry controls	9p21.3	9	22062135	y	CDKN2A, CDKN2B	CDKN2B-AS1			100048912			rs1011970-T	rs1011970	0	1011970	intron_variant	0	0.17	6e-08	7.22185		1.06	[1.03-1.08]	Affymetrix, Illumina [~ 2600000] (imputed)	N
2018-12-14	30323354	Lee JY	2018-10-15	Sci Rep	www.ncbi.nlm.nih.gov/pubmed/30323354	BRCA1/2-negative, high-risk breast cancers (BRCAX) for Asian women: genetic susceptibility loci and their potential impacts.	BRCA1/2-negative high-risk breast cancer	1,469 Korean ancestry cases, 5,979 Korean ancestry controls	NA	9p21.3	9	21995942	y	CDKN2B-AS1	CDKN2B-AS1			100048912			rs78545330-A	rs78545330	0	78545330	non_coding_transcript_exon_variant	0	0.26	3e-06	5.52288		1.26	[1.14-1.39]	Affymetrix, Illumina [3378933] (imputed)	N
2017-11-30	29059683	Michailidou K	2017-10-23	Nature	www.ncbi.nlm.nih.gov/pubmed/29059683	Association analysis identifies 65 new breast cancer risk loci.	Breast cancer	76,192 European ancestry cases, 63,082 European ancestry controls	46,785 European ancestry cases, 42,892 European ancestry controls, 14,068 East Asian ancestry cases, 13,104 East Asian ancestry controls	9p21.3	9	22067594	y	NR	CDKN2B-AS1			100048912			rs10811650-G	rs10811650	0	10811650	intron_variant	0	0.4205	2e-13	12.699	(EA)	0.0461	[0.034-0.058] unit decrease	Illumina [~ 11800000] (imputed)	N
2017-11-14	25751625	Michailidou K	2015-04-01	Nat Genet	www.ncbi.nlm.nih.gov/pubmed/25751625	Genome-wide association analysis of more than 120,000 individuals identifies 15 new susceptibility loci for breast cancer.	Breast cancer	15,748 European ancestry cases, 18,084 European ancestry controls	46,785 European ancestry cases, 42,892 European ancestry controls	9p21.3	9	22062135	y	NR	CDKN2B-AS1			100048912			rs1011970-T	rs1011970	0	1011970	intron_variant	0	0.17	4e-09	8.39794		1.06	[1.03-1.08]	Affymetrix, Illumina [~ 11600000] (imputed)	N
2017-12-19	29058716	Milne RL	2017-10-23	Nat Genet	www.ncbi.nlm.nih.gov/pubmed/29058716	Identification of ten variants associated with risk of estrogen-receptor-negative breast cancer.	Breast cancer (estrogen-receptor negative)	14,135 European ancestry cases, 58,126 European ancestry controls	7,333 European ancestry cases, 42,468 European ancestry controls	9p21.3	9	22062135	y	NR	CDKN2B-AS1			100048912			rs1011970-T	rs1011970	0	1011970	intron_variant	0	0.16	5e-07	6.30103		1.05	[1.00-1.09] (Oncoarray)	Illumina [~ 11500000] (imputed)	N
2017-03-31	27117709	Couch FJ	2016-04-27	Nat Commun	www.ncbi.nlm.nih.gov/pubmed/27117709	Identification of four novel susceptibility loci for oestrogen receptor negative breast cancer.	Breast cancer (estrogen-receptor negative)	4,939 European ancestry cases, 14,352 European ancestry controls	7,333 European ancestry cases, 42,468 European ancestry controls	9p21.3	9	22062135	y	NR	CDKN2B-AS1			100048912			rs1011970-?	rs1011970	0	1011970	intron_variant	0	0.17	2e-06	5.69897		1.11	[1.06-1.15]	Illumina [10909381] (imputed)	N
2017-11-30	29059683	Michailidou K	2017-10-23	Nature	www.ncbi.nlm.nih.gov/pubmed/29059683	Association analysis identifies 65 new breast cancer risk loci.	Breast cancer	76,192 European ancestry cases, 63,082 European ancestry controls	46,785 European ancestry cases, 42,892 European ancestry controls, 14,068 East Asian ancestry cases, 13,104 East Asian ancestry controls	1p32.3	1	51001425	y	NR	CDKN2C - MIR4421	1031	100616189		26788	58412	rs56168262-C	rs56168262	0	56168262	intergenic_variant	1	0.4737	2e-08	7.69897	(EA)	0.0372	[0.024-0.05] unit increase	Illumina [~ 11800000] (imputed)	N
2017-11-30	29059683	Michailidou K	2017-10-23	Nature	www.ncbi.nlm.nih.gov/pubmed/29059683	Association analysis identifies 65 new breast cancer risk loci.	Breast cancer	76,192 European ancestry cases, 63,082 European ancestry controls	46,785 European ancestry cases, 42,892 European ancestry controls, 14,068 East Asian ancestry cases, 13,104 East Asian ancestry controls	16q23.2	16	80616908	y	CDYL2	CDYL2			124359			rs13329835-G	rs13329835	0	13329835	intron_variant	0	0.23	9e-27	26.0458	(EA)	1.07	[1.05-1.09] (Oncoarray)	Illumina [~ 11800000] (imputed)	N
2013-09-12	23535729	Michailidou K	2013-04-01	Nat Genet	www.ncbi.nlm.nih.gov/pubmed/23535729	Large-scale genotyping identifies 41 new loci associated with breast cancer risk.	Breast cancer	10,052 European ancestry cases, 12,575 European ancestry controls	45,290 European ancestry cases, 41,880 European ancestry controls	16q23.2	16	80616908	y	CDYL2	CDYL2			124359			rs13329835-G	rs13329835	0	13329835	intron_variant	0	0.22	2e-16	15.699		1.08	[1.05-1.10]	Affymetrix, Illumina [~ 2600000] (imputed)	N
2017-11-30	29059683	Michailidou K	2017-10-23	Nature	www.ncbi.nlm.nih.gov/pubmed/29059683	Association analysis identifies 65 new breast cancer risk loci.	Breast cancer	76,192 European ancestry cases, 63,082 European ancestry controls	46,785 European ancestry cases, 42,892 European ancestry controls, 14,068 East Asian ancestry cases, 13,104 East Asian ancestry controls	16q23.2	16	80614399	y	NR	CDYL2			124359			rs7500067-G	rs7500067	0	7500067	intron_variant	0	0.2293	4e-27	26.3979	(EA)	0.0785	[0.064-0.093] unit increase	Illumina [~ 11800000] (imputed)	N
2017-11-14	25751625	Michailidou K	2015-04-01	Nat Genet	www.ncbi.nlm.nih.gov/pubmed/25751625	Genome-wide association analysis of more than 120,000 individuals identifies 15 new susceptibility loci for breast cancer.	Breast cancer	15,748 European ancestry cases, 18,084 European ancestry controls	46,785 European ancestry cases, 42,892 European ancestry controls	16q23.2	16	80616908	y	NR	CDYL2			124359			rs13329835-G	rs13329835	0	13329835	intron_variant	0	0.22	2e-17	16.699		1.08	[1.06-1.11]	Affymetrix, Illumina [~ 11600000] (imputed)	N
2017-11-30	29059683	Michailidou K	2017-10-23	Nature	www.ncbi.nlm.nih.gov/pubmed/29059683	Association analysis identifies 65 new breast cancer risk loci.	Breast cancer	76,192 European ancestry cases, 63,082 European ancestry controls	46,785 European ancestry cases, 42,892 European ancestry controls, 14,068 East Asian ancestry cases, 13,104 East Asian ancestry controls	16q23.2	16	80805081	y	NR	CDYL2 - LOC100996425	124359	100996425		38	23654	rs72820985-G	rs72820985	0	72820985	intergenic_variant	1	0.1609	1e-06	6	(EA)	0.0423	[0.025-0.059] unit decrease	Illumina [~ 11800000] (imputed)	N
2017-11-30	29059683	Michailidou K	2017-10-23	Nature	www.ncbi.nlm.nih.gov/pubmed/29059683	Association analysis identifies 65 new breast cancer risk loci.	Breast cancer	76,192 European ancestry cases, 63,082 European ancestry controls	46,785 European ancestry cases, 42,892 European ancestry controls, 14,068 East Asian ancestry cases, 13,104 East Asian ancestry controls	18p11.21	18	13110432	y	NR	CEP192			55125			rs58685532-A	rs58685532	0	58685532	intron_variant	0	0.1721	4e-06	5.39794	(EA)	0.041	[0.024-0.058] unit decrease	Illumina [~ 11800000] (imputed)	N
2017-11-30	29059683	Michailidou K	2017-10-23	Nature	www.ncbi.nlm.nih.gov/pubmed/29059683	Association analysis identifies 65 new breast cancer risk loci.	Breast cancer	76,192 European ancestry cases, 63,082 European ancestry controls	46,785 European ancestry cases, 42,892 European ancestry controls, 14,068 East Asian ancestry cases, 13,104 East Asian ancestry controls	10q23.33	10	93532431	y	intergenic	CEP55 - LOC105378436	55165	105378436		3337	24048	rs140936696-C	rs140936696	0	140936696	intergenic_variant	1	0.18	4e-08	7.39794	(EA)	1.04	[1.02-1.07] (Oncoarray)	Illumina [~ 11800000] (imputed)	N
2017-11-30	29059683	Michailidou K	2017-10-23	Nature	www.ncbi.nlm.nih.gov/pubmed/29059683	Association analysis identifies 65 new breast cancer risk loci.	Breast cancer	76,192 European ancestry cases, 63,082 European ancestry controls	46,785 European ancestry cases, 42,892 European ancestry controls, 14,068 East Asian ancestry cases, 13,104 East Asian ancestry controls	2q33.1	2	201140114	y	NR	CFLAR			8837			rs182731523-C	rs182731523	0	182731523	intron_variant	0	0.1861	8e-08	7.09691	(EA)	0.0426	[0.027-0.058] unit increase	Illumina [~ 11800000] (imputed)	N
2017-11-30	29059683	Michailidou K	2017-10-23	Nature	www.ncbi.nlm.nih.gov/pubmed/29059683	Association analysis identifies 65 new breast cancer risk loci.	Breast cancer	76,192 European ancestry cases, 63,082 European ancestry controls	46,785 European ancestry cases, 42,892 European ancestry controls, 14,068 East Asian ancestry cases, 13,104 East Asian ancestry controls	10p14	10	8655165	y	NR	CHCHD3P1 - RNA5SP299	338591	100873574		34356	1551	rs74433033-A	rs74433033	0	74433033	intergenic_variant	1	0.0332	9e-07	6.04576	(EA)	0.09	[0.054-0.126] unit increase	Illumina [~ 11800000] (imputed)	N
2017-11-30	29059683	Michailidou K	2017-10-23	Nature	www.ncbi.nlm.nih.gov/pubmed/29059683	Association analysis identifies 65 new breast cancer risk loci.	Breast cancer	76,192 European ancestry cases, 63,082 European ancestry controls	46,785 European ancestry cases, 42,892 European ancestry controls, 14,068 East Asian ancestry cases, 13,104 East Asian ancestry controls	22q12.1	22	28725099	y	CHEK2	CHEK2			11200			rs17879961-G	rs17879961	0	17879961	missense_variant	0	0.005	1e-08	8	(EA)	1.26	[1.11-1.42] (Oncoarray)	Illumina [~ 11800000] (imputed)	N
2017-11-30	29059683	Michailidou K	2017-10-23	Nature	www.ncbi.nlm.nih.gov/pubmed/29059683	Association analysis identifies 65 new breast cancer risk loci.	Breast cancer	76,192 European ancestry cases, 63,082 European ancestry controls	46,785 European ancestry cases, 42,892 European ancestry controls, 14,068 East Asian ancestry cases, 13,104 East Asian ancestry controls	18q11.2	18	26990703	y	CHST9	CHST9			83539			rs1436904-T	rs1436904	0	1436904	intron_variant	0	0.6	1e-14	14	(EA)	1.05263	[1.03-1.06] (Oncoarray)	Illumina [~ 11800000] (imputed)	N
2013-09-12	23535729	Michailidou K	2013-04-01	Nat Genet	www.ncbi.nlm.nih.gov/pubmed/23535729	Large-scale genotyping identifies 41 new loci associated with breast cancer risk.	Breast cancer	10,052 European ancestry cases, 12,575 European ancestry controls	45,290 European ancestry cases, 41,880 European ancestry controls	18q11.2	18	26990703	y	CHST9	CHST9			83539			rs1436904-T	rs1436904	0	1436904	intron_variant	0	0.6	3e-08	7.52288		1.04	[1.02-1.06]	Affymetrix, Illumina [~ 2600000] (imputed)	N
2017-11-30	29059683	Michailidou K	2017-10-23	Nature	www.ncbi.nlm.nih.gov/pubmed/29059683	Association analysis identifies 65 new breast cancer risk loci.	Breast cancer	76,192 European ancestry cases, 63,082 European ancestry controls	46,785 European ancestry cases, 42,892 European ancestry controls, 14,068 East Asian ancestry cases, 13,104 East Asian ancestry controls	18q11.2	18	27025475	y	NR	CHST9			83539			rs12458099-A	rs12458099	0	12458099	intron_variant	0	0.4378	1e-12	12	(EA)	0.0443	[0.032-0.056] unit decrease	Illumina [~ 11800000] (imputed)	N
2017-11-14	25751625	Michailidou K	2015-04-01	Nat Genet	www.ncbi.nlm.nih.gov/pubmed/25751625	Genome-wide association analysis of more than 120,000 individuals identifies 15 new susceptibility loci for breast cancer.	Breast cancer	15,748 European ancestry cases, 18,084 European ancestry controls	46,785 European ancestry cases, 42,892 European ancestry controls	18q11.2	18	26990703	y	NR	CHST9			83539			rs1436904-T	rs1436904	0	1436904	intron_variant	0	0.6	3e-08	7.52288		1.04167	[1.03-1.06]	Affymetrix, Illumina [~ 11600000] (imputed)	N
2017-11-30	29059683	Michailidou K	2017-10-23	Nature	www.ncbi.nlm.nih.gov/pubmed/29059683	Association analysis identifies 65 new breast cancer risk loci.	Breast cancer	76,192 European ancestry cases, 63,082 European ancestry controls	46,785 European ancestry cases, 42,892 European ancestry controls, 14,068 East Asian ancestry cases, 13,104 East Asian ancestry controls	1p34.2	1	40914768	y	intergenic	CITED4 - LOC100128362	163732	100128362		52422	23334	rs4233486-C	rs4233486	0	4233486	intergenic_variant	1	0.64	9e-09	8.04576	(EA)	1.03093	[1.02-1.05] (Oncoarray)	Illumina [~ 11800000] (imputed)	N
2017-11-30	29059683	Michailidou K	2017-10-23	Nature	www.ncbi.nlm.nih.gov/pubmed/29059683	Association analysis identifies 65 new breast cancer risk loci.	Breast cancer	76,192 European ancestry cases, 63,082 European ancestry controls	46,785 European ancestry cases, 42,892 European ancestry controls, 14,068 East Asian ancestry cases, 13,104 East Asian ancestry controls	11q24.1	11	123095918	y	NR	CLMP			79827			rs7121616-G	rs7121616	0	7121616	intron_variant	0	0.2854	7e-06	5.1549	(EA)	0.0314	[0.018-0.045] unit decrease	Illumina [~ 11800000] (imputed)	N
2017-11-30	29059683	Michailidou K	2017-10-23	Nature	www.ncbi.nlm.nih.gov/pubmed/29059683	Association analysis identifies 65 new breast cancer risk loci.	Breast cancer	76,192 European ancestry cases, 63,082 European ancestry controls	46,785 European ancestry cases, 42,892 European ancestry controls, 14,068 East Asian ancestry cases, 13,104 East Asian ancestry controls	3p24.1	3	28290744	y	NR	CMC1			152100			rs73822569-G	rs73822569	0	73822569	intron_variant	0	0.0054	1e-06	6	(EA)	0.2565	[0.15-0.36] unit increase	Illumina [~ 11800000] (imputed)	N
2017-11-30	29059683	Michailidou K	2017-10-23	Nature	www.ncbi.nlm.nih.gov/pubmed/29059683	Association analysis identifies 65 new breast cancer risk loci.	Breast cancer	76,192 European ancestry cases, 63,082 European ancestry controls	46,785 European ancestry cases, 42,892 European ancestry controls, 14,068 East Asian ancestry cases, 13,104 East Asian ancestry controls	3q12.1	3	100004736	y	CMSS1, FILIP1L	CMSS1, FILIP1L			84319, 11259			rs9833888-G	rs9833888	0	9833888	intron_variant	0	0.22	5e-10	9.30103	(EA)	1.06	[1.04-1.08] (Oncoarray)	Illumina [~ 11800000] (imputed)	N
2017-11-30	29059683	Michailidou K	2017-10-23	Nature	www.ncbi.nlm.nih.gov/pubmed/29059683	Association analysis identifies 65 new breast cancer risk loci.	Breast cancer	76,192 European ancestry cases, 63,082 European ancestry controls	46,785 European ancestry cases, 42,892 European ancestry controls, 14,068 East Asian ancestry cases, 13,104 East Asian ancestry controls	3q12.1	3	100105841	y	NR	CMSS1, FILIP1L			84319, 11259			rs9837602-A	rs9837602	0	9837602	intron_variant	0	0.2261	1e-09	9	(EA)	0.0448	[0.03-0.059] unit increase	Illumina [~ 11800000] (imputed)	N
2017-11-30	29059683	Michailidou K	2017-10-23	Nature	www.ncbi.nlm.nih.gov/pubmed/29059683	Association analysis identifies 65 new breast cancer risk loci.	Breast cancer	76,192 European ancestry cases, 63,082 European ancestry controls	46,785 European ancestry cases, 42,892 European ancestry controls, 14,068 East Asian ancestry cases, 13,104 East Asian ancestry controls	17q21.31	17	42807276	y	NR	CNTD1			124817			rs151329939-A	rs151329939	0	151329939	intron_variant	0	0.01	5e-09	8.30103	(EA)	0.1879	[0.12-0.25] unit increase	Illumina [~ 11800000] (imputed)	N
2017-11-30	29059683	Michailidou K	2017-10-23	Nature	www.ncbi.nlm.nih.gov/pubmed/29059683	Association analysis identifies 65 new breast cancer risk loci.	Breast cancer	76,192 European ancestry cases, 63,082 European ancestry controls	46,785 European ancestry cases, 42,892 European ancestry controls, 14,068 East Asian ancestry cases, 13,104 East Asian ancestry controls	17q21.2	17	42684371	y	CNTNAP1	CNTNAP1			8506			rs72826962-C	rs72826962	0	72826962	intron_variant	0	0.01	5e-09	8.30103	(EA)	1.2	[1.11-1.3] (Oncoarray)	Illumina [~ 11800000] (imputed)	N
2017-11-30	29059683	Michailidou K	2017-10-23	Nature	www.ncbi.nlm.nih.gov/pubmed/29059683	Association analysis identifies 65 new breast cancer risk loci.	Breast cancer	76,192 European ancestry cases, 63,082 European ancestry controls	46,785 European ancestry cases, 42,892 European ancestry controls, 14,068 East Asian ancestry cases, 13,104 East Asian ancestry controls	2q32.2	2	189205442	y	NR	COL5A2			1290			rs73034872-C	rs73034872	0	73034872	intergenic_variant	0	0.0148	8e-06	5.09691	(EA)	0.1191	[0.067-0.172] unit decrease	Illumina [~ 11800000] (imputed)	N
2017-11-30	29059683	Michailidou K	2017-10-23	Nature	www.ncbi.nlm.nih.gov/pubmed/29059683	Association analysis identifies 65 new breast cancer risk loci.	Breast cancer	76,192 European ancestry cases, 63,082 European ancestry controls	46,785 European ancestry cases, 42,892 European ancestry controls, 14,068 East Asian ancestry cases, 13,104 East Asian ancestry controls	3q12.1	3	99682866	y	NR	COL8A1			1295			rs11298677-T	rs11298677	0	11298677	intron_variant	0	0.6142	5e-09	8.30103	(EA)	0.0373	[0.025-0.05] unit decrease	Illumina [~ 11800000] (imputed)	N
2017-11-30	29059683	Michailidou K	2017-10-23	Nature	www.ncbi.nlm.nih.gov/pubmed/29059683	Association analysis identifies 65 new breast cancer risk loci.	Breast cancer	76,192 European ancestry cases, 63,082 European ancestry controls	46,785 European ancestry cases, 42,892 European ancestry controls, 14,068 East Asian ancestry cases, 13,104 East Asian ancestry controls	10q23.32	10	92172529	y	NR	CPEB3			22849			rs72807246-G	rs72807246	0	72807246	intron_variant	0	0.139	3e-06	5.52288	(EA)	0.0429	[0.025-0.061] unit decrease	Illumina [~ 11800000] (imputed)	N
2017-11-30	29059683	Michailidou K	2017-10-23	Nature	www.ncbi.nlm.nih.gov/pubmed/29059683	Association analysis identifies 65 new breast cancer risk loci.	Breast cancer	76,192 European ancestry cases, 63,082 European ancestry controls	46,785 European ancestry cases, 42,892 European ancestry controls, 14,068 East Asian ancestry cases, 13,104 East Asian ancestry controls	6p21.2	6	36795636	y	NR	CPNE5			57699			rs72856431-T	rs72856431	0	72856431	intron_variant	0	0.0219	9e-07	6.04576	(EA)	0.1135	[0.068-0.159] unit increase	Illumina [~ 11800000] (imputed)	N
2017-11-30	29059683	Michailidou K	2017-10-23	Nature	www.ncbi.nlm.nih.gov/pubmed/29059683	Association analysis identifies 65 new breast cancer risk loci.	Breast cancer	76,192 European ancestry cases, 63,082 European ancestry controls	46,785 European ancestry cases, 42,892 European ancestry controls, 14,068 East Asian ancestry cases, 13,104 East Asian ancestry controls	7p15.1	7	28317270	y	CREB5	CREB5			9586			rs17156577-T	rs17156577	0	17156577	intron_variant	0	0.11	4e-09	8.39794	(EA)	1.05	[1.02-1.08] (Oncoarray)	Illumina [~ 11800000] (imputed)	N
2017-11-30	29059683	Michailidou K	2017-10-23	Nature	www.ncbi.nlm.nih.gov/pubmed/29059683	Association analysis identifies 65 new breast cancer risk loci.	Breast cancer	76,192 European ancestry cases, 63,082 European ancestry controls	46,785 European ancestry cases, 42,892 European ancestry controls, 14,068 East Asian ancestry cases, 13,104 East Asian ancestry controls	7p14.3	7	28828469	y	NR	CREB5 - TRIL	9586	9865		2575	124889	rs77702473-G	rs77702473	0	77702473	intergenic_variant	1	0.1066	2e-06	5.69897	(EA)	0.0481	[0.028-0.068] unit decrease	Illumina [~ 11800000] (imputed)	N
2017-11-30	29059683	Michailidou K	2017-10-23	Nature	www.ncbi.nlm.nih.gov/pubmed/29059683	Association analysis identifies 65 new breast cancer risk loci.	Breast cancer	76,192 European ancestry cases, 63,082 European ancestry controls	46,785 European ancestry cases, 42,892 European ancestry controls, 14,068 East Asian ancestry cases, 13,104 East Asian ancestry controls	16p13.3	16	3942751	y	NR	CREBBP - LOC102724927	1387	102724927		62024	4858	rs12920416-T	rs12920416	0	12920416	intron_variant	1	0.2475	8e-07	6.09691	(EA)	0.0412	[0.025-0.057] unit decrease	Illumina [~ 11800000] (imputed)	N
2015-10-26	25824743	Haryono SJ	2015-01-01	Asian Pac J Cancer Prev	www.ncbi.nlm.nih.gov/pubmed/25824743	A pilot genome-wide association study of breast cancer susceptibility loci in Indonesia.	Breast cancer	89 Indonesian ancestry cases, 46 Indonesian ancestry controls	NA	2p12	2	79716982	y	CTNNA2	CTNNA2			1496			rs13025833-A	rs13025833	0	13025833	intron_variant	0	0.52	1e-07	7		1.2	[1.13-1.33]	Affymetrix [292887]	N
2017-11-30	29059683	Michailidou K	2017-10-23	Nature	www.ncbi.nlm.nih.gov/pubmed/29059683	Association analysis identifies 65 new breast cancer risk loci.	Breast cancer	76,192 European ancestry cases, 63,082 European ancestry controls	46,785 European ancestry cases, 42,892 European ancestry controls, 14,068 East Asian ancestry cases, 13,104 East Asian ancestry controls	10q21.3	10	67248381	y	NR	CTNNA3			29119			rs141448180-C	rs141448180	0	141448180	intron_variant	0	0.0073	6e-06	5.22185	(EA)	0.2059	[0.12-0.29] unit decrease	Illumina [~ 11800000] (imputed)	N
2017-11-30	29059683	Michailidou K	2017-10-23	Nature	www.ncbi.nlm.nih.gov/pubmed/29059683	Association analysis identifies 65 new breast cancer risk loci.	Breast cancer	76,192 European ancestry cases, 63,082 European ancestry controls	46,785 European ancestry cases, 42,892 European ancestry controls, 14,068 East Asian ancestry cases, 13,104 East Asian ancestry controls	10q21.3	10	67640136	y	NR	CTNNA3			29119			rs186036693-G	rs186036693	0	186036693	intron_variant	0	0.007	2e-06	5.69897	(EA)	0.216	[0.13-0.31] unit decrease	Illumina [~ 11800000] (imputed)	N
2017-11-30	29059683	Michailidou K	2017-10-23	Nature	www.ncbi.nlm.nih.gov/pubmed/29059683	Association analysis identifies 65 new breast cancer risk loci.	Breast cancer	76,192 European ancestry cases, 63,082 European ancestry controls	46,785 European ancestry cases, 42,892 European ancestry controls, 14,068 East Asian ancestry cases, 13,104 East Asian ancestry controls	11q13.2	11	66569918	y	NR	CTSF - CCDC87	8722	55231		1342	20251	rs11344495-C	rs11344495	0	11344495	intergenic_variant	1	0.334	2e-06	5.69897	(EA)	0.0327	[0.019-0.046] unit increase	Illumina [~ 11800000] (imputed)	N
2017-11-30	29059683	Michailidou K	2017-10-23	Nature	www.ncbi.nlm.nih.gov/pubmed/29059683	Association analysis identifies 65 new breast cancer risk loci.	Breast cancer	76,192 European ancestry cases, 63,082 European ancestry controls	46,785 European ancestry cases, 42,892 European ancestry controls, 14,068 East Asian ancestry cases, 13,104 East Asian ancestry controls	7q22.1	7	101909160	y	CUX1	CUX1			1523			rs71559437-A	rs71559437	0	71559437	intron_variant	0	0.88	5e-12	11.301	(EA)	1.07527	[1.04-1.1] (Oncoarray)	Illumina [~ 11800000] (imputed)	N
2017-11-30	29059683	Michailidou K	2017-10-23	Nature	www.ncbi.nlm.nih.gov/pubmed/29059683	Association analysis identifies 65 new breast cancer risk loci.	Breast cancer	76,192 European ancestry cases, 63,082 European ancestry controls	46,785 European ancestry cases, 42,892 European ancestry controls, 14,068 East Asian ancestry cases, 13,104 East Asian ancestry controls	7q22.1	7	102160260	y	NR	CUX1			1523			rs411624-C	rs411624	0	411624	intron_variant	0	0.9557	2e-06	5.69897	(EA)	0.0767	[0.045-0.108] unit increase	Illumina [~ 11800000] (imputed)	N
2017-11-30	29059683	Michailidou K	2017-10-23	Nature	www.ncbi.nlm.nih.gov/pubmed/29059683	Association analysis identifies 65 new breast cancer risk loci.	Breast cancer	76,192 European ancestry cases, 63,082 European ancestry controls	46,785 European ancestry cases, 42,892 European ancestry controls, 14,068 East Asian ancestry cases, 13,104 East Asian ancestry controls	7q21.2	7	92143417	y	NR	CYP51A1-AS1			613126			rs35417517-C	rs35417517	0	35417517	intron_variant	0	0.392	8e-11	10.0969	(EA)	0.0416	[0.029-0.054] unit increase	Illumina [~ 11800000] (imputed)	N
2017-11-30	29059683	Michailidou K	2017-10-23	Nature	www.ncbi.nlm.nih.gov/pubmed/29059683	Association analysis identifies 65 new breast cancer risk loci.	Breast cancer	76,192 European ancestry cases, 63,082 European ancestry controls	46,785 European ancestry cases, 42,892 European ancestry controls, 14,068 East Asian ancestry cases, 13,104 East Asian ancestry controls	1q22	1	155697170	y	NR	DAP3			7818			rs348196-C	rs348196	0	348196	intron_variant	0	0.2375	2e-08	7.69897	(EA)	0.0407	[0.027-0.055] unit increase	Illumina [~ 11800000] (imputed)	N
2017-11-30	29059683	Michailidou K	2017-10-23	Nature	www.ncbi.nlm.nih.gov/pubmed/29059683	Association analysis identifies 65 new breast cancer risk loci.	Breast cancer	76,192 European ancestry cases, 63,082 European ancestry controls	46,785 European ancestry cases, 42,892 European ancestry controls, 14,068 East Asian ancestry cases, 13,104 East Asian ancestry controls	2q31.1	2	171513371	y	NR	DAP3P2 - RPS15P4	359774	401019		21440	3867	rs11680449-A	rs11680449	0	11680449	intergenic_variant	1	0.2823	4e-09	8.39794	(EA)	0.0404	[0.027-0.054] unit decrease	Illumina [~ 11800000] (imputed)	N
2013-09-12	23535729	Michailidou K	2013-04-01	Nat Genet	www.ncbi.nlm.nih.gov/pubmed/23535729	Large-scale genotyping identifies 41 new loci associated with breast cancer risk.	Breast cancer	10,052 European ancestry cases, 12,575 European ancestry controls	45,290 European ancestry cases, 41,880 European ancestry controls	1p13.2	1	113905767	y	BCL2L15, AP4B1, DCLRE1B, HIPK1, PTPN22	DCLRE1B			64858			rs11552449-T	rs11552449	0	11552449	missense_variant	0	0.17	2e-08	7.69897		1.07	[1.04-1.09]	Affymetrix, Illumina [~ 2600000] (imputed)	N
2017-11-30	29059683	Michailidou K	2017-10-23	Nature	www.ncbi.nlm.nih.gov/pubmed/29059683	Association analysis identifies 65 new breast cancer risk loci.	Breast cancer	76,192 European ancestry cases, 63,082 European ancestry controls	46,785 European ancestry cases, 42,892 European ancestry controls, 14,068 East Asian ancestry cases, 13,104 East Asian ancestry controls	1p13.2	1	113905767	y	DCLRE1B	DCLRE1B			64858			rs11552449-T	rs11552449	0	11552449	missense_variant	0	0.17	5e-11	10.301	(EA)	1.04	[1.01-1.06] (Oncoarray)	Illumina [~ 11800000] (imputed)	N
2017-11-14	25751625	Michailidou K	2015-04-01	Nat Genet	www.ncbi.nlm.nih.gov/pubmed/25751625	Genome-wide association analysis of more than 120,000 individuals identifies 15 new susceptibility loci for breast cancer.	Breast cancer	15,748 European ancestry cases, 18,084 European ancestry controls	46,785 European ancestry cases, 42,892 European ancestry controls	1p13.2	1	113905767	y	NR	DCLRE1B			64858			rs11552449-T	rs11552449	0	11552449	missense_variant	0	0.16	3e-09	8.52288		1.07	[1.04-1.09]	Affymetrix, Illumina [~ 11600000] (imputed)	N
2017-11-30	29059683	Michailidou K	2017-10-23	Nature	www.ncbi.nlm.nih.gov/pubmed/29059683	Association analysis identifies 65 new breast cancer risk loci.	Breast cancer	76,192 European ancestry cases, 63,082 European ancestry controls	46,785 European ancestry cases, 42,892 European ancestry controls, 14,068 East Asian ancestry cases, 13,104 East Asian ancestry controls	9p21.1	9	32455676	y	NR	DDX58			23586			rs1133071-G	rs1133071	0	1133071	intergenic_variant	0	0.3001	3e-06	5.52288	(EA)	0.0335	[0.02-0.047] unit decrease	Illumina [~ 11800000] (imputed)	N
2017-11-30	29059683	Michailidou K	2017-10-23	Nature	www.ncbi.nlm.nih.gov/pubmed/29059683	Association analysis identifies 65 new breast cancer risk loci.	Breast cancer	76,192 European ancestry cases, 63,082 European ancestry controls	46,785 European ancestry cases, 42,892 European ancestry controls, 14,068 East Asian ancestry cases, 13,104 East Asian ancestry controls	2q35	2	217431785	y	DIRC3	DIRC3			729582			rs16857609-T	rs16857609	0	16857609	intron_variant	0	0.26	2e-25	24.699	(EA)	1.06	[1.04-1.09] (Oncoarray)	Illumina [~ 11800000] (imputed)	N
2013-09-12	23535729	Michailidou K	2013-04-01	Nat Genet	www.ncbi.nlm.nih.gov/pubmed/23535729	Large-scale genotyping identifies 41 new loci associated with breast cancer risk.	Breast cancer	10,052 European ancestry cases, 12,575 European ancestry controls	45,290 European ancestry cases, 41,880 European ancestry controls	2q35	2	217431785	y	DIRC3	DIRC3			729582			rs16857609-T	rs16857609	0	16857609	intron_variant	0	0.26	1e-15	15		1.08	[1.06-1.10]	Affymetrix, Illumina [~ 2600000] (imputed)	N
2017-11-30	29059683	Michailidou K	2017-10-23	Nature	www.ncbi.nlm.nih.gov/pubmed/29059683	Association analysis identifies 65 new breast cancer risk loci.	Breast cancer	76,192 European ancestry cases, 63,082 European ancestry controls	46,785 European ancestry cases, 42,892 European ancestry controls, 14,068 East Asian ancestry cases, 13,104 East Asian ancestry controls	2q35	2	217427435	y	NR	DIRC3			729582			rs11693806-G	rs11693806	0	11693806	non_coding_transcript_exon_variant	0	0.7288	3e-26	25.5229	(EA)	0.0739	[0.06-0.088] unit decrease	Illumina [~ 11800000] (imputed)	N
2017-03-31	27117709	Couch FJ	2016-04-27	Nat Commun	www.ncbi.nlm.nih.gov/pubmed/27117709	Identification of four novel susceptibility loci for oestrogen receptor negative breast cancer.	Breast cancer	4,939 European ancestry estrogen receptor-negative cases, 14,352 European ancestry controls	7,333 European ancestry estrogen receptor-negative cases, 7,797 European ancestry BRCA1 mutation carrier cases, 7,455 European ancestry BRCA1 mutation carrier controls, 42,468 European ancestry controls	2q35	2	217431785	y	NR	DIRC3			729582			rs16857609-?	rs16857609	0	16857609	intron_variant	0	0.26	7e-06	5.1549		1.04	[1.00-1.09] (BRCA1 carriers)	Illumina [10909381] (imputed)	N
2017-11-14	25751625	Michailidou K	2015-04-01	Nat Genet	www.ncbi.nlm.nih.gov/pubmed/25751625	Genome-wide association analysis of more than 120,000 individuals identifies 15 new susceptibility loci for breast cancer.	Breast cancer	15,748 European ancestry cases, 18,084 European ancestry controls	46,785 European ancestry cases, 42,892 European ancestry controls	2q35	2	217431785	y	NR	DIRC3			729582			rs16857609-T	rs16857609	0	16857609	intron_variant	0	0.26	1e-17	17		1.08	[1.06-1.11]	Affymetrix, Illumina [~ 11600000] (imputed)	N
2017-12-19	29058716	Milne RL	2017-10-23	Nat Genet	www.ncbi.nlm.nih.gov/pubmed/29058716	Identification of ten variants associated with risk of estrogen-receptor-negative breast cancer.	Breast cancer (estrogen-receptor negative)	14,135 European ancestry cases, 58,126 European ancestry controls	7,333 European ancestry cases, 42,468 European ancestry controls	2q35	2	217431785	y	NR	DIRC3			729582			rs16857609-T	rs16857609	0	16857609	intron_variant	0	0.26	2e-08	7.69897		1.07	[1.03-1.10] (Oncoarray)	Illumina [~ 11500000] (imputed)	N
2017-11-30	29059683	Michailidou K	2017-10-23	Nature	www.ncbi.nlm.nih.gov/pubmed/29059683	Association analysis identifies 65 new breast cancer risk loci.	Breast cancer	76,192 European ancestry cases, 63,082 European ancestry controls	46,785 European ancestry cases, 42,892 European ancestry controls, 14,068 East Asian ancestry cases, 13,104 East Asian ancestry controls	13q14.3	13	50521772	y	NR	DLEU1-AS1, DLEU1			103689915, 10301			rs9562987-A	rs9562987	0	9562987	intron_variant	0	0.3219	4e-06	5.39794	(EA)	0.0305	[0.018-0.043] unit decrease	Illumina [~ 11800000] (imputed)	N
2017-11-30	29059683	Michailidou K	2017-10-23	Nature	www.ncbi.nlm.nih.gov/pubmed/29059683	Association analysis identifies 65 new breast cancer risk loci.	Breast cancer	76,192 European ancestry cases, 63,082 European ancestry controls	46,785 European ancestry cases, 42,892 European ancestry controls, 14,068 East Asian ancestry cases, 13,104 East Asian ancestry controls	2q31.1	2	172108243	y	DLX2-AS1	DLX2-AS1			104326193			rs2016394-G	rs2016394	0	2016394	intron_variant	0	0.53	6e-12	11.2218	(EA)	1.05263	[1.03-1.06] (Oncoarray)	Illumina [~ 11800000] (imputed)	N
2013-09-12	23535729	Michailidou K	2013-04-01	Nat Genet	www.ncbi.nlm.nih.gov/pubmed/23535729	Large-scale genotyping identifies 41 new loci associated with breast cancer risk.	Breast cancer	10,052 European ancestry cases, 12,575 European ancestry controls	45,290 European ancestry cases, 41,880 European ancestry controls	2q31.1	2	172108243	y	METAP1D, DLX1, DLX2	DLX2-AS1			104326193			rs2016394-G	rs2016394	0	2016394	intron_variant	0	0.52	1e-08	8		1.05	[1.03-1.08]	Affymetrix, Illumina [~ 2600000] (imputed)	N
2017-11-14	25751625	Michailidou K	2015-04-01	Nat Genet	www.ncbi.nlm.nih.gov/pubmed/25751625	Genome-wide association analysis of more than 120,000 individuals identifies 15 new susceptibility loci for breast cancer.	Breast cancer	15,748 European ancestry cases, 18,084 European ancestry controls	46,785 European ancestry cases, 42,892 European ancestry controls	2q31.1	2	172108243	y	NR	DLX2-AS1			104326193			rs2016394-G	rs2016394	0	2016394	intron_variant	0	0.52	8e-06	5.09691		1.05263	[1.03-1.06]	Affymetrix, Illumina [~ 11600000] (imputed)	N
2017-11-30	29059683	Michailidou K	2017-10-23	Nature	www.ncbi.nlm.nih.gov/pubmed/29059683	Association analysis identifies 65 new breast cancer risk loci.	Breast cancer	76,192 European ancestry cases, 63,082 European ancestry controls	46,785 European ancestry cases, 42,892 European ancestry controls, 14,068 East Asian ancestry cases, 13,104 East Asian ancestry controls	Xp21.1	X	32016153	y	NR	DMD			1756			rs1293906-T	rs1293906	0	1293906	intron_variant	0	0.1708	9e-06	5.04576	(EA)	0.0408	[0.023-0.059] unit decrease	Illumina [~ 11800000] (imputed)	N
2017-11-30	29059683	Michailidou K	2017-10-23	Nature	www.ncbi.nlm.nih.gov/pubmed/29059683	Association analysis identifies 65 new breast cancer risk loci.	Breast cancer	76,192 European ancestry cases, 63,082 European ancestry controls	46,785 European ancestry cases, 42,892 European ancestry controls, 14,068 East Asian ancestry cases, 13,104 East Asian ancestry controls	Xp21.1	X	32564969	y	NR	DMD			1756			rs145455135-A	rs145455135	0	145455135	intron_variant	0	0.0208	9e-06	5.04576	(EA)	0.1571	[0.088-0.227] unit decrease	Illumina [~ 11800000] (imputed)	N
2017-11-30	29059683	Michailidou K	2017-10-23	Nature	www.ncbi.nlm.nih.gov/pubmed/29059683	Association analysis identifies 65 new breast cancer risk loci.	Breast cancer	76,192 European ancestry cases, 63,082 European ancestry controls	46,785 European ancestry cases, 42,892 European ancestry controls, 14,068 East Asian ancestry cases, 13,104 East Asian ancestry controls	10p12.31	10	21863269	y	NR	DNAJC1			64215			rs72806318-A	rs72806318	0	72806318	intron_variant	0	0.0153	5e-19	18.301	(EA)	0.2218	[0.17-0.27] unit increase	Illumina [~ 11800000] (imputed)	N
2017-11-30	29059683	Michailidou K	2017-10-23	Nature	www.ncbi.nlm.nih.gov/pubmed/29059683	Association analysis identifies 65 new breast cancer risk loci.	Breast cancer	76,192 European ancestry cases, 63,082 European ancestry controls	46,785 European ancestry cases, 42,892 European ancestry controls, 14,068 East Asian ancestry cases, 13,104 East Asian ancestry controls	10p12.31	10	22026914	y	DNAJC1	DNAJC1 - ADIPOR1P1	64215	645220		23146	137662	rs11814448-C	rs11814448	0	11814448	intergenic_variant	1	0.02	6e-18	17.2218	(EA)	1.12	[1.06-1.19] (Oncoarray)	Illumina [~ 11800000] (imputed)	N
2013-09-12	23535729	Michailidou K	2013-04-01	Nat Genet	www.ncbi.nlm.nih.gov/pubmed/23535729	Large-scale genotyping identifies 41 new loci associated with breast cancer risk.	Breast cancer	10,052 European ancestry cases, 12,575 European ancestry controls	45,290 European ancestry cases, 41,880 European ancestry controls	10p12.31	10	22026914	y	DNAJC1	DNAJC1 - ADIPOR1P1	64215	645220		23146	137662	rs11814448-C	rs11814448	0	11814448	intergenic_variant	1	0.02	9e-16	15.0458		1.26	[1.18-1.35]	Affymetrix, Illumina [~ 2600000] (imputed)	N
2017-11-30	29059683	Michailidou K	2017-10-23	Nature	www.ncbi.nlm.nih.gov/pubmed/29059683	Association analysis identifies 65 new breast cancer risk loci.	Breast cancer	76,192 European ancestry cases, 63,082 European ancestry controls	46,785 European ancestry cases, 42,892 European ancestry controls, 14,068 East Asian ancestry cases, 13,104 East Asian ancestry controls	10p12.31	10	22108073	y	NR	DNAJC1 - ADIPOR1P1	64215	645220		104305	56503	rs72810771-T	rs72810771	0	72810771	intergenic_variant	1	0.0187	2e-19	18.699	(EA)	0.2026	[0.16-0.25] unit increase	Illumina [~ 11800000] (imputed)	N
2017-11-14	25751625	Michailidou K	2015-04-01	Nat Genet	www.ncbi.nlm.nih.gov/pubmed/25751625	Genome-wide association analysis of more than 120,000 individuals identifies 15 new susceptibility loci for breast cancer.	Breast cancer	15,748 European ancestry cases, 18,084 European ancestry controls	46,785 European ancestry cases, 42,892 European ancestry controls	10p12.31	10	22026914	y	NR	DNAJC1 - ADIPOR1P1	64215	645220		23146	137662	rs11814448-C	rs11814448	0	11814448	intergenic_variant	1	0.02	6e-17	16.2218		1.27	[1.19-1.36]	Affymetrix, Illumina [~ 11600000] (imputed)	N
2017-11-30	29059683	Michailidou K	2017-10-23	Nature	www.ncbi.nlm.nih.gov/pubmed/29059683	Association analysis identifies 65 new breast cancer risk loci.	Breast cancer	76,192 European ancestry cases, 63,082 European ancestry controls	46,785 European ancestry cases, 42,892 European ancestry controls, 14,068 East Asian ancestry cases, 13,104 East Asian ancestry controls	22q13.1	22	38798063	y	NR	DNAL4 - NPTXR	10126	23467		3907	20388	rs9619765-T	rs9619765	0	9619765	intergenic_variant	1	0.0324	1e-06	6	(EA)	0.0914	[0.054-0.128] unit decrease	Illumina [~ 11800000] (imputed)	N
2017-11-30	29059683	Michailidou K	2017-10-23	Nature	www.ncbi.nlm.nih.gov/pubmed/29059683	Association analysis identifies 65 new breast cancer risk loci.	Breast cancer	76,192 European ancestry cases, 63,082 European ancestry controls	46,785 European ancestry cases, 42,892 European ancestry controls, 14,068 East Asian ancestry cases, 13,104 East Asian ancestry controls	1q24.3	1	172361919	y	NR	DNM3			26052			rs1894633-G	rs1894633	0	1894633	intron_variant	0	0.3337	2e-06	5.69897	(EA)	0.0312	[0.018-0.044] unit decrease	Illumina [~ 11800000] (imputed)	N
2017-11-30	29059683	Michailidou K	2017-10-23	Nature	www.ncbi.nlm.nih.gov/pubmed/29059683	Association analysis identifies 65 new breast cancer risk loci.	Breast cancer	76,192 European ancestry cases, 63,082 European ancestry controls	46,785 European ancestry cases, 42,892 European ancestry controls, 14,068 East Asian ancestry cases, 13,104 East Asian ancestry controls	19p13.3	19	2226677	y	NR	DOT1L			84444			rs3815308-A	rs3815308	0	3815308	missense_variant	0	0.4348	7e-06	5.1549	(EA)	0.0288	[0.016-0.041] unit increase	Illumina [~ 11800000] (imputed)	N
2017-11-30	29059683	Michailidou K	2017-10-23	Nature	www.ncbi.nlm.nih.gov/pubmed/29059683	Association analysis identifies 65 new breast cancer risk loci.	Breast cancer	76,192 European ancestry cases, 63,082 European ancestry controls	46,785 European ancestry cases, 42,892 European ancestry controls, 14,068 East Asian ancestry cases, 13,104 East Asian ancestry controls	7q22.1	7	103251337	y	NR	DPY19L2P2			349152			rs6946892-C	rs6946892	0	6946892	intron_variant	0	0.7489	1e-07	7	(EA)	0.0413	[0.026-0.057] unit decrease	Illumina [~ 11800000] (imputed)	N
2017-11-30	29059683	Michailidou K	2017-10-23	Nature	www.ncbi.nlm.nih.gov/pubmed/29059683	Association analysis identifies 65 new breast cancer risk loci.	Breast cancer	76,192 European ancestry cases, 63,082 European ancestry controls	46,785 European ancestry cases, 42,892 European ancestry controls, 14,068 East Asian ancestry cases, 13,104 East Asian ancestry controls	17p11.2	17	18094293	y	NR	DRG2			1819			rs140494697-T	rs140494697	0	140494697	intron_variant	0	0.006	4e-06	5.39794	(EA)	0.2014	[0.12-0.29] unit increase	Illumina [~ 11800000] (imputed)	N
2017-11-30	29059683	Michailidou K	2017-10-23	Nature	www.ncbi.nlm.nih.gov/pubmed/29059683	Association analysis identifies 65 new breast cancer risk loci.	Breast cancer	76,192 European ancestry cases, 63,082 European ancestry controls	46,785 European ancestry cases, 42,892 European ancestry controls, 14,068 East Asian ancestry cases, 13,104 East Asian ancestry controls	5q33.3	5	158817075	y	EBF1	EBF1			1879			rs1432679-C	rs1432679	0	1432679	intron_variant	0	0.43	7e-31	30.1549	(EA)	1.08	[1.06-1.1] (Oncoarray)	Illumina [~ 11800000] (imputed)	N
2013-09-12	23535733	Garcia-Closas M	2013-04-01	Nat Genet	www.ncbi.nlm.nih.gov/pubmed/23535733	Genome-wide association studies identify four ER negative-specific breast cancer risk loci.	Breast cancer	4,193 European ancestry cases, 35,194 European ancestry controls	6,514 European ancestry cases, 41,455 European ancestry controls	5q33.3	5	158817075	y	EBF1	EBF1			1879			rs1432679-C	rs1432679	0	1432679	intron_variant	0	0.435	7e-06	5.1549		1.08	[1.04-1.11]	Illumina [NR]	N
2013-09-12	23535729	Michailidou K	2013-04-01	Nat Genet	www.ncbi.nlm.nih.gov/pubmed/23535729	Large-scale genotyping identifies 41 new loci associated with breast cancer risk.	Breast cancer	10,052 European ancestry cases, 12,575 European ancestry controls	45,290 European ancestry cases, 41,880 European ancestry controls	5q33.3	5	158817075	y	EBF1	EBF1			1879			rs1432679-C	rs1432679	0	1432679	intron_variant	0	0.43	2e-14	13.699		1.07	[1.05-1.09]	Affymetrix, Illumina [~ 2600000] (imputed)	N
2017-11-30	29059683	Michailidou K	2017-10-23	Nature	www.ncbi.nlm.nih.gov/pubmed/29059683	Association analysis identifies 65 new breast cancer risk loci.	Breast cancer	76,192 European ancestry cases, 63,082 European ancestry controls	46,785 European ancestry cases, 42,892 European ancestry controls, 14,068 East Asian ancestry cases, 13,104 East Asian ancestry controls	5q33.3	5	158905372	y	NR	EBF1			1879			rs17543752-C	rs17543752	0	17543752	intron_variant	0	0.3836	2e-19	18.699	(EA)	0.0574	[0.045-0.07] unit decrease	Illumina [~ 11800000] (imputed)	N
2017-11-30	29059683	Michailidou K	2017-10-23	Nature	www.ncbi.nlm.nih.gov/pubmed/29059683	Association analysis identifies 65 new breast cancer risk loci.	Breast cancer	76,192 European ancestry cases, 63,082 European ancestry controls	46,785 European ancestry cases, 42,892 European ancestry controls, 14,068 East Asian ancestry cases, 13,104 East Asian ancestry controls	5q33.3	5	158803005	y	NR	EBF1			1879			rs11135046-T	rs11135046	0	11135046	intron_variant	0	0.5529	5e-31	30.301	(EA)	0.0717	[0.06-0.084] unit decrease	Illumina [~ 11800000] (imputed)	N
2017-11-30	29059683	Michailidou K	2017-10-23	Nature	www.ncbi.nlm.nih.gov/pubmed/29059683	Association analysis identifies 65 new breast cancer risk loci.	Breast cancer	76,192 European ancestry cases, 63,082 European ancestry controls	46,785 European ancestry cases, 42,892 European ancestry controls, 14,068 East Asian ancestry cases, 13,104 East Asian ancestry controls	5q33.3	5	159008453	y	NR	EBF1			1879			rs11288072-C	rs11288072	0	11288072	intron_variant	0	0.3116	3e-13	12.5229	(EA)	0.0501	[0.037-0.064] unit decrease	Illumina [~ 11800000] (imputed)	N
2017-03-31	27117709	Couch FJ	2016-04-27	Nat Commun	www.ncbi.nlm.nih.gov/pubmed/27117709	Identification of four novel susceptibility loci for oestrogen receptor negative breast cancer.	Breast cancer	4,939 European ancestry estrogen receptor-negative cases, 14,352 European ancestry controls	7,333 European ancestry estrogen receptor-negative cases, 7,797 European ancestry BRCA1 mutation carrier cases, 7,455 European ancestry BRCA1 mutation carrier controls, 42,468 European ancestry controls	5q33.3	5	158817075	y	NR	EBF1			1879			rs1432679-?	rs1432679	0	1432679	intron_variant	0	0.44	2e-06	5.69897		1.04	[1.00-1.08] (BRCA1 carriers)	Illumina [10909381] (imputed)	N
2017-11-14	25751625	Michailidou K	2015-04-01	Nat Genet	www.ncbi.nlm.nih.gov/pubmed/25751625	Genome-wide association analysis of more than 120,000 individuals identifies 15 new susceptibility loci for breast cancer.	Breast cancer	15,748 European ancestry cases, 18,084 European ancestry controls	46,785 European ancestry cases, 42,892 European ancestry controls	5q33.3	5	158817075	y	NR	EBF1			1879			rs1432679-C	rs1432679	0	1432679	intron_variant	0	0.43	4e-16	15.3979		1.07	[1.05-1.09]	Affymetrix, Illumina [~ 11600000] (imputed)	N
2017-12-19	29058716	Milne RL	2017-10-23	Nat Genet	www.ncbi.nlm.nih.gov/pubmed/29058716	Identification of ten variants associated with risk of estrogen-receptor-negative breast cancer.	Breast cancer (estrogen-receptor negative)	14,135 European ancestry cases, 58,126 European ancestry controls	7,333 European ancestry cases, 42,468 European ancestry controls	5q33.3	5	158817075	y	NR	EBF1			1879			rs1432679-C	rs1432679	0	1432679	intron_variant	0	0.43	1e-10	10		1.08	[1.04-1.11] (Oncoarray)	Illumina [~ 11500000] (imputed)	N
2017-11-30	29059683	Michailidou K	2017-10-23	Nature	www.ncbi.nlm.nih.gov/pubmed/29059683	Association analysis identifies 65 new breast cancer risk loci.	Breast cancer	76,192 European ancestry cases, 63,082 European ancestry controls	46,785 European ancestry cases, 42,892 European ancestry controls, 14,068 East Asian ancestry cases, 13,104 East Asian ancestry controls	8p21.2	8	25974262	y	NR	EBF2			64641			rs13256025-T	rs13256025	0	13256025	intron_variant	0	0.1999	2e-07	6.69897	(EA)	0.0428	[0.027-0.059] unit increase	Illumina [~ 11800000] (imputed)	N
2017-11-30	29059683	Michailidou K	2017-10-23	Nature	www.ncbi.nlm.nih.gov/pubmed/29059683	Association analysis identifies 65 new breast cancer risk loci.	Breast cancer	76,192 European ancestry cases, 63,082 European ancestry controls	46,785 European ancestry cases, 42,892 European ancestry controls, 14,068 East Asian ancestry cases, 13,104 East Asian ancestry controls	2p23.3	2	25068670	y	NR	EFR3B			22979			rs1971136-T	rs1971136	0	1971136	intron_variant	0	0.5264	5e-09	8.30103	(EA)	0.0381	[0.025-0.051] unit increase	Illumina [~ 11800000] (imputed)	N
2017-11-30	29059683	Michailidou K	2017-10-23	Nature	www.ncbi.nlm.nih.gov/pubmed/29059683	Association analysis identifies 65 new breast cancer risk loci.	Breast cancer	76,192 European ancestry cases, 63,082 European ancestry controls	46,785 European ancestry cases, 42,892 European ancestry controls, 14,068 East Asian ancestry cases, 13,104 East Asian ancestry controls	7p11.2	7	55125270	y	NR	EGFR			1956			rs12718945-G	rs12718945	0	12718945	intron_variant	0	0.5535	4e-06	5.39794	(EA)	0.0289	[0.017-0.041] unit decrease	Illumina [~ 11800000] (imputed)	N
2017-11-30	29059683	Michailidou K	2017-10-23	Nature	www.ncbi.nlm.nih.gov/pubmed/29059683	Association analysis identifies 65 new breast cancer risk loci.	Breast cancer	76,192 European ancestry cases, 63,082 European ancestry controls	46,785 European ancestry cases, 42,892 European ancestry controls, 14,068 East Asian ancestry cases, 13,104 East Asian ancestry controls	10q21.3	10	62822722	y	NR	EGR2 - LOC107984012	1959	107984012		3555	70438	rs61865900-C	rs61865900	0	61865900	intron_variant	1	0.0623	2e-09	8.69897	(EA)	0.078	[0.053-0.103] unit decrease	Illumina [~ 11800000] (imputed)	N
2017-11-30	29059683	Michailidou K	2017-10-23	Nature	www.ncbi.nlm.nih.gov/pubmed/29059683	Association analysis identifies 65 new breast cancer risk loci.	Breast cancer	76,192 European ancestry cases, 63,082 European ancestry controls	46,785 European ancestry cases, 42,892 European ancestry controls, 14,068 East Asian ancestry cases, 13,104 East Asian ancestry controls	19p13.11	19	18460331	y	ELL	ELL			8178			rs4808801-A	rs4808801	0	4808801	intron_variant	0	0.66	5e-28	27.301	(EA)	1.07527	[1.05-1.1] (Oncoarray)	Illumina [~ 11800000] (imputed)	N
2017-11-14	25751625	Michailidou K	2015-04-01	Nat Genet	www.ncbi.nlm.nih.gov/pubmed/25751625	Genome-wide association analysis of more than 120,000 individuals identifies 15 new susceptibility loci for breast cancer.	Breast cancer	15,748 European ancestry cases, 18,084 European ancestry controls	46,785 European ancestry cases, 42,892 European ancestry controls	19p13.11	19	18460331	y	NR	ELL			8178			rs4808801-A	rs4808801	0	4808801	intron_variant	0	0.65	4e-15	14.3979		1.07527	[1.06-1.1]	Affymetrix, Illumina [~ 11600000] (imputed)	N
2017-12-19	29058716	Milne RL	2017-10-23	Nat Genet	www.ncbi.nlm.nih.gov/pubmed/29058716	Identification of ten variants associated with risk of estrogen-receptor-negative breast cancer.	Breast cancer (estrogen-receptor negative)	14,135 European ancestry cases, 58,126 European ancestry controls	7,333 European ancestry cases, 42,468 European ancestry controls	19p13.11	19	18460331	y	NR	ELL			8178			rs4808801-A	rs4808801	0	4808801	intron_variant	0	0.66	6e-06	5.22185		1.04167	[1.01-1.08] (Oncoarray)	Illumina [~ 11500000] (imputed)	N
2013-09-12	23535729	Michailidou K	2013-04-01	Nat Genet	www.ncbi.nlm.nih.gov/pubmed/23535729	Large-scale genotyping identifies 41 new loci associated with breast cancer risk.	Breast cancer	10,052 European ancestry cases, 12,575 European ancestry controls	45,290 European ancestry cases, 41,880 European ancestry controls	19p13.11	19	18460331	y	SSBP4, ISYNA1, ELL	ELL			8178			rs4808801-A	rs4808801	0	4808801	intron_variant	0	0.65	5e-15	14.301		1.08	[1.05-1.1]	Affymetrix, Illumina [~ 2600000] (imputed)	N
2017-11-30	29059683	Michailidou K	2017-10-23	Nature	www.ncbi.nlm.nih.gov/pubmed/29059683	Association analysis identifies 65 new breast cancer risk loci.	Breast cancer	76,192 European ancestry cases, 63,082 European ancestry controls	46,785 European ancestry cases, 42,892 European ancestry controls, 14,068 East Asian ancestry cases, 13,104 East Asian ancestry controls	19p13.11	19	18522945	y	NR	ELL - FKBP8	8178	23770		816	8807	rs172032-C	rs172032	0	172032	intergenic_variant	1	0.4209	1e-16	16	(EA)	0.0531	[0.041-0.066] unit decrease	Illumina [~ 11800000] (imputed)	N
2017-11-30	29059683	Michailidou K	2017-10-23	Nature	www.ncbi.nlm.nih.gov/pubmed/29059683	Association analysis identifies 65 new breast cancer risk loci.	Breast cancer	76,192 European ancestry cases, 63,082 European ancestry controls	46,785 European ancestry cases, 42,892 European ancestry controls, 14,068 East Asian ancestry cases, 13,104 East Asian ancestry controls	5q11.1	5	50491020	y	NR	EMB - LOC202319	133418	202319		47721	142077	rs145106188-CT	rs145106188	0	145106188	intergenic_variant	1	0.4459	3e-07	6.52288	(EA)	0.0343	[0.021-0.047] unit decrease	Illumina [~ 11800000] (imputed)	N
2017-11-30	29059683	Michailidou K	2017-10-23	Nature	www.ncbi.nlm.nih.gov/pubmed/29059683	Association analysis identifies 65 new breast cancer risk loci.	Breast cancer	76,192 European ancestry cases, 63,082 European ancestry controls	46,785 European ancestry cases, 42,892 European ancestry controls, 14,068 East Asian ancestry cases, 13,104 East Asian ancestry controls	1p11.2	1	121538815	y	EMBP1	EMBP1			647121			rs11249433-G	rs11249433	0	11249433	intron_variant	0	0.41	2e-52	51.699	(EA)	1.11	[1.09-1.13] (Oncoarray)	Illumina [~ 11800000] (imputed)	N
2009-04-03	19330030	Thomas G	2009-03-29	Nat Genet	www.ncbi.nlm.nih.gov/pubmed/19330030	A multistage genome-wide association study in breast cancer identifies two new risk alleles at 1p11.2 and 14q24.1 (RAD51L1).	Breast cancer	1,145 European ancestry cases, 1,142 European ancestry controls	8,625 European ancestry cases, 9,657 European ancestry controls	1p11.2	1	121538815	y	intergenic	EMBP1			647121			rs11249433-C	rs11249433	0	11249433	intron_variant	0	0.39	7e-10	9.1549		1.16	[1.09-1.24] (Het)	Illumina [528173]	N
2013-09-12	23535729	Michailidou K	2013-04-01	Nat Genet	www.ncbi.nlm.nih.gov/pubmed/23535729	Large-scale genotyping identifies 41 new loci associated with breast cancer risk.	Breast cancer	10,052 European ancestry cases, 12,575 European ancestry controls	45,290 European ancestry cases, 41,880 European ancestry controls	1p11.2	1	121538815	y	intergenic	EMBP1			647121			rs11249433-G	rs11249433	0	11249433	intron_variant	0	0.4	2e-26	25.699		1.09	[1.07-1.11]	Affymetrix, Illumina [~ 2600000] (imputed)	N
2017-11-14	25751625	Michailidou K	2015-04-01	Nat Genet	www.ncbi.nlm.nih.gov/pubmed/25751625	Genome-wide association analysis of more than 120,000 individuals identifies 15 new susceptibility loci for breast cancer.	Breast cancer	15,748 European ancestry cases, 18,084 European ancestry controls	46,785 European ancestry cases, 42,892 European ancestry controls	1p11.2	1	121538815	y	NR	EMBP1			647121			rs11249433-G	rs11249433	0	11249433	intron_variant	0	0.4	3e-27	26.5229		1.09	[1.07-1.12]	Affymetrix, Illumina [~ 11600000] (imputed)	N
2017-11-30	29059683	Michailidou K	2017-10-23	Nature	www.ncbi.nlm.nih.gov/pubmed/29059683	Association analysis identifies 65 new breast cancer risk loci.	Breast cancer	76,192 European ancestry cases, 63,082 European ancestry controls	46,785 European ancestry cases, 42,892 European ancestry controls, 14,068 East Asian ancestry cases, 13,104 East Asian ancestry controls	22q12.2	22	29225488	y	EM1D1	EMID1			129080			rs132390-C	rs132390	0	132390	intron_variant	0	0.04	1e-08	8	(EA)	1.04	[0.99-1.09] (Oncoarray)	Illumina [~ 11800000] (imputed)	N
2013-09-12	23535729	Michailidou K	2013-04-01	Nat Genet	www.ncbi.nlm.nih.gov/pubmed/23535729	Large-scale genotyping identifies 41 new loci associated with breast cancer risk.	Breast cancer	10,052 European ancestry cases, 12,575 European ancestry controls	45,290 European ancestry cases, 41,880 European ancestry controls	22q12.2	22	29225488	y	EMID1, RHBDD3, EWSR1, CHEK2	EMID1			129080			rs132390-C	rs132390	0	132390	intron_variant	0	0.036	3e-09	8.52288		1.12	[1.07-1.18]	Affymetrix, Illumina [~ 2600000] (imputed)	N
2017-11-14	25751625	Michailidou K	2015-04-01	Nat Genet	www.ncbi.nlm.nih.gov/pubmed/25751625	Genome-wide association analysis of more than 120,000 individuals identifies 15 new susceptibility loci for breast cancer.	Breast cancer	15,748 European ancestry cases, 18,084 European ancestry controls	46,785 European ancestry cases, 42,892 European ancestry controls	22q12.2	22	29225488	y	NR	EMID1			129080			rs132390-C	rs132390	0	132390	intron_variant	0	0.04	3e-09	8.52288		1.14	[1.08-1.2]	Affymetrix, Illumina [~ 11600000] (imputed)	N
2017-11-30	29059683	Michailidou K	2017-10-23	Nature	www.ncbi.nlm.nih.gov/pubmed/29059683	Association analysis identifies 65 new breast cancer risk loci.	Breast cancer	76,192 European ancestry cases, 63,082 European ancestry controls	46,785 European ancestry cases, 42,892 European ancestry controls, 14,068 East Asian ancestry cases, 13,104 East Asian ancestry controls	10q26.11	10	117502854	y	NR	EMX2OS			196047			rs2901157-G	rs2901157	0	2901157	intron_variant	0	0.1133	2e-06	5.69897	(EA)	0.0474	[0.028-0.067] unit decrease	Illumina [~ 11800000] (imputed)	N
2012-04-28	22452962	Kim HC	2012-03-27	Breast Cancer Res	www.ncbi.nlm.nih.gov/pubmed/22452962	A genome-wide association study identifies a breast cancer risk variant in ERBB4 at 2q34: results from the Seoul Breast Cancer Study.	Breast cancer	2,273 Korean ancestry cases, 2,052 Korean ancestry controls	4,049 Korean ancestry cases, 3,845 Korean ancestry controls	2q34	2	212432139	y	ERBB4	ERBB4			2066			rs13393577-T	rs13393577	0	13393577	intron_variant	0	0.051	9e-14	13.0458		1.53	[1.37-1.70]	Affymetrix [555525]	N
2017-11-30	29059683	Michailidou K	2017-10-23	Nature	www.ncbi.nlm.nih.gov/pubmed/29059683	Association analysis identifies 65 new breast cancer risk loci.	Breast cancer	76,192 European ancestry cases, 63,082 European ancestry controls	46,785 European ancestry cases, 42,892 European ancestry controls, 14,068 East Asian ancestry cases, 13,104 East Asian ancestry controls	1p36.23	1	8035440	y	NR	ERRFI1 - RPL7AP18	54206	390993		9107	21741	rs225132-G	rs225132	0	225132	intron_variant	1	0.187	3e-06	5.52288	(EA)	0.0375	[0.022-0.053] unit decrease	Illumina [~ 11800000] (imputed)	N
2012-03-17	22383897	Long J	2012-02-23	PLoS Genet	www.ncbi.nlm.nih.gov/pubmed/22383897	Genome-wide association study in east Asians identifies novel susceptibility loci for breast cancer.	Breast cancer	2,918 Chinese ancestry cases, 2,324 Chinese ancestry controls	up to 16,173 East Asian ancestry cases, up to 18,282 East Asian ancestry controls	6q25.1	6	151974478	y	ESR1	ESR1			2099			rs9383951-G	rs9383951	0	9383951	intron_variant	0	0.9	2e-06	5.69897		1.14	[1.08-1.19]	Affymetrix [690947]	N
2017-11-30	29059683	Michailidou K	2017-10-23	Nature	www.ncbi.nlm.nih.gov/pubmed/29059683	Association analysis identifies 65 new breast cancer risk loci.	Breast cancer	76,192 European ancestry cases, 63,082 European ancestry controls	46,785 European ancestry cases, 42,892 European ancestry controls, 14,068 East Asian ancestry cases, 13,104 East Asian ancestry controls	6q25.1	6	151734843	y	NR	ESR1			2099			rs6904031-T	rs6904031	0	6904031	intron_variant	0	0.0643	7e-26	25.1549	(EA)	0.1314	[0.11-0.16] unit increase	Illumina [~ 11800000] (imputed)	N
2017-11-30	29059683	Michailidou K	2017-10-23	Nature	www.ncbi.nlm.nih.gov/pubmed/29059683	Association analysis identifies 65 new breast cancer risk loci.	Breast cancer	76,192 European ancestry cases, 63,082 European ancestry controls	46,785 European ancestry cases, 42,892 European ancestry controls, 14,068 East Asian ancestry cases, 13,104 East Asian ancestry controls	6q25.1	6	151859461	y	NR	ESR1			2099			rs78796841-G	rs78796841	0	78796841	intron_variant	0	0.0214	8e-07	6.09691	(EA)	0.1097	[0.066-0.153] unit increase	Illumina [~ 11800000] (imputed)	N
2012-11-30	22976474	Siddiq A	2012-09-13	Hum Mol Genet	www.ncbi.nlm.nih.gov/pubmed/22976474	A meta-analysis of genome-wide association studies of breast cancer identifies two novel susceptibility loci at 6q14 and 20q11.	Breast cancer	3,666 European ancestry cases, 28,864 European ancestry controls, 1,004 African American cases, 2,744 African American controls	562 European ancestry cases, 6,410 European ancestry controls, 84 Japanese ancestry cases, 830 Japanese ancestry controls, 300 Latino cases, 1,164 Latino controls	6q25.1	6	151666222	y	NR	ESR1			2099			rs9383938-T	rs9383938	0	9383938	intron_variant	0	NR	2e-10	9.69897		1.28	[NR]	Illumina [2608509] (imputed)	N
2017-11-30	29059683	Michailidou K	2017-10-23	Nature	www.ncbi.nlm.nih.gov/pubmed/29059683	Association analysis identifies 65 new breast cancer risk loci.	Breast cancer	76,192 European ancestry cases, 63,082 European ancestry controls	46,785 European ancestry cases, 42,892 European ancestry controls, 14,068 East Asian ancestry cases, 13,104 East Asian ancestry controls	6q25.2	6	152115881	y	ESR1	ESR1 - SYNE1	2099	23345		12607	5803	rs2747652-C	rs2747652	0	2747652	intron_variant	1	0.52	1e-26	26	(EA)	1.06383	[1.04-1.09] (Oncoarray)	Illumina [~ 11800000] (imputed)	N
2017-12-19	29058716	Milne RL	2017-10-23	Nat Genet	www.ncbi.nlm.nih.gov/pubmed/29058716	Identification of ten variants associated with risk of estrogen-receptor-negative breast cancer.	Breast cancer (estrogen-receptor negative)	14,135 European ancestry cases, 58,126 European ancestry controls	7,333 European ancestry cases, 42,468 European ancestry controls	6q25.2	6	152115881	y	ESR1	ESR1 - SYNE1	2099	23345		12607	5803	rs2747652-C	rs2747652	0	2747652	intron_variant	1	0.52	2e-18	17.699		1.0989	[1.08-1.12]	Illumina [~ 11500000] (imputed)	N
2017-11-30	29059683	Michailidou K	2017-10-23	Nature	www.ncbi.nlm.nih.gov/pubmed/29059683	Association analysis identifies 65 new breast cancer risk loci.	Breast cancer	76,192 European ancestry cases, 63,082 European ancestry controls	46,785 European ancestry cases, 42,892 European ancestry controls, 14,068 East Asian ancestry cases, 13,104 East Asian ancestry controls	1q41	1	217047232	y	ESRRG	ESRRG			2104			rs11117758-A	rs11117758	0	11117758	intron_variant	0	0.79	4e-09	8.39794	(EA)	1.05263	[1.03-1.08] (Oncoarray)	Illumina [~ 11800000] (imputed)	N
2017-11-30	29059683	Michailidou K	2017-10-23	Nature	www.ncbi.nlm.nih.gov/pubmed/29059683	Association analysis identifies 65 new breast cancer risk loci.	Breast cancer	76,192 European ancestry cases, 63,082 European ancestry controls	46,785 European ancestry cases, 42,892 European ancestry controls, 14,068 East Asian ancestry cases, 13,104 East Asian ancestry controls	1q41	1	216850159	y	NR	ESRRG			2104			rs12095761-G	rs12095761	0	12095761	intron_variant	0	0.2306	3e-06	5.52288	(EA)	0.037	[0.022-0.052] unit increase	Illumina [~ 11800000] (imputed)	N
2017-11-30	29059683	Michailidou K	2017-10-23	Nature	www.ncbi.nlm.nih.gov/pubmed/29059683	Association analysis identifies 65 new breast cancer risk loci.	Breast cancer	76,192 European ancestry cases, 63,082 European ancestry controls	46,785 European ancestry cases, 42,892 European ancestry controls, 14,068 East Asian ancestry cases, 13,104 East Asian ancestry controls	22q12.2	22	29273659	y	NR	EWSR1			2130			rs4820803-C	rs4820803	0	4820803	intron_variant	0	0.1732	2e-06	5.69897	(EA)	0.0394	[0.023-0.055] unit decrease	Illumina [~ 11800000] (imputed)	N
2017-11-30	29059683	Michailidou K	2017-10-23	Nature	www.ncbi.nlm.nih.gov/pubmed/29059683	Association analysis identifies 65 new breast cancer risk loci.	Breast cancer	76,192 European ancestry cases, 63,082 European ancestry controls	46,785 European ancestry cases, 42,892 European ancestry controls, 14,068 East Asian ancestry cases, 13,104 East Asian ancestry controls	1q43	1	241870961	y	EXO1	EXO1			9156			rs72755295-G	rs72755295	0	72755295	intron_variant	0	0.03	2e-14	13.699	(EA)	1.15	[1.09-1.2] (Oncoarray)	Illumina [~ 11800000] (imputed)	N
2017-11-14	25751625	Michailidou K	2015-04-01	Nat Genet	www.ncbi.nlm.nih.gov/pubmed/25751625	Genome-wide association analysis of more than 120,000 individuals identifies 15 new susceptibility loci for breast cancer.	Breast cancer	15,748 European ancestry cases, 18,084 European ancestry controls	46,785 European ancestry cases, 42,892 European ancestry controls	1q43	1	241870961	y	EXO1	EXO1			9156			rs72755295-G	rs72755295	0	72755295	intron_variant	0	0.03	2e-08	7.69897		1.15	[1.09-1.22]	Affymetrix, Illumina [~ 11600000] (imputed)	N
2017-11-30	29059683	Michailidou K	2017-10-23	Nature	www.ncbi.nlm.nih.gov/pubmed/29059683	Association analysis identifies 65 new breast cancer risk loci.	Breast cancer	76,192 European ancestry cases, 63,082 European ancestry controls	46,785 European ancestry cases, 42,892 European ancestry controls, 14,068 East Asian ancestry cases, 13,104 East Asian ancestry controls	5p15.33	5	467862	y	NR	EXOC3			11336			rs190811224-T	rs190811224	0	190811224	3_prime_UTR_variant	0	0.7316	5e-06	5.30103	(EA)	0.037	[0.021-0.053] unit decrease	Illumina [~ 11800000] (imputed)	N
2017-11-30	29059683	Michailidou K	2017-10-23	Nature	www.ncbi.nlm.nih.gov/pubmed/29059683	Association analysis identifies 65 new breast cancer risk loci.	Breast cancer	76,192 European ancestry cases, 63,082 European ancestry controls	46,785 European ancestry cases, 42,892 European ancestry controls, 14,068 East Asian ancestry cases, 13,104 East Asian ancestry controls	8q24.11	8	117869627	y	NR	EXT1			2131			rs10103490-C	rs10103490	0	10103490	intron_variant	0	0.3554	4e-06	5.39794	(EA)	0.0319	[0.018-0.045] unit decrease	Illumina [~ 11800000] (imputed)	N
2017-11-30	29059683	Michailidou K	2017-10-23	Nature	www.ncbi.nlm.nih.gov/pubmed/29059683	Association analysis identifies 65 new breast cancer risk loci.	Breast cancer	76,192 European ancestry cases, 63,082 European ancestry controls	46,785 European ancestry cases, 42,892 European ancestry controls, 14,068 East Asian ancestry cases, 13,104 East Asian ancestry controls	1p32.3	1	50882601	y	NR	FAF1			11124			rs140945602-T	rs140945602	0	140945602	intron_variant	0	0.4877	7e-08	7.1549	(EA)	0.0359	[0.023-0.049] unit increase	Illumina [~ 11800000] (imputed)	N
2017-03-31	27117709	Couch FJ	2016-04-27	Nat Commun	www.ncbi.nlm.nih.gov/pubmed/27117709	Identification of four novel susceptibility loci for oestrogen receptor negative breast cancer.	Breast cancer	4,939 European ancestry estrogen receptor-negative cases, 14,352 European ancestry controls	7,333 European ancestry estrogen receptor-negative cases, 7,797 European ancestry BRCA1 mutation carrier cases, 7,455 European ancestry BRCA1 mutation carrier controls, 42,468 European ancestry controls	2q33.1	2	201071148	y	FAM126B, NDUFB3, CLK1, PPIL3	FAM126B			285172			rs114962751-?	rs114962751	0	114962751	intron_variant	0	0.02	7e-08	7.1549		1.22	[1.05-1.42] (BRCA1 carriers)	Illumina [10909381] (imputed)	N
2018-08-01	29698419	Pande M	2018-04-26	PLoS One	www.ncbi.nlm.nih.gov/pubmed/29698419	Genetic susceptibility markers for a breast-colorectal cancer phenotype: Exploratory results from genome-wide association studies.	Breast cancer and/or colorectal cancer	589 European ancestry colorectal cancer with a family history of breast cancer cases, 378 European ancestry breast cancer cases with a family history of colorectal cancer cases, 18 European ancestry breast and colorectal cancer cases, 1,769 European ancestry controls	NA	7p14.1	7	38712494	y	VPS41	FAM183B - VPS41	340286	27072		25405	10480	rs7794030-A	rs7794030	0	7794030	intergenic_variant	1	0.81	1e-06	6		1.43	[1.29-1.65]	Illumina [6220060] (imputed)	N
2017-11-30	29059683	Michailidou K	2017-10-23	Nature	www.ncbi.nlm.nih.gov/pubmed/29059683	Association analysis identifies 65 new breast cancer risk loci.	Breast cancer	76,192 European ancestry cases, 63,082 European ancestry controls	46,785 European ancestry cases, 42,892 European ancestry controls, 14,068 East Asian ancestry cases, 13,104 East Asian ancestry controls	7q22.1	7	102824804	y	NR	FAM185A, FBXL13			222234, 222235			rs57237364-C	rs57237364	0	57237364	intron_variant	0	0.3408	5e-07	6.30103	(EA)	0.0331	[0.02-0.046] unit increase	Illumina [~ 11800000] (imputed)	N
2017-11-30	29059683	Michailidou K	2017-10-23	Nature	www.ncbi.nlm.nih.gov/pubmed/29059683	Association analysis identifies 65 new breast cancer risk loci.	Breast cancer	76,192 European ancestry cases, 63,082 European ancestry controls	46,785 European ancestry cases, 42,892 European ancestry controls, 14,068 East Asian ancestry cases, 13,104 East Asian ancestry controls	10p15.1	10	5752689	y	NR	FAM208B			54906			rs55910451-G	rs55910451	0	55910451	intron_variant	0	0.218	4e-07	6.39794	(EA)	0.0377	[0.023-0.052] unit increase	Illumina [~ 11800000] (imputed)	N
2017-11-30	29059683	Michailidou K	2017-10-23	Nature	www.ncbi.nlm.nih.gov/pubmed/29059683	Association analysis identifies 65 new breast cancer risk loci.	Breast cancer	76,192 European ancestry cases, 63,082 European ancestry controls	46,785 European ancestry cases, 42,892 European ancestry controls, 14,068 East Asian ancestry cases, 13,104 East Asian ancestry controls	17q24.2	17	68557338	y	NR	FAM20A			54757			rs11655740-C	rs11655740	0	11655740	intron_variant	0	0.0302	7e-06	5.1549	(EA)	0.0906	[0.051-0.13] unit decrease	Illumina [~ 11800000] (imputed)	N
2017-11-30	29059683	Michailidou K	2017-10-23	Nature	www.ncbi.nlm.nih.gov/pubmed/29059683	Association analysis identifies 65 new breast cancer risk loci.	Breast cancer	76,192 European ancestry cases, 63,082 European ancestry controls	46,785 European ancestry cases, 42,892 European ancestry controls, 14,068 East Asian ancestry cases, 13,104 East Asian ancestry controls	6p12.1	6	54862053	y	NR	FAM83B			222584			rs924712-G	rs924712	0	924712	intron_variant	0	0.579	4e-06	5.39794	(EA)	0.0291	[0.017-0.041] unit increase	Illumina [~ 11800000] (imputed)	N
2008-09-10	17903305	Murabito JM	2007-09-19	BMC Med Genet	www.ncbi.nlm.nih.gov/pubmed/17903305	A genome-wide association study of breast and prostate cancer in the NHLBI's Framingham Heart Study.	Breast cancer	58 cases, 665 controls	NA	15q21.1	15	48608389	y	FBN1	FBN1			2200			rs1876206-?	rs1876206	0	1876206	intron_variant	0	NR	6e-06	5.22185				Affymetrix [70897]	N
2017-11-30	29059683	Michailidou K	2017-10-23	Nature	www.ncbi.nlm.nih.gov/pubmed/29059683	Association analysis identifies 65 new breast cancer risk loci.	Breast cancer	76,192 European ancestry cases, 63,082 European ancestry controls	46,785 European ancestry cases, 42,892 European ancestry controls, 14,068 East Asian ancestry cases, 13,104 East Asian ancestry controls	7q22.1	7	103022031	y	NR	FBXL13			222235			rs7458786-A	rs7458786	0	7458786	intron_variant	0	0.1665	9e-06	5.04576	(EA)	0.0379	[0.021-0.055] unit increase	Illumina [~ 11800000] (imputed)	N
2017-11-30	29059683	Michailidou K	2017-10-23	Nature	www.ncbi.nlm.nih.gov/pubmed/29059683	Association analysis identifies 65 new breast cancer risk loci.	Breast cancer	76,192 European ancestry cases, 63,082 European ancestry controls	46,785 European ancestry cases, 42,892 European ancestry controls, 14,068 East Asian ancestry cases, 13,104 East Asian ancestry controls	5p12	5	44302075	y	NR	FGF10			2255			rs13186320-T	rs13186320	0	13186320	intergenic_variant	0	0.515	5e-15	14.301	(EA)	0.0483	[0.036-0.06] unit increase	Illumina [~ 11800000] (imputed)	N
2018-12-14	30323354	Lee JY	2018-10-15	Sci Rep	www.ncbi.nlm.nih.gov/pubmed/30323354	BRCA1/2-negative, high-risk breast cancers (BRCAX) for Asian women: genetic susceptibility loci and their potential impacts.	BRCA1/2-negative high-risk breast cancer	1,469 Korean ancestry cases, 5,979 Korean ancestry controls	NA	10q26.13	10	121589148	y	FGFR2	FGFR2			2263			rs2912774-T	rs2912774	0	2912774	intron_variant	0	0.42	6e-07	6.22185		1.25	[1.14-1.36]	Affymetrix, Illumina [3378933] (imputed)	N
2018-12-14	30323354	Lee JY	2018-10-15	Sci Rep	www.ncbi.nlm.nih.gov/pubmed/30323354	BRCA1/2-negative, high-risk breast cancers (BRCAX) for Asian women: genetic susceptibility loci and their potential impacts.	BRCA1/2-negative high-risk breast cancer	1,469 Korean ancestry cases, 5,979 Korean ancestry controls	NA	10q26.13	10	121586602	y	FGFR2	FGFR2			2263			rs2981575-G	rs2981575	0	2981575	intron_variant	0	0.43	2e-08	7.69897		1.27	[NR]	Affymetrix, Illumina [3378933] (imputed)	N
2017-11-30	29059683	Michailidou K	2017-10-23	Nature	www.ncbi.nlm.nih.gov/pubmed/29059683	Association analysis identifies 65 new breast cancer risk loci.	Breast cancer	76,192 European ancestry cases, 63,082 European ancestry controls	46,785 European ancestry cases, 42,892 European ancestry controls, 14,068 East Asian ancestry cases, 13,104 East Asian ancestry controls	10q26.13	10	121589810	y	FGFR2	FGFR2			2263			rs45631563-A	rs45631563	0	45631563	intron_variant	0	0.95	7e-37	36.1549	(EA)	1.23457	[1.18-1.28] (Oncoarray)	Illumina [~ 11800000] (imputed)	N
2017-11-30	29059683	Michailidou K	2017-10-23	Nature	www.ncbi.nlm.nih.gov/pubmed/29059683	Association analysis identifies 65 new breast cancer risk loci.	Breast cancer	76,192 European ancestry cases, 63,082 European ancestry controls	46,785 European ancestry cases, 42,892 European ancestry controls, 14,068 East Asian ancestry cases, 13,104 East Asian ancestry controls	10q26.13	10	121580797	y	FGFR2	FGFR2			2263			rs2981578-C	rs2981578	0	2981578	intron_variant	0	0.47	1e-245	245		1.23	[1.21-1.25] (Oncoarray)	Illumina [~ 11800000] (imputed)	N
2017-11-30	29059683	Michailidou K	2017-10-23	Nature	www.ncbi.nlm.nih.gov/pubmed/29059683	Association analysis identifies 65 new breast cancer risk loci.	Breast cancer	76,192 European ancestry cases, 63,082 European ancestry controls	46,785 European ancestry cases, 42,892 European ancestry controls, 14,068 East Asian ancestry cases, 13,104 East Asian ancestry controls	10q26.13	10	121580918	y	FGFR2	FGFR2			2263			rs35054928-GC	rs35054928	0	35054928	intron_variant	0	0.4	2E-322	321.699		1.27	[1.25-1.3] (Oncoarray)	Illumina [~ 11800000] (imputed)	N
2010-10-15	20872241	Li J	2010-09-26	Breast Cancer Res Treat	www.ncbi.nlm.nih.gov/pubmed/20872241	A combined analysis of genome-wide association studies in breast cancer.	Breast cancer	2,702 European ancestry female cases, 5,726 European ancestry controls	Up to 7,386 cases, 7,576 controls	10q26.13	10	121586676	y	FGFR2	FGFR2			2263			rs1219648-G	rs1219648	0	1219648	intron_variant	0	0.42	2e-13	12.699		1.32	[1.22-1.42]	Illumina [285984]	N
2015-04-19	21263130	Fletcher O	2011-01-24	J Natl Cancer Inst	www.ncbi.nlm.nih.gov/pubmed/21263130	Novel breast cancer susceptibility locus at 9q31.2: results of a genome-wide association study.	Breast cancer	2,839 European ancestry cases, 3,507 European ancestry controls	9,041 European ancestry cases, 8,980 European ancestry controls	10q26.13	10	121586676	y	FGFR2	FGFR2			2263			rs1219648-?	rs1219648	0	1219648	intron_variant	0	0.42	1e-30	30		1.31	[1.25-1.37]	Illumina [~ 296114]	N
2008-06-16	17529967	Easton DF	2007-05-27	Nature	www.ncbi.nlm.nih.gov/pubmed/17529967	Genome-wide association study identifies novel breast cancer susceptibility loci.	Breast cancer	390 European ancestry cases, 364 European ancestry controls	4,364 East Asian ancestry cases, 24,174 European ancestry controls, 3,564 East Asian ancestry controls, 24,391 European ancestry controls	10q26.13	10	121592803	y	FGFR2	FGFR2			2263			rs2981582-A	rs2981582	0	2981582	intron_variant	0	0.38	2e-76	75.699		1.26	[1.23-1.30]	Perlegen [205586]	N
2008-06-16	17529973	Hunter DJ	2007-05-27	Nat Genet	www.ncbi.nlm.nih.gov/pubmed/17529973	A genome-wide association study identifies alleles in FGFR2 associated with risk of sporadic postmenopausal breast cancer.	Breast cancer	1,145 European ancestry cases, 1,142 European ancestry controls	874 European ancestry cases, 1,478 European ancestry controls, 302 cases, 594 controls	10q26.13	10	121586676	y	FGFR2	FGFR2			2263			rs1219648-G	rs1219648	0	1219648	intron_variant	0	0.4	1e-10	10		1.2	[1.07-1.42]	Illumina [528173]	N
2009-04-03	19330030	Thomas G	2009-03-29	Nat Genet	www.ncbi.nlm.nih.gov/pubmed/19330030	A multistage genome-wide association study in breast cancer identifies two new risk alleles at 1p11.2 and 14q24.1 (RAD51L1).	Breast cancer	1,145 European ancestry cases, 1,142 European ancestry controls	8,625 European ancestry cases, 9,657 European ancestry controls	10q26.13	10	121577821	y	FGFR2	FGFR2			2263			rs2981579-T	rs2981579	0	2981579	intron_variant	0	0.41	2e-10	9.69897		1.17	[1.07-1.27] (Het)	Illumina [528173]	N
2016-02-12	25956309	Palomba G	2015-05-10	BMC Cancer	www.ncbi.nlm.nih.gov/pubmed/25956309	Genome-wide association study of susceptibility loci for breast cancer in Sardinian population.	Breast cancer	1,367 Sardinian cases, 1,658 Sardinian controls	201 Sardinian cases, 1,467 Sardinian controls, 61,485 European ancestry cases, 60,860 European ancestry controls	10q26.13	10	121577603	y	FGFR2	FGFR2			2263			rs2912780-?	rs2912780	0	2912780	intron_variant	0	0.506	4e-06	5.39794		1.302	(1.164-1.456)	Affymetrix [2067645] (imputed)	N
2014-04-10	24143190	Low SK	2013-10-15	PLoS One	www.ncbi.nlm.nih.gov/pubmed/24143190	Genome-wide association study of breast cancer in the Japanese population.	Breast cancer	2,642 Japanese ancestry cases, 2,099 Japanese ancestry controls	2,885 Japanese ancestry cases, 3,395 Japanese ancestry controls	10q26.13	10	121580797	y	FGFR2	FGFR2			2263			rs2981578-C	rs2981578	0	2981578	intron_variant	0	0.514	1e-12	12		1.225	[1.158-1.296]	Illumina [5335291] (imputed)	N
2012-11-06	22951594	Elgazzar S	2012-09-06	J Hum Genet	www.ncbi.nlm.nih.gov/pubmed/22951594	A genome-wide association study identifies a genetic variant in the SIAH2 locus associated with hormonal receptor-positive breast cancer in Japanese.	Breast cancer	1,086 Japanese ancestry cases, 1,816 Japanese ancestry controls	1,653 Japanese ancestry cases, 2,797 Japanese ancestry controls	10q26.13	10	121573063	y	FGFR2	FGFR2			2263			rs3750817-T	rs3750817	0	3750817	intron_variant	0	0.49	8e-08	7.09691		1.22	[NR]	Illumina [453627]	N
2010-06-02	20453838	Turnbull C	2010-05-09	Nat Genet	www.ncbi.nlm.nih.gov/pubmed/20453838	Genome-wide association study identifies five new breast cancer susceptibility loci.	Breast cancer	3,659 European ancestry cases, 4,897 European ancestry controls	12,576 European ancestry cases, 12,223 European ancestry controls	10q26.13	10	121577821	y	FGFR2	FGFR2			2263			rs2981579-A	rs2981579	0	2981579	intron_variant	0	0.42	4e-31	30.3979		1.43	[1.35-1.53]	Illumina [582886]	N
2013-04-24	23354978	Rinella ES	2013-01-25	Hum Genet	www.ncbi.nlm.nih.gov/pubmed/23354978	Genetic variants associated with breast cancer risk for Ashkenazi Jewish women with strong family histories but no identifiable BRCA1/2 mutation.	Breast cancer	477 Ashkenazi Jewish cases, 524 Ashkenazi Jewish controls	203 Ashkenazi Jewish cases, 263 Ashkenazi Jewish contols	10q26.13	10	121579461	y	FGFR2	FGFR2			2263			rs1078806-C	rs1078806	0	1078806	intron_variant	0	0.39	2e-06	5.69897	(Pooled P value)	1.43	[NR]	Affymetrix [435632]	N
2013-09-12	23535729	Michailidou K	2013-04-01	Nat Genet	www.ncbi.nlm.nih.gov/pubmed/23535729	Large-scale genotyping identifies 41 new loci associated with breast cancer risk.	Breast cancer	10,052 European ancestry cases, 12,575 European ancestry controls	45,290 European ancestry cases, 41,880 European ancestry controls	10q26.13	10	121577821	y	FGFR2	FGFR2			2263			rs2981579-A	rs2981579	0	2981579	intron_variant	0	0.4	2e-170	169.699		1.27	[1.24-1.29]	Affymetrix, Illumina [~ 2600000] (imputed)	N
2014-10-17	24493630	Ahsan H	2014-02-03	Cancer Epidemiol Biomarkers Prev	www.ncbi.nlm.nih.gov/pubmed/24493630	A genome-wide association study of early-onset breast cancer identifies PFKM as a novel breast cancer gene and supports a common genetic spectrum for breast cancer at any age.	Breast cancer (early onset)	3,523 European ancestry young female cases, 2,702 European ancestry young female controls	3,470 European ancestry young female cases, 5,475 European ancestry young female controls	10q26.13	10	121589148	y	FGFR2	FGFR2			2263			rs2912774-?	rs2912774	0	2912774	intron_variant	0	0.44	3e-27	26.5229		1.29	[1.23-1.35]	Illumina [1265548] (imputed)	N
2010-12-09	21060860	Gaudet MM	2010-10-28	PLoS Genet	www.ncbi.nlm.nih.gov/pubmed/21060860	Common genetic variants and modification of penetrance of BRCA2-associated breast cancer.	Breast cancer in BRCA2 mutation carriers	899 European ancestry cases, 804 European ancestry controls	1,264 European ancestry cases, 1,222 European ancestry controls	10q26.13	10	121586602	y	FGFR2	FGFR2			2263			rs2981575-?	rs2981575	0	2981575	intron_variant	0	0.42	1e-08	8		1.28	[1.18-1.39]	Affymetrix [592163]	N
2017-11-30	29059683	Michailidou K	2017-10-23	Nature	www.ncbi.nlm.nih.gov/pubmed/29059683	Association analysis identifies 65 new breast cancer risk loci.	Breast cancer	76,192 European ancestry cases, 63,082 European ancestry controls	46,785 European ancestry cases, 42,892 European ancestry controls, 14,068 East Asian ancestry cases, 13,104 East Asian ancestry controls	10q26.13	10	121568362	y	NR	FGFR2			2263			rs10510097-T	rs10510097	0	10510097	intron_variant	0	0.1104	2e-58	57.699	(EA)	0.1546	[0.14-0.17] unit increase	Illumina [~ 11800000] (imputed)	N
2017-01-10	27354352	Han MR	2016-06-27	Hum Mol Genet	www.ncbi.nlm.nih.gov/pubmed/27354352	Genome-wide association study in East Asians identifies two novel breast cancer susceptibility loci.	Breast cancer	7,619 East Asian ancestry cases, 6,286 East Asian ancestry controls	6,605 East Asian ancestry cases, 8,543 East Asian ancestry controls	10q26.13	10	121586676	y	NR	FGFR2			2263			rs1219648-G	rs1219648	0	1219648	intron_variant	0	0.39	6e-09	8.22185		1.17	[1.11-1.23]	Affymetrix, Illumina [668499] (imputed)	N
2017-01-10	27354352	Han MR	2016-06-27	Hum Mol Genet	www.ncbi.nlm.nih.gov/pubmed/27354352	Genome-wide association study in East Asians identifies two novel breast cancer susceptibility loci.	Breast cancer	7,619 East Asian ancestry cases, 6,286 East Asian ancestry controls	6,605 East Asian ancestry cases, 8,543 East Asian ancestry controls	10q26.13	10	121592803	y	NR	FGFR2			2263			rs2981582-A	rs2981582	0	2981582	intron_variant	0	0.68	2e-08	7.69897		1.18	[1.11-1.23]	Affymetrix, Illumina [668499] (imputed)	N
2017-11-14	25751625	Michailidou K	2015-04-01	Nat Genet	www.ncbi.nlm.nih.gov/pubmed/25751625	Genome-wide association analysis of more than 120,000 individuals identifies 15 new susceptibility loci for breast cancer.	Breast cancer	15,748 European ancestry cases, 18,084 European ancestry controls	46,785 European ancestry cases, 42,892 European ancestry controls	10q26.13	10	121577821	y	NR	FGFR2			2263			rs2981579-A	rs2981579	0	2981579	intron_variant	0	0.4	6e-164	163.222		1.27	[1.24-1.29]	Affymetrix, Illumina [~ 11600000] (imputed)	N
2017-01-10	27354352	Han MR	2016-06-27	Hum Mol Genet	www.ncbi.nlm.nih.gov/pubmed/27354352	Genome-wide association study in East Asians identifies two novel breast cancer susceptibility loci.	Breast cancer	7,619 East Asian ancestry cases, 6,286 East Asian ancestry controls	6,605 East Asian ancestry cases, 8,543 East Asian ancestry controls	10q26.13	10	121577821	y		FGFR2			2263			rs2981579-A	rs2981579	0	2981579	intron_variant	0	0.55	3e-11	10.5229		1.19	[1.11-1.23]	Affymetrix, Illumina [668499] (imputed)	N
2017-11-30	29059683	Michailidou K	2017-10-23	Nature	www.ncbi.nlm.nih.gov/pubmed/29059683	Association analysis identifies 65 new breast cancer risk loci.	Breast cancer	76,192 European ancestry cases, 63,082 European ancestry controls	46,785 European ancestry cases, 42,892 European ancestry controls, 14,068 East Asian ancestry cases, 13,104 East Asian ancestry controls	3q26.31	3	172363569	y	NR	FNDC3B			64778			rs12152414-A	rs12152414	0	12152414	intron_variant	0	0.036	5e-06	5.30103	(EA)	0.083	[0.048-0.118] unit increase	Illumina [~ 11800000] (imputed)	N
2017-11-30	29059683	Michailidou K	2017-10-23	Nature	www.ncbi.nlm.nih.gov/pubmed/29059683	Association analysis identifies 65 new breast cancer risk loci.	Breast cancer	76,192 European ancestry cases, 63,082 European ancestry controls	46,785 European ancestry cases, 42,892 European ancestry controls, 14,068 East Asian ancestry cases, 13,104 East Asian ancestry controls	17q25.3	17	82597601	y	NR	FOXK2			3607			rs62079673-C	rs62079673	0	62079673	intron_variant	0	0.5948	1e-06	6	(EA)	0.0329	[0.02-0.046] unit decrease	Illumina [~ 11800000] (imputed)	N
2017-11-30	29059683	Michailidou K	2017-10-23	Nature	www.ncbi.nlm.nih.gov/pubmed/29059683	Association analysis identifies 65 new breast cancer risk loci.	Breast cancer	76,192 European ancestry cases, 63,082 European ancestry controls	46,785 European ancestry cases, 42,892 European ancestry controls, 14,068 East Asian ancestry cases, 13,104 East Asian ancestry controls	14q32.11	14	89418757	y	NR	FOXN3-AS1, FOXN3			400236, 1112			rs141061110-C	rs141061110	0	141061110	intron_variant	0	0.1578	5e-06	5.30103	(EA)	0.0408	[0.023-0.058] unit decrease	Illumina [~ 11800000] (imputed)	N
2017-11-30	29059683	Michailidou K	2017-10-23	Nature	www.ncbi.nlm.nih.gov/pubmed/29059683	Association analysis identifies 65 new breast cancer risk loci.	Breast cancer	76,192 European ancestry cases, 63,082 European ancestry controls	46,785 European ancestry cases, 42,892 European ancestry controls, 14,068 East Asian ancestry cases, 13,104 East Asian ancestry controls	3p13	3	71482962	y	FOXP1	FOXP1			27086			rs6805189-C	rs6805189	0	6805189	intron_variant	0	0.52	5e-08	7.30103	(EA)	1.03093	[1.01-1.05] (Oncoarray)	Illumina [~ 11800000] (imputed)	N
2013-09-12	23535729	Michailidou K	2013-04-01	Nat Genet	www.ncbi.nlm.nih.gov/pubmed/23535729	Large-scale genotyping identifies 41 new loci associated with breast cancer risk.	Breast cancer	10,052 European ancestry cases, 12,575 European ancestry controls	45,290 European ancestry cases, 41,880 European ancestry controls	6p25.3	6	1318643	y	FOXQ1	FOXQ1 - LINC01394	94234	106144586		3885	2566	rs11242675-T	rs11242675	0	11242675	regulatory_region_variant	1	0.61	7e-09	8.1549		1.06	[1.04-1.09]	Affymetrix, Illumina [~ 2600000] (imputed)	N
2017-11-30	29059683	Michailidou K	2017-10-23	Nature	www.ncbi.nlm.nih.gov/pubmed/29059683	Association analysis identifies 65 new breast cancer risk loci.	Breast cancer	76,192 European ancestry cases, 63,082 European ancestry controls	46,785 European ancestry cases, 42,892 European ancestry controls, 14,068 East Asian ancestry cases, 13,104 East Asian ancestry controls	6p25.3	6	1319077	y	NR	FOXQ1 - LINC01394	94234	106144586		4319	2132	rs80199833-T	rs80199833	0	80199833	intergenic_variant	1	0.2071	7e-06	5.1549	(EA)	0.0356	[0.02-0.051] unit decrease	Illumina [~ 11800000] (imputed)	N
2017-11-14	25751625	Michailidou K	2015-04-01	Nat Genet	www.ncbi.nlm.nih.gov/pubmed/25751625	Genome-wide association analysis of more than 120,000 individuals identifies 15 new susceptibility loci for breast cancer.	Breast cancer	15,748 European ancestry cases, 18,084 European ancestry controls	46,785 European ancestry cases, 42,892 European ancestry controls	6p25.3	6	1318643	y	NR	FOXQ1 - LINC01394	94234	106144586		3885	2566	rs11242675-T	rs11242675	0	11242675	regulatory_region_variant	1	0.62	1e-07	7		1.04167	[1.02-1.06]	Affymetrix, Illumina [~ 11600000] (imputed)	N
2017-11-30	29059683	Michailidou K	2017-10-23	Nature	www.ncbi.nlm.nih.gov/pubmed/29059683	Association analysis identifies 65 new breast cancer risk loci.	Breast cancer	76,192 European ancestry cases, 63,082 European ancestry controls	46,785 European ancestry cases, 42,892 European ancestry controls, 14,068 East Asian ancestry cases, 13,104 East Asian ancestry controls	10p13	10	13865236	y	NR	FRMD4A			55691			rs10906522-C	rs10906522	0	10906522	intron_variant	0	0.4708	1e-07	7	(EA)	0.0332	[0.021-0.046] unit increase	Illumina [~ 11800000] (imputed)	N
2017-11-30	29059683	Michailidou K	2017-10-23	Nature	www.ncbi.nlm.nih.gov/pubmed/29059683	Association analysis identifies 65 new breast cancer risk loci.	Breast cancer	76,192 European ancestry cases, 63,082 European ancestry controls	46,785 European ancestry cases, 42,892 European ancestry controls, 14,068 East Asian ancestry cases, 13,104 East Asian ancestry controls	16q12.2	16	53779455	y	FTO	FTO			79068			rs17817449-T	rs17817449	0	17817449	intron_variant	0	0.59	3e-21	20.5229	(EA)	1.05263	[1.04-1.08] (Oncoarray)	Illumina [~ 11800000] (imputed)	N
2017-11-30	29059683	Michailidou K	2017-10-23	Nature	www.ncbi.nlm.nih.gov/pubmed/29059683	Association analysis identifies 65 new breast cancer risk loci.	Breast cancer	76,192 European ancestry cases, 63,082 European ancestry controls	46,785 European ancestry cases, 42,892 European ancestry controls, 14,068 East Asian ancestry cases, 13,104 East Asian ancestry controls	16q12.2	16	53821379	y	FTO	FTO			79068			rs11075995-A	rs11075995	0	11075995	intron_variant	0	0.24	9e-09	8.04576	(EA)	1.03	[1.01-1.06] (Oncoarray)	Illumina [~ 11800000] (imputed)	N
2017-03-31	27117709	Couch FJ	2016-04-27	Nat Commun	www.ncbi.nlm.nih.gov/pubmed/27117709	Identification of four novel susceptibility loci for oestrogen receptor negative breast cancer.	Breast cancer	4,939 European ancestry estrogen receptor-negative cases, 14,352 European ancestry controls	7,333 European ancestry estrogen receptor-negative cases, 7,797 European ancestry BRCA1 mutation carrier cases, 7,455 European ancestry BRCA1 mutation carrier controls, 42,468 European ancestry controls	16q12.2	16	53779455	y	FTO	FTO			79068			rs17817449-?	rs17817449	0	17817449	intron_variant	0	0.59	5e-08	7.30103		1.05263	[1.01-1.09] (BRCA1 carriers)	Illumina [10909381] (imputed)	N
2017-03-31	27117709	Couch FJ	2016-04-27	Nat Commun	www.ncbi.nlm.nih.gov/pubmed/27117709	Identification of four novel susceptibility loci for oestrogen receptor negative breast cancer.	Breast cancer	4,939 European ancestry estrogen receptor-negative cases, 14,352 European ancestry controls	7,333 European ancestry estrogen receptor-negative cases, 7,797 European ancestry BRCA1 mutation carrier cases, 7,455 European ancestry BRCA1 mutation carrier controls, 42,468 European ancestry controls	16q12.2	16	53821379	y	FTO	FTO			79068			rs11075995-?	rs11075995	0	11075995	intron_variant	0	0.24	2e-06	5.69897		1.01	[0.97-1.06] (BRCA1 carriers)	Illumina [10909381] (imputed)	N
2017-12-19	29058716	Milne RL	2017-10-23	Nat Genet	www.ncbi.nlm.nih.gov/pubmed/29058716	Identification of ten variants associated with risk of estrogen-receptor-negative breast cancer.	Breast cancer (estrogen-receptor negative)	14,135 European ancestry cases, 58,126 European ancestry controls	7,333 European ancestry cases, 42,468 European ancestry controls	16q12.2	16	53821379	y	FTO	FTO			79068			rs11075995-A	rs11075995	0	11075995	intron_variant	0	0.3	1e-10	10		1.09	[1.06-1.12]	Illumina [~ 11500000] (imputed)	N
2017-03-31	27117709	Couch FJ	2016-04-27	Nat Commun	www.ncbi.nlm.nih.gov/pubmed/27117709	Identification of four novel susceptibility loci for oestrogen receptor negative breast cancer.	Breast cancer (estrogen-receptor negative)	4,939 European ancestry cases, 14,352 European ancestry controls	7,333 European ancestry cases, 42,468 European ancestry controls	16q12.2	16	53779455	y	FTO	FTO			79068			rs17817449-?	rs17817449	0	17817449	intron_variant	0	0.59	3e-07	6.52288		1.0989	[1.05-1.12]	Illumina [10909381] (imputed)	N
2017-03-31	27117709	Couch FJ	2016-04-27	Nat Commun	www.ncbi.nlm.nih.gov/pubmed/27117709	Identification of four novel susceptibility loci for oestrogen receptor negative breast cancer.	Breast cancer (estrogen-receptor negative)	4,939 European ancestry cases, 14,352 European ancestry controls	7,333 European ancestry cases, 42,468 European ancestry controls	16q12.2	16	53821379	y	FTO	FTO			79068			rs11075995-?	rs11075995	0	11075995	intron_variant	0	0.24	3e-08	7.52288		1.11	[1.07-1.15]	Illumina [10909381] (imputed)	N
2013-09-12	23535733	Garcia-Closas M	2013-04-01	Nat Genet	www.ncbi.nlm.nih.gov/pubmed/23535733	Genome-wide association studies identify four ER negative-specific breast cancer risk loci.	Breast cancer	4,193 European ancestry cases, 35,194 European ancestry controls	6,514 European ancestry cases, 41,455 European ancestry controls	16q12.2	16	53821379	y	FTO, KIAA1752	FTO			79068			rs11075995-?	rs11075995	0	11075995	intron_variant	0	0.24	4e-08	7.39794		1.11	[1.07-1.15]	Illumina [NR]	N
2013-09-12	23535733	Garcia-Closas M	2013-04-01	Nat Genet	www.ncbi.nlm.nih.gov/pubmed/23535733	Genome-wide association studies identify four ER negative-specific breast cancer risk loci.	Breast cancer	4,193 European ancestry cases, 35,194 European ancestry controls	6,514 European ancestry cases, 41,455 European ancestry controls	16q12.2	16	53779455	y	FTO, MIR1972-2	FTO			79068			rs17817449-T	rs17817449	0	17817449	intron_variant	0	0.526	6e-07	6.22185		1.09	[1.05-1.12]	Illumina [NR]	N
2013-09-12	23535729	Michailidou K	2013-04-01	Nat Genet	www.ncbi.nlm.nih.gov/pubmed/23535729	Large-scale genotyping identifies 41 new loci associated with breast cancer risk.	Breast cancer	10,052 European ancestry cases, 12,575 European ancestry controls	45,290 European ancestry cases, 41,880 European ancestry controls	16q12.2	16	53779455	y	FTO, MIR1972-2	FTO			79068			rs17817449-T	rs17817449	0	17817449	intron_variant	0	0.6	6e-14	13.2218		1.08	[1.05-1.1]	Affymetrix, Illumina [~ 2600000] (imputed)	N
2017-11-30	29059683	Michailidou K	2017-10-23	Nature	www.ncbi.nlm.nih.gov/pubmed/29059683	Association analysis identifies 65 new breast cancer risk loci.	Breast cancer	76,192 European ancestry cases, 63,082 European ancestry controls	46,785 European ancestry cases, 42,892 European ancestry controls, 14,068 East Asian ancestry cases, 13,104 East Asian ancestry controls	16q12.2	16	54107655	y	NR	FTO			79068			rs56077980-CT	rs56077980	0	56077980	intron_variant	0	0.3172	2e-07	6.69897	(EA)	0.0346	[0.021-0.048] unit increase	Illumina [~ 11800000] (imputed)	N
2017-11-30	29059683	Michailidou K	2017-10-23	Nature	www.ncbi.nlm.nih.gov/pubmed/29059683	Association analysis identifies 65 new breast cancer risk loci.	Breast cancer	76,192 European ancestry cases, 63,082 European ancestry controls	46,785 European ancestry cases, 42,892 European ancestry controls, 14,068 East Asian ancestry cases, 13,104 East Asian ancestry controls	16q12.2	16	53769311	y	NR	FTO			79068			rs62048402-A	rs62048402	0	62048402	intron_variant	0	0.4156	4e-23	22.3979	(EA)	0.0624	[0.05-0.075] unit decrease	Illumina [~ 11800000] (imputed)	N
2017-11-14	25751625	Michailidou K	2015-04-01	Nat Genet	www.ncbi.nlm.nih.gov/pubmed/25751625	Genome-wide association analysis of more than 120,000 individuals identifies 15 new susceptibility loci for breast cancer.	Breast cancer	15,748 European ancestry cases, 18,084 European ancestry controls	46,785 European ancestry cases, 42,892 European ancestry controls	16q12.2	16	53779455	y	NR	FTO			79068			rs17817449-T	rs17817449	0	17817449	intron_variant	0	0.6	2e-14	13.699		1.07527	[1.05-1.1]	Affymetrix, Illumina [~ 11600000] (imputed)	N
2017-11-14	25751625	Michailidou K	2015-04-01	Nat Genet	www.ncbi.nlm.nih.gov/pubmed/25751625	Genome-wide association analysis of more than 120,000 individuals identifies 15 new susceptibility loci for breast cancer.	Breast cancer	15,748 European ancestry cases, 18,084 European ancestry controls	46,785 European ancestry cases, 42,892 European ancestry controls	16q12.2	16	53821379	y	NR	FTO			79068			rs11075995-A	rs11075995	0	11075995	intron_variant	0	0.24	1e-06	6		1.04	[1.02-1.06]	Affymetrix, Illumina [~ 11600000] (imputed)	N
2017-12-19	29058716	Milne RL	2017-10-23	Nat Genet	www.ncbi.nlm.nih.gov/pubmed/29058716	Identification of ten variants associated with risk of estrogen-receptor-negative breast cancer.	Breast cancer (estrogen-receptor negative)	14,135 European ancestry cases, 58,126 European ancestry controls	7,333 European ancestry cases, 42,468 European ancestry controls	16q12.2	16	53779455	y	NR	FTO			79068			rs17817449-T	rs17817449	0	17817449	intron_variant	0	0.59	2e-10	9.69897		1.07527	[1.04-1.11] (Oncoarray)	Illumina [~ 11500000] (imputed)	N
2017-11-30	29059683	Michailidou K	2017-10-23	Nature	www.ncbi.nlm.nih.gov/pubmed/29059683	Association analysis identifies 65 new breast cancer risk loci.	Breast cancer	76,192 European ancestry cases, 63,082 European ancestry controls	46,785 European ancestry cases, 42,892 European ancestry controls, 14,068 East Asian ancestry cases, 13,104 East Asian ancestry controls	6q27	6	166087862	y	NR	GAPDHP72 - T	346085	6862		22360	69782	rs113289039-AG	rs113289039	0	113289039	intergenic_variant	1	0.3138	3e-07	6.52288	(EA)	0.0366	[0.023-0.051] unit decrease	Illumina [~ 11800000] (imputed)	N
2017-11-30	29059683	Michailidou K	2017-10-23	Nature	www.ncbi.nlm.nih.gov/pubmed/29059683	Association analysis identifies 65 new breast cancer risk loci.	Breast cancer	76,192 European ancestry cases, 63,082 European ancestry controls	46,785 European ancestry cases, 42,892 European ancestry controls, 14,068 East Asian ancestry cases, 13,104 East Asian ancestry controls	18q12.1	18	32397726	y	GAREM1	GAREM			64762			rs117618124-C	rs117618124	0	117618124	intron_variant	0	0.95	6e-12	11.2218	(EA)	1.1236	[1.09-1.18] (Oncoarray)	Illumina [~ 11800000] (imputed)	N
2017-12-19	29058716	Milne RL	2017-10-23	Nat Genet	www.ncbi.nlm.nih.gov/pubmed/29058716	Identification of ten variants associated with risk of estrogen-receptor-negative breast cancer.	Breast cancer (estrogen-receptor negative)	14,135 European ancestry cases, 58,126 European ancestry controls	7,333 European ancestry cases, 42,468 European ancestry controls	18q12.1	18	32397726	y	NR	GAREM			64762			rs117618124-T	rs117618124	0	117618124	intron_variant	0	0.95	5e-06	5.30103		1.19048	[1.1-1.3] (Oncoarray)	Illumina [~ 11500000] (imputed)	N
2017-11-30	29059683	Michailidou K	2017-10-23	Nature	www.ncbi.nlm.nih.gov/pubmed/29059683	Association analysis identifies 65 new breast cancer risk loci.	Breast cancer	76,192 European ancestry cases, 63,082 European ancestry controls	46,785 European ancestry cases, 42,892 European ancestry controls, 14,068 East Asian ancestry cases, 13,104 East Asian ancestry controls	19p13.11	19	19434887	y	GATAD2A, MIR640	GATAD2A			54815			rs2965183-G	rs2965183	0	2965183	intron_variant	0	0.35	6e-12	11.2218	(EA)	1.04	[1.02-1.06] (Oncoarray)	Illumina [~ 11800000] (imputed)	N
2010-06-02	20453838	Turnbull C	2010-05-09	Nat Genet	www.ncbi.nlm.nih.gov/pubmed/20453838	Genome-wide association study identifies five new breast cancer susceptibility loci.	Breast cancer	3,659 European ancestry cases, 4,897 European ancestry controls	12,576 European ancestry cases, 12,223 European ancestry controls	10p15.1	10	5844771	y	ANKRD16, FBXO18	GDI2 - TRV-TAC3-1	2665	100189342		31222	8940	rs2380205-C	rs2380205	0	2380205	intergenic_variant	1	0.57	5e-07	6.30103		1.06	[1.02-1.10]	Illumina [582886]	N
2017-11-30	29059683	Michailidou K	2017-10-23	Nature	www.ncbi.nlm.nih.gov/pubmed/29059683	Association analysis identifies 65 new breast cancer risk loci.	Breast cancer	76,192 European ancestry cases, 63,082 European ancestry controls	46,785 European ancestry cases, 42,892 European ancestry controls, 14,068 East Asian ancestry cases, 13,104 East Asian ancestry controls	19q13.32	19	45679775	y	GIPR	GIPR			2696			rs71338792-A	rs71338792	0	71338792	intron_variant	0	0.23	4e-09	8.39794	(EA)	1.05	[1.03-1.07] (Oncoarray)	Illumina [~ 11800000] (imputed)	N
2014-04-10	24143190	Low SK	2013-10-15	PLoS One	www.ncbi.nlm.nih.gov/pubmed/24143190	Genome-wide association study of breast cancer in the Japanese population.	Breast cancer	2,642 Japanese ancestry cases, 2,099 Japanese ancestry controls	2,885 Japanese ancestry cases, 3,395 Japanese ancestry controls	12p13.1	12	14257551	y	ATF7IP	GNAI2P1 - RPL30P11	2772	100271303		2065	99314	rs17221259-G	rs17221259	0	17221259	regulatory_region_variant	1	0.204	7e-06	5.1549		1.252	[1.136-1.381]	Illumina [5335291] (imputed)	N
2017-11-30	29059683	Michailidou K	2017-10-23	Nature	www.ncbi.nlm.nih.gov/pubmed/29059683	Association analysis identifies 65 new breast cancer risk loci.	Breast cancer	76,192 European ancestry cases, 63,082 European ancestry controls	46,785 European ancestry cases, 42,892 European ancestry controls, 14,068 East Asian ancestry cases, 13,104 East Asian ancestry controls	13q31.3	13	91903032	y	NR	GPC5			2262			rs3029748-CTT	rs3029748	0	3029748	intron_variant	0	0.535	4e-06	5.39794	(EA)	0.0298	[0.017-0.043] unit increase	Illumina [~ 11800000] (imputed)	N
2017-11-30	29059683	Michailidou K	2017-10-23	Nature	www.ncbi.nlm.nih.gov/pubmed/29059683	Association analysis identifies 65 new breast cancer risk loci.	Breast cancer	76,192 European ancestry cases, 63,082 European ancestry controls	46,785 European ancestry cases, 42,892 European ancestry controls, 14,068 East Asian ancestry cases, 13,104 East Asian ancestry controls	1q24.2	1	168127440	y	NR	GPR161			23432			rs60504827-T	rs60504827	0	60504827	intron_variant	0	0.1245	2e-07	6.69897	(EA)	0.053	[0.033-0.073] unit decrease	Illumina [~ 11800000] (imputed)	N
2017-11-30	29059683	Michailidou K	2017-10-23	Nature	www.ncbi.nlm.nih.gov/pubmed/29059683	Association analysis identifies 65 new breast cancer risk loci.	Breast cancer	76,192 European ancestry cases, 63,082 European ancestry controls	46,785 European ancestry cases, 42,892 European ancestry controls, 14,068 East Asian ancestry cases, 13,104 East Asian ancestry controls	2p25.1	2	11561717	y	NR	GREB1, RNA5SP85			9687, 100873318			rs113084984-A	rs113084984	0	113084984	non_coding_transcript_exon_variant	0	0.2192	5e-06	5.30103	(EA)	0.0367	[0.021-0.052] unit decrease	Illumina [~ 11800000] (imputed)	N
2017-11-30	29059683	Michailidou K	2017-10-23	Nature	www.ncbi.nlm.nih.gov/pubmed/29059683	Association analysis identifies 65 new breast cancer risk loci.	Breast cancer	76,192 European ancestry cases, 63,082 European ancestry controls	46,785 European ancestry cases, 42,892 European ancestry controls, 14,068 East Asian ancestry cases, 13,104 East Asian ancestry controls	2p25.1	2	9995553	y	GRHL1	GRHL1			29841			rs113577745-C	rs113577745	0	113577745	intron_variant	0	0.1	4e-10	9.39794	(EA)	1.08	[1.05-1.11] (Oncoarray)	Illumina [~ 11800000] (imputed)	N
2008-09-10	17903305	Murabito JM	2007-09-19	BMC Med Genet	www.ncbi.nlm.nih.gov/pubmed/17903305	A genome-wide association study of breast and prostate cancer in the NHLBI's Framingham Heart Study.	Breast cancer	58 cases, 665 controls	NA	21q21.3	21	29805194	y	GRIK1	GRIK1			2897			rs458685-?	rs458685	0	458685	intron_variant	0	NR	6e-06	5.22185				Affymetrix [70897]	N
2017-11-30	29059683	Michailidou K	2017-10-23	Nature	www.ncbi.nlm.nih.gov/pubmed/29059683	Association analysis identifies 65 new breast cancer risk loci.	Breast cancer	76,192 European ancestry cases, 63,082 European ancestry controls	46,785 European ancestry cases, 42,892 European ancestry controls, 14,068 East Asian ancestry cases, 13,104 East Asian ancestry controls	7q21.12	7	86844997	y	NR	GRM3			2913			rs1989796-C	rs1989796	0	1989796	intron_variant	0	0.5861	2e-06	5.69897	(EA)	0.0311	[0.018-0.044] unit decrease	Illumina [~ 11800000] (imputed)	N
2017-11-30	29059683	Michailidou K	2017-10-23	Nature	www.ncbi.nlm.nih.gov/pubmed/29059683	Association analysis identifies 65 new breast cancer risk loci.	Breast cancer	76,192 European ancestry cases, 63,082 European ancestry controls	46,785 European ancestry cases, 42,892 European ancestry controls, 14,068 East Asian ancestry cases, 13,104 East Asian ancestry controls	1p13.3	1	109680280	y	NR	GSTM2			2946			rs5776993-C	rs5776993	0	5776993	intron_variant	0	0.8767	2e-07	6.69897	(EA)	0.0563	[0.035-0.077] unit increase	Illumina [~ 11800000] (imputed)	N
2008-06-16	17529967	Easton DF	2007-05-27	Nature	www.ncbi.nlm.nih.gov/pubmed/17529967	Genome-wide association study identifies novel breast cancer susceptibility loci.	Breast cancer	390 European ancestry cases, 364 European ancestry controls	4,364 East Asian ancestry cases, 24,174 European ancestry controls, 3,564 East Asian ancestry controls, 24,391 European ancestry controls	5p12	5	45285616	y	intergenic	HCN1			348980			rs981782-C	rs981782	0	981782	intron_variant	0	0.53	9e-06	5.04576		1.04	[1.01-1.08]	Perlegen [205586]	N
2017-11-30	29059683	Michailidou K	2017-10-23	Nature	www.ncbi.nlm.nih.gov/pubmed/29059683	Association analysis identifies 65 new breast cancer risk loci.	Breast cancer	76,192 European ancestry cases, 63,082 European ancestry controls	46,785 European ancestry cases, 42,892 European ancestry controls, 14,068 East Asian ancestry cases, 13,104 East Asian ancestry controls	5p12	5	45522877	y	NR	HCN1			348980			rs139424826-A	rs139424826	0	139424826	intron_variant	0	0.15	5e-13	12.301	(EA)	0.0657	[0.048-0.084] unit decrease	Illumina [~ 11800000] (imputed)	N
2017-11-30	29059683	Michailidou K	2017-10-23	Nature	www.ncbi.nlm.nih.gov/pubmed/29059683	Association analysis identifies 65 new breast cancer risk loci.	Breast cancer	76,192 European ancestry cases, 63,082 European ancestry controls	46,785 European ancestry cases, 42,892 European ancestry controls, 14,068 East Asian ancestry cases, 13,104 East Asian ancestry controls	5p12	5	45653810	y	NR	HCN1			348980			rs2589161-C	rs2589161	0	2589161	intron_variant	0	0.4172	3e-08	7.52288	(EA)	0.0348	[0.022-0.047] unit increase	Illumina [~ 11800000] (imputed)	N
2017-11-30	29059683	Michailidou K	2017-10-23	Nature	www.ncbi.nlm.nih.gov/pubmed/29059683	Association analysis identifies 65 new breast cancer risk loci.	Breast cancer	76,192 European ancestry cases, 63,082 European ancestry controls	46,785 European ancestry cases, 42,892 European ancestry controls, 14,068 East Asian ancestry cases, 13,104 East Asian ancestry controls	5p12	5	45333758	y	NR	HCN1			348980			rs55821517-C	rs55821517	0	55821517	intron_variant	0	0.266	5e-19	18.301	(EA)	0.0639	[0.05-0.078] unit decrease	Illumina [~ 11800000] (imputed)	N
2017-11-30	29059683	Michailidou K	2017-10-23	Nature	www.ncbi.nlm.nih.gov/pubmed/29059683	Association analysis identifies 65 new breast cancer risk loci.	Breast cancer	76,192 European ancestry cases, 63,082 European ancestry controls	46,785 European ancestry cases, 42,892 European ancestry controls, 14,068 East Asian ancestry cases, 13,104 East Asian ancestry controls	5q11.1	5	50345811	y	intergenic	HCN1 - EMB	348980	133418		4649693	50381	rs72749841-C	rs72749841	0	72749841	intergenic_variant	1	0.84	7e-10	9.1549	(EA)	1.07527	[1.04-1.1] (Oncoarray)	Illumina [~ 11800000] (imputed)	N
2017-11-30	29059683	Michailidou K	2017-10-23	Nature	www.ncbi.nlm.nih.gov/pubmed/29059683	Association analysis identifies 65 new breast cancer risk loci.	Breast cancer	76,192 European ancestry cases, 63,082 European ancestry controls	46,785 European ancestry cases, 42,892 European ancestry controls, 14,068 East Asian ancestry cases, 13,104 East Asian ancestry controls	5p11	5	46394269	y	NR	HCN1 - EMB	348980	133418		698151	4001923	rs142427110-A	rs142427110	0	142427110	intergenic_variant	1	0.1376	1e-12	12	(EA)	0.069	[0.05-0.088] unit decrease	Illumina [~ 11800000] (imputed)	N
2017-11-30	29059683	Michailidou K	2017-10-23	Nature	www.ncbi.nlm.nih.gov/pubmed/29059683	Association analysis identifies 65 new breast cancer risk loci.	Breast cancer	76,192 European ancestry cases, 63,082 European ancestry controls	46,785 European ancestry cases, 42,892 European ancestry controls, 14,068 East Asian ancestry cases, 13,104 East Asian ancestry controls	5p12	5	45984331	y	NR	HCN1 - EMB	348980	133418		288213	4411861	rs72751936-A	rs72751936	0	72751936	intergenic_variant	1	0.1354	4e-12	11.3979	(EA)	0.0667	[0.048-0.086] unit decrease	Illumina [~ 11800000] (imputed)	N
2017-11-30	29059683	Michailidou K	2017-10-23	Nature	www.ncbi.nlm.nih.gov/pubmed/29059683	Association analysis identifies 65 new breast cancer risk loci.	Breast cancer	76,192 European ancestry cases, 63,082 European ancestry controls	46,785 European ancestry cases, 42,892 European ancestry controls, 14,068 East Asian ancestry cases, 13,104 East Asian ancestry controls	5p12	5	46090449	y	NR	HCN1 - EMB	348980	133418		394331	4305743	rs72755643-G	rs72755643	0	72755643	intergenic_variant	1	0.1333	3e-11	10.5229	(EA)	0.0652	[0.046-0.084] unit decrease	Illumina [~ 11800000] (imputed)	N
2017-11-30	29059683	Michailidou K	2017-10-23	Nature	www.ncbi.nlm.nih.gov/pubmed/29059683	Association analysis identifies 65 new breast cancer risk loci.	Breast cancer	76,192 European ancestry cases, 63,082 European ancestry controls	46,785 European ancestry cases, 42,892 European ancestry controls, 14,068 East Asian ancestry cases, 13,104 East Asian ancestry controls	5p12	5	45846518	y	NR	HCN1 - EMB	348980	133418		150400	4549674	rs72765759-T	rs72765759	0	72765759	intergenic_variant	1	0.1345	6e-13	12.2218	(EA)	0.0693	[0.05-0.088] unit decrease	Illumina [~ 11800000] (imputed)	N
2017-11-30	29059683	Michailidou K	2017-10-23	Nature	www.ncbi.nlm.nih.gov/pubmed/29059683	Association analysis identifies 65 new breast cancer risk loci.	Breast cancer	76,192 European ancestry cases, 63,082 European ancestry controls	46,785 European ancestry cases, 42,892 European ancestry controls, 14,068 East Asian ancestry cases, 13,104 East Asian ancestry controls	8q21.13	8	75318066	y	intergenic	HIGD1AP6 - PKMP4	100874436	106480443		15492	58643	rs6472903-T	rs6472903	0	6472903	intron_variant	1	0.83	4e-21	20.3979	(EA)	1.06383	[1.04-1.09] (Oncoarray)	Illumina [~ 11800000] (imputed)	N
2013-09-12	23535729	Michailidou K	2013-04-01	Nat Genet	www.ncbi.nlm.nih.gov/pubmed/23535729	Large-scale genotyping identifies 41 new loci associated with breast cancer risk.	Breast cancer	10,052 European ancestry cases, 12,575 European ancestry controls	45,290 European ancestry cases, 41,880 European ancestry controls	8q21.13	8	75318066	y	intergenic	HIGD1AP6 - PKMP4	100874436	106480443		15492	58643	rs6472903-T	rs6472903	0	6472903	intron_variant	1	0.82	2e-17	16.699		1.1	[1.08-1.12]	Affymetrix, Illumina [~ 2600000] (imputed)	N
2017-11-14	25751625	Michailidou K	2015-04-01	Nat Genet	www.ncbi.nlm.nih.gov/pubmed/25751625	Genome-wide association analysis of more than 120,000 individuals identifies 15 new susceptibility loci for breast cancer.	Breast cancer	15,748 European ancestry cases, 18,084 European ancestry controls	46,785 European ancestry cases, 42,892 European ancestry controls	8q21.13	8	75318066	y	NR	HIGD1AP6 - PKMP4	100874436	106480443		15492	58643	rs6472903-T	rs6472903	0	6472903	intron_variant	1	0.82	1e-16	16		1.0989	[1.08-1.12]	Affymetrix, Illumina [~ 11600000] (imputed)	N
2017-11-30	29059683	Michailidou K	2017-10-23	Nature	www.ncbi.nlm.nih.gov/pubmed/29059683	Association analysis identifies 65 new breast cancer risk loci.	Breast cancer	76,192 European ancestry cases, 63,082 European ancestry controls	46,785 European ancestry cases, 42,892 European ancestry controls, 14,068 East Asian ancestry cases, 13,104 East Asian ancestry controls	6p22.2	6	26175638	y	NR	HIST1H2BD - HIST1H2BE	3017	8344		4289	8158	rs17598658-C	rs17598658	0	17598658	intron_variant	1	0.0823	2e-09	8.69897	(EA)	0.0726	[0.049-0.097] unit decrease	Illumina [~ 11800000] (imputed)	N
2017-11-30	29059683	Michailidou K	2017-10-23	Nature	www.ncbi.nlm.nih.gov/pubmed/29059683	Association analysis identifies 65 new breast cancer risk loci.	Breast cancer	76,192 European ancestry cases, 63,082 European ancestry controls	46,785 European ancestry cases, 42,892 European ancestry controls, 14,068 East Asian ancestry cases, 13,104 East Asian ancestry controls	1q21.2	1	149811278	y	NR	HIST2H2BF			440689			rs57324102-A	rs57324102	0	57324102	3_prime_UTR_variant	0	0.0453	6e-06	5.22185	(EA)	0.0885	[0.05-0.127] unit decrease	Illumina [~ 11800000] (imputed)	N
2017-11-30	29059683	Michailidou K	2017-10-23	Nature	www.ncbi.nlm.nih.gov/pubmed/29059683	Association analysis identifies 65 new breast cancer risk loci.	Breast cancer	76,192 European ancestry cases, 63,082 European ancestry controls	46,785 European ancestry cases, 42,892 European ancestry controls, 14,068 East Asian ancestry cases, 13,104 East Asian ancestry controls	1p11.2	1	121121848	y	NR	HIST2H3DP1 - RPL22P6	106479023	100132047		3238	20201	rs369304377-G	rs369304377	1	61804016	intron_variant	1	0.3892	2e-29	28.699	(EA)	0.0885	[0.073-0.104] unit increase	Illumina [~ 11800000] (imputed)	N
2017-11-30	29059683	Michailidou K	2017-10-23	Nature	www.ncbi.nlm.nih.gov/pubmed/29059683	Association analysis identifies 65 new breast cancer risk loci.	Breast cancer	76,192 European ancestry cases, 63,082 European ancestry controls	46,785 European ancestry cases, 42,892 European ancestry controls, 14,068 East Asian ancestry cases, 13,104 East Asian ancestry controls	1p34.2	1	41671640	y	HIVEP3	HIVEP3			59269			rs79724016-G	rs79724016	0	79724016	intron_variant	0	0.97	4e-08	7.39794	(EA)	1.07527	[1.03-1.14] (Oncoarray)	Illumina [~ 11800000] (imputed)	N
2017-11-30	29059683	Michailidou K	2017-10-23	Nature	www.ncbi.nlm.nih.gov/pubmed/29059683	Association analysis identifies 65 new breast cancer risk loci.	Breast cancer	76,192 European ancestry cases, 63,082 European ancestry controls	46,785 European ancestry cases, 42,892 European ancestry controls, 14,068 East Asian ancestry cases, 13,104 East Asian ancestry controls	1p34.2	1	41532093	y	NR	HIVEP3			59269			rs181270898-A	rs181270898	0	181270898	intron_variant	0	0.0298	5e-07	6.30103	(EA)	0.097	[0.059-0.135] unit decrease	Illumina [~ 11800000] (imputed)	N
2017-11-30	29059683	Michailidou K	2017-10-23	Nature	www.ncbi.nlm.nih.gov/pubmed/29059683	Association analysis identifies 65 new breast cancer risk loci.	Breast cancer	76,192 European ancestry cases, 63,082 European ancestry controls	46,785 European ancestry cases, 42,892 European ancestry controls, 14,068 East Asian ancestry cases, 13,104 East Asian ancestry controls	1p34.2	1	41821259	y	NR	HIVEP3			59269			rs78295797-A	rs78295797	0	78295797	intron_variant	0	0.0241	9e-06	5.04576	(EA)	0.0953	[0.053-0.137] unit decrease	Illumina [~ 11800000] (imputed)	N
2017-11-30	29059683	Michailidou K	2017-10-23	Nature	www.ncbi.nlm.nih.gov/pubmed/29059683	Association analysis identifies 65 new breast cancer risk loci.	Breast cancer	76,192 European ancestry cases, 63,082 European ancestry controls	46,785 European ancestry cases, 42,892 European ancestry controls, 14,068 East Asian ancestry cases, 13,104 East Asian ancestry controls	8q21.13	8	75505702	y	HNF4G	HNF4G			3174			rs2943559-G	rs2943559	0	2943559	intron_variant	0	0.08	4e-24	23.3979	(EA)	1.1	[1.07-1.14] (Oncoarray)	Illumina [~ 11800000] (imputed)	N
2013-09-12	23535729	Michailidou K	2013-04-01	Nat Genet	www.ncbi.nlm.nih.gov/pubmed/23535729	Large-scale genotyping identifies 41 new loci associated with breast cancer risk.	Breast cancer	10,052 European ancestry cases, 12,575 European ancestry controls	45,290 European ancestry cases, 41,880 European ancestry controls	8q21.13	8	75505702	y	HNF4G	HNF4G			3174			rs2943559-G	rs2943559	0	2943559	intron_variant	0	0.07	6e-15	14.2218		1.13	[1.09-1.17	Affymetrix, Illumina [~ 2600000] (imputed)	N
2017-11-30	29059683	Michailidou K	2017-10-23	Nature	www.ncbi.nlm.nih.gov/pubmed/29059683	Association analysis identifies 65 new breast cancer risk loci.	Breast cancer	76,192 European ancestry cases, 63,082 European ancestry controls	46,785 European ancestry cases, 42,892 European ancestry controls, 14,068 East Asian ancestry cases, 13,104 East Asian ancestry controls	8q21.13	8	75498626	y	NR	HNF4G			3174			rs2926585-G	rs2926585	0	2926585	intron_variant	0	0.0762	3e-24	23.5229	(EA)	0.1156	[0.093-0.138] unit increase	Illumina [~ 11800000] (imputed)	N
2017-11-14	25751625	Michailidou K	2015-04-01	Nat Genet	www.ncbi.nlm.nih.gov/pubmed/25751625	Genome-wide association analysis of more than 120,000 individuals identifies 15 new susceptibility loci for breast cancer.	Breast cancer	15,748 European ancestry cases, 18,084 European ancestry controls	46,785 European ancestry cases, 42,892 European ancestry controls	8q21.13	8	75505702	y	NR	HNF4G			3174			rs2943559-G	rs2943559	0	2943559	intron_variant	0	0.07	1e-16	16		1.13	[1.09-1.17]	Affymetrix, Illumina [~ 11600000] (imputed)	N
2017-12-19	29058716	Milne RL	2017-10-23	Nat Genet	www.ncbi.nlm.nih.gov/pubmed/29058716	Identification of ten variants associated with risk of estrogen-receptor-negative breast cancer.	Breast cancer (estrogen-receptor negative)	14,135 European ancestry cases, 58,126 European ancestry controls	7,333 European ancestry cases, 42,468 European ancestry controls	8q21.13	8	75505702	y	NR	HNF4G			3174			rs2943559-G	rs2943559	0	2943559	intron_variant	0	0.08	3e-06	5.52288		1.1	[1.04-1.16] (Oncoarray)	Illumina [~ 11500000] (imputed)	N
2017-11-30	29059683	Michailidou K	2017-10-23	Nature	www.ncbi.nlm.nih.gov/pubmed/29059683	Association analysis identifies 65 new breast cancer risk loci.	Breast cancer	76,192 European ancestry cases, 63,082 European ancestry controls	46,785 European ancestry cases, 42,892 European ancestry controls, 14,068 East Asian ancestry cases, 13,104 East Asian ancestry controls	8q21.13	8	75988094	y	NR	HNF4G - LOC105375906	3174	105375906		421260	56426	rs12682248-A	rs12682248	0	12682248	intergenic_variant	1	0.7442	2e-06	5.69897	(EA)	0.0347	[0.02-0.049] unit increase	Illumina [~ 11800000] (imputed)	N
2017-11-30	29059683	Michailidou K	2017-10-23	Nature	www.ncbi.nlm.nih.gov/pubmed/29059683	Association analysis identifies 65 new breast cancer risk loci.	Breast cancer	76,192 European ancestry cases, 63,082 European ancestry controls	46,785 European ancestry cases, 42,892 European ancestry controls, 14,068 East Asian ancestry cases, 13,104 East Asian ancestry controls	8q21.13	8	75626598	y	NR	HNF4G - LOC105375906	3174	105375906		59764	417922	rs200255906-A	rs200255906	0	200255906	regulatory_region_variant	1	0.081	2e-14	13.699	(EA)	0.0911	[0.068-0.114] unit increase	Illumina [~ 11800000] (imputed)	N
2017-11-30	29059683	Michailidou K	2017-10-23	Nature	www.ncbi.nlm.nih.gov/pubmed/29059683	Association analysis identifies 65 new breast cancer risk loci.	Breast cancer	76,192 European ancestry cases, 63,082 European ancestry controls	46,785 European ancestry cases, 42,892 European ancestry controls, 14,068 East Asian ancestry cases, 13,104 East Asian ancestry controls	8q21.13	8	75751646	y	NR	HNF4G - LOC105375906	3174	105375906		184812	292874	rs7844233-G	rs7844233	0	7844233	intergenic_variant	1	0.0642	6e-11	10.2218	(EA)	0.0813	[0.057-0.106] unit increase	Illumina [~ 11800000] (imputed)	N
2017-11-30	29059683	Michailidou K	2017-10-23	Nature	www.ncbi.nlm.nih.gov/pubmed/29059683	Association analysis identifies 65 new breast cancer risk loci.	Breast cancer	76,192 European ancestry cases, 63,082 European ancestry controls	46,785 European ancestry cases, 42,892 European ancestry controls, 14,068 East Asian ancestry cases, 13,104 East Asian ancestry controls	22q12.2	22	30168182	y	NR	HORMAD2			150280			rs139059349-C	rs139059349	0	139059349	intron_variant	0	0.0142	2e-07	6.69897	(EA)	0.1465	[0.092-0.201] unit increase	Illumina [~ 11800000] (imputed)	N
2017-11-30	29059683	Michailidou K	2017-10-23	Nature	www.ncbi.nlm.nih.gov/pubmed/29059683	Association analysis identifies 65 new breast cancer risk loci.	Breast cancer	76,192 European ancestry cases, 63,082 European ancestry controls	46,785 European ancestry cases, 42,892 European ancestry controls, 14,068 East Asian ancestry cases, 13,104 East Asian ancestry controls	22q12.2	22	30051113	y	NR	HORMAD2-AS1			101929664			rs188460188-C	rs188460188	0	188460188	intron_variant	0	0.0077	3e-08	7.52288	(EA)	0.237	[0.15-0.32] unit increase	Illumina [~ 11800000] (imputed)	N
2017-11-30	29059683	Michailidou K	2017-10-23	Nature	www.ncbi.nlm.nih.gov/pubmed/29059683	Association analysis identifies 65 new breast cancer risk loci.	Breast cancer	76,192 European ancestry cases, 63,082 European ancestry controls	46,785 European ancestry cases, 42,892 European ancestry controls, 14,068 East Asian ancestry cases, 13,104 East Asian ancestry controls	11p15.5	11	1995678	y	NR	HOTS, H19, MRPL23			103344718, 283120, 6150			rs217727-A	rs217727	0	217727	non_coding_transcript_exon_variant	0	0.1929	4e-14	13.3979	(EA)	0.0598	[0.044-0.075] unit decrease	Illumina [~ 11800000] (imputed)	N
2017-11-30	29059683	Michailidou K	2017-10-23	Nature	www.ncbi.nlm.nih.gov/pubmed/29059683	Association analysis identifies 65 new breast cancer risk loci.	Breast cancer	76,192 European ancestry cases, 63,082 European ancestry controls	46,785 European ancestry cases, 42,892 European ancestry controls, 14,068 East Asian ancestry cases, 13,104 East Asian ancestry controls	16q23.3	16	82039249	y	NR	HSD17B2			3294			rs56169712-TAC	rs56169712	0	56169712	intron_variant	0	0.5726	7e-06	5.1549	(EA)	0.0319	[0.018-0.046] unit decrease	Illumina [~ 11800000] (imputed)	N
2017-11-30	29059683	Michailidou K	2017-10-23	Nature	www.ncbi.nlm.nih.gov/pubmed/29059683	Association analysis identifies 65 new breast cancer risk loci.	Breast cancer	76,192 European ancestry cases, 63,082 European ancestry controls	46,785 European ancestry cases, 42,892 European ancestry controls, 14,068 East Asian ancestry cases, 13,104 East Asian ancestry controls	5q31.1	5	133071366	y	HSPA4	HSPA4			3308			rs6596100-T	rs6596100	0	6596100	intron_variant	0	0.75	8e-09	8.09691	(EA)	1.06383	[1.04-1.09] (Oncoarray)	Illumina [~ 11800000] (imputed)	N
2017-11-30	29059683	Michailidou K	2017-10-23	Nature	www.ncbi.nlm.nih.gov/pubmed/29059683	Association analysis identifies 65 new breast cancer risk loci.	Breast cancer	76,192 European ancestry cases, 63,082 European ancestry controls	46,785 European ancestry cases, 42,892 European ancestry controls, 14,068 East Asian ancestry cases, 13,104 East Asian ancestry controls	1q32.1	1	203938990	y	NR	HSPE1P6 - CBX1P3	106480254	100128723		34977	15408	rs2810650-G	rs2810650	0	2810650	intergenic_variant	1	0.2068	3e-09	8.52288	(EA)	0.0453	[0.03-0.06] unit increase	Illumina [~ 11800000] (imputed)	N
2017-11-30	29059683	Michailidou K	2017-10-23	Nature	www.ncbi.nlm.nih.gov/pubmed/29059683	Association analysis identifies 65 new breast cancer risk loci.	Breast cancer	76,192 European ancestry cases, 63,082 European ancestry controls	46,785 European ancestry cases, 42,892 European ancestry controls, 14,068 East Asian ancestry cases, 13,104 East Asian ancestry controls	1p36.13	1	18480845	y	KLHDC7A	IGSF21 - KLHDC7A	84966	127707		102362	85	rs2992756-C	rs2992756	0	2992756	regulatory_region_variant	1	0.49	2e-15	14.699	(EA)	1.06	[1.04-1.08] (Oncoarray)	Illumina [~ 11800000] (imputed)	N
2017-11-30	29059683	Michailidou K	2017-10-23	Nature	www.ncbi.nlm.nih.gov/pubmed/29059683	Association analysis identifies 65 new breast cancer risk loci.	Breast cancer	76,192 European ancestry cases, 63,082 European ancestry controls	46,785 European ancestry cases, 42,892 European ancestry controls, 14,068 East Asian ancestry cases, 13,104 East Asian ancestry controls	11q12.3	11	62126500	y	NR	INCENP			3619			rs7937840-T	rs7937840	0	7937840	intron_variant	0	0.2591	1e-06	6	(EA)	0.035	[0.021-0.049] unit increase	Illumina [~ 11800000] (imputed)	N
2017-11-30	29059683	Michailidou K	2017-10-23	Nature	www.ncbi.nlm.nih.gov/pubmed/29059683	Association analysis identifies 65 new breast cancer risk loci.	Breast cancer	76,192 European ancestry cases, 63,082 European ancestry controls	46,785 European ancestry cases, 42,892 European ancestry controls, 14,068 East Asian ancestry cases, 13,104 East Asian ancestry controls	11p15.2	11	15431096	y	NR	INSC - LOC105376569	387755	105376569		161421	121384	rs4757319-G	rs4757319	0	4757319	intergenic_variant	1	0.3857	3e-06	5.52288	(EA)	0.0298	[0.017-0.042] unit increase	Illumina [~ 11800000] (imputed)	N
2017-11-30	29059683	Michailidou K	2017-10-23	Nature	www.ncbi.nlm.nih.gov/pubmed/29059683	Association analysis identifies 65 new breast cancer risk loci.	Breast cancer	76,192 European ancestry cases, 63,082 European ancestry controls	46,785 European ancestry cases, 42,892 European ancestry controls, 14,068 East Asian ancestry cases, 13,104 East Asian ancestry controls	11p15.2	11	15309178	y	NR	INSC - LOC105376569	387755	105376569		39503	243302	rs5789877-ACT	rs5789877	0	5789877	intergenic_variant	1	0.6881	2e-06	5.69897	(EA)	0.0324	[0.019-0.046] unit decrease	Illumina [~ 11800000] (imputed)	N
2017-11-30	29059683	Michailidou K	2017-10-23	Nature	www.ncbi.nlm.nih.gov/pubmed/29059683	Association analysis identifies 65 new breast cancer risk loci.	Breast cancer	76,192 European ancestry cases, 63,082 European ancestry controls	46,785 European ancestry cases, 42,892 European ancestry controls, 14,068 East Asian ancestry cases, 13,104 East Asian ancestry controls	8p21.3	8	19828398	y	NR	INTS10			55174			rs7017697-T	rs7017697	0	7017697	intron_variant	0	0.6711	1e-06	6	(EA)	0.0319	[0.019-0.045] unit decrease	Illumina [~ 11800000] (imputed)	N
2017-11-30	29059683	Michailidou K	2017-10-23	Nature	www.ncbi.nlm.nih.gov/pubmed/29059683	Association analysis identifies 65 new breast cancer risk loci.	Breast cancer	76,192 European ancestry cases, 63,082 European ancestry controls	46,785 European ancestry cases, 42,892 European ancestry controls, 14,068 East Asian ancestry cases, 13,104 East Asian ancestry controls	5q31.1	5	132497907	y	NR	IRF1 - IL5	3659	3567		7118	41287	rs736801-T	rs736801	0	736801	intron_variant	1	0.3642	8e-08	7.09691	(EA)	0.0349	[0.022-0.048] unit increase	Illumina [~ 11800000] (imputed)	N
2017-11-30	29059683	Michailidou K	2017-10-23	Nature	www.ncbi.nlm.nih.gov/pubmed/29059683	Association analysis identifies 65 new breast cancer risk loci.	Breast cancer	76,192 European ancestry cases, 63,082 European ancestry controls	46,785 European ancestry cases, 42,892 European ancestry controls, 14,068 East Asian ancestry cases, 13,104 East Asian ancestry controls	16q22.2	16	71918418	y	NR	IST1			9798			rs71695136-C	rs71695136	0	71695136	intron_variant	0	0.7841	7e-07	6.1549	(EA)	0.0427	[0.026-0.06] unit decrease	Illumina [~ 11800000] (imputed)	N
2017-11-30	29059683	Michailidou K	2017-10-23	Nature	www.ncbi.nlm.nih.gov/pubmed/29059683	Association analysis identifies 65 new breast cancer risk loci.	Breast cancer	76,192 European ancestry cases, 63,082 European ancestry controls	46,785 European ancestry cases, 42,892 European ancestry controls, 14,068 East Asian ancestry cases, 13,104 East Asian ancestry controls	3p26.1	3	4700592	y	EGOT/ITPR1	ITPR1			3708			rs6762644-G	rs6762644	0	6762644	intron_variant	0	0.38	4e-18	17.3979	(EA)	1.05	[1.03-1.07] (Oncoarray)	Illumina [~ 11800000] (imputed)	N
2013-09-12	23535729	Michailidou K	2013-04-01	Nat Genet	www.ncbi.nlm.nih.gov/pubmed/23535729	Large-scale genotyping identifies 41 new loci associated with breast cancer risk.	Breast cancer	10,052 European ancestry cases, 12,575 European ancestry controls	45,290 European ancestry cases, 41,880 European ancestry controls	3p26.1	3	4700592	y	ITPR1, EGOT	ITPR1			3708			rs6762644-G	rs6762644	0	6762644	intron_variant	0	0.4	2e-12	11.699		1.07	[1.04-1.09]	Affymetrix, Illumina [~ 2600000] (imputed)	N
2017-11-30	29059683	Michailidou K	2017-10-23	Nature	www.ncbi.nlm.nih.gov/pubmed/29059683	Association analysis identifies 65 new breast cancer risk loci.	Breast cancer	76,192 European ancestry cases, 63,082 European ancestry controls	46,785 European ancestry cases, 42,892 European ancestry controls, 14,068 East Asian ancestry cases, 13,104 East Asian ancestry controls	3p26.1	3	4686890	y	NR	ITPR1			3708			rs6787391-T	rs6787391	0	6787391	intron_variant	0	0.3807	9e-19	18.0458	(EA)	0.0567	[0.044-0.069] unit increase	Illumina [~ 11800000] (imputed)	N
2017-11-14	25751625	Michailidou K	2015-04-01	Nat Genet	www.ncbi.nlm.nih.gov/pubmed/25751625	Genome-wide association analysis of more than 120,000 individuals identifies 15 new susceptibility loci for breast cancer.	Breast cancer	15,748 European ancestry cases, 18,084 European ancestry controls	46,785 European ancestry cases, 42,892 European ancestry controls	3p26.1	3	4700592	y	NR	ITPR1			3708			rs6762644-G	rs6762644	0	6762644	intron_variant	0	0.4	9e-12	11.0458		1.07	[1.05-1.09]	Affymetrix, Illumina [~ 11600000] (imputed)	N
2017-11-30	29059683	Michailidou K	2017-10-23	Nature	www.ncbi.nlm.nih.gov/pubmed/29059683	Association analysis identifies 65 new breast cancer risk loci.	Breast cancer	76,192 European ancestry cases, 63,082 European ancestry controls	46,785 European ancestry cases, 42,892 European ancestry controls, 14,068 East Asian ancestry cases, 13,104 East Asian ancestry controls	10q21.3	10	63497603	y	NR	JMJD1C			221037			rs34044188-T	rs34044188	0	34044188	intron_variant	0	0.0373	3e-07	6.52288	(EA)	0.0953	[0.059-0.132] unit decrease	Illumina [~ 11800000] (imputed)	N
2017-11-30	29059683	Michailidou K	2017-10-23	Nature	www.ncbi.nlm.nih.gov/pubmed/29059683	Association analysis identifies 65 new breast cancer risk loci.	Breast cancer	76,192 European ancestry cases, 63,082 European ancestry controls	46,785 European ancestry cases, 42,892 European ancestry controls, 14,068 East Asian ancestry cases, 13,104 East Asian ancestry controls	10q21.3	10	63349742	y	NR	JMJD1C			221037			rs35632171-G	rs35632171	0	35632171	intron_variant	0	0.0418	3e-07	6.52288	(EA)	0.0915	[0.057-0.126] unit decrease	Illumina [~ 11800000] (imputed)	N
2017-11-30	29059683	Michailidou K	2017-10-23	Nature	www.ncbi.nlm.nih.gov/pubmed/29059683	Association analysis identifies 65 new breast cancer risk loci.	Breast cancer	76,192 European ancestry cases, 63,082 European ancestry controls	46,785 European ancestry cases, 42,892 European ancestry controls, 14,068 East Asian ancestry cases, 13,104 East Asian ancestry controls	10q21.3	10	63197831	y	NR	JMJD1C			221037			rs35997229-C	rs35997229	0	35997229	intron_variant	0	0.0431	3e-07	6.52288	(EA)	0.0829	[0.051-0.115] unit decrease	Illumina [~ 11800000] (imputed)	N
2017-11-30	29059683	Michailidou K	2017-10-23	Nature	www.ncbi.nlm.nih.gov/pubmed/29059683	Association analysis identifies 65 new breast cancer risk loci.	Breast cancer	76,192 European ancestry cases, 63,082 European ancestry controls	46,785 European ancestry cases, 42,892 European ancestry controls, 14,068 East Asian ancestry cases, 13,104 East Asian ancestry controls	17q21.31	17	46175102	y	KANSL1	KANSL1			284058			rs2532263-A	rs2532263	0	2532263	intron_variant	0	0.81	7e-13	12.1549	(EA)	1.05263	[1.03-1.08] (Oncoarray)	Illumina [~ 11800000] (imputed)	N
2015-12-07	25890600	Guo Q	2015-04-18	J Natl Cancer Inst	www.ncbi.nlm.nih.gov/pubmed/25890600	Identification of novel genetic markers of breast cancer survival.	Breast cancer (survival)	23,059 European ancestry estrogen-receptor positive cases, 6,881 European ancestry estrogen-receptor negative cases, 8,014 European ancestry cases		2q24.3	2	162922103	y	KCNH7, BC042876	KCNH7 - RPL7P61	90134	101929589		83356	230148	rs148760487-?	rs148760487	0	148760487	intergenic_variant	1	0.01	2e-08	7.69897		1.88	[1.51-2.34]	Affymetrix, Illumina [9000000] (imputed)	N
2017-11-30	29059683	Michailidou K	2017-10-23	Nature	www.ncbi.nlm.nih.gov/pubmed/29059683	Association analysis identifies 65 new breast cancer risk loci.	Breast cancer	76,192 European ancestry cases, 63,082 European ancestry controls	46,785 European ancestry cases, 42,892 European ancestry controls, 14,068 East Asian ancestry cases, 13,104 East Asian ancestry controls	19q13.31	19	43779080	y	NR	KCNN4			3783			rs1685191-T	rs1685191	0	1685191	intron_variant	0	0.5647	4e-20	19.3979	(EA)	0.0586	[0.046-0.071] unit decrease	Illumina [~ 11800000] (imputed)	N
2013-09-12	23535729	Michailidou K	2013-04-01	Nat Genet	www.ncbi.nlm.nih.gov/pubmed/23535729	Large-scale genotyping identifies 41 new loci associated with breast cancer risk.	Breast cancer	10,052 European ancestry cases, 12,575 European ancestry controls	45,290 European ancestry cases, 41,880 European ancestry controls	19q13.31	19	43782361	y	C19orf61, KCNN4, LYPD5, ZNF283	KCNN4 - LOC107987268	3783	107987268		222	1931	rs3760982-A	rs3760982	0	3760982	intergenic_variant	1	0.46	2e-10	9.69897		1.06	[1.04-1.08]	Affymetrix, Illumina [~ 2600000] (imputed)	N
2017-11-30	29059683	Michailidou K	2017-10-23	Nature	www.ncbi.nlm.nih.gov/pubmed/29059683	Association analysis identifies 65 new breast cancer risk loci.	Breast cancer	76,192 European ancestry cases, 63,082 European ancestry controls	46,785 European ancestry cases, 42,892 European ancestry controls, 14,068 East Asian ancestry cases, 13,104 East Asian ancestry controls	19q13.31	19	43782361	y	KCCN4, LYPD5	KCNN4 - LOC107987268	3783	107987268		222	1931	rs3760982-A	rs3760982	0	3760982	intergenic_variant	1	0.46	1e-16	16	(EA)	1.05	[1.03-1.07] (Oncoarray)	Illumina [~ 11800000] (imputed)	N
2017-11-14	25751625	Michailidou K	2015-04-01	Nat Genet	www.ncbi.nlm.nih.gov/pubmed/25751625	Genome-wide association analysis of more than 120,000 individuals identifies 15 new susceptibility loci for breast cancer.	Breast cancer	15,748 European ancestry cases, 18,084 European ancestry controls	46,785 European ancestry cases, 42,892 European ancestry controls	19q13.31	19	43782361	y	NR	KCNN4 - LOC107987268	3783	107987268		222	1931	rs3760982-A	rs3760982	0	3760982	intergenic_variant	1	0.46	8e-09	8.09691		1.05	[1.03-1.07]	Affymetrix, Illumina [~ 11600000] (imputed)	N
2017-12-19	29058716	Milne RL	2017-10-23	Nat Genet	www.ncbi.nlm.nih.gov/pubmed/29058716	Identification of ten variants associated with risk of estrogen-receptor-negative breast cancer.	Breast cancer (estrogen-receptor negative)	14,135 European ancestry cases, 58,126 European ancestry controls	7,333 European ancestry cases, 42,468 European ancestry controls	19q13.31	19	43782361	y	NR	KCNN4 - LOC107987268	3783	107987268		222	1931	rs3760982-A	rs3760982	0	3760982	intergenic_variant	1	0.46	5e-08	7.30103		1.08	[1.05-1.12] (Oncoarray)	Illumina [~ 11500000] (imputed)	N
2017-11-30	29059683	Michailidou K	2017-10-23	Nature	www.ncbi.nlm.nih.gov/pubmed/29059683	Association analysis identifies 65 new breast cancer risk loci.	Breast cancer	76,192 European ancestry cases, 63,082 European ancestry controls	46,785 European ancestry cases, 42,892 European ancestry controls, 14,068 East Asian ancestry cases, 13,104 East Asian ancestry controls	18q11.2	18	26576054	y	NR	KCTD1			284252			rs7240205-T	rs7240205	0	7240205	intron_variant	0	0.6096	2e-08	7.69897	(EA)	0.0365	[0.024-0.049] unit decrease	Illumina [~ 11800000] (imputed)	N
2017-12-19	29058716	Milne RL	2017-10-23	Nat Genet	www.ncbi.nlm.nih.gov/pubmed/29058716	Identification of ten variants associated with risk of estrogen-receptor-negative breast cancer.	Breast cancer	14,135 European ancestry ER- cases, 58,126 European ancestry controls, 7,784 European ancestry BRCA1 carrrier cases, 7,782 European ancestry BRCA1 carrrier controls	7,333 European ancestry ER- cases, 42,468 European ancestry controls, 1,630 European ancestry BRCA1 carrrier cases, 1,712 European ancestry BRCA1 carrrier controls	11q22.3	11	108474789	y	KDELC2	KDELC2			143888			rs11374964-G	rs11374964	0	11374964	3_prime_UTR_variant	0	0.58	4e-13	12.3979		1.06383	[1.04-1.09] (BCAC)	Illumina [~ 11500000] (imputed)	N
2017-12-19	29058716	Milne RL	2017-10-23	Nat Genet	www.ncbi.nlm.nih.gov/pubmed/29058716	Identification of ten variants associated with risk of estrogen-receptor-negative breast cancer.	Breast cancer	14,135 European ancestry ER- cases, 58,126 European ancestry controls, 7,784 European ancestry BRCA1 carrrier cases, 7,782 European ancestry BRCA1 carrrier controls	7,333 European ancestry ER- cases, 42,468 European ancestry controls, 1,630 European ancestry BRCA1 carrrier cases, 1,712 European ancestry BRCA1 carrrier controls	11q22.3	11	108486410	y	KDELC2	KDELC2			143888			rs74911261-G	rs74911261	0	74911261	missense_variant	0	0.98	5e-11	10.301		1.22	[1.12-1.33] (BCAC)	Illumina [~ 11500000] (imputed)	N
2017-12-19	29058716	Milne RL	2017-10-23	Nat Genet	www.ncbi.nlm.nih.gov/pubmed/29058716	Identification of ten variants associated with risk of estrogen-receptor-negative breast cancer.	Breast cancer (estrogen-receptor negative)	14,135 European ancestry cases, 58,126 European ancestry controls	7,333 European ancestry cases, 42,468 European ancestry controls	11q22.3	11	108474789	y	KDELC2	KDELC2			143888			rs11374964-G	rs11374964	0	11374964	3_prime_UTR_variant	0	0.58	4e-08	7.39794		1.06383	[1.04-1.09]	Illumina [~ 11500000] (imputed)	N
2017-12-19	29058716	Milne RL	2017-10-23	Nat Genet	www.ncbi.nlm.nih.gov/pubmed/29058716	Identification of ten variants associated with risk of estrogen-receptor-negative breast cancer.	Breast cancer (estrogen-receptor negative)	14,135 European ancestry cases, 58,126 European ancestry controls	7,333 European ancestry cases, 42,468 European ancestry controls	11q22.3	11	108486410	y	KDELC2	KDELC2			143888			rs74911261-G	rs74911261	0	74911261	missense_variant	0	0.98	2e-06	5.69897		1.21951	[1.12-1.33]	Illumina [~ 11500000] (imputed)	N
2017-12-19	29058716	Milne RL	2017-10-23	Nat Genet	www.ncbi.nlm.nih.gov/pubmed/29058716	Identification of ten variants associated with risk of estrogen-receptor-negative breast cancer.	Breast Cancer in BRCA1 mutation carriers	7,784 European ancestry carrier cases, 7,782 European ancestry carrier controls	1,630 European ancestry carrier cases, 1,712 European ancestry carrier controls	11q22.3	11	108486410	y	KDELC2	KDELC2			143888			rs74911261-G	rs74911261	0	74911261	missense_variant	0	0.98	2e-06	5.69897		1.35135	[1.19-1.54]	Illumina [~ 11500000] (imputed)	N
2017-12-19	29058716	Milne RL	2017-10-23	Nat Genet	www.ncbi.nlm.nih.gov/pubmed/29058716	Identification of ten variants associated with risk of estrogen-receptor-negative breast cancer.	Breast Cancer in BRCA1 mutation carriers	7,784 European ancestry carrier cases, 7,782 European ancestry carrier controls	1,630 European ancestry carrier cases, 1,712 European ancestry carrier controls	11q22.3	11	108474789	y	KDELC2	KDELC2			143888			rs11374964-G	rs11374964	0	11374964	3_prime_UTR_variant	0	0.57	1e-06	6		1.0989	[1.05-1.14]	Illumina [~ 11500000] (imputed)	N
2017-11-30	29059683	Michailidou K	2017-10-23	Nature	www.ncbi.nlm.nih.gov/pubmed/29059683	Association analysis identifies 65 new breast cancer risk loci.	Breast cancer	76,192 European ancestry cases, 63,082 European ancestry controls	46,785 European ancestry cases, 42,892 European ancestry controls, 14,068 East Asian ancestry cases, 13,104 East Asian ancestry controls	14q13.2	14	35130485	y	NR	KIAA0391			9692			rs58327846-C	rs58327846	0	58327846	intron_variant	0	0.3512	4e-06	5.39794	(EA)	0.0311	[0.018-0.044] unit decrease	Illumina [~ 11800000] (imputed)	N
2017-11-30	29059683	Michailidou K	2017-10-23	Nature	www.ncbi.nlm.nih.gov/pubmed/29059683	Association analysis identifies 65 new breast cancer risk loci.	Breast cancer	76,192 European ancestry cases, 63,082 European ancestry controls	46,785 European ancestry cases, 42,892 European ancestry controls, 14,068 East Asian ancestry cases, 13,104 East Asian ancestry controls	1q22	1	155928969	y	NR	KIAA0907			22889			rs11406084-CA	rs11406084	0	11406084	intron_variant	0	0.1995	7e-06	5.1549	(EA)	0.0378	[0.021-0.054] unit increase	Illumina [~ 11800000] (imputed)	N
2017-11-30	29059683	Michailidou K	2017-10-23	Nature	www.ncbi.nlm.nih.gov/pubmed/29059683	Association analysis identifies 65 new breast cancer risk loci.	Breast cancer	76,192 European ancestry cases, 63,082 European ancestry controls	46,785 European ancestry cases, 42,892 European ancestry controls, 14,068 East Asian ancestry cases, 13,104 East Asian ancestry controls	22q13.31	22	44323082	y	NR	KIAA1644			85352			rs201681753-CCCAT	rs201681753	0	201681753	intergenic_variant	0	0.0337	3e-06	5.52288	(EA)	0.1129	[0.065-0.16] unit decrease	Illumina [~ 11800000] (imputed)	N
2017-11-30	29059683	Michailidou K	2017-10-23	Nature	www.ncbi.nlm.nih.gov/pubmed/29059683	Association analysis identifies 65 new breast cancer risk loci.	Breast cancer	76,192 European ancestry cases, 63,082 European ancestry controls	46,785 European ancestry cases, 42,892 European ancestry controls, 14,068 East Asian ancestry cases, 13,104 East Asian ancestry controls	9p24.1	9	5956008	y	NR	KIAA2026			158358			rs10975370-G	rs10975370	0	10975370	intron_variant	0	0.2043	3e-06	5.52288	(EA)	0.0356	[0.021-0.05] unit increase	Illumina [~ 11800000] (imputed)	N
2017-11-30	29059683	Michailidou K	2017-10-23	Nature	www.ncbi.nlm.nih.gov/pubmed/29059683	Association analysis identifies 65 new breast cancer risk loci.	Breast cancer	76,192 European ancestry cases, 63,082 European ancestry controls	46,785 European ancestry cases, 42,892 European ancestry controls, 14,068 East Asian ancestry cases, 13,104 East Asian ancestry controls	3p21.31	3	47241865	y	NR	KIF9, KIF9-AS1			64147, 285352			rs9867461-T	rs9867461	0	9867461	intron_variant	0	0.0312	2e-06	5.69897	(EA)	0.0964	[0.057-0.136] unit decrease	Illumina [~ 11800000] (imputed)	N
2017-11-30	29059683	Michailidou K	2017-10-23	Nature	www.ncbi.nlm.nih.gov/pubmed/29059683	Association analysis identifies 65 new breast cancer risk loci.	Breast cancer	76,192 European ancestry cases, 63,082 European ancestry controls	46,785 European ancestry cases, 42,892 European ancestry controls, 14,068 East Asian ancestry cases, 13,104 East Asian ancestry controls	3p21.31	3	47364189	y	NR	KLHL18 - PTPN23	23276	25930		17373	16793	rs146331761-A	rs146331761	0	146331761	intergenic_variant	1	0.0367	5e-07	6.30103	(EA)	0.0875	[0.053-0.122] unit decrease	Illumina [~ 11800000] (imputed)	N
2017-11-30	29059683	Michailidou K	2017-10-23	Nature	www.ncbi.nlm.nih.gov/pubmed/29059683	Association analysis identifies 65 new breast cancer risk loci.	Breast cancer	76,192 European ancestry cases, 63,082 European ancestry controls	46,785 European ancestry cases, 42,892 European ancestry controls, 14,068 East Asian ancestry cases, 13,104 East Asian ancestry controls	7q21.2	7	92243559	y	NR	KRIT1			889			rs35522438-AT	rs35522438	0	35522438	intron_variant	0	0.3913	1e-09	9	(EA)	0.0389	[0.026-0.051] unit increase	Illumina [~ 11800000] (imputed)	N
2017-11-30	29059683	Michailidou K	2017-10-23	Nature	www.ncbi.nlm.nih.gov/pubmed/29059683	Association analysis identifies 65 new breast cancer risk loci.	Breast cancer	76,192 European ancestry cases, 63,082 European ancestry controls	46,785 European ancestry cases, 42,892 European ancestry controls, 14,068 East Asian ancestry cases, 13,104 East Asian ancestry controls	5q35.1	5	170164483	y	intergenic	KRT18P41 - LINC01187	345430	100507267		22537	27164	rs4562056-G	rs4562056	0	4562056	intergenic_variant	1	0.33	5e-10	9.30103	(EA)	1.05	[1.03-1.07] (Oncoarray)	Illumina [~ 11800000] (imputed)	N
2017-12-19	29058716	Milne RL	2017-10-23	Nat Genet	www.ncbi.nlm.nih.gov/pubmed/29058716	Identification of ten variants associated with risk of estrogen-receptor-negative breast cancer.	Breast cancer	14,135 European ancestry ER- cases, 58,126 European ancestry controls, 7,784 European ancestry BRCA1 carrrier cases, 7,782 European ancestry BRCA1 carrrier controls	7,333 European ancestry ER- cases, 42,468 European ancestry controls, 1,630 European ancestry BRCA1 carrrier cases, 1,712 European ancestry BRCA1 carrrier controls	6q23.1	6	130027974	y	L3MBTL3	L3MBTL3			84456			rs6569648-T	rs6569648	0	6569648	intron_variant	0	0.77	8e-10	9.09691		1.07527	[1.05-1.11] (BCAC)	Illumina [~ 11500000] (imputed)	N
2017-11-30	29059683	Michailidou K	2017-10-23	Nature	www.ncbi.nlm.nih.gov/pubmed/29059683	Association analysis identifies 65 new breast cancer risk loci.	Breast cancer	76,192 European ancestry cases, 63,082 European ancestry controls	46,785 European ancestry cases, 42,892 European ancestry controls, 14,068 East Asian ancestry cases, 13,104 East Asian ancestry controls	6q23.1	6	130027974	y	L3MBTL3	L3MBTL3			84456			rs6569648-C	rs6569648	0	6569648	intron_variant	0	0.76	3e-12	11.5229	(EA)	1.06383	[1.04-1.09] (Oncoarray)	Illumina [~ 11800000] (imputed)	N
2017-12-19	29058716	Milne RL	2017-10-23	Nat Genet	www.ncbi.nlm.nih.gov/pubmed/29058716	Identification of ten variants associated with risk of estrogen-receptor-negative breast cancer.	Breast cancer (estrogen-receptor negative)	14,135 European ancestry cases, 58,126 European ancestry controls	7,333 European ancestry cases, 42,468 European ancestry controls	6q23.1	6	130027974	y	L3MBTL3	L3MBTL3			84456			rs6569648-T	rs6569648	0	6569648	intron_variant	0	0.77	4e-08	7.39794		1.07527	[1.05-1.11]	Illumina [~ 11500000] (imputed)	N
2017-11-30	29059683	Michailidou K	2017-10-23	Nature	www.ncbi.nlm.nih.gov/pubmed/29059683	Association analysis identifies 65 new breast cancer risk loci.	Breast cancer	76,192 European ancestry cases, 63,082 European ancestry controls	46,785 European ancestry cases, 42,892 European ancestry controls, 14,068 East Asian ancestry cases, 13,104 East Asian ancestry controls	3p21.31	3	49129027	y	NR	LAMB2			3913			rs61729152-T	rs61729152	0	61729152	missense_variant	0	0.0203	6e-06	5.22185	(EA)	0.1081	[0.061-0.155] unit decrease	Illumina [~ 11800000] (imputed)	N
2017-11-30	29059683	Michailidou K	2017-10-23	Nature	www.ncbi.nlm.nih.gov/pubmed/29059683	Association analysis identifies 65 new breast cancer risk loci.	Breast cancer	76,192 European ancestry cases, 63,082 European ancestry controls	46,785 European ancestry cases, 42,892 European ancestry controls, 14,068 East Asian ancestry cases, 13,104 East Asian ancestry controls	3q25.31	3	156927968	y	NR	LEKR1			389170			rs7637701-A	rs7637701	0	7637701	intron_variant	0	0.5108	1e-06	6	(EA)	0.03	[0.018-0.042] unit increase	Illumina [~ 11800000] (imputed)	N
2017-03-31	27117709	Couch FJ	2016-04-27	Nat Commun	www.ncbi.nlm.nih.gov/pubmed/27117709	Identification of four novel susceptibility loci for oestrogen receptor negative breast cancer.	Breast cancer	4,939 European ancestry estrogen receptor-negative cases, 14,352 European ancestry controls	7,333 European ancestry estrogen receptor-negative cases, 7,797 European ancestry BRCA1 mutation carrier cases, 7,455 European ancestry BRCA1 mutation carrier controls, 42,468 European ancestry controls	1q32.1	1	202209914	y	LGR6	LGR6			59352			rs17489300-?	rs17489300	0	17489300	intron_variant	0	0.61	2e-08	7.69897		1.03093	[0.99-1.08] (BRCA1 carriers)	Illumina [10909381] (imputed)	N
2017-12-19	29058716	Milne RL	2017-10-23	Nat Genet	www.ncbi.nlm.nih.gov/pubmed/29058716	Identification of ten variants associated with risk of estrogen-receptor-negative breast cancer.	Breast cancer (estrogen-receptor negative)	14,135 European ancestry cases, 58,126 European ancestry controls	7,333 European ancestry cases, 42,468 European ancestry controls	1q32.1	1	202218048	y	LGR6	LGR6			59352			rs6678914-G	rs6678914	0	6678914	intron_variant	0	0.59	3e-12	11.5229		1.08696	[1.06-1.11]	Illumina [~ 11500000] (imputed)	N
2017-03-31	27117709	Couch FJ	2016-04-27	Nat Commun	www.ncbi.nlm.nih.gov/pubmed/27117709	Identification of four novel susceptibility loci for oestrogen receptor negative breast cancer.	Breast cancer (estrogen-receptor negative)	4,939 European ancestry cases, 14,352 European ancestry controls	7,333 European ancestry cases, 42,468 European ancestry controls	1q32.1	1	202209914	y	LGR6	LGR6			59352			rs17489300-?	rs17489300	0	17489300	intron_variant	0	0.6	9e-10	9.04576		1.11111	[1.08-1.15]	Illumina [10909381] (imputed)	N
2013-09-12	23535733	Garcia-Closas M	2013-04-01	Nat Genet	www.ncbi.nlm.nih.gov/pubmed/23535733	Genome-wide association studies identify four ER negative-specific breast cancer risk loci.	Breast cancer	4,193 European ancestry cases, 35,194 European ancestry controls	6,514 European ancestry cases, 41,455 European ancestry controls	1q32.1	1	202218048	y	LGR6, UBE2T, PTPN7	LGR6			59352			rs6678914-?	rs6678914	0	6678914	intron_variant	0	0.59	1e-08	8		1.1	[1.06-1.13]	Illumina [NR]	N
2017-11-30	29059683	Michailidou K	2017-10-23	Nature	www.ncbi.nlm.nih.gov/pubmed/29059683	Association analysis identifies 65 new breast cancer risk loci.	Breast cancer	76,192 European ancestry cases, 63,082 European ancestry controls	46,785 European ancestry cases, 42,892 European ancestry controls, 14,068 East Asian ancestry cases, 13,104 East Asian ancestry controls	2p23.3	2	25222417	y	NR	LINC01381 - DNMT3A	106144568	1788		13215	10544	rs113953597-A	rs113953597	0	113953597	intergenic_variant	1	0.2188	1e-08	8	(EA)	0.0446	[0.029-0.06] unit increase	Illumina [~ 11800000] (imputed)	N
2014-10-17	24493630	Ahsan H	2014-02-03	Cancer Epidemiol Biomarkers Prev	www.ncbi.nlm.nih.gov/pubmed/24493630	A genome-wide association study of early-onset breast cancer identifies PFKM as a novel breast cancer gene and supports a common genetic spectrum for breast cancer at any age.	Breast cancer (early onset)	3,523 European ancestry young female cases, 2,702 European ancestry young female controls	3,470 European ancestry young female cases, 5,475 European ancestry young female controls	11q13.3	11	69492927	y	CCND1	LINC01488			101928292			rs537626-?	rs537626	0	537626	non_coding_transcript_exon_variant	0	0.18	2e-15	14.699		1.29	[1.21-1.37]	Illumina [1265548] (imputed)	N
2017-11-30	29059683	Michailidou K	2017-10-23	Nature	www.ncbi.nlm.nih.gov/pubmed/29059683	Association analysis identifies 65 new breast cancer risk loci.	Breast cancer	76,192 European ancestry cases, 63,082 European ancestry controls	46,785 European ancestry cases, 42,892 European ancestry controls, 14,068 East Asian ancestry cases, 13,104 East Asian ancestry controls	11q13.3	11	69564393	y	CCND1	LINC01488 - CCND1	101928292	595		70850	76712	rs75915166-A	rs75915166	0	75915166	intergenic_variant	1	0.06	4e-95	94.3979	(EA)	1.28	[1.24-1.33] (Oncoarray)	Illumina [~ 11800000] (imputed)	N
2017-11-30	29059683	Michailidou K	2017-10-23	Nature	www.ncbi.nlm.nih.gov/pubmed/29059683	Association analysis identifies 65 new breast cancer risk loci.	Breast cancer	76,192 European ancestry cases, 63,082 European ancestry controls	46,785 European ancestry cases, 42,892 European ancestry controls, 14,068 East Asian ancestry cases, 13,104 East Asian ancestry controls	11q13.3	11	69516874	y	CCND1	LINC01488 - CCND1	101928292	595		23331	124231	rs554219-G	rs554219	0	554219	regulatory_region_variant	1	0.13	6e-47	46.2218	(EA)	1.21	[1.18-1.24] (Oncoarray)	Illumina [~ 11800000] (imputed)	N
2014-10-17	24493630	Ahsan H	2014-02-03	Cancer Epidemiol Biomarkers Prev	www.ncbi.nlm.nih.gov/pubmed/24493630	A genome-wide association study of early-onset breast cancer identifies PFKM as a novel breast cancer gene and supports a common genetic spectrum for breast cancer at any age.	Breast cancer (early onset)	3,523 European ancestry young female cases, 2,702 European ancestry young female controls	3,470 European ancestry young female cases, 5,475 European ancestry young female controls	11q13.3	11	69513996	y	CCND1	LINC01488 - CCND1	101928292	595		20453	127109	rs614367-?	rs614367	0	614367	intergenic_variant	1	0.16	1e-08	8		1.34	[NR]	Illumina [1265548] (imputed)	N
2010-06-02	20453838	Turnbull C	2010-05-09	Nat Genet	www.ncbi.nlm.nih.gov/pubmed/20453838	Genome-wide association study identifies five new breast cancer susceptibility loci.	Breast cancer	3,659 European ancestry cases, 4,897 European ancestry controls	12,576 European ancestry cases, 12,223 European ancestry controls	11q13.3	11	69513996	y	FGF3, MYEOV, CCND1, ORAOV1, FGF19, FGF4	LINC01488 - CCND1	101928292	595		20453	127109	rs614367-T	rs614367	0	614367	intergenic_variant	1	0.15	3e-15	14.5229		1.15	[1.10-1.20]	Illumina [582886]	N
2013-09-12	23535729	Michailidou K	2013-04-01	Nat Genet	www.ncbi.nlm.nih.gov/pubmed/23535729	Large-scale genotyping identifies 41 new loci associated with breast cancer risk.	Breast cancer	10,052 European ancestry cases, 12,575 European ancestry controls	45,290 European ancestry cases, 41,880 European ancestry controls	11q13.3	11	69513996	y	intergenic	LINC01488 - CCND1	101928292	595		20453	127109	rs614367-T	rs614367	0	614367	intergenic_variant	1	0.15	2e-63	62.699		1.21	[1.18-1.24]	Affymetrix, Illumina [~ 2600000] (imputed)	N
2017-11-30	29059683	Michailidou K	2017-10-23	Nature	www.ncbi.nlm.nih.gov/pubmed/29059683	Association analysis identifies 65 new breast cancer risk loci.	Breast cancer	76,192 European ancestry cases, 63,082 European ancestry controls	46,785 European ancestry cases, 42,892 European ancestry controls, 14,068 East Asian ancestry cases, 13,104 East Asian ancestry controls	11q13.3	11	69516650	y	NR	LINC01488 - CCND1	101928292	595		23107	124455	rs78540526-T	rs78540526	0	78540526	regulatory_region_variant	1	0.0756	2e-131	130.699	(EA)	0.2758	[0.25-0.3] unit increase	Illumina [~ 11800000] (imputed)	N
2017-11-14	25751625	Michailidou K	2015-04-01	Nat Genet	www.ncbi.nlm.nih.gov/pubmed/25751625	Genome-wide association analysis of more than 120,000 individuals identifies 15 new susceptibility loci for breast cancer.	Breast cancer	15,748 European ancestry cases, 18,084 European ancestry controls	46,785 European ancestry cases, 42,892 European ancestry controls	11q13.3	11	69516650	y	NR	LINC01488 - CCND1	101928292	595		23107	124455	rs78540526-T	rs78540526	0	78540526	regulatory_region_variant	1	0.08	2e-86	85.699		1.34	[1.29-1.38]	Affymetrix, Illumina [~ 11600000] (imputed)	N
2017-11-14	25751625	Michailidou K	2015-04-01	Nat Genet	www.ncbi.nlm.nih.gov/pubmed/25751625	Genome-wide association analysis of more than 120,000 individuals identifies 15 new susceptibility loci for breast cancer.	Breast cancer	15,748 European ancestry cases, 18,084 European ancestry controls	46,785 European ancestry cases, 42,892 European ancestry controls	11q13.3	11	69516874	y	NR	LINC01488 - CCND1	101928292	595		23331	124231	rs554219-G	rs554219	0	554219	regulatory_region_variant	1	0.12	2e-81	80.699		1.26	[1.23-1.3]	Affymetrix, Illumina [~ 11600000] (imputed)	N
2017-11-14	25751625	Michailidou K	2015-04-01	Nat Genet	www.ncbi.nlm.nih.gov/pubmed/25751625	Genome-wide association analysis of more than 120,000 individuals identifies 15 new susceptibility loci for breast cancer.	Breast cancer	15,748 European ancestry cases, 18,084 European ancestry controls	46,785 European ancestry cases, 42,892 European ancestry controls	11q13.3	11	69564393	y	NR	LINC01488 - CCND1	101928292	595		70850	76712	rs75915166-A	rs75915166	0	75915166	intergenic_variant	1	0.06	1e-57	57		1.31	[1.26-1.36]	Affymetrix, Illumina [~ 11600000] (imputed)	N
2017-11-30	29059683	Michailidou K	2017-10-23	Nature	www.ncbi.nlm.nih.gov/pubmed/29059683	Association analysis identifies 65 new breast cancer risk loci.	Breast cancer	76,192 European ancestry cases, 63,082 European ancestry controls	46,785 European ancestry cases, 42,892 European ancestry controls, 14,068 East Asian ancestry cases, 13,104 East Asian ancestry controls	7q32.3	7	130982362	y	FLJ43663	LINC-PINT			378805			rs4593472-C	rs4593472	0	4593472	intron_variant	0	0.65	2e-11	10.699	(EA)	1.03093	[1.01-1.05] (Oncoarray)	Illumina [~ 11800000] (imputed)	N
2017-11-14	25751625	Michailidou K	2015-04-01	Nat Genet	www.ncbi.nlm.nih.gov/pubmed/25751625	Genome-wide association analysis of more than 120,000 individuals identifies 15 new susceptibility loci for breast cancer.	Breast cancer	15,748 European ancestry cases, 18,084 European ancestry controls	46,785 European ancestry cases, 42,892 European ancestry controls	7q32.3	7	130982362	y	FLJ43663	LINC-PINT			378805			rs4593472-C	rs4593472	0	4593472	intron_variant	0	0.65	2e-09	8.69897		1.05263	[1.03-1.06]	Affymetrix, Illumina [~ 11600000] (imputed)	N
2017-11-30	29059683	Michailidou K	2017-10-23	Nature	www.ncbi.nlm.nih.gov/pubmed/29059683	Association analysis identifies 65 new breast cancer risk loci.	Breast cancer	76,192 European ancestry cases, 63,082 European ancestry controls	46,785 European ancestry cases, 42,892 European ancestry controls, 14,068 East Asian ancestry cases, 13,104 East Asian ancestry controls	7q32.3	7	130989722	y	NR	LINC-PINT			378805			rs68056147-A	rs68056147	0	68056147	intron_variant	0	0.299	5e-13	12.301	(EA)	0.0501	[0.037-0.064] unit increase	Illumina [~ 11800000] (imputed)	N
2011-09-30	21908515	Cai Q	2011-09-09	Hum Mol Genet	www.ncbi.nlm.nih.gov/pubmed/21908515	Genome-wide association study identifies breast cancer risk variant at 10q21.2: results from the Asia Breast Cancer Consortium.	Breast cancer	2,062 East Asian ancestry cases, 2,066 East Asian ancestry controls	15,091 East Asian ancestry cases, 14,877 East Asian ancestry controls	7q32.3	7	130969092	y	NR	LINC-PINT			378805			rs2048672-C	rs2048672	0	2048672	intron_variant	0	0.45	6e-06	5.22185		1.11	[1.05-1.17]	Affymetrix [684457]	N
2017-11-30	29059683	Michailidou K	2017-10-23	Nature	www.ncbi.nlm.nih.gov/pubmed/29059683	Association analysis identifies 65 new breast cancer risk loci.	Breast cancer	76,192 European ancestry cases, 63,082 European ancestry controls	46,785 European ancestry cases, 42,892 European ancestry controls, 14,068 East Asian ancestry cases, 13,104 East Asian ancestry controls	9q33.3	9	126634155	y	LMX1B	LMX1B			4010			rs10760444-A	rs10760444	0	10760444	intron_variant	0	0.43	9e-09	8.04576	(EA)	1.03	[1.02-1.05] (Oncoarray)	Illumina [~ 11800000] (imputed)	N
2017-11-30	29059683	Michailidou K	2017-10-23	Nature	www.ncbi.nlm.nih.gov/pubmed/29059683	Association analysis identifies 65 new breast cancer risk loci.	Breast cancer	76,192 European ancestry cases, 63,082 European ancestry controls	46,785 European ancestry cases, 42,892 European ancestry controls, 14,068 East Asian ancestry cases, 13,104 East Asian ancestry controls	2q31.1	2	173348166	y	CDCA7	LOC100289479 - CDCA7	100289479	83879		9705	5851	rs1550623-A	rs1550623	0	1550623	intron_variant	1	0.85	5e-10	9.30103	(EA)	1.05263	[1.02-1.08] (Oncoarray)	Illumina [~ 11800000] (imputed)	N
2013-09-12	23535729	Michailidou K	2013-04-01	Nat Genet	www.ncbi.nlm.nih.gov/pubmed/23535729	Large-scale genotyping identifies 41 new loci associated with breast cancer risk.	Breast cancer	10,052 European ancestry cases, 12,575 European ancestry controls	45,290 European ancestry cases, 41,880 European ancestry controls	2q31.1	2	173348166	y	CDCA7	LOC100289479 - CDCA7	100289479	83879		9705	5851	rs1550623-A	rs1550623	0	1550623	intron_variant	1	0.84	3e-08	7.52288		1.06	[1.03-1.09]	Affymetrix, Illumina [~ 2600000] (imputed)	N
2017-11-30	29059683	Michailidou K	2017-10-23	Nature	www.ncbi.nlm.nih.gov/pubmed/29059683	Association analysis identifies 65 new breast cancer risk loci.	Breast cancer	76,192 European ancestry cases, 63,082 European ancestry controls	46,785 European ancestry cases, 42,892 European ancestry controls, 14,068 East Asian ancestry cases, 13,104 East Asian ancestry controls	2q31.1	2	173340858	y	NR	LOC100289479 - CDCA7	100289479	83879		2397	13159	rs200725404-A	rs200725404	0	200725404	intron_variant	1	0.8437	4e-10	9.39794	(EA)	0.055	[0.038-0.072] unit increase	Illumina [~ 11800000] (imputed)	N
2017-11-14	25751625	Michailidou K	2015-04-01	Nat Genet	www.ncbi.nlm.nih.gov/pubmed/25751625	Genome-wide association analysis of more than 120,000 individuals identifies 15 new susceptibility loci for breast cancer.	Breast cancer	15,748 European ancestry cases, 18,084 European ancestry controls	46,785 European ancestry cases, 42,892 European ancestry controls	2q31.1	2	173348166	y	NR	LOC100289479 - CDCA7	100289479	83879		9705	5851	rs1550623-A	rs1550623	0	1550623	intron_variant	1	0.84	1e-06	6		1.05263	[1.03-1.09]	Affymetrix, Illumina [~ 11600000] (imputed)	N
2017-01-10	27354352	Han MR	2016-06-27	Hum Mol Genet	www.ncbi.nlm.nih.gov/pubmed/27354352	Genome-wide association study in East Asians identifies two novel breast cancer susceptibility loci.	Breast cancer	7,619 East Asian ancestry cases, 6,286 East Asian ancestry controls	6,605 East Asian ancestry cases, 8,543 East Asian ancestry controls	1p22.3	1	87313534	y	LMO4	LOC101927844 - LMO4	101927844	8543		62203	14934	rs12118297-G	rs12118297	0	12118297	intergenic_variant	1	0.62	4e-08	7.39794		1.1	[1.06-1.14]	Affymetrix, Illumina [668499] (imputed)	N
2017-11-30	29059683	Michailidou K	2017-10-23	Nature	www.ncbi.nlm.nih.gov/pubmed/29059683	Association analysis identifies 65 new breast cancer risk loci.	Breast cancer	76,192 European ancestry cases, 63,082 European ancestry controls	46,785 European ancestry cases, 42,892 European ancestry controls, 14,068 East Asian ancestry cases, 13,104 East Asian ancestry controls	2q35	2	217098337	y	IGFBP5	LOC101928278			101928278			rs34005590-C	rs34005590	0	34005590	intergenic_variant	0	0.95	3e-41	40.5229	(EA)	1.21951	[1.16-1.27] (Oncoarray)	Illumina [~ 11800000] (imputed)	N
2017-11-30	29059683	Michailidou K	2017-10-23	Nature	www.ncbi.nlm.nih.gov/pubmed/29059683	Association analysis identifies 65 new breast cancer risk loci.	Breast cancer	76,192 European ancestry cases, 63,082 European ancestry controls	46,785 European ancestry cases, 42,892 European ancestry controls, 14,068 East Asian ancestry cases, 13,104 East Asian ancestry controls	2q35	2	217056046	y	IGFBP5	LOC101928278			101928278			rs4442975-G	rs4442975	0	4442975	intergenic_variant	0	0.5	1e-95	95	(EA)	1.1236	[1.11-1.15] (Oncoarray)	Illumina [~ 11800000] (imputed)	N
2017-11-30	29059683	Michailidou K	2017-10-23	Nature	www.ncbi.nlm.nih.gov/pubmed/29059683	Association analysis identifies 65 new breast cancer risk loci.	Breast cancer	76,192 European ancestry cases, 63,082 European ancestry controls	46,785 European ancestry cases, 42,892 European ancestry controls, 14,068 East Asian ancestry cases, 13,104 East Asian ancestry controls	5q11.2	5	56757896	y	MAP3K1	LOC101928448 - LOC105378979	101928448	105378979		151664	8499	rs62355902-T	rs62355902	0	62355902	intergenic_variant	1	0.16	7e-98	97.1549	(EA)	1.18	[1.15-1.21] (Oncoarray)	Illumina [~ 11800000] (imputed)	N
2008-06-16	17529967	Easton DF	2007-05-27	Nature	www.ncbi.nlm.nih.gov/pubmed/17529967	Genome-wide association study identifies novel breast cancer susceptibility loci.	Breast cancer	390 European ancestry cases, 364 European ancestry controls	4,364 East Asian ancestry cases, 24,174 European ancestry controls, 3,564 East Asian ancestry controls, 24,391 European ancestry controls	5q11.2	5	56736057	y	MAP3K1	LOC101928448 - LOC105378979	101928448	105378979		129825	30338	rs889312-C	rs889312	0	889312	regulatory_region_variant	1	0.28	7e-20	19.1549		1.13	[1.10-1.16]	Perlegen [205586]	N
2009-04-03	19330030	Thomas G	2009-03-29	Nat Genet	www.ncbi.nlm.nih.gov/pubmed/19330030	A multistage genome-wide association study in breast cancer identifies two new risk alleles at 1p11.2 and 14q24.1 (RAD51L1).	Breast cancer	1,145 European ancestry cases, 1,142 European ancestry controls	8,625 European ancestry cases, 9,657 European ancestry controls	5q11.2	5	56727256	y	MAP3K1	LOC101928448 - LOC105378979	101928448	105378979		121024	39139	rs16886165-G	rs16886165	0	16886165	intergenic_variant	1	0.15	5e-07	6.30103		1.23	[1.12-1.35] (Het)	Illumina [528173]	N
2010-06-02	20453838	Turnbull C	2010-05-09	Nat Genet	www.ncbi.nlm.nih.gov/pubmed/20453838	Genome-wide association study identifies five new breast cancer susceptibility loci.	Breast cancer	3,659 European ancestry cases, 4,897 European ancestry controls	12,576 European ancestry cases, 12,223 European ancestry controls	5q11.2	5	56736057	y	MAP3K1	LOC101928448 - LOC105378979	101928448	105378979		129825	30338	rs889312-C	rs889312	0	889312	regulatory_region_variant	1	0.28	5e-09	8.30103		1.22	[1.14-1.30]	Illumina [582886]	N
2013-09-12	23535729	Michailidou K	2013-04-01	Nat Genet	www.ncbi.nlm.nih.gov/pubmed/23535729	Large-scale genotyping identifies 41 new loci associated with breast cancer risk.	Breast cancer	10,052 European ancestry cases, 12,575 European ancestry controls	45,290 European ancestry cases, 41,880 European ancestry controls	5q11.2	5	56736057	y	MAP3K1	LOC101928448 - LOC105378979	101928448	105378979		129825	30338	rs889312-C	rs889312	0	889312	regulatory_region_variant	1	0.28	3e-36	35.5229		1.12	[1.10-1.15]	Affymetrix, Illumina [~ 2600000] (imputed)	N
2014-10-17	24493630	Ahsan H	2014-02-03	Cancer Epidemiol Biomarkers Prev	www.ncbi.nlm.nih.gov/pubmed/24493630	A genome-wide association study of early-onset breast cancer identifies PFKM as a novel breast cancer gene and supports a common genetic spectrum for breast cancer at any age.	Breast cancer (early onset)	3,523 European ancestry young female cases, 2,702 European ancestry young female controls	3,470 European ancestry young female cases, 5,475 European ancestry young female controls	5q11.2	5	56733416	y	MAP3K1	LOC101928448 - LOC105378979	101928448	105378979		127184	32979	rs16886181-?	rs16886181	0	16886181	intergenic_variant	1	0.18	9e-14	13.0458		1.26	[1.18-1.34]	Illumina [1265548] (imputed)	N
2014-10-17	24493630	Ahsan H	2014-02-03	Cancer Epidemiol Biomarkers Prev	www.ncbi.nlm.nih.gov/pubmed/24493630	A genome-wide association study of early-onset breast cancer identifies PFKM as a novel breast cancer gene and supports a common genetic spectrum for breast cancer at any age.	Breast cancer (early onset)	3,523 European ancestry young female cases, 2,702 European ancestry young female controls	3,470 European ancestry young female cases, 5,475 European ancestry young female controls	5q11.2	5	56699208	y	MAP3K1	LOC101928448 - LOC105378979	101928448	105378979		92976	67187	rs16886113-?	rs16886113	0	16886113	intergenic_variant	1	0.08	4e-11	10.3979		1.35	[1.23-1.47]	Illumina [1265548] (imputed)	N
2014-10-17	24493630	Ahsan H	2014-02-03	Cancer Epidemiol Biomarkers Prev	www.ncbi.nlm.nih.gov/pubmed/24493630	A genome-wide association study of early-onset breast cancer identifies PFKM as a novel breast cancer gene and supports a common genetic spectrum for breast cancer at any age.	Breast cancer (early onset)	3,523 European ancestry young female cases, 2,702 European ancestry young female controls	3,470 European ancestry young female cases, 5,475 European ancestry young female controls	5q11.2	5	56688029	y	MAP3K1	LOC101928448 - LOC105378979	101928448	105378979		81797	78366	rs16886034-?	rs16886034	0	16886034	regulatory_region_variant	1	0.08	2e-09	8.69897		1.36	[1.23-1.51]	Illumina [1265548] (imputed)	N
2014-10-17	24493630	Ahsan H	2014-02-03	Cancer Epidemiol Biomarkers Prev	www.ncbi.nlm.nih.gov/pubmed/24493630	A genome-wide association study of early-onset breast cancer identifies PFKM as a novel breast cancer gene and supports a common genetic spectrum for breast cancer at any age.	Breast cancer (early onset)	3,523 European ancestry young female cases, 2,702 European ancestry young female controls	3,470 European ancestry young female cases, 5,475 European ancestry young female controls	5q11.2	5	56736057	y	MAP3K1	LOC101928448 - LOC105378979	101928448	105378979		129825	30338	rs889312-?	rs889312	0	889312	regulatory_region_variant	1	0.29	1e-08	8		1.29	[NR]	Illumina [1265548] (imputed)	N
2017-11-30	29059683	Michailidou K	2017-10-23	Nature	www.ncbi.nlm.nih.gov/pubmed/29059683	Association analysis identifies 65 new breast cancer risk loci.	Breast cancer	76,192 European ancestry cases, 63,082 European ancestry controls	46,785 European ancestry cases, 42,892 European ancestry controls, 14,068 East Asian ancestry cases, 13,104 East Asian ancestry controls	4q34.1	4	174906885	y	NR	LOC101928551 - ADAM29	101928551	11086		30921	11473	rs7697216-C	rs7697216	0	7697216	intron_variant	1	0.8819	2e-26	25.699	(EA)	0.1039	[0.085-0.123] unit increase	Illumina [~ 11800000] (imputed)	N
2017-11-30	29059683	Michailidou K	2017-10-23	Nature	www.ncbi.nlm.nih.gov/pubmed/29059683	Association analysis identifies 65 new breast cancer risk loci.	Breast cancer	76,192 European ancestry cases, 63,082 European ancestry controls	46,785 European ancestry cases, 42,892 European ancestry controls, 14,068 East Asian ancestry cases, 13,104 East Asian ancestry controls	1p34.1	1	46135245	y	PIK3R3, LOC101929626	LOC101929626, PIK3R3			101929626, 8503			rs1707302-A	rs1707302	0	1707302	intron_variant	0	0.66	3e-08	7.52288	(EA)	1.04167	[1.02-1.05] (Oncoarray)	Illumina [~ 11800000] (imputed)	N
2017-11-30	29059683	Michailidou K	2017-10-23	Nature	www.ncbi.nlm.nih.gov/pubmed/29059683	Association analysis identifies 65 new breast cancer risk loci.	Breast cancer	76,192 European ancestry cases, 63,082 European ancestry controls	46,785 European ancestry cases, 42,892 European ancestry controls, 14,068 East Asian ancestry cases, 13,104 East Asian ancestry controls	5p12	5	44706396	y	FGF10, MRPS30	LOC102723839 - RN7SL383P	102723839	106479363		196114	9797	rs10941679-G	rs10941679	0	10941679	intergenic_variant	1	0.25	6e-73	72.2218		1.15	[1.13-1.18] (Oncoarray)	Illumina [~ 11800000] (imputed)	N
2017-11-30	29059683	Michailidou K	2017-10-23	Nature	www.ncbi.nlm.nih.gov/pubmed/29059683	Association analysis identifies 65 new breast cancer risk loci.	Breast cancer	76,192 European ancestry cases, 63,082 European ancestry controls	46,785 European ancestry cases, 42,892 European ancestry controls, 14,068 East Asian ancestry cases, 13,104 East Asian ancestry controls	12q24.21	12	115398717	y	TBX3	LOC105370003			105370003			rs1292011-A	rs1292011	0	1292011	regulatory_region_variant	0	0.58	4e-39	38.3979		1.08696	[1.06-1.11] (Oncoarray)	Illumina [~ 11800000] (imputed)	N
2014-04-02	24080446	Rudolph A	2013-11-04	Endocr Relat Cancer	www.ncbi.nlm.nih.gov/pubmed/24080446	Genetic modifiers of menopausal hormone replacement therapy and breast cancer risk: a genome-wide interaction study.	Breast cancer (menopausal hormone therapy interaction)	2,920 European ancestry cases	7,689 European ancestry cases, 9,266 European ancestry controls	13q12.3	13	28590646	y	POMP	LOC105370135 - EIF4A1P7	105370135	341784		6269	8171	rs9579199-?	rs9579199	0	9579199	intergenic_variant	1		8e-06	5.09691		1.2048	[1.11-1.32]	Illumina [2500000] (imputed)	N
2017-11-30	29059683	Michailidou K	2017-10-23	Nature	www.ncbi.nlm.nih.gov/pubmed/29059683	Association analysis identifies 65 new breast cancer risk loci.	Breast cancer	76,192 European ancestry cases, 63,082 European ancestry controls	46,785 European ancestry cases, 42,892 European ancestry controls, 14,068 East Asian ancestry cases, 13,104 East Asian ancestry controls	13q14.11	13	42941618	y	NR	LOC105370178, EPSTI1			105370178, 94240			rs11383827-GA	rs11383827	0	11383827	intron_variant	0	0.228	4e-06	5.39794	(EA)	0.0372	[0.022-0.053] unit decrease	Illumina [~ 11800000] (imputed)	N
2012-10-13	22923054	Chen F	2012-08-25	Hum Genet	www.ncbi.nlm.nih.gov/pubmed/22923054	A genome-wide association study of breast cancer in women of African ancestry.	Breast cancer	3,016 African American cases, 2,745 African American controls	3,533 African ancestry cases, 11,046 African ancestry controls	14q31.3	14	87829256	y	GALC	LOC105370611 - GALC	105370611	2581		173962	103758	rs4322600-G	rs4322600	0	4322600	intron_variant	1	0.78	4e-06	5.39794		1.18	[1.10-1.27]	Illumina [2067098] (imputed)	N
2017-12-19	29058716	Milne RL	2017-10-23	Nat Genet	www.ncbi.nlm.nih.gov/pubmed/29058716	Identification of ten variants associated with risk of estrogen-receptor-negative breast cancer.	Breast cancer	14,135 European ancestry ER- cases, 58,126 European ancestry controls, 7,784 European ancestry BRCA1 carrrier cases, 7,782 European ancestry BRCA1 carrrier controls	7,333 European ancestry ER- cases, 42,468 European ancestry controls, 1,630 European ancestry BRCA1 carrrier cases, 1,712 European ancestry BRCA1 carrrier controls	18q12.1	18	27821241	y	CDH2	LOC105372042 - CDH2	105372042	1000		15974	111637	rs36194942-A	rs36194942	0	36194942	intergenic_variant	1	0.7	1e-08	8		1.06383	[1.04-1.1] (BCAC)	Illumina [~ 11500000] (imputed)	N
2017-12-19	29058716	Milne RL	2017-10-23	Nat Genet	www.ncbi.nlm.nih.gov/pubmed/29058716	Identification of ten variants associated with risk of estrogen-receptor-negative breast cancer.	Breast cancer (estrogen-receptor negative)	14,135 European ancestry cases, 58,126 European ancestry controls	7,333 European ancestry cases, 42,468 European ancestry controls	18q12.1	18	27821241	y	CDH2	LOC105372042 - CDH2	105372042	1000		15974	111637	rs36194942-A	rs36194942	0	36194942	intergenic_variant	1	0.7	3e-07	6.52288		1.06383	[1.04-1.1]	Illumina [~ 11500000] (imputed)	N
2017-11-30	29059683	Michailidou K	2017-10-23	Nature	www.ncbi.nlm.nih.gov/pubmed/29059683	Association analysis identifies 65 new breast cancer risk loci.	Breast cancer	76,192 European ancestry cases, 63,082 European ancestry controls	46,785 European ancestry cases, 42,892 European ancestry controls, 14,068 East Asian ancestry cases, 13,104 East Asian ancestry controls	18q12.1	18	27826891	y	NR	LOC105372042 - CDH2	105372042	1000		21624	105987	rs9959491-T	rs9959491	0	9959491	intergenic_variant	1	0.7115	5e-07	6.30103	(EA)	0.0345	[0.021-0.048] unit increase	Illumina [~ 11800000] (imputed)	N
2017-03-31	27117709	Couch FJ	2016-04-27	Nat Commun	www.ncbi.nlm.nih.gov/pubmed/27117709	Identification of four novel susceptibility loci for oestrogen receptor negative breast cancer.	Breast cancer	4,939 European ancestry estrogen receptor-negative cases, 14,352 European ancestry controls	7,333 European ancestry estrogen receptor-negative cases, 7,797 European ancestry BRCA1 mutation carrier cases, 7,455 European ancestry BRCA1 mutation carrier controls, 42,468 European ancestry controls	2q14.2	2	120330606	y	INHBB	LOC105373584 - LOC105373989	105373584	105373989		11282	11844	rs11903787-?	rs11903787	0	11903787	intergenic_variant	1	0.74	7e-10	9.1549		1.0989	[1.04-1.15] (BRCA1 carriers)	Illumina [10909381] (imputed)	N
2017-03-31	27117709	Couch FJ	2016-04-27	Nat Commun	www.ncbi.nlm.nih.gov/pubmed/27117709	Identification of four novel susceptibility loci for oestrogen receptor negative breast cancer.	Breast cancer (estrogen-receptor negative)	4,939 European ancestry cases, 14,352 European ancestry controls	7,333 European ancestry cases, 42,468 European ancestry controls	2q14.2	2	120330606	y	INHBB	LOC105373584 - LOC105373989	105373584	105373989		11282	11844	rs11903787-?	rs11903787	0	11903787	intergenic_variant	1	0.75	9e-07	6.04576		1.11111	[1.06-1.16]	Illumina [10909381] (imputed)	N
2017-12-19	29058716	Milne RL	2017-10-23	Nat Genet	www.ncbi.nlm.nih.gov/pubmed/29058716	Identification of ten variants associated with risk of estrogen-receptor-negative breast cancer.	Breast cancer	14,135 European ancestry ER- cases, 58,126 European ancestry controls, 7,784 European ancestry BRCA1 carrrier cases, 7,782 European ancestry BRCA1 carrrier controls	7,333 European ancestry ER- cases, 42,468 European ancestry controls, 1,630 European ancestry BRCA1 carrrier cases, 1,712 European ancestry BRCA1 carrrier controls	8q24.13	8	123745421	y	ANXA13	LOC105375739			105375739			rs17350191-T	rs17350191	0	17350191	intergenic_variant	0	0.34	2e-11	10.699		1.07	[1.04-1.09] (BCAC)	Illumina [~ 11500000] (imputed)	N
2017-12-19	29058716	Milne RL	2017-10-23	Nat Genet	www.ncbi.nlm.nih.gov/pubmed/29058716	Identification of ten variants associated with risk of estrogen-receptor-negative breast cancer.	Breast cancer (estrogen-receptor negative)	14,135 European ancestry cases, 58,126 European ancestry controls	7,333 European ancestry cases, 42,468 European ancestry controls	8q24.13	8	123745421	y	ANXA13	LOC105375739			105375739			rs17350191-T	rs17350191	0	17350191	intergenic_variant	0	0.34	2e-08	7.69897		1.07	[1.04-1.09]	Illumina [~ 11500000] (imputed)	N
2017-11-30	29059683	Michailidou K	2017-10-23	Nature	www.ncbi.nlm.nih.gov/pubmed/29059683	Association analysis identifies 65 new breast cancer risk loci.	Breast cancer	76,192 European ancestry cases, 63,082 European ancestry controls	46,785 European ancestry cases, 42,892 European ancestry controls, 14,068 East Asian ancestry cases, 13,104 East Asian ancestry controls	8q24.13	8	123726378	y	NR	LOC105375739, ANXA13			105375739, 312			rs970821-T	rs970821	0	970821	intron_variant	0	0.401	2e-12	11.699	(EA)	0.0445	[0.032-0.057] unit increase	Illumina [~ 11800000] (imputed)	N
2015-04-19	21263130	Fletcher O	2011-01-24	J Natl Cancer Inst	www.ncbi.nlm.nih.gov/pubmed/21263130	Novel breast cancer susceptibility locus at 9q31.2: results of a genome-wide association study.	Breast cancer	2,839 European ancestry cases, 3,507 European ancestry controls	9,041 European ancestry cases, 8,980 European ancestry controls	9q31.2	9	108126198	y	KLF4, ACTL7A, RAD23B	LOC105376214			105376214			rs865686-T	rs865686	0	865686	intergenic_variant	0	0.61	2e-10	9.69897		1.12	[1.09-1.18]	Illumina [~ 296114]	N
2015-09-22	25526632	Rafiq S	2014-12-19	PLoS One	www.ncbi.nlm.nih.gov/pubmed/25526632	A genome wide meta-analysis study for identification of common variation associated with breast cancer prognosis.	Breast cancer (survival)	1,341 European ancestry cases	1,523 European ancestry cases	10p14	10	11806793	y	C10orf47, ECHDC3	LOC105376415 - PROSER2	105376415	254427		21461	16548	rs12358475-?	rs12358475	0	12358475	intergenic_variant	1	NR	2e-06	5.69897		1.33	[1.19-1.49]	Illumina [6500000] (imputed)	N
2017-11-30	29059683	Michailidou K	2017-10-23	Nature	www.ncbi.nlm.nih.gov/pubmed/29059683	Association analysis identifies 65 new breast cancer risk loci.	Breast cancer	76,192 European ancestry cases, 63,082 European ancestry controls	46,785 European ancestry cases, 42,892 European ancestry controls, 14,068 East Asian ancestry cases, 13,104 East Asian ancestry controls	10q24.32	10	102125800	y	NR	LOC105378459 - PPRC1	105378459	23082		2258	7194	rs10883710-C	rs10883710	0	10883710	intergenic_variant	1	0.4601	3e-06	5.52288	(EA)	0.0291	[0.017-0.041] unit decrease	Illumina [~ 11800000] (imputed)	N
2014-10-17	24493630	Ahsan H	2014-02-03	Cancer Epidemiol Biomarkers Prev	www.ncbi.nlm.nih.gov/pubmed/24493630	A genome-wide association study of early-onset breast cancer identifies PFKM as a novel breast cancer gene and supports a common genetic spectrum for breast cancer at any age.	Breast cancer (early onset)	3,523 European ancestry young female cases, 2,702 European ancestry young female controls	3,470 European ancestry young female cases, 5,475 European ancestry young female controls	5q11.2	5	56899963	y	MAP3K1	LOC105378980			105378980			rs12655019-?	rs12655019	0	12655019	intergenic_variant	0	0.1	3e-10	9.52288		1.27	[1.18-1.37]	Illumina [1265548] (imputed)	N
2008-10-14	18463975	Kibriya MG	2008-05-08	Breast Cancer Res Treat	www.ncbi.nlm.nih.gov/pubmed/18463975	A pilot genome-wide association study of early-onset breast cancer.	Breast cancer	26 European ancestry cases, 3 Hispanic cases, 1 African American case, 26 European ancestry controls, 3 Hispanic controls, 1 African American control	NA	16q23.1	16	74438798	y	GLG1	LOC107984827 - GLG1	107984827	2734		3372	8629	3-SNP haplotype 1	rs10871290	0	10871290	intergenic_variant	1	0.34	4e-07	6.39794				Affymetrix [200220]	N
2017-01-10	27354352	Han MR	2016-06-27	Hum Mol Genet	www.ncbi.nlm.nih.gov/pubmed/27354352	Genome-wide association study in East Asians identifies two novel breast cancer susceptibility loci.	Breast cancer	7,619 East Asian ancestry cases, 6,286 East Asian ancestry controls	6,605 East Asian ancestry cases, 8,543 East Asian ancestry controls	21q22.12	21	34738904	y	LINC00160	LOC107985515			107985515			rs16992204-C	rs16992204	0	16992204	intergenic_variant	0	0.12	5e-08	7.30103		1.13	[1.07-1.18]	Affymetrix, Illumina [668499] (imputed)	N
2017-11-30	29059683	Michailidou K	2017-10-23	Nature	www.ncbi.nlm.nih.gov/pubmed/29059683	Association analysis identifies 65 new breast cancer risk loci.	Breast cancer	76,192 European ancestry cases, 63,082 European ancestry controls	46,785 European ancestry cases, 42,892 European ancestry controls, 14,068 East Asian ancestry cases, 13,104 East Asian ancestry controls	6q26	6	160665585	y	NR	LPA			4018			rs72314471-C	rs72314471	0	72314471	intergenic_variant	0	0.8389	8e-06	5.09691	(EA)	0.0385	[0.022-0.055] unit decrease	Illumina [~ 11800000] (imputed)	N
2017-11-30	29059683	Michailidou K	2017-10-23	Nature	www.ncbi.nlm.nih.gov/pubmed/29059683	Association analysis identifies 65 new breast cancer risk loci.	Breast cancer	76,192 European ancestry cases, 63,082 European ancestry controls	46,785 European ancestry cases, 42,892 European ancestry controls, 14,068 East Asian ancestry cases, 13,104 East Asian ancestry controls	17q21.31	17	46277538	y	NR	LRRC37A, ARL17B			9884, 100506084			rs2732699-C	rs2732699	0	2732699	intron_variant	0	0.8401	1e-10	10	(EA)	0.0595	[0.041-0.078] unit increase	Illumina [~ 11800000] (imputed)	N
2017-11-30	29059683	Michailidou K	2017-10-23	Nature	www.ncbi.nlm.nih.gov/pubmed/29059683	Association analysis identifies 65 new breast cancer risk loci.	Breast cancer	76,192 European ancestry cases, 63,082 European ancestry controls	46,785 European ancestry cases, 42,892 European ancestry controls, 14,068 East Asian ancestry cases, 13,104 East Asian ancestry controls	11p15.5	11	1887776	y	LSP1	LSP1			4046			rs3817198-C	rs3817198	0	3817198	intron_variant	0	0.32	1e-18	18	(EA)	1.05	[1.03-1.07] (Oncoarray)	Illumina [~ 11800000] (imputed)	N
2008-06-16	17529967	Easton DF	2007-05-27	Nature	www.ncbi.nlm.nih.gov/pubmed/17529967	Genome-wide association study identifies novel breast cancer susceptibility loci.	Breast cancer	390 European ancestry cases, 364 European ancestry controls	4,364 East Asian ancestry cases, 24,174 European ancestry controls, 3,564 East Asian ancestry controls, 24,391 European ancestry controls	11p15.5	11	1887776	y	LSP1	LSP1			4046			rs3817198-C	rs3817198	0	3817198	intron_variant	0	0.3	3e-09	8.52288		1.07	[1.04-1.11]	Perlegen [205586]	N
2013-09-12	23535729	Michailidou K	2013-04-01	Nat Genet	www.ncbi.nlm.nih.gov/pubmed/23535729	Large-scale genotyping identifies 41 new loci associated with breast cancer risk.	Breast cancer	10,052 European ancestry cases, 12,575 European ancestry controls	45,290 European ancestry cases, 41,880 European ancestry controls	11p15.5	11	1887776	y	LSP1	LSP1			4046			rs3817198-C	rs3817198	0	3817198	intron_variant	0	0.31	2e-11	10.699		1.07	[1.05-1.09]	Affymetrix, Illumina [~ 2600000] (imputed)	N
2017-03-31	27117709	Couch FJ	2016-04-27	Nat Commun	www.ncbi.nlm.nih.gov/pubmed/27117709	Identification of four novel susceptibility loci for oestrogen receptor negative breast cancer.	Breast cancer	4,939 European ancestry estrogen receptor-negative cases, 14,352 European ancestry controls	7,333 European ancestry estrogen receptor-negative cases, 7,797 European ancestry BRCA1 mutation carrier cases, 7,455 European ancestry BRCA1 mutation carrier controls, 42,468 European ancestry controls	11p15.5	11	1880867	y	LSP1	LSP1			4046			rs4980383-?	rs4980383	0	4980383	non_coding_transcript_exon_variant	0	0.45	9e-09	8.04576		1.07	[1.03-1.11] (BRCA1 carriers)	Illumina [10909381] (imputed)	N
2017-03-31	27117709	Couch FJ	2016-04-27	Nat Commun	www.ncbi.nlm.nih.gov/pubmed/27117709	Identification of four novel susceptibility loci for oestrogen receptor negative breast cancer.	Breast cancer (estrogen-receptor negative)	4,939 European ancestry cases, 14,352 European ancestry controls	7,333 European ancestry cases, 42,468 European ancestry controls	11p15.5	11	1880867	y	LSP1	LSP1			4046			rs4980383-?	rs4980383	0	4980383	non_coding_transcript_exon_variant	0	0.44	3e-06	5.52288		1.08	[1.05-1.12]	Illumina [10909381] (imputed)	N
2017-11-30	29059683	Michailidou K	2017-10-23	Nature	www.ncbi.nlm.nih.gov/pubmed/29059683	Association analysis identifies 65 new breast cancer risk loci.	Breast cancer	76,192 European ancestry cases, 63,082 European ancestry controls	46,785 European ancestry cases, 42,892 European ancestry controls, 14,068 East Asian ancestry cases, 13,104 East Asian ancestry controls	11p15.5	11	1877434	y	NR	LSP1			4046			rs1973765-C	rs1973765	0	1973765	intron_variant	0	0.4001	1e-37	37	(EA)	0.0817	[0.069-0.094] unit decrease	Illumina [~ 11800000] (imputed)	N
2017-11-14	25751625	Michailidou K	2015-04-01	Nat Genet	www.ncbi.nlm.nih.gov/pubmed/25751625	Genome-wide association analysis of more than 120,000 individuals identifies 15 new susceptibility loci for breast cancer.	Breast cancer	15,748 European ancestry cases, 18,084 European ancestry controls	46,785 European ancestry cases, 42,892 European ancestry controls	11p15.5	11	1887776	y	NR	LSP1			4046			rs3817198-C	rs3817198	0	3817198	intron_variant	0	0.31	2e-13	12.699		1.07	[1.05-1.09]	Affymetrix, Illumina [~ 11600000] (imputed)	N
2017-11-30	29059683	Michailidou K	2017-10-23	Nature	www.ncbi.nlm.nih.gov/pubmed/29059683	Association analysis identifies 65 new breast cancer risk loci.	Breast cancer	76,192 European ancestry cases, 63,082 European ancestry controls	46,785 European ancestry cases, 42,892 European ancestry controls, 14,068 East Asian ancestry cases, 13,104 East Asian ancestry controls	11p11.2	11	47325389	y	NR	MADD			8567			rs11039183-A	rs11039183	0	11039183	intron_variant	0	0.3501	6e-06	5.22185	(EA)	0.0301	[0.017-0.043] unit decrease	Illumina [~ 11800000] (imputed)	N
2017-11-30	29059683	Michailidou K	2017-10-23	Nature	www.ncbi.nlm.nih.gov/pubmed/29059683	Association analysis identifies 65 new breast cancer risk loci.	Breast cancer	76,192 European ancestry cases, 63,082 European ancestry controls	46,785 European ancestry cases, 42,892 European ancestry controls, 14,068 East Asian ancestry cases, 13,104 East Asian ancestry controls	1p13.2	1	113630788	y	NR	MAGI3			260425			rs1230666-G	rs1230666	0	1230666	intron_variant	0	0.8721	4e-10	9.39794	(EA)	0.0592	[0.041-0.078] unit decrease	Illumina [~ 11800000] (imputed)	N
2014-10-17	24493630	Ahsan H	2014-02-03	Cancer Epidemiol Biomarkers Prev	www.ncbi.nlm.nih.gov/pubmed/24493630	A genome-wide association study of early-onset breast cancer identifies PFKM as a novel breast cancer gene and supports a common genetic spectrum for breast cancer at any age.	Breast cancer (early onset)	3,523 European ancestry young female cases, 2,702 European ancestry young female controls	3,470 European ancestry young female cases, 5,475 European ancestry young female controls	5q11.2	5	56872885	y	MAP3K1	MAP3K1			4214			rs2229882-?	rs2229882	0	2229882	synonymous_variant	0	0.06	1e-14	14		1.45	[1.32-1.60]	Illumina [1265548] (imputed)	N
2014-10-17	24493630	Ahsan H	2014-02-03	Cancer Epidemiol Biomarkers Prev	www.ncbi.nlm.nih.gov/pubmed/24493630	A genome-wide association study of early-onset breast cancer identifies PFKM as a novel breast cancer gene and supports a common genetic spectrum for breast cancer at any age.	Breast cancer (early onset)	3,523 European ancestry young female cases, 2,702 European ancestry young female controls	3,470 European ancestry young female cases, 5,475 European ancestry young female controls	5q11.2	5	56874986	y	MAP3K1	MAP3K1			4214			rs16886448-?	rs16886448	0	16886448	intron_variant	0	0.07	2e-12	11.699		1.37	[1.25-1.49]	Illumina [1265548] (imputed)	N
2014-10-17	24493630	Ahsan H	2014-02-03	Cancer Epidemiol Biomarkers Prev	www.ncbi.nlm.nih.gov/pubmed/24493630	A genome-wide association study of early-onset breast cancer identifies PFKM as a novel breast cancer gene and supports a common genetic spectrum for breast cancer at any age.	Breast cancer (early onset)	3,523 European ancestry young female cases, 2,702 European ancestry young female controls	3,470 European ancestry young female cases, 5,475 European ancestry young female controls	5q11.2	5	56838449	y	MAP3K1	MAP3K1			4214			rs16886397-?	rs16886397	0	16886397	intron_variant	0	0.07	4e-12	11.3979		1.36	[1.25-1.49]	Illumina [1265548] (imputed)	N
2014-10-17	24493630	Ahsan H	2014-02-03	Cancer Epidemiol Biomarkers Prev	www.ncbi.nlm.nih.gov/pubmed/24493630	A genome-wide association study of early-onset breast cancer identifies PFKM as a novel breast cancer gene and supports a common genetic spectrum for breast cancer at any age.	Breast cancer (early onset)	3,523 European ancestry young female cases, 2,702 European ancestry young female controls	3,470 European ancestry young female cases, 5,475 European ancestry young female controls	5q11.2	5	56882284	y	MAP3K1	MAP3K1			4214			rs3822625-?	rs3822625	0	3822625	synonymous_variant	0	0.07	5e-12	11.301		1.36	[1.24-1.48]	Illumina [1265548] (imputed)	N
2014-10-17	24493630	Ahsan H	2014-02-03	Cancer Epidemiol Biomarkers Prev	www.ncbi.nlm.nih.gov/pubmed/24493630	A genome-wide association study of early-onset breast cancer identifies PFKM as a novel breast cancer gene and supports a common genetic spectrum for breast cancer at any age.	Breast cancer (early onset)	3,523 European ancestry young female cases, 2,702 European ancestry young female controls	3,470 European ancestry young female cases, 5,475 European ancestry young female controls	5q11.2	5	56826517	y	MAP3K1	MAP3K1			4214			rs16886364-?	rs16886364	0	16886364	intron_variant	0	0.07	5e-12	11.301		1.36	[1.25-1.48]	Illumina [1265548] (imputed)	N
2014-10-17	24493630	Ahsan H	2014-02-03	Cancer Epidemiol Biomarkers Prev	www.ncbi.nlm.nih.gov/pubmed/24493630	A genome-wide association study of early-onset breast cancer identifies PFKM as a novel breast cancer gene and supports a common genetic spectrum for breast cancer at any age.	Breast cancer (early onset)	3,523 European ancestry young female cases, 2,702 European ancestry young female controls	3,470 European ancestry young female cases, 5,475 European ancestry young female controls	5q11.2	5	56857565	y	MAP3K1	MAP3K1			4214			rs1017226-?	rs1017226	0	1017226	intron_variant	0	0.08	6e-11	10.2218		1.33	[1.22-1.45]	Illumina [1265548] (imputed)	N
2017-11-30	29059683	Michailidou K	2017-10-23	Nature	www.ncbi.nlm.nih.gov/pubmed/29059683	Association analysis identifies 65 new breast cancer risk loci.	Breast cancer	76,192 European ancestry cases, 63,082 European ancestry controls	46,785 European ancestry cases, 42,892 European ancestry controls, 14,068 East Asian ancestry cases, 13,104 East Asian ancestry controls	3p21.31	3	48024338	y	NR	MAP4			4134			rs145407011-T	rs145407011	0	145407011	intron_variant	0	0.0268	1e-06	6	(EA)	0.0978	[0.059-0.137] unit decrease	Illumina [~ 11800000] (imputed)	N
2017-11-30	29059683	Michailidou K	2017-10-23	Nature	www.ncbi.nlm.nih.gov/pubmed/29059683	Association analysis identifies 65 new breast cancer risk loci.	Breast cancer	76,192 European ancestry cases, 63,082 European ancestry controls	46,785 European ancestry cases, 42,892 European ancestry controls, 14,068 East Asian ancestry cases, 13,104 East Asian ancestry controls	4q21.3	4	86302033	y	NR	MAPK10			5602			rs11284646-C	rs11284646	0	11284646	intron_variant	0	0.2932	4e-06	5.39794	(EA)	0.032	[0.018-0.046] unit decrease	Illumina [~ 11800000] (imputed)	N
2017-11-30	29059683	Michailidou K	2017-10-23	Nature	www.ncbi.nlm.nih.gov/pubmed/29059683	Association analysis identifies 65 new breast cancer risk loci.	Breast cancer	76,192 European ancestry cases, 63,082 European ancestry controls	46,785 European ancestry cases, 42,892 European ancestry controls, 14,068 East Asian ancestry cases, 13,104 East Asian ancestry controls	17q21.31	17	45941122	y	NR	MAPT			4137			rs62061734-C	rs62061734	0	62061734	intron_variant	0	0.2103	8e-12	11.0969	(EA)	0.0526	[0.038-0.068] unit decrease	Illumina [~ 11800000] (imputed)	N
2017-11-30	29059683	Michailidou K	2017-10-23	Nature	www.ncbi.nlm.nih.gov/pubmed/29059683	Association analysis identifies 65 new breast cancer risk loci.	Breast cancer	76,192 European ancestry cases, 63,082 European ancestry controls	46,785 European ancestry cases, 42,892 European ancestry controls, 14,068 East Asian ancestry cases, 13,104 East Asian ancestry controls	10q23.33	10	92388574	y	NR	MARCH5 - MARK2P9	54708	100507674		34610	30087	rs2771267-T	rs2771267	0	2771267	intergenic_variant	1	0.7549	1e-06	6	(EA)	0.0393	[0.023-0.055] unit increase	Illumina [~ 11800000] (imputed)	N
2017-11-30	29059683	Michailidou K	2017-10-23	Nature	www.ncbi.nlm.nih.gov/pubmed/29059683	Association analysis identifies 65 new breast cancer risk loci.	Breast cancer	76,192 European ancestry cases, 63,082 European ancestry controls	46,785 European ancestry cases, 42,892 European ancestry controls, 14,068 East Asian ancestry cases, 13,104 East Asian ancestry controls	19p13.13	19	12846836	y	NR	MAST1			22983			rs117758012-T	rs117758012	0	117758012	intron_variant	0	0.0574	5e-07	6.30103	(EA)	0.0718	[0.044-0.1] unit increase	Illumina [~ 11800000] (imputed)	N
2017-11-30	29059683	Michailidou K	2017-10-23	Nature	www.ncbi.nlm.nih.gov/pubmed/29059683	Association analysis identifies 65 new breast cancer risk loci.	Breast cancer	76,192 European ancestry cases, 63,082 European ancestry controls	46,785 European ancestry cases, 42,892 European ancestry controls, 14,068 East Asian ancestry cases, 13,104 East Asian ancestry controls	1p34.1	1	45918469	y	NR	MAST2			23139			rs12077974-A	rs12077974	0	12077974	intron_variant	0	0.2825	2e-07	6.69897	(EA)	0.0364	[0.023-0.05] unit decrease	Illumina [~ 11800000] (imputed)	N
2017-11-30	29059683	Michailidou K	2017-10-23	Nature	www.ncbi.nlm.nih.gov/pubmed/29059683	Association analysis identifies 65 new breast cancer risk loci.	Breast cancer	76,192 European ancestry cases, 63,082 European ancestry controls	46,785 European ancestry cases, 42,892 European ancestry controls, 14,068 East Asian ancestry cases, 13,104 East Asian ancestry controls	20p12.3	20	5967581	y	MCM8	MCM8			84515			rs16991615-G	rs16991615	0	16991615	missense_variant	0	0.06	2e-09	8.69897	(EA)	1.1	[1.06-1.14] (Oncoarray)	Illumina [~ 11800000] (imputed)	N
2013-09-12	23535733	Garcia-Closas M	2013-04-01	Nat Genet	www.ncbi.nlm.nih.gov/pubmed/23535733	Genome-wide association studies identify four ER negative-specific breast cancer risk loci.	Breast cancer	4,193 European ancestry cases, 35,194 European ancestry controls	6,514 European ancestry cases, 41,455 European ancestry controls	1q32.1	1	204549714	y	LRRN2, PIK3C2B, MDM4	MDM4			4194			rs4245739-?	rs4245739	0	4245739	3_prime_UTR_variant	0	0.26	2e-12	11.699		1.14	[1.10-1.18]	Illumina [NR]	N
2017-03-31	27117709	Couch FJ	2016-04-27	Nat Commun	www.ncbi.nlm.nih.gov/pubmed/27117709	Identification of four novel susceptibility loci for oestrogen receptor negative breast cancer.	Breast cancer	4,939 European ancestry estrogen receptor-negative cases, 14,352 European ancestry controls	7,333 European ancestry estrogen receptor-negative cases, 7,797 European ancestry BRCA1 mutation carrier cases, 7,455 European ancestry BRCA1 mutation carrier controls, 42,468 European ancestry controls	1q32.1	1	204549714	y	MDM4	MDM4			4194			rs4245739-?	rs4245739	0	4245739	3_prime_UTR_variant	0	0.28	8e-18	17.0969		1.09	[1.05-1.14] (BRCA1 carriers)	Illumina [10909381] (imputed)	N
2017-12-19	29058716	Milne RL	2017-10-23	Nat Genet	www.ncbi.nlm.nih.gov/pubmed/29058716	Identification of ten variants associated with risk of estrogen-receptor-negative breast cancer.	Breast cancer (estrogen-receptor negative)	14,135 European ancestry cases, 58,126 European ancestry controls	7,333 European ancestry cases, 42,468 European ancestry controls	1q32.1	1	204549714	y	MDM4	MDM4			4194			rs4245739-C	rs4245739	0	4245739	3_prime_UTR_variant	0	0.26	3e-23	22.5229		1.14	[1.11-1.16]	Illumina [~ 11500000] (imputed)	N
2017-03-31	27117709	Couch FJ	2016-04-27	Nat Commun	www.ncbi.nlm.nih.gov/pubmed/27117709	Identification of four novel susceptibility loci for oestrogen receptor negative breast cancer.	Breast cancer (estrogen-receptor negative)	4,939 European ancestry cases, 14,352 European ancestry controls	7,333 European ancestry cases, 42,468 European ancestry controls	1q32.1	1	204549714	y	MDM4	MDM4			4194			rs4245739-?	rs4245739	0	4245739	3_prime_UTR_variant	0	0.26	6e-15	14.2218		1.13	[1.11-1.19]	Illumina [10909381] (imputed)	N
2014-07-29	24325915	Purrington KS	2013-12-09	Carcinogenesis	www.ncbi.nlm.nih.gov/pubmed/24325915	Genome-wide association study identifies 25 known breast cancer susceptibility loci as risk factors for triple-negative breast cancer.	Breast cancer (estrogen-receptor negative, progesterone-receptor negative, and human epidermal growth factor-receptor negative)	1,529 European ancestry cases, 3,399 European ancestry controls	2,148 European ancestry cases, 1,309 European ancestry controls	1q32.1	1	204549714	y	MDM4	MDM4			4194			rs4245739-C	rs4245739	0	4245739	3_prime_UTR_variant	0		4e-06	5.39794		1.19	[1.11-1.29]	Illumina [NR] (imputed)	N
2013-08-02	23544013	Couch FJ	2013-03-27	PLoS Genet	www.ncbi.nlm.nih.gov/pubmed/23544013	Genome-wide association study in BRCA1 mutation carriers identifies novel loci associated with breast and ovarian cancer risk.	Breast Cancer in BRCA1 mutation carriers	1,426 European ancestry cases, 1,301 European ancestry controls	6,031 European ancestry cases, 5,933 European ancestry controls	1q32.1	1	204546897	y	MDM4	MDM4			4194			rs2290854-A	rs2290854	0	2290854	intron_variant	0	0.31	1e-07	7		1.13	[1.08-1.18]	Illumina [2568349] (imputed)	N
2017-11-30	29059683	Michailidou K	2017-10-23	Nature	www.ncbi.nlm.nih.gov/pubmed/29059683	Association analysis identifies 65 new breast cancer risk loci.	Breast cancer	76,192 European ancestry cases, 63,082 European ancestry controls	46,785 European ancestry cases, 42,892 European ancestry controls, 14,068 East Asian ancestry cases, 13,104 East Asian ancestry controls	14q32.2	14	100851974	y	NR	MEG3			55384			rs2295389-G	rs2295389	0	2295389	non_coding_transcript_exon_variant	0	0.3539	2e-06	5.69897	(EA)	0.0345	[0.02-0.049] unit decrease	Illumina [~ 11800000] (imputed)	N
2017-11-30	29059683	Michailidou K	2017-10-23	Nature	www.ncbi.nlm.nih.gov/pubmed/29059683	Association analysis identifies 65 new breast cancer risk loci.	Breast cancer	76,192 European ancestry cases, 63,082 European ancestry controls	46,785 European ancestry cases, 42,892 European ancestry controls, 14,068 East Asian ancestry cases, 13,104 East Asian ancestry controls	15q14	15	37206970	y	NR	MEIS2 - LOC105370772	4212	105370772		105671	156118	rs184531260-A	rs184531260	0	184531260	intergenic_variant	1	0.0113	4e-07	6.39794	(EA)	0.21	[0.13-0.29] unit decrease	Illumina [~ 11800000] (imputed)	N
2014-10-17	24493630	Ahsan H	2014-02-03	Cancer Epidemiol Biomarkers Prev	www.ncbi.nlm.nih.gov/pubmed/24493630	A genome-wide association study of early-onset breast cancer identifies PFKM as a novel breast cancer gene and supports a common genetic spectrum for breast cancer at any age.	Breast cancer (early onset)	3,523 European ancestry young female cases, 2,702 European ancestry young female controls	3,470 European ancestry young female cases, 5,475 European ancestry young female controls	5q11.2	5	56960656	y	MAP3K1	MIER3 - LOC100130001	166968	100130001		8526	14828	rs7726354-?	rs7726354	0	7726354	intron_variant	1	0.06	7e-11	10.1549		1.37	[1.24-1.50]	Illumina [1265548] (imputed)	N
2017-11-30	29059683	Michailidou K	2017-10-23	Nature	www.ncbi.nlm.nih.gov/pubmed/29059683	Association analysis identifies 65 new breast cancer risk loci.	Breast cancer	76,192 European ancestry cases, 63,082 European ancestry controls	46,785 European ancestry cases, 42,892 European ancestry controls, 14,068 East Asian ancestry cases, 13,104 East Asian ancestry controls	5q11.2	5	56964779	y	NR	MIER3 - LOC100130001	166968	100130001		12649	10705	rs6890270-G	rs6890270	0	6890270	intron_variant	1	0.1871	5e-67	66.301	(EA)	0.1349	[0.12-0.15] unit increase	Illumina [~ 11800000] (imputed)	N
2017-11-30	29059683	Michailidou K	2017-10-23	Nature	www.ncbi.nlm.nih.gov/pubmed/29059683	Association analysis identifies 65 new breast cancer risk loci.	Breast cancer	76,192 European ancestry cases, 63,082 European ancestry controls	46,785 European ancestry cases, 42,892 European ancestry controls, 14,068 East Asian ancestry cases, 13,104 East Asian ancestry controls	8q24.21	8	128182395	y	MYC	MIR1208 - RN7SKP226	100302281	106480903		32207	38109	rs11780156-T	rs11780156	0	11780156	regulatory_region_variant	1	0.17	1e-13	13	(EA)	1.05	[1.03-1.08] (Oncoarray)	Illumina [~ 11800000] (imputed)	N
2013-09-12	23535729	Michailidou K	2013-04-01	Nat Genet	www.ncbi.nlm.nih.gov/pubmed/23535729	Large-scale genotyping identifies 41 new loci associated with breast cancer risk.	Breast cancer	10,052 European ancestry cases, 12,575 European ancestry controls	45,290 European ancestry cases, 41,880 European ancestry controls	8q24.21	8	128182395	y	MYC, MIR1208	MIR1208 - RN7SKP226	100302281	106480903		32207	38109	rs11780156-T	rs11780156	0	11780156	regulatory_region_variant	1	0.16	3e-11	10.5229		1.07	[1.04-1.10]	Affymetrix, Illumina [~ 2600000] (imputed)	N
2017-11-30	29059683	Michailidou K	2017-10-23	Nature	www.ncbi.nlm.nih.gov/pubmed/29059683	Association analysis identifies 65 new breast cancer risk loci.	Breast cancer	76,192 European ancestry cases, 63,082 European ancestry controls	46,785 European ancestry cases, 42,892 European ancestry controls, 14,068 East Asian ancestry cases, 13,104 East Asian ancestry controls	22q13.1	22	40480230	y	MKL1	MKL1			57591			rs6001930-C	rs6001930	0	6001930	intron_variant	0	0.1	4e-34	33.3979	(EA)	1.12	[1.09-1.16] (Oncoarray)	Illumina [~ 11800000] (imputed)	N
2013-09-12	23535733	Garcia-Closas M	2013-04-01	Nat Genet	www.ncbi.nlm.nih.gov/pubmed/23535733	Genome-wide association studies identify four ER negative-specific breast cancer risk loci.	Breast cancer	4,193 European ancestry cases, 35,194 European ancestry controls	6,514 European ancestry cases, 41,455 European ancestry controls	22q13.1	22	40480230	y	MKL1	MKL1			57591			rs6001930-C	rs6001930	0	6001930	intron_variant	0	0.107	2e-06	5.69897		1.14	[1.08-1.20]	Illumina [NR]	N
2013-09-12	23535729	Michailidou K	2013-04-01	Nat Genet	www.ncbi.nlm.nih.gov/pubmed/23535729	Large-scale genotyping identifies 41 new loci associated with breast cancer risk.	Breast cancer	10,052 European ancestry cases, 12,575 European ancestry controls	45,290 European ancestry cases, 41,880 European ancestry controls	22q13.1	22	40480230	y	MKL1	MKL1			57591			rs6001930-C	rs6001930	0	6001930	intron_variant	0	0.11	9e-19	18.0458		1.12	[1.09-1.16]	Affymetrix, Illumina [~ 2600000] (imputed)	N
2017-11-30	29059683	Michailidou K	2017-10-23	Nature	www.ncbi.nlm.nih.gov/pubmed/29059683	Association analysis identifies 65 new breast cancer risk loci.	Breast cancer	76,192 European ancestry cases, 63,082 European ancestry controls	46,785 European ancestry cases, 42,892 European ancestry controls, 14,068 East Asian ancestry cases, 13,104 East Asian ancestry controls	22q13.2	22	40623944	y	NR	MKL1			57591			rs6001982-A	rs6001982	0	6001982	intron_variant	0	0.1066	1e-34	34	(EA)	0.1207	[0.1-0.14] unit increase	Illumina [~ 11800000] (imputed)	N
2017-11-30	29059683	Michailidou K	2017-10-23	Nature	www.ncbi.nlm.nih.gov/pubmed/29059683	Association analysis identifies 65 new breast cancer risk loci.	Breast cancer	76,192 European ancestry cases, 63,082 European ancestry controls	46,785 European ancestry cases, 42,892 European ancestry controls, 14,068 East Asian ancestry cases, 13,104 East Asian ancestry controls	22q13.1	22	40508704	y	NR	MKL1			57591			rs66987842-C	rs66987842	0	66987842	intron_variant	0	0.11	3e-35	34.5229	(EA)	0.1233	[0.1-0.14] unit increase	Illumina [~ 11800000] (imputed)	N
2017-03-31	27117709	Couch FJ	2016-04-27	Nat Commun	www.ncbi.nlm.nih.gov/pubmed/27117709	Identification of four novel susceptibility loci for oestrogen receptor negative breast cancer.	Breast cancer	4,939 European ancestry estrogen receptor-negative cases, 14,352 European ancestry controls	7,333 European ancestry estrogen receptor-negative cases, 7,797 European ancestry BRCA1 mutation carrier cases, 7,455 European ancestry BRCA1 mutation carrier controls, 42,468 European ancestry controls	22q13.1	22	40480230	y	NR	MKL1			57591			rs6001930-?	rs6001930	0	6001930	intron_variant	0	0.11	2e-06	5.69897		1.07	[1.01-1.14] (BRCA1 carriers)	Illumina [10909381] (imputed)	N
2017-11-14	25751625	Michailidou K	2015-04-01	Nat Genet	www.ncbi.nlm.nih.gov/pubmed/25751625	Genome-wide association analysis of more than 120,000 individuals identifies 15 new susceptibility loci for breast cancer.	Breast cancer	15,748 European ancestry cases, 18,084 European ancestry controls	46,785 European ancestry cases, 42,892 European ancestry controls	22q13.1	22	40480230	y	NR	MKL1			57591			rs6001930-C	rs6001930	0	6001930	intron_variant	0	0.11	2e-20	19.699		1.12	[1.09-1.16]	Affymetrix, Illumina [~ 11600000] (imputed)	N
2017-12-19	29058716	Milne RL	2017-10-23	Nat Genet	www.ncbi.nlm.nih.gov/pubmed/29058716	Identification of ten variants associated with risk of estrogen-receptor-negative breast cancer.	Breast cancer (estrogen-receptor negative)	14,135 European ancestry cases, 58,126 European ancestry controls	7,333 European ancestry cases, 42,468 European ancestry controls	22q13.1	22	40480230	y	NR	MKL1			57591			rs6001930-C	rs6001930	0	6001930	intron_variant	0	0.1	2e-11	10.699		1.14	[1.08-1.19] (Oncoarray)	Illumina [~ 11500000] (imputed)	N
2017-11-30	29059683	Michailidou K	2017-10-23	Nature	www.ncbi.nlm.nih.gov/pubmed/29059683	Association analysis identifies 65 new breast cancer risk loci.	Breast cancer	76,192 European ancestry cases, 63,082 European ancestry controls	46,785 European ancestry cases, 42,892 European ancestry controls, 14,068 East Asian ancestry cases, 13,104 East Asian ancestry controls	10p12.31	10	21545607	y	NR	MLLT10			8028			rs7098100-A	rs7098100	0	7098100	intron_variant	0	0.3537	1e-18	18	(EA)	0.0572	[0.044-0.07] unit increase	Illumina [~ 11800000] (imputed)	N
2017-11-30	29059683	Michailidou K	2017-10-23	Nature	www.ncbi.nlm.nih.gov/pubmed/29059683	Association analysis identifies 65 new breast cancer risk loci.	Breast cancer	76,192 European ancestry cases, 63,082 European ancestry controls	46,785 European ancestry cases, 42,892 European ancestry controls, 14,068 East Asian ancestry cases, 13,104 East Asian ancestry controls	22q12.1	22	27799398	y	NR	MN1			4330			rs45589338-A	rs45589338	0	45589338	missense_variant	0	0.0352	2e-10	9.69897	(EA)	0.1112	[0.077-0.145] unit increase	Illumina [~ 11800000] (imputed)	N
2017-11-30	29059683	Michailidou K	2017-10-23	Nature	www.ncbi.nlm.nih.gov/pubmed/29059683	Association analysis identifies 65 new breast cancer risk loci.	Breast cancer	76,192 European ancestry cases, 63,082 European ancestry controls	46,785 European ancestry cases, 42,892 European ancestry controls, 14,068 East Asian ancestry cases, 13,104 East Asian ancestry controls	2q33.1	2	201666541	y	NR	MPP4			58538			rs62193398-C	rs62193398	0	62193398	intron_variant	0	0.4196	1e-07	7	(EA)	0.0332	[0.021-0.046] unit increase	Illumina [~ 11800000] (imputed)	N
2017-11-30	29059683	Michailidou K	2017-10-23	Nature	www.ncbi.nlm.nih.gov/pubmed/29059683	Association analysis identifies 65 new breast cancer risk loci.	Breast cancer	76,192 European ancestry cases, 63,082 European ancestry controls	46,785 European ancestry cases, 42,892 European ancestry controls, 14,068 East Asian ancestry cases, 13,104 East Asian ancestry controls	5q33.2	5	154976135	y	NR	MRPL22 - LOC100288010	29093	100288010		6724	18037	rs6890610-T	rs6890610	0	6890610	regulatory_region_variant	1	0.2557	6e-06	5.22185	(EA)	0.0327	[0.019-0.047] unit decrease	Illumina [~ 11800000] (imputed)	N
2010-10-15	20872241	Li J	2010-09-26	Breast Cancer Res Treat	www.ncbi.nlm.nih.gov/pubmed/20872241	A combined analysis of genome-wide association studies in breast cancer.	Breast cancer	2,702 European ancestry female cases, 5,726 European ancestry controls	Up to 7,386 cases, 7,576 controls	5p12	5	44874903	y	MRPS30	MRPS30 - HCN1	10884	348980		59389	380047	rs7716600-A	rs7716600	0	7716600	intergenic_variant	1	0.23	7e-07	6.1549		1.24	[1.14-1.34]	Illumina [285984]	N
2017-11-30	29059683	Michailidou K	2017-10-23	Nature	www.ncbi.nlm.nih.gov/pubmed/29059683	Association analysis identifies 65 new breast cancer risk loci.	Breast cancer	76,192 European ancestry cases, 63,082 European ancestry controls	46,785 European ancestry cases, 42,892 European ancestry controls, 14,068 East Asian ancestry cases, 13,104 East Asian ancestry controls	5p12	5	45074531	y	NR	MRPS30 - HCN1	10884	348980		259017	180419	rs13183434-A	rs13183434	0	13183434	intron_variant	1	0.1235	4e-17	16.3979	(EA)	0.0777	[0.06-0.096] unit increase	Illumina [~ 11800000] (imputed)	N
2017-11-30	29059683	Michailidou K	2017-10-23	Nature	www.ncbi.nlm.nih.gov/pubmed/29059683	Association analysis identifies 65 new breast cancer risk loci.	Breast cancer	76,192 European ancestry cases, 63,082 European ancestry controls	46,785 European ancestry cases, 42,892 European ancestry controls, 14,068 East Asian ancestry cases, 13,104 East Asian ancestry controls	5p12	5	44933883	y	NR	MRPS30 - HCN1	10884	348980		118369	321067	rs138060088-TTGA	rs138060088	0	138060088	intergenic_variant	1	0.5804	9e-43	42.0458	(EA)	0.0878	[0.075-0.1] unit decrease	Illumina [~ 11800000] (imputed)	N
2017-11-30	29059683	Michailidou K	2017-10-23	Nature	www.ncbi.nlm.nih.gov/pubmed/29059683	Association analysis identifies 65 new breast cancer risk loci.	Breast cancer	76,192 European ancestry cases, 63,082 European ancestry controls	46,785 European ancestry cases, 42,892 European ancestry controls, 14,068 East Asian ancestry cases, 13,104 East Asian ancestry controls	5p12	5	44822356	y	NR	MRPS30 - HCN1	10884	348980		6842	432594	rs930395-A	rs930395	0	930395	intergenic_variant	1	0.2206	2e-58	57.699	(EA)	0.1187	[0.1-0.13] unit increase	Illumina [~ 11800000] (imputed)	N
2015-10-26	25824743	Haryono SJ	2015-01-01	Asian Pac J Cancer Prev	www.ncbi.nlm.nih.gov/pubmed/25824743	A pilot genome-wide association study of breast cancer susceptibility loci in Indonesia.	Breast cancer	89 Indonesian ancestry cases, 46 Indonesian ancestry controls	NA	18p11.22	18	8716323	y	SOGA2	MTCL1			23255			rs2111836-G	rs2111836	0	2111836	intron_variant	0	0.22	7e-06	5.1549		1.32	[1.17-1.44]	Affymetrix [292887]	N
2017-11-30	29059683	Michailidou K	2017-10-23	Nature	www.ncbi.nlm.nih.gov/pubmed/29059683	Association analysis identifies 65 new breast cancer risk loci.	Breast cancer	76,192 European ancestry cases, 63,082 European ancestry controls	46,785 European ancestry cases, 42,892 European ancestry controls, 14,068 East Asian ancestry cases, 13,104 East Asian ancestry controls	1q21.2	1	149934520	y	NR	MTMR11			10903			rs11205303-C	rs11205303	0	11205303	missense_variant	0	0.3998	1e-14	14	(EA)	0.0497	[0.037-0.062] unit increase	Illumina [~ 11800000] (imputed)	N
2017-11-30	29059683	Michailidou K	2017-10-23	Nature	www.ncbi.nlm.nih.gov/pubmed/29059683	Association analysis identifies 65 new breast cancer risk loci.	Breast cancer	76,192 European ancestry cases, 63,082 European ancestry controls	46,785 European ancestry cases, 42,892 European ancestry controls, 14,068 East Asian ancestry cases, 13,104 East Asian ancestry controls	2p13.3	2	69945455	y	NR	MXD1 - ASPRV1	4084	151516		2510	14634	rs6756513-A	rs6756513	0	6756513	regulatory_region_variant	1	0.2887	4e-07	6.39794	(EA)	0.0366	[0.022-0.051] unit decrease	Illumina [~ 11800000] (imputed)	N
2017-11-30	29059683	Michailidou K	2017-10-23	Nature	www.ncbi.nlm.nih.gov/pubmed/29059683	Association analysis identifies 65 new breast cancer risk loci.	Breast cancer	76,192 European ancestry cases, 63,082 European ancestry controls	46,785 European ancestry cases, 42,892 European ancestry controls, 14,068 East Asian ancestry cases, 13,104 East Asian ancestry controls	19p13.11	19	17099805	y	NR	MYO9B			4650			rs7249698-A	rs7249698	0	7249698	intron_variant	0	0.3594	4e-07	6.39794	(EA)	0.0327	[0.02-0.045] unit decrease	Illumina [~ 11800000] (imputed)	N
2017-11-30	29059683	Michailidou K	2017-10-23	Nature	www.ncbi.nlm.nih.gov/pubmed/29059683	Association analysis identifies 65 new breast cancer risk loci.	Breast cancer	76,192 European ancestry cases, 63,082 European ancestry controls	46,785 European ancestry cases, 42,892 European ancestry controls, 14,068 East Asian ancestry cases, 13,104 East Asian ancestry controls	20q13.33	20	64247978	y	NR	MYT1 - PCMTD2	4661	55251		5725	7717	rs6062356-G	rs6062356	0	6062356	intron_variant	1	0.1495	3e-06	5.52288	(EA)	0.0405	[0.023-0.058] unit increase	Illumina [~ 11800000] (imputed)	N
2017-11-30	29059683	Michailidou K	2017-10-23	Nature	www.ncbi.nlm.nih.gov/pubmed/29059683	Association analysis identifies 65 new breast cancer risk loci.	Breast cancer	76,192 European ancestry cases, 63,082 European ancestry controls	46,785 European ancestry cases, 42,892 European ancestry controls, 14,068 East Asian ancestry cases, 13,104 East Asian ancestry controls	7q22.1	7	103143080	y	NR	NAPEPLD			222236			rs56196003-A	rs56196003	0	56196003	intron_variant	0	0.2198	5e-06	5.30103	(EA)	0.0363	[0.021-0.052] unit increase	Illumina [~ 11800000] (imputed)	N
2017-12-19	29058716	Milne RL	2017-10-23	Nat Genet	www.ncbi.nlm.nih.gov/pubmed/29058716	Identification of ten variants associated with risk of estrogen-receptor-negative breast cancer.	Breast cancer	14,135 European ancestry ER- cases, 58,126 European ancestry controls, 7,784 European ancestry BRCA1 carrrier cases, 7,782 European ancestry BRCA1 carrrier controls	7,333 European ancestry ER- cases, 42,468 European ancestry controls, 1,630 European ancestry BRCA1 carrrier cases, 1,712 European ancestry BRCA1 carrrier controls	2p23.3	2	24516826	y	NCOA1	NCOA1			8648			rs200648189-CT	rs200648189	0	200648189	intron_variant	0	0.81	1e-08	8		1.06383	[1.03-1.1] (BCAC)	Illumina [~ 11500000] (imputed)	N
2017-12-19	29058716	Milne RL	2017-10-23	Nat Genet	www.ncbi.nlm.nih.gov/pubmed/29058716	Identification of ten variants associated with risk of estrogen-receptor-negative breast cancer.	Breast Cancer in BRCA1 mutation carriers	7,784 European ancestry carrier cases, 7,782 European ancestry carrier controls	1,630 European ancestry carrier cases, 1,712 European ancestry carrier controls	2p23.3	2	24516826	y	NCOA1	NCOA1			8648			rs200648189-CT	rs200648189	0	200648189	intron_variant	0	0.8	3e-07	6.52288		1.13636	[1.09-1.19]	Illumina [~ 11500000] (imputed)	N
2017-11-30	29059683	Michailidou K	2017-10-23	Nature	www.ncbi.nlm.nih.gov/pubmed/29059683	Association analysis identifies 65 new breast cancer risk loci.	Breast cancer	76,192 European ancestry cases, 63,082 European ancestry controls	46,785 European ancestry cases, 42,892 European ancestry controls, 14,068 East Asian ancestry cases, 13,104 East Asian ancestry controls	2p23.3	2	24748307	y	NR	NCOA1			8648			rs6710503-A	rs6710503	0	6710503	intron_variant	0	0.2615	5e-06	5.30103	(EA)	0.0323	[0.018-0.046] unit increase	Illumina [~ 11800000] (imputed)	N
2017-11-30	29059683	Michailidou K	2017-10-23	Nature	www.ncbi.nlm.nih.gov/pubmed/29059683	Association analysis identifies 65 new breast cancer risk loci.	Breast cancer	76,192 European ancestry cases, 63,082 European ancestry controls	46,785 European ancestry cases, 42,892 European ancestry controls, 14,068 East Asian ancestry cases, 13,104 East Asian ancestry controls	10p12.31	10	21230606	y	NR	NEBL-AS1 - RNU6-15P	100128511	100302741		55683	91355	rs116478824-C	rs116478824	0	116478824	intergenic_variant	1	0.0455	5e-06	5.30103	(EA)	0.0675	[0.038-0.097] unit increase	Illumina [~ 11800000] (imputed)	N
2017-11-30	29059683	Michailidou K	2017-10-23	Nature	www.ncbi.nlm.nih.gov/pubmed/29059683	Association analysis identifies 65 new breast cancer risk loci.	Breast cancer	76,192 European ancestry cases, 63,082 European ancestry controls	46,785 European ancestry cases, 42,892 European ancestry controls, 14,068 East Asian ancestry cases, 13,104 East Asian ancestry controls	3p24.1	3	27290919	y	NR	NEK10			152110			rs60936670-C	rs60936670	0	60936670	intron_variant	0	0.5245	8e-64	63.0969	(EA)	0.1056	[0.093-0.118] unit increase	Illumina [~ 11800000] (imputed)	N
2014-10-17	24493630	Ahsan H	2014-02-03	Cancer Epidemiol Biomarkers Prev	www.ncbi.nlm.nih.gov/pubmed/24493630	A genome-wide association study of early-onset breast cancer identifies PFKM as a novel breast cancer gene and supports a common genetic spectrum for breast cancer at any age.	Breast cancer (early onset)	3,523 European ancestry young female cases, 2,702 European ancestry young female controls	3,470 European ancestry young female cases, 5,475 European ancestry young female controls	3p24.1	3	27302153	y	SLC4A7	NEK10			152110			rs653465-?	rs653465	0	653465	intron_variant	0	0.54	5e-12	11.301		1.18	[1.12-1.23]	Illumina [1265548] (imputed)	N
2017-11-13	19330027	Ahmed S	2009-05-01	Nat Genet	www.ncbi.nlm.nih.gov/pubmed/19330027	Newly discovered breast cancer susceptibility loci on 3p24 and 17q23.2.	Breast cancer	390 European ancestry cases, 364 European ancestry controls	11,645 European ancestry cases, 12,015 European ancestry controls	3p24.1	3	27145111	y	SLC4A7, NEK10	NEK10			152110			rs1357245-G	rs1357245	0	1357245	intron_variant	0	0.54	2e-07	6.69897		1.06	NR	Perlegen [up to 206586]	N
2017-11-30	29059683	Michailidou K	2017-10-23	Nature	www.ncbi.nlm.nih.gov/pubmed/29059683	Association analysis identifies 65 new breast cancer risk loci.	Breast cancer	76,192 European ancestry cases, 63,082 European ancestry controls	46,785 European ancestry cases, 42,892 European ancestry controls, 14,068 East Asian ancestry cases, 13,104 East Asian ancestry controls	4p16.3	4	1983006	y	NR	NELFA			7469			rs16342-TAACA	rs16342	0	16342	3_prime_UTR_variant	0	0.359	1e-06	6	(EA)	0.0361	[0.022-0.051] unit increase	Illumina [~ 11800000] (imputed)	N
2017-11-30	29059683	Michailidou K	2017-10-23	Nature	www.ncbi.nlm.nih.gov/pubmed/29059683	Association analysis identifies 65 new breast cancer risk loci.	Breast cancer	76,192 European ancestry cases, 63,082 European ancestry controls	46,785 European ancestry cases, 42,892 European ancestry controls, 14,068 East Asian ancestry cases, 13,104 East Asian ancestry controls	22q12.2	22	29714557	y	NR	NF2 - CABP7	4771	164633		15957	5533	rs140091-A	rs140091	0	140091	intron_variant	1	0.0148	4e-10	9.39794	(EA)	0.1736	[0.12-0.23] unit increase	Illumina [~ 11800000] (imputed)	N
2017-11-30	29059683	Michailidou K	2017-10-23	Nature	www.ncbi.nlm.nih.gov/pubmed/29059683	Association analysis identifies 65 new breast cancer risk loci.	Breast cancer	76,192 European ancestry cases, 63,082 European ancestry controls	46,785 European ancestry cases, 42,892 European ancestry controls, 14,068 East Asian ancestry cases, 13,104 East Asian ancestry controls	19p13.13	19	13047463	y	NFIX1	NFIX			4784			rs78269692-T	rs78269692	0	78269692	intron_variant	0	0.05	2e-09	8.69897	(EA)	1.09	[1.04-1.13] (Oncoarray)	Illumina [~ 11800000] (imputed)	N
2017-11-30	29059683	Michailidou K	2017-10-23	Nature	www.ncbi.nlm.nih.gov/pubmed/29059683	Association analysis identifies 65 new breast cancer risk loci.	Breast cancer	76,192 European ancestry cases, 63,082 European ancestry controls	46,785 European ancestry cases, 42,892 European ancestry controls, 14,068 East Asian ancestry cases, 13,104 East Asian ancestry controls	4p12	4	48056416	y	NR	NIPAL1 - TXK	152519	7294		16243	9977	rs199501877-G	rs199501877	0	199501877	regulatory_region_variant	1	0.4866	4e-07	6.39794	(EA)	0.0315	[0.019-0.044] unit decrease	Illumina [~ 11800000] (imputed)	N
2017-11-30	29059683	Michailidou K	2017-10-23	Nature	www.ncbi.nlm.nih.gov/pubmed/29059683	Association analysis identifies 65 new breast cancer risk loci.	Breast cancer	76,192 European ancestry cases, 63,082 European ancestry controls	46,785 European ancestry cases, 42,892 European ancestry controls, 14,068 East Asian ancestry cases, 13,104 East Asian ancestry controls	22q12.2	22	29581329	y	NR	NIPSNAP1			8508			rs183421746-C	rs183421746	0	183421746	5_prime_UTR_variant	0	0.0094	3e-11	10.5229	(EA)	0.2452	[0.17-0.32] unit increase	Illumina [~ 11800000] (imputed)	N
2017-11-30	29059683	Michailidou K	2017-10-23	Nature	www.ncbi.nlm.nih.gov/pubmed/29059683	Association analysis identifies 65 new breast cancer risk loci.	Breast cancer	76,192 European ancestry cases, 63,082 European ancestry controls	46,785 European ancestry cases, 42,892 European ancestry controls, 14,068 East Asian ancestry cases, 13,104 East Asian ancestry controls	5p12	5	43891334	y	NR	NNT - RNU6-381P	23530	106480576		185768	175290	rs35029702-A	rs35029702	0	35029702	intergenic_variant	1	0.0911	1e-07	7	(EA)	0.0609	[0.038-0.084] unit decrease	Illumina [~ 11800000] (imputed)	N
2017-11-30	29059683	Michailidou K	2017-10-23	Nature	www.ncbi.nlm.nih.gov/pubmed/29059683	Association analysis identifies 65 new breast cancer risk loci.	Breast cancer	76,192 European ancestry cases, 63,082 European ancestry controls	46,785 European ancestry cases, 42,892 European ancestry controls, 14,068 East Asian ancestry cases, 13,104 East Asian ancestry controls	1p12	1	120018691	y	NR	NOTCH2			4853			rs372562666-G	rs372562666	1	3879977	intron_variant	0	0.2648	6e-27	26.2218	(EA)	0.1005	[0.082-0.119] unit increase	Illumina [~ 11800000] (imputed)	N
2017-11-30	29059683	Michailidou K	2017-10-23	Nature	www.ncbi.nlm.nih.gov/pubmed/29059683	Association analysis identifies 65 new breast cancer risk loci.	Breast cancer	76,192 European ancestry cases, 63,082 European ancestry controls	46,785 European ancestry cases, 42,892 European ancestry controls, 14,068 East Asian ancestry cases, 13,104 East Asian ancestry controls	5q31.3	5	143376439	y	NR	NR3C1			2908			rs2963155-G	rs2963155	0	2963155	intron_variant	0	0.2523	7e-06	5.1549	(EA)	0.0339	[0.019-0.049] unit decrease	Illumina [~ 11800000] (imputed)	N
2017-11-30	29059683	Michailidou K	2017-10-23	Nature	www.ncbi.nlm.nih.gov/pubmed/29059683	Association analysis identifies 65 new breast cancer risk loci.	Breast cancer	76,192 European ancestry cases, 63,082 European ancestry controls	46,785 European ancestry cases, 42,892 European ancestry controls, 14,068 East Asian ancestry cases, 13,104 East Asian ancestry controls	10q25.3	10	113678604	y	NR	NRAP - CASP7	4892	840		14534	558	rs369832192-C	rs369832192	0	369832192	intergenic_variant	1	0.4764	4e-06	5.39794	(EA)	0.0302	[0.017-0.043] unit increase	Illumina [~ 11800000] (imputed)	N
2017-11-30	29059683	Michailidou K	2017-10-23	Nature	www.ncbi.nlm.nih.gov/pubmed/29059683	Association analysis identifies 65 new breast cancer risk loci.	Breast cancer	76,192 European ancestry cases, 63,082 European ancestry controls	46,785 European ancestry cases, 42,892 European ancestry controls, 14,068 East Asian ancestry cases, 13,104 East Asian ancestry controls	5q22.1	5	111882089	y	NREP	NREP			9315			rs6882649-G	rs6882649	0	6882649	intron_variant	0	0.66	4e-09	8.39794	(EA)	1.03093	[1.01-1.05] (Oncoarray)	Illumina [~ 11800000] (imputed)	N
2017-11-30	29059683	Michailidou K	2017-10-23	Nature	www.ncbi.nlm.nih.gov/pubmed/29059683	Association analysis identifies 65 new breast cancer risk loci.	Breast cancer	76,192 European ancestry cases, 63,082 European ancestry controls	46,785 European ancestry cases, 42,892 European ancestry controls, 14,068 East Asian ancestry cases, 13,104 East Asian ancestry controls	5q22.1	5	112032901	y	NR	NREP-AS1 - EPB41L4A	100873948	64097		15595	108928	rs199817973-T	rs199817973	0	199817973	intergenic_variant	1	0.05	1e-06	6	(EA)	0.0722	[0.043-0.101] unit decrease	Illumina [~ 11800000] (imputed)	N
2017-11-30	29059683	Michailidou K	2017-10-23	Nature	www.ncbi.nlm.nih.gov/pubmed/29059683	Association analysis identifies 65 new breast cancer risk loci.	Breast cancer	76,192 European ancestry cases, 63,082 European ancestry controls	46,785 European ancestry cases, 42,892 European ancestry controls, 14,068 East Asian ancestry cases, 13,104 East Asian ancestry controls	10q23.1	10	81950055	y	NR	NRG3			10718			rs76340606-A	rs76340606	0	76340606	intron_variant	0	0.0145	4e-06	5.39794	(EA)	0.1643	[0.095-0.234] unit decrease	Illumina [~ 11800000] (imputed)	N
2017-11-30	29059683	Michailidou K	2017-10-23	Nature	www.ncbi.nlm.nih.gov/pubmed/29059683	Association analysis identifies 65 new breast cancer risk loci.	Breast cancer	76,192 European ancestry cases, 63,082 European ancestry controls	46,785 European ancestry cases, 42,892 European ancestry controls, 14,068 East Asian ancestry cases, 13,104 East Asian ancestry controls	21q11.2	21	14992435	y	NR	NRIP1			8204			rs2822999-G	rs2822999	0	2822999	non_coding_transcript_exon_variant	0	0.173	2e-11	10.699	(EA)	0.0589	[0.042-0.076] unit increase	Illumina [~ 11800000] (imputed)	N
2017-11-30	29059683	Michailidou K	2017-10-23	Nature	www.ncbi.nlm.nih.gov/pubmed/29059683	Association analysis identifies 65 new breast cancer risk loci.	Breast cancer	76,192 European ancestry cases, 63,082 European ancestry controls	46,785 European ancestry cases, 42,892 European ancestry controls, 14,068 East Asian ancestry cases, 13,104 East Asian ancestry controls	14q24.3	14	78743396	y	NR	NRXN3			9369			rs112056657-G	rs112056657	0	112056657	intron_variant	0	0.0103	2e-06	5.69897	(EA)	0.1986	[0.12-0.28] unit decrease	Illumina [~ 11800000] (imputed)	N
2013-03-26	23319801	Rafiq S	2013-01-14	Cancer Res	www.ncbi.nlm.nih.gov/pubmed/23319801	Identification of inherited genetic variations influencing prognosis in early-onset breast cancer.	Breast cancer (prognosis)	536 European ancestry early-onset cases	1,516 European ancestry early-onset cases	17p13.1	17	9186907	y	NTN1	NTN1			9423			rs3785982-?	rs3785982	0	3785982	intron_variant	0	0.12	8e-06	5.09691		1.4	[1.21-1.62]	Illumina [487496]	N
2013-08-02	23544013	Couch FJ	2013-03-27	PLoS Genet	www.ncbi.nlm.nih.gov/pubmed/23544013	Genome-wide association study in BRCA1 mutation carriers identifies novel loci associated with breast and ovarian cancer risk.	Breast Cancer in BRCA1 mutation carriers	1,426 European ancestry cases, 1,301 European ancestry controls	6,031 European ancestry cases, 5,933 European ancestry controls	7p21.3	7	8512984	y	NR	NXPH1			30010			rs765855-?	rs765855	0	765855	intron_variant	0		4e-06	5.39794				Illumina [2568349] (imputed)	N
2017-11-30	29059683	Michailidou K	2017-10-23	Nature	www.ncbi.nlm.nih.gov/pubmed/29059683	Association analysis identifies 65 new breast cancer risk loci.	Breast cancer	76,192 European ancestry cases, 63,082 European ancestry controls	46,785 European ancestry cases, 42,892 European ancestry controls, 14,068 East Asian ancestry cases, 13,104 East Asian ancestry controls	7q35	7	144351809	y	NR	OR2A1-AS1			101928492			rs62485509-T	rs62485509	0	62485509	intron_variant	0	0.2292	4e-12	11.3979	(EA)	0.0545	[0.039-0.07] unit decrease	Illumina [~ 11800000] (imputed)	N
2017-11-14	25751625	Michailidou K	2015-04-01	Nat Genet	www.ncbi.nlm.nih.gov/pubmed/25751625	Genome-wide association analysis of more than 120,000 individuals identifies 15 new susceptibility loci for breast cancer.	Breast cancer	15,748 European ancestry cases, 18,084 European ancestry controls	46,785 European ancestry cases, 42,892 European ancestry controls	1q21.2	1	149955122	y	Intergenic	OTUD7B			56957			rs12048493-C	rs12048493	0	12048493	intron_variant	0	0.34	1e-09	9		1.07	[1.05-1.10]	Affymetrix, Illumina [~ 11600000] (imputed)	N
2017-11-30	29059683	Michailidou K	2017-10-23	Nature	www.ncbi.nlm.nih.gov/pubmed/29059683	Association analysis identifies 65 new breast cancer risk loci.	Breast cancer	76,192 European ancestry cases, 63,082 European ancestry controls	46,785 European ancestry cases, 42,892 European ancestry controls, 14,068 East Asian ancestry cases, 13,104 East Asian ancestry controls	1q21.2	1	149955122	y	OTUD7B	OTUD7B			56957			rs12048493-C	rs12048493	0	12048493	intron_variant	0	0.38	9e-14	13.0458	(EA)	1.04	[1.02-1.06] (Oncoarray)	Illumina [~ 11800000] (imputed)	N
2013-09-12	23535729	Michailidou K	2013-04-01	Nat Genet	www.ncbi.nlm.nih.gov/pubmed/23535729	Large-scale genotyping identifies 41 new loci associated with breast cancer risk.	Breast cancer	10,052 European ancestry cases, 12,575 European ancestry controls	45,290 European ancestry cases, 41,880 European ancestry controls	11q13.1	11	65815595	y	DKFZp761E198, OVOL1, SNX32, CFL1, MUS81	OVOL1 - SNX32	5017	254122		18376	18041	rs3903072-G	rs3903072	0	3903072	regulatory_region_variant	1	0.53	9e-12	11.0458		1.05	[1.04-1.08]	Affymetrix, Illumina [~ 2600000] (imputed)	N
2017-11-30	29059683	Michailidou K	2017-10-23	Nature	www.ncbi.nlm.nih.gov/pubmed/29059683	Association analysis identifies 65 new breast cancer risk loci.	Breast cancer	76,192 European ancestry cases, 63,082 European ancestry controls	46,785 European ancestry cases, 42,892 European ancestry controls, 14,068 East Asian ancestry cases, 13,104 East Asian ancestry controls	11q13.1	11	65815595	y	intergenic	OVOL1 - SNX32	5017	254122		18376	18041	rs3903072-G	rs3903072	0	3903072	regulatory_region_variant	1	0.53	2e-12	11.699	(EA)	1.03093	[1.01-1.05] (Oncoarray)	Illumina [~ 11800000] (imputed)	N
2017-11-14	25751625	Michailidou K	2015-04-01	Nat Genet	www.ncbi.nlm.nih.gov/pubmed/25751625	Genome-wide association analysis of more than 120,000 individuals identifies 15 new susceptibility loci for breast cancer.	Breast cancer	15,748 European ancestry cases, 18,084 European ancestry controls	46,785 European ancestry cases, 42,892 European ancestry controls	11q13.1	11	65815595	y	NR	OVOL1 - SNX32	5017	254122		18376	18041	rs3903072-G	rs3903072	0	3903072	regulatory_region_variant	1	0.53	1e-10	10		1.05263	[1.03-1.08]	Affymetrix, Illumina [~ 11600000] (imputed)	N
2017-11-30	29059683	Michailidou K	2017-10-23	Nature	www.ncbi.nlm.nih.gov/pubmed/29059683	Association analysis identifies 65 new breast cancer risk loci.	Breast cancer	76,192 European ancestry cases, 63,082 European ancestry controls	46,785 European ancestry cases, 42,892 European ancestry controls, 14,068 East Asian ancestry cases, 13,104 East Asian ancestry controls	5p12	5	43545632	y	NR	PAIP1			10605			rs191057893-G	rs191057893	0	191057893	intron_variant	0	0.0079	8e-06	5.09691	(EA)	0.2573	[0.14-0.37] unit decrease	Illumina [~ 11800000] (imputed)	N
2017-11-30	29059683	Michailidou K	2017-10-23	Nature	www.ncbi.nlm.nih.gov/pubmed/29059683	Association analysis identifies 65 new breast cancer risk loci.	Breast cancer	76,192 European ancestry cases, 63,082 European ancestry controls	46,785 European ancestry cases, 42,892 European ancestry controls, 14,068 East Asian ancestry cases, 13,104 East Asian ancestry controls	5q11.1	5	50793817	y	NR	PARP8			79668			rs26067-A	rs26067	0	26067	intron_variant	0	0.6263	2e-08	7.69897	(EA)	0.0369	[0.024-0.05] unit increase	Illumina [~ 11800000] (imputed)	N
2017-11-30	29059683	Michailidou K	2017-10-23	Nature	www.ncbi.nlm.nih.gov/pubmed/29059683	Association analysis identifies 65 new breast cancer risk loci.	Breast cancer	76,192 European ancestry cases, 63,082 European ancestry controls	46,785 European ancestry cases, 42,892 European ancestry controls, 14,068 East Asian ancestry cases, 13,104 East Asian ancestry controls	5q11.1	5	50899260	y	intergenic	PARP8 - LOC100287592	79668	100287592		52738	69957	rs35951924-AT	rs35951924	0	35951924	intergenic_variant	1	0.68	1e-11	11	(EA)	1.05263	[1.03-1.08] (Oncoarray)	Illumina [~ 11800000] (imputed)	N
2017-11-30	29059683	Michailidou K	2017-10-23	Nature	www.ncbi.nlm.nih.gov/pubmed/29059683	Association analysis identifies 65 new breast cancer risk loci.	Breast cancer	76,192 European ancestry cases, 63,082 European ancestry controls	46,785 European ancestry cases, 42,892 European ancestry controls, 14,068 East Asian ancestry cases, 13,104 East Asian ancestry controls	14q13.3	14	36667340	y	NR	PAX9			5083			rs7149262-A	rs7149262	0	7149262	intron_variant	0	0.2113	2e-21	20.699	(EA)	0.0724	[0.058-0.087] unit decrease	Illumina [~ 11800000] (imputed)	N
2017-11-14	25751625	Michailidou K	2015-04-01	Nat Genet	www.ncbi.nlm.nih.gov/pubmed/25751625	Genome-wide association analysis of more than 120,000 individuals identifies 15 new susceptibility loci for breast cancer.	Breast cancer	15,748 European ancestry cases, 18,084 European ancestry controls	46,785 European ancestry cases, 42,892 European ancestry controls	14q13.3	14	36663564	y	NR	PAX9			5083			rs2236007-G	rs2236007	0	2236007	intron_variant	0	0.79	9e-13	12.0458		1.07527	[1.05-1.1]	Affymetrix, Illumina [~ 11600000] (imputed)	N
2017-11-30	29059683	Michailidou K	2017-10-23	Nature	www.ncbi.nlm.nih.gov/pubmed/29059683	Association analysis identifies 65 new breast cancer risk loci.	Breast cancer	76,192 European ancestry cases, 63,082 European ancestry controls	46,785 European ancestry cases, 42,892 European ancestry controls, 14,068 East Asian ancestry cases, 13,104 East Asian ancestry controls	14q13.3	14	36663564	y	PAX9	PAX9			5083			rs2236007-G	rs2236007	0	2236007	intron_variant	0	0.79	4e-21	20.3979	(EA)	1.07527	[1.05-1.1] (Oncoarray)	Illumina [~ 11800000] (imputed)	N
2013-09-12	23535729	Michailidou K	2013-04-01	Nat Genet	www.ncbi.nlm.nih.gov/pubmed/23535729	Large-scale genotyping identifies 41 new loci associated with breast cancer risk.	Breast cancer	10,052 European ancestry cases, 12,575 European ancestry controls	45,290 European ancestry cases, 41,880 European ancestry controls	14q13.3	14	36663564	y	PAX9, SLC25A21	PAX9			5083			rs2236007-G	rs2236007	0	2236007	intron_variant	0	0.79	2e-13	12.699		1.08	[1.05-1.1]	Affymetrix, Illumina [~ 2600000] (imputed)	N
2013-03-26	23319801	Rafiq S	2013-01-14	Cancer Res	www.ncbi.nlm.nih.gov/pubmed/23319801	Identification of inherited genetic variations influencing prognosis in early-onset breast cancer.	Breast cancer (prognosis)	536 European ancestry early-onset cases	1,516 European ancestry early-onset cases	1q23.3	1	164720525	y	PBX1	PBX1			5087			rs1387389-?	rs1387389	0	1387389	intron_variant	0	0.36	4e-06	5.39794		1.28	[1.16-1.43]	Illumina [487496]	N
2013-03-26	23319801	Rafiq S	2013-01-14	Cancer Res	www.ncbi.nlm.nih.gov/pubmed/23319801	Identification of inherited genetic variations influencing prognosis in early-onset breast cancer.	Breast cancer (prognosis)	536 European ancestry early-onset cases	1,516 European ancestry early-onset cases	5q14.3	5	91979496	y	ARRDC3	PCBP2P3 - LOC105379080	100131236	105379080		134968	347656	rs421379-?	rs421379	0	421379	intergenic_variant	1	0.05	1e-06	6		1.61	[1.33-1.96]	Illumina [487496]	N
2015-09-22	25526632	Rafiq S	2014-12-19	PLoS One	www.ncbi.nlm.nih.gov/pubmed/25526632	A genome wide meta-analysis study for identification of common variation associated with breast cancer prognosis.	Breast cancer (survival)	1,341 European ancestry cases	1,523 European ancestry cases	5q14.3	5	91979496	y	ARRDC3	PCBP2P3 - LOC105379080	100131236	105379080		134968	347656	rs421379-?	rs421379	0	421379	intergenic_variant	1	NR	1e-06	6		1.49	[1.27-1.75]	Illumina [6500000] (imputed)	N
2017-11-30	29059683	Michailidou K	2017-10-23	Nature	www.ncbi.nlm.nih.gov/pubmed/29059683	Association analysis identifies 65 new breast cancer risk loci.	Breast cancer	76,192 European ancestry cases, 63,082 European ancestry controls	46,785 European ancestry cases, 42,892 European ancestry controls, 14,068 East Asian ancestry cases, 13,104 East Asian ancestry controls	8p22	8	17926905	y	NR	PCM1			5108			rs11779988-C	rs11779988	0	11779988	non_coding_transcript_exon_variant	0	0.6061	2e-06	5.69897	(EA)	0.0302	[0.018-0.043] unit decrease	Illumina [~ 11800000] (imputed)	N
2017-11-30	29059683	Michailidou K	2017-10-23	Nature	www.ncbi.nlm.nih.gov/pubmed/29059683	Association analysis identifies 65 new breast cancer risk loci.	Breast cancer	76,192 European ancestry cases, 63,082 European ancestry controls	46,785 European ancestry cases, 42,892 European ancestry controls, 14,068 East Asian ancestry cases, 13,104 East Asian ancestry controls	21q22.3	21	46360308	y	NR	PCNT			5116			rs9808759-C	rs9808759	0	9808759	intron_variant	0	0.9253	4e-07	6.39794	(EA)	0.0597	[0.037-0.083] unit decrease	Illumina [~ 11800000] (imputed)	N
2017-11-30	29059683	Michailidou K	2017-10-23	Nature	www.ncbi.nlm.nih.gov/pubmed/29059683	Association analysis identifies 65 new breast cancer risk loci.	Breast cancer	76,192 European ancestry cases, 63,082 European ancestry controls	46,785 European ancestry cases, 42,892 European ancestry controls, 14,068 East Asian ancestry cases, 13,104 East Asian ancestry controls	11q23.3	11	117214494	y	NR	PCSK7			9159			rs77683187-C	rs77683187	0	77683187	non_coding_transcript_exon_variant	0	0.0608	2e-06	5.69897	(EA)	0.0613	[0.036-0.087] unit increase	Illumina [~ 11800000] (imputed)	N
2017-11-30	29059683	Michailidou K	2017-10-23	Nature	www.ncbi.nlm.nih.gov/pubmed/29059683	Association analysis identifies 65 new breast cancer risk loci.	Breast cancer	76,192 European ancestry cases, 63,082 European ancestry controls	46,785 European ancestry cases, 42,892 European ancestry controls, 14,068 East Asian ancestry cases, 13,104 East Asian ancestry controls	5q11.2	5	59180291	y	NR	PDE4D			5144			rs9292195-C	rs9292195	0	9292195	intron_variant	0	0.8454	4e-07	6.39794	(EA)	0.0434	[0.027-0.06] unit decrease	Illumina [~ 11800000] (imputed)	N
2017-11-14	25751625	Michailidou K	2015-04-01	Nat Genet	www.ncbi.nlm.nih.gov/pubmed/25751625	Genome-wide association analysis of more than 120,000 individuals identifies 15 new susceptibility loci for breast cancer.	Breast cancer	15,748 European ancestry cases, 18,084 European ancestry controls	46,785 European ancestry cases, 42,892 European ancestry controls	5q11.2	5	59041654	y	NR	PDE4D			5144			rs1353747-T	rs1353747	0	1353747	intron_variant	0	0.9	3e-08	7.52288		1.08696	[1.05-1.12]	Affymetrix, Illumina [~ 11600000] (imputed)	N
2017-11-30	29059683	Michailidou K	2017-10-23	Nature	www.ncbi.nlm.nih.gov/pubmed/29059683	Association analysis identifies 65 new breast cancer risk loci.	Breast cancer	76,192 European ancestry cases, 63,082 European ancestry controls	46,785 European ancestry cases, 42,892 European ancestry controls, 14,068 East Asian ancestry cases, 13,104 East Asian ancestry controls	5q11.2	5	59041654	y	PDE4D	PDE4D			5144			rs1353747-T	rs1353747	0	1353747	intron_variant	0	0.91	4e-09	8.39794	(EA)	1.04167	[1.01-1.08] (Oncoarray)	Illumina [~ 11800000] (imputed)	N
2013-09-12	23535729	Michailidou K	2013-04-01	Nat Genet	www.ncbi.nlm.nih.gov/pubmed/23535729	Large-scale genotyping identifies 41 new loci associated with breast cancer risk.	Breast cancer	10,052 European ancestry cases, 12,575 European ancestry controls	45,290 European ancestry cases, 41,880 European ancestry controls	5q11.2	5	59041654	y	PDE4D	PDE4D			5144			rs1353747-T	rs1353747	0	1353747	intron_variant	0	0.905	3e-08	7.52288		1.09	[1.05-1.12]	Affymetrix, Illumina [~ 2600000] (imputed)	N
2017-11-30	29059683	Michailidou K	2017-10-23	Nature	www.ncbi.nlm.nih.gov/pubmed/29059683	Association analysis identifies 65 new breast cancer risk loci.	Breast cancer	76,192 European ancestry cases, 63,082 European ancestry controls	46,785 European ancestry cases, 42,892 European ancestry controls, 14,068 East Asian ancestry cases, 13,104 East Asian ancestry controls	13q13.1	13	32601963	y	NR	PDS5B			23047			rs113855064-C	rs113855064	0	113855064	intron_variant	0	0.0081	1e-07	7	(EA)	0.1877	[0.12-0.26] unit increase	Illumina [~ 11800000] (imputed)	N
2017-11-30	29059683	Michailidou K	2017-10-23	Nature	www.ncbi.nlm.nih.gov/pubmed/29059683	Association analysis identifies 65 new breast cancer risk loci.	Breast cancer	76,192 European ancestry cases, 63,082 European ancestry controls	46,785 European ancestry cases, 42,892 European ancestry controls, 14,068 East Asian ancestry cases, 13,104 East Asian ancestry controls	21q22.3	21	43733825	y	NR	PDXK			8566			rs142471995-T	rs142471995	0	142471995	intron_variant	0	0.0096	2e-06	5.69897	(EA)	0.2003	[0.12-0.28] unit decrease	Illumina [~ 11800000] (imputed)	N
2017-11-30	29059683	Michailidou K	2017-10-23	Nature	www.ncbi.nlm.nih.gov/pubmed/29059683	Association analysis identifies 65 new breast cancer risk loci.	Breast cancer	76,192 European ancestry cases, 63,082 European ancestry controls	46,785 European ancestry cases, 42,892 European ancestry controls, 14,068 East Asian ancestry cases, 13,104 East Asian ancestry controls	1p36.22	1	10535965	y	NR	PEX14			5195			rs2506889-T	rs2506889	0	2506889	non_coding_transcript_exon_variant	0	0.3185	2e-20	19.699	(EA)	0.0615	[0.048-0.075] unit decrease	Illumina [~ 11800000] (imputed)	N
2017-11-14	25751625	Michailidou K	2015-04-01	Nat Genet	www.ncbi.nlm.nih.gov/pubmed/25751625	Genome-wide association analysis of more than 120,000 individuals identifies 15 new susceptibility loci for breast cancer.	Breast cancer	15,748 European ancestry cases, 18,084 European ancestry controls	46,785 European ancestry cases, 42,892 European ancestry controls	1p36.22	1	10506158	y	NR	PEX14			5195			rs616488-A	rs616488	0	616488	intron_variant	0	0.67	4e-11	10.3979		1.06383	[1.04-1.09]	Affymetrix, Illumina [~ 11600000] (imputed)	N
2017-12-19	29058716	Milne RL	2017-10-23	Nat Genet	www.ncbi.nlm.nih.gov/pubmed/29058716	Identification of ten variants associated with risk of estrogen-receptor-negative breast cancer.	Breast cancer (estrogen-receptor negative)	14,135 European ancestry cases, 58,126 European ancestry controls	7,333 European ancestry cases, 42,468 European ancestry controls	1p36.22	1	10506158	y	NR	PEX14			5195			rs616488-A	rs616488	0	616488	intron_variant	0	0.67	4e-18	17.3979		1.1236	[1.09-1.16] (Oncoarray)	Illumina [~ 11500000] (imputed)	N
2017-11-30	29059683	Michailidou K	2017-10-23	Nature	www.ncbi.nlm.nih.gov/pubmed/29059683	Association analysis identifies 65 new breast cancer risk loci.	Breast cancer	76,192 European ancestry cases, 63,082 European ancestry controls	46,785 European ancestry cases, 42,892 European ancestry controls, 14,068 East Asian ancestry cases, 13,104 East Asian ancestry controls	1p36.22	1	10506158	y	PEX14	PEX14			5195			rs616488-A	rs616488	0	616488	intron_variant	0	0.67	5e-20	19.301	(EA)	1.06383	[1.04-1.08] (Oncoarray)	Illumina [~ 11800000] (imputed)	N
2013-09-12	23535733	Garcia-Closas M	2013-04-01	Nat Genet	www.ncbi.nlm.nih.gov/pubmed/23535733	Genome-wide association studies identify four ER negative-specific breast cancer risk loci.	Breast cancer	4,193 European ancestry cases, 35,194 European ancestry controls	6,514 European ancestry cases, 41,455 European ancestry controls	1p36.22	1	10506158	y	PEX14	PEX14			5195			rs616488-A	rs616488	0	616488	intron_variant	0	0.665	1e-08	8		1.1	[1.06-1.14]	Illumina [NR]	N
2013-09-12	23535729	Michailidou K	2013-04-01	Nat Genet	www.ncbi.nlm.nih.gov/pubmed/23535729	Large-scale genotyping identifies 41 new loci associated with breast cancer risk.	Breast cancer	10,052 European ancestry cases, 12,575 European ancestry controls	45,290 European ancestry cases, 41,880 European ancestry controls	1p36.22	1	10506158	y	PEX14	PEX14			5195			rs616488-A	rs616488	0	616488	intron_variant	0	0.67	2e-10	9.69897		1.06	[1.04-1.09]	Affymetrix, Illumina [~ 2600000] (imputed)	N
2017-03-31	27117709	Couch FJ	2016-04-27	Nat Commun	www.ncbi.nlm.nih.gov/pubmed/27117709	Identification of four novel susceptibility loci for oestrogen receptor negative breast cancer.	Breast cancer	4,939 European ancestry estrogen receptor-negative cases, 14,352 European ancestry controls	7,333 European ancestry estrogen receptor-negative cases, 7,797 European ancestry BRCA1 mutation carrier cases, 7,455 European ancestry BRCA1 mutation carrier controls, 42,468 European ancestry controls	1p36.22	1	10503552	y	PEX14	PEX14			5195			rs10864459-?	rs10864459	0	10864459	intron_variant	0	0.69	5e-10	9.30103		1.05263	[1.01-1.1] (BRCA1 carriers)	Illumina [10909381] (imputed)	N
2017-03-31	27117709	Couch FJ	2016-04-27	Nat Commun	www.ncbi.nlm.nih.gov/pubmed/27117709	Identification of four novel susceptibility loci for oestrogen receptor negative breast cancer.	Breast cancer (estrogen-receptor negative)	4,939 European ancestry cases, 14,352 European ancestry controls	7,333 European ancestry cases, 42,468 European ancestry controls	1p36.22	1	10503552	y	PEX14	PEX14			5195			rs10864459-?	rs10864459	0	10864459	intron_variant	0	0.68	2e-09	8.69897		1.11111	[1.08-1.15]	Illumina [10909381] (imputed)	N
2017-11-30	29059683	Michailidou K	2017-10-23	Nature	www.ncbi.nlm.nih.gov/pubmed/29059683	Association analysis identifies 65 new breast cancer risk loci.	Breast cancer	76,192 European ancestry cases, 63,082 European ancestry controls	46,785 European ancestry cases, 42,892 European ancestry controls, 14,068 East Asian ancestry cases, 13,104 East Asian ancestry controls	3p21.31	3	48542329	y	NR	PFKFB4			5210			rs13079292-G	rs13079292	0	13079292	intron_variant	0	0.9798	8e-06	5.09691	(EA)	0.1064	[0.06-0.153] unit increase	Illumina [~ 11800000] (imputed)	N
2017-11-30	29059683	Michailidou K	2017-10-23	Nature	www.ncbi.nlm.nih.gov/pubmed/29059683	Association analysis identifies 65 new breast cancer risk loci.	Breast cancer	76,192 European ancestry cases, 63,082 European ancestry controls	46,785 European ancestry cases, 42,892 European ancestry controls, 14,068 East Asian ancestry cases, 13,104 East Asian ancestry controls	20q11.23	20	35933106	y	NR	PHF20			51230			rs201177249-C	rs201177249	0	201177249	intron_variant	0	0.1351	4e-06	5.39794	(EA)	0.0462	[0.027-0.066] unit increase	Illumina [~ 11800000] (imputed)	N
2017-11-30	29059683	Michailidou K	2017-10-23	Nature	www.ncbi.nlm.nih.gov/pubmed/29059683	Association analysis identifies 65 new breast cancer risk loci.	Breast cancer	76,192 European ancestry cases, 63,082 European ancestry controls	46,785 European ancestry cases, 42,892 European ancestry controls, 14,068 East Asian ancestry cases, 13,104 East Asian ancestry controls	1p12	1	119716347	y	NR	PHGDH			26227			rs666930-C	rs666930	0	666930	intron_variant	0	0.5338	5e-08	7.30103	(EA)	0.0347	[0.022-0.047] unit increase	Illumina [~ 11800000] (imputed)	N
2017-11-30	29059683	Michailidou K	2017-10-23	Nature	www.ncbi.nlm.nih.gov/pubmed/29059683	Association analysis identifies 65 new breast cancer risk loci.	Breast cancer	76,192 European ancestry cases, 63,082 European ancestry controls	46,785 European ancestry cases, 42,892 European ancestry controls, 14,068 East Asian ancestry cases, 13,104 East Asian ancestry controls	1q32.1	1	201468704	y	PHLDA3	PHLDA3			23612			rs35383942-C	rs35383942	0	35383942	missense_variant	0	0.06	4e-13	12.3979	(EA)	1.12	[1.08-1.17] (Oncoarray)	Illumina [~ 11800000] (imputed)	N
2017-11-30	29059683	Michailidou K	2017-10-23	Nature	www.ncbi.nlm.nih.gov/pubmed/29059683	Association analysis identifies 65 new breast cancer risk loci.	Breast cancer	76,192 European ancestry cases, 63,082 European ancestry controls	46,785 European ancestry cases, 42,892 European ancestry controls, 14,068 East Asian ancestry cases, 13,104 East Asian ancestry controls	19q13.31	19	43484866	y	NR	PHLDB3			653583			rs66849333-T	rs66849333	0	66849333	intron_variant	0	0.0561	1e-06	6	(EA)	0.0693	[0.041-0.097] unit decrease	Illumina [~ 11800000] (imputed)	N
2017-11-30	29059683	Michailidou K	2017-10-23	Nature	www.ncbi.nlm.nih.gov/pubmed/29059683	Association analysis identifies 65 new breast cancer risk loci.	Breast cancer	76,192 European ancestry cases, 63,082 European ancestry controls	46,785 European ancestry cases, 42,892 European ancestry controls, 14,068 East Asian ancestry cases, 13,104 East Asian ancestry controls	5q13.1	5	68315658	y	NR	PIK3R1 - LOC105379013	5295	105379013		13837	113928	rs184886-C	rs184886	0	184886	intergenic_variant	1	0.724	2e-06	5.69897	(EA)	0.0333	[0.02-0.047] unit increase	Illumina [~ 11800000] (imputed)	N
2017-11-30	29059683	Michailidou K	2017-10-23	Nature	www.ncbi.nlm.nih.gov/pubmed/29059683	Association analysis identifies 65 new breast cancer risk loci.	Breast cancer	76,192 European ancestry cases, 63,082 European ancestry controls	46,785 European ancestry cases, 42,892 European ancestry controls, 14,068 East Asian ancestry cases, 13,104 East Asian ancestry controls	10p12.2	10	22681806	y	NR	PIP4K2A			5305			rs370356098-C	rs370356098	0	370356098	intron_variant	0	0.0399	2e-07	6.69897	(EA)	0.0837	[0.052-0.115] unit decrease	Illumina [~ 11800000] (imputed)	N
2017-11-30	29059683	Michailidou K	2017-10-23	Nature	www.ncbi.nlm.nih.gov/pubmed/29059683	Association analysis identifies 65 new breast cancer risk loci.	Breast cancer	76,192 European ancestry cases, 63,082 European ancestry controls	46,785 European ancestry cases, 42,892 European ancestry controls, 14,068 East Asian ancestry cases, 13,104 East Asian ancestry controls	10p12.2	10	22581150	y	NR	PIP4K2A			5305			rs56333866-T	rs56333866	0	56333866	intron_variant	0	0.9624	3e-08	7.52288	(EA)	0.0928	[0.06-0.126] unit increase	Illumina [~ 11800000] (imputed)	N
2017-11-30	29059683	Michailidou K	2017-10-23	Nature	www.ncbi.nlm.nih.gov/pubmed/29059683	Association analysis identifies 65 new breast cancer risk loci.	Breast cancer	76,192 European ancestry cases, 63,082 European ancestry controls	46,785 European ancestry cases, 42,892 European ancestry controls, 14,068 East Asian ancestry cases, 13,104 East Asian ancestry controls	22q12.1	22	27918624	y	NR	PITPNB			23760			rs62235635-A	rs62235635	0	62235635	intron_variant	0	0.0065	1e-27	27	(EA)	0.4659	[0.38-0.55] unit increase	Illumina [~ 11800000] (imputed)	N
2017-11-30	29059683	Michailidou K	2017-10-23	Nature	www.ncbi.nlm.nih.gov/pubmed/29059683	Association analysis identifies 65 new breast cancer risk loci.	Breast cancer	76,192 European ancestry cases, 63,082 European ancestry controls	46,785 European ancestry cases, 42,892 European ancestry controls, 14,068 East Asian ancestry cases, 13,104 East Asian ancestry controls	4q22.1	4	88058377	y	NR	PKD2			5311			rs2725207-A	rs2725207	0	2725207	intron_variant	0	0.1439	6e-07	6.22185	(EA)	0.0455	[0.028-0.063] unit decrease	Illumina [~ 11800000] (imputed)	N
2017-11-30	29059683	Michailidou K	2017-10-23	Nature	www.ncbi.nlm.nih.gov/pubmed/29059683	Association analysis identifies 65 new breast cancer risk loci.	Breast cancer	76,192 European ancestry cases, 63,082 European ancestry controls	46,785 European ancestry cases, 42,892 European ancestry controls, 14,068 East Asian ancestry cases, 13,104 East Asian ancestry controls	6q22.31	6	122554525	y	NR	PKIB			5570			rs76092474-T	rs76092474	0	76092474	intron_variant	0	0.113	3e-06	5.52288	(EA)	0.046	[0.027-0.065] unit increase	Illumina [~ 11800000] (imputed)	N
2017-11-30	29059683	Michailidou K	2017-10-23	Nature	www.ncbi.nlm.nih.gov/pubmed/29059683	Association analysis identifies 65 new breast cancer risk loci.	Breast cancer	76,192 European ancestry cases, 63,082 European ancestry controls	46,785 European ancestry cases, 42,892 European ancestry controls, 14,068 East Asian ancestry cases, 13,104 East Asian ancestry controls	1q22	1	155302483	y	NR	PKLR - FDPS	5313	2224		1049	6265	rs7524950-T	rs7524950	0	7524950	intergenic_variant	1	0.2587	3e-09	8.52288	(EA)	0.0419	[0.028-0.056] unit increase	Illumina [~ 11800000] (imputed)	N
2017-11-30	29059683	Michailidou K	2017-10-23	Nature	www.ncbi.nlm.nih.gov/pubmed/29059683	Association analysis identifies 65 new breast cancer risk loci.	Breast cancer	76,192 European ancestry cases, 63,082 European ancestry controls	46,785 European ancestry cases, 42,892 European ancestry controls, 14,068 East Asian ancestry cases, 13,104 East Asian ancestry controls	8q21.13	8	75393550	y	NR	PKMP4 - HNF4G	106480443	3174		16536	14017	rs72658071-T	rs72658071	0	72658071	intergenic_variant	1	0.0877	3e-28	27.5229	(EA)	0.1182	[0.097-0.139] unit increase	Illumina [~ 11800000] (imputed)	N
2017-11-30	29059683	Michailidou K	2017-10-23	Nature	www.ncbi.nlm.nih.gov/pubmed/29059683	Association analysis identifies 65 new breast cancer risk loci.	Breast cancer	76,192 European ancestry cases, 63,082 European ancestry controls	46,785 European ancestry cases, 42,892 European ancestry controls, 14,068 East Asian ancestry cases, 13,104 East Asian ancestry controls	22q13.1	22	38174306	y	NR	PLA2G6			8398			rs4820318-A	rs4820318	0	4820318	intron_variant	0	0.3753	1e-13	13	(EA)	0.0475	[0.035-0.06] unit decrease	Illumina [~ 11800000] (imputed)	N
2017-11-30	29059683	Michailidou K	2017-10-23	Nature	www.ncbi.nlm.nih.gov/pubmed/29059683	Association analysis identifies 65 new breast cancer risk loci.	Breast cancer	76,192 European ancestry cases, 63,082 European ancestry controls	46,785 European ancestry cases, 42,892 European ancestry controls, 14,068 East Asian ancestry cases, 13,104 East Asian ancestry controls	22q13.1	22	38172826	y	PLA2G6	PLA2G6			8398			rs738321-G	rs738321	0	738321	intron_variant	0	0.62	1e-13	13	(EA)	1.05263	[1.03-1.08] (Oncoarray)	Illumina [~ 11800000] (imputed)	N
2014-04-02	24080446	Rudolph A	2013-11-04	Endocr Relat Cancer	www.ncbi.nlm.nih.gov/pubmed/24080446	Genetic modifiers of menopausal hormone replacement therapy and breast cancer risk: a genome-wide interaction study.	Breast cancer (menopausal hormone therapy interaction)	2,920 European ancestry cases	7,689 European ancestry cases, 9,266 European ancestry controls	16q23.3	16	81924693	y	PLCG2	PLCG2			5336			rs7192724-?	rs7192724	0	7192724	intron_variant	0		3e-06	5.52288		1.24	[1.13-1.36]	Illumina [2500000] (imputed)	N
2017-11-30	29059683	Michailidou K	2017-10-23	Nature	www.ncbi.nlm.nih.gov/pubmed/29059683	Association analysis identifies 65 new breast cancer risk loci.	Breast cancer	76,192 European ancestry cases, 63,082 European ancestry controls	46,785 European ancestry cases, 42,892 European ancestry controls, 14,068 East Asian ancestry cases, 13,104 East Asian ancestry controls	4q12	4	57013626	y	NR	POLR2B			5431			rs4865169-T	rs4865169	0	4865169	intron_variant	0	0.5239	7e-06	5.1549	(EA)	0.0278	[0.016-0.04] unit increase	Illumina [~ 11800000] (imputed)	N
2017-11-30	29059683	Michailidou K	2017-10-23	Nature	www.ncbi.nlm.nih.gov/pubmed/29059683	Association analysis identifies 65 new breast cancer risk loci.	Breast cancer	76,192 European ancestry cases, 63,082 European ancestry controls	46,785 European ancestry cases, 42,892 European ancestry controls, 14,068 East Asian ancestry cases, 13,104 East Asian ancestry controls	7q22.1	7	102478605	y	NR	POLR2J			5439			rs369574511-C	rs369574511	1	62483813	intron_variant	0	0.6318	2e-07	6.69897	(EA)	0.0364	[0.023-0.05] unit decrease	Illumina [~ 11800000] (imputed)	N
2017-11-30	29059683	Michailidou K	2017-10-23	Nature	www.ncbi.nlm.nih.gov/pubmed/29059683	Association analysis identifies 65 new breast cancer risk loci.	Breast cancer	76,192 European ancestry cases, 63,082 European ancestry controls	46,785 European ancestry cases, 42,892 European ancestry controls, 14,068 East Asian ancestry cases, 13,104 East Asian ancestry controls	4q24	4	105435604	y	NR	PPA2			27068			rs77928427-A	rs77928427	0	77928427	intron_variant	0	0.2392	3e-08	7.52288	(EA)	0.04	[0.026-0.054] unit increase	Illumina [~ 11800000] (imputed)	N
2017-03-31	27117709	Couch FJ	2016-04-27	Nat Commun	www.ncbi.nlm.nih.gov/pubmed/27117709	Identification of four novel susceptibility loci for oestrogen receptor negative breast cancer.	Breast cancer (estrogen-receptor negative)	4,939 European ancestry cases, 14,352 European ancestry controls	7,333 European ancestry cases, 42,468 European ancestry controls	2q33.1	2	200878871	y	PPIL3, CLK1, FAM126B, NDUFB3	PPIL3			53938			rs115635831-?	rs115635831	0	115635831	intron_variant	0	0.015	1e-06	6		1.36	[1.20-1.54]	Illumina [10909381] (imputed)	N
2017-11-30	29059683	Michailidou K	2017-10-23	Nature	www.ncbi.nlm.nih.gov/pubmed/29059683	Association analysis identifies 65 new breast cancer risk loci.	Breast cancer	76,192 European ancestry cases, 63,082 European ancestry controls	46,785 European ancestry cases, 42,892 European ancestry controls, 14,068 East Asian ancestry cases, 13,104 East Asian ancestry controls	6p21.33	6	30682249	y	NR	PPP1R18			170954			rs9262142-A	rs9262142	0	9262142	intron_variant	0	0.1166	3e-06	5.52288	(EA)	0.0489	[0.028-0.069] unit decrease	Illumina [~ 11800000] (imputed)	N
2017-11-30	29059683	Michailidou K	2017-10-23	Nature	www.ncbi.nlm.nih.gov/pubmed/29059683	Association analysis identifies 65 new breast cancer risk loci.	Breast cancer	76,192 European ancestry cases, 63,082 European ancestry controls	46,785 European ancestry cases, 42,892 European ancestry controls, 14,068 East Asian ancestry cases, 13,104 East Asian ancestry controls	11q23.1	11	111765903	y	NR	PPP2R1B			5519			rs643506-G	rs643506	0	643506	5_prime_UTR_variant	0	0.6757	2e-07	6.69897	(EA)	0.0344	[0.021-0.047] unit decrease	Illumina [~ 11800000] (imputed)	N
2017-11-30	29059683	Michailidou K	2017-10-23	Nature	www.ncbi.nlm.nih.gov/pubmed/29059683	Association analysis identifies 65 new breast cancer risk loci.	Breast cancer	76,192 European ancestry cases, 63,082 European ancestry controls	46,785 European ancestry cases, 42,892 European ancestry controls, 14,068 East Asian ancestry cases, 13,104 East Asian ancestry controls	15q26.1	15	90968837	y	PRC1	PRC1-AS1, PRC1			100507118, 9055			rs2290203-G	rs2290203	0	2290203	3_prime_UTR_variant	0	0.79	8e-10	9.09691		1.06383	[1.04-1.09] (Oncoarray)	Illumina [~ 11800000] (imputed)	N
2015-04-01	25038754	Cai Q	2014-07-20	Nat Genet	www.ncbi.nlm.nih.gov/pubmed/25038754	Genome-wide association analysis in East Asians identifies breast cancer susceptibility loci at 1q32.1, 5q14.3 and 15q26.1.	Breast cancer	2,867 Chinese ancestry cases, 2,285 Chinese ancestry controls, 2,246 Korean ancestry cases, 2,052 Korean ancestry controls	5,029 Chinese ancestry cases, 5,302 Chinese ancestry controls, 6,066 Korean ancestry cases, 8,003 Korean ancestry controls, 6,572 Japanese ancestry cases, 6,539 Japanese ancestry controls, 16,003 European ancestry cases, 41,335 European ancestry controls	15q26.1	15	90968837	y	PRC1	PRC1-AS1, PRC1			100507118, 9055			rs2290203-G	rs2290203	0	2290203	3_prime_UTR_variant	0	0.504	4e-08	7.39794	(East Asian)	1.08	[1.05-1.11]	Affymetrix [up to 1930412] (imputed)	N
2017-11-30	29059683	Michailidou K	2017-10-23	Nature	www.ncbi.nlm.nih.gov/pubmed/29059683	Association analysis identifies 65 new breast cancer risk loci.	Breast cancer	76,192 European ancestry cases, 63,082 European ancestry controls	46,785 European ancestry cases, 42,892 European ancestry controls, 14,068 East Asian ancestry cases, 13,104 East Asian ancestry controls	6q16.2	6	99643666	y	NR	PRDM13 - MCHR2	59336	84539		28088	276244	rs377527229-C	rs377527229	0	377527229	intergenic_variant	1	0.2282	6e-06	5.22185	(EA)	0.0341	[0.019-0.049] unit increase	Illumina [~ 11800000] (imputed)	N
2017-11-30	29059683	Michailidou K	2017-10-23	Nature	www.ncbi.nlm.nih.gov/pubmed/29059683	Association analysis identifies 65 new breast cancer risk loci.	Breast cancer	76,192 European ancestry cases, 63,082 European ancestry controls	46,785 European ancestry cases, 42,892 European ancestry controls, 14,068 East Asian ancestry cases, 13,104 East Asian ancestry controls	5q23.2	5	123142308	y	NR	PRDM6			93166			rs10629804-GCTTCA	rs10629804	0	10629804	intron_variant	0	0.7425	1e-06	6	(EA)	0.0345	[0.021-0.048] unit decrease	Illumina [~ 11800000] (imputed)	N
2017-11-30	29059683	Michailidou K	2017-10-23	Nature	www.ncbi.nlm.nih.gov/pubmed/29059683	Association analysis identifies 65 new breast cancer risk loci.	Breast cancer	76,192 European ancestry cases, 63,082 European ancestry controls	46,785 European ancestry cases, 42,892 European ancestry controls, 14,068 East Asian ancestry cases, 13,104 East Asian ancestry controls	3p14.1	3	64074452	y	NR	PRICKLE2-AS1			100652759			rs1450985-A	rs1450985	0	1450985	intron_variant	0	0.4155	6e-08	7.22185	(EA)	0.035	[0.022-0.048] unit increase	Illumina [~ 11800000] (imputed)	N
2017-11-30	29059683	Michailidou K	2017-10-23	Nature	www.ncbi.nlm.nih.gov/pubmed/29059683	Association analysis identifies 65 new breast cancer risk loci.	Breast cancer	76,192 European ancestry cases, 63,082 European ancestry controls	46,785 European ancestry cases, 42,892 European ancestry controls, 14,068 East Asian ancestry cases, 13,104 East Asian ancestry controls	10q21.1	10	51918266	y	NR	PRKG1			5592			rs1937680-A	rs1937680	0	1937680	intron_variant	0	0.6658	3e-07	6.52288	(EA)	0.0341	[0.021-0.047] unit decrease	Illumina [~ 11800000] (imputed)	N
2017-11-30	29059683	Michailidou K	2017-10-23	Nature	www.ncbi.nlm.nih.gov/pubmed/29059683	Association analysis identifies 65 new breast cancer risk loci.	Breast cancer	76,192 European ancestry cases, 63,082 European ancestry controls	46,785 European ancestry cases, 42,892 European ancestry controls, 14,068 East Asian ancestry cases, 13,104 East Asian ancestry controls	3p21.31	3	46846708	y	NR	PRSS42 - MYL3	339906	4634		12613	11159	rs56387622-C	rs56387622	0	56387622	regulatory_region_variant	1	0.1012	5e-19	18.301	(EA)	0.0942	[0.073-0.115] unit decrease	Illumina [~ 11800000] (imputed)	N
2017-11-30	29059683	Michailidou K	2017-10-23	Nature	www.ncbi.nlm.nih.gov/pubmed/29059683	Association analysis identifies 65 new breast cancer risk loci.	Breast cancer	76,192 European ancestry cases, 63,082 European ancestry controls	46,785 European ancestry cases, 42,892 European ancestry controls, 14,068 East Asian ancestry cases, 13,104 East Asian ancestry controls	12p11.22	12	28021884	y	intergenic	PTHLH - LOC105369710	5744	105369710		47697	39757	rs7297051-C	rs7297051	0	7297051	regulatory_region_variant	1	0.76	3e-60	59.5229		1.1236	[1.1-1.15] (Oncoarray)	Illumina [~ 11800000] (imputed)	N
2013-08-02	23544013	Couch FJ	2013-03-27	PLoS Genet	www.ncbi.nlm.nih.gov/pubmed/23544013	Genome-wide association study in BRCA1 mutation carriers identifies novel loci associated with breast and ovarian cancer risk.	Breast Cancer in BRCA1 mutation carriers	1,426 European ancestry cases, 1,301 European ancestry controls	6,031 European ancestry cases, 5,933 European ancestry controls	12p11.22	12	28002147	y	intergenic	PTHLH - LOC105369710	5744	105369710		27960	59494	rs10771399-A	rs10771399	0	10771399	intergenic_variant	1	0.86	8e-06	5.09691		1.18	[1.1-1.27]	Illumina [2568349] (imputed)	N
2017-11-14	25751625	Michailidou K	2015-04-01	Nat Genet	www.ncbi.nlm.nih.gov/pubmed/25751625	Genome-wide association analysis of more than 120,000 individuals identifies 15 new susceptibility loci for breast cancer.	Breast cancer	15,748 European ancestry cases, 18,084 European ancestry controls	46,785 European ancestry cases, 42,892 European ancestry controls	12p11.22	12	28002147	y	NR	PTHLH - LOC105369710	5744	105369710		27960	59494	rs10771399-A	rs10771399	0	10771399	intergenic_variant	1	0.88	5e-34	33.301		1.16279	[1.12-1.2]	Affymetrix, Illumina [~ 11600000] (imputed)	N
2017-12-19	29058716	Milne RL	2017-10-23	Nat Genet	www.ncbi.nlm.nih.gov/pubmed/29058716	Identification of ten variants associated with risk of estrogen-receptor-negative breast cancer.	Breast cancer (estrogen-receptor negative)	14,135 European ancestry cases, 58,126 European ancestry controls	7,333 European ancestry cases, 42,468 European ancestry controls	12p11.22	12	28021884	y	NR	PTHLH - LOC105369710	5744	105369710		47697	39757	rs7297051-C	rs7297051	0	7297051	regulatory_region_variant	1	0.76	9e-25	24.0458		1.14943	[1.1-1.19] (Oncoarray)	Illumina [~ 11500000] (imputed)	N
2017-12-19	29058716	Milne RL	2017-10-23	Nat Genet	www.ncbi.nlm.nih.gov/pubmed/29058716	Identification of ten variants associated with risk of estrogen-receptor-negative breast cancer.	Breast Cancer in BRCA1 mutation carriers	7,784 European ancestry carrier cases, 7,782 European ancestry carrier controls	1,630 European ancestry carrier cases, 1,712 European ancestry carrier controls	12p11.22	12	28021884	y	NR	PTHLH - LOC105369710	5744	105369710		47697	39757	rs7297051-C	rs7297051	0	7297051	regulatory_region_variant	1	0.76	8e-09	8.09691		1.13636	[1.09-1.18]	Illumina [~ 11500000] (imputed)	N
2013-09-12	23535733	Garcia-Closas M	2013-04-01	Nat Genet	www.ncbi.nlm.nih.gov/pubmed/23535733	Genome-wide association studies identify four ER negative-specific breast cancer risk loci.	Breast cancer	4,193 European ancestry cases, 35,194 European ancestry controls	6,514 European ancestry cases, 41,455 European ancestry controls	12p11.22	12	28002147	y	PTHLH	PTHLH - LOC105369710	5744	105369710		27960	59494	rs10771399-T	rs10771399	0	10771399	intergenic_variant	1	0.895	2e-12	11.699		1.2	[1.15-1.27]	Illumina [NR]	N
2013-09-12	23535729	Michailidou K	2013-04-01	Nat Genet	www.ncbi.nlm.nih.gov/pubmed/23535729	Large-scale genotyping identifies 41 new loci associated with breast cancer risk.	Breast cancer	10,052 European ancestry cases, 12,575 European ancestry controls	45,290 European ancestry cases, 41,880 European ancestry controls	12p11.22	12	28002147	y	PTHLH	PTHLH - LOC105369710	5744	105369710		27960	59494	rs10771399-A	rs10771399	0	10771399	intergenic_variant	1	0.88	8e-31	30.0969		1.16	[1.14-1.2]	Affymetrix, Illumina [~ 2600000] (imputed)	N
2017-03-31	27117709	Couch FJ	2016-04-27	Nat Commun	www.ncbi.nlm.nih.gov/pubmed/27117709	Identification of four novel susceptibility loci for oestrogen receptor negative breast cancer.	Breast cancer	4,939 European ancestry estrogen receptor-negative cases, 14,352 European ancestry controls	7,333 European ancestry estrogen receptor-negative cases, 7,797 European ancestry BRCA1 mutation carrier cases, 7,455 European ancestry BRCA1 mutation carrier controls, 42,468 European ancestry controls	12p11.22	12	28021884	y	PTHLH	PTHLH - LOC105369710	5744	105369710		47697	39757	rs7297051-?	rs7297051	0	7297051	regulatory_region_variant	1	0.77	3e-20	19.5229		1.1236	[1.08-1.18] (BRCA1 carriers)	Illumina [10909381] (imputed)	N
2017-03-31	27117709	Couch FJ	2016-04-27	Nat Commun	www.ncbi.nlm.nih.gov/pubmed/27117709	Identification of four novel susceptibility loci for oestrogen receptor negative breast cancer.	Breast cancer	4,939 European ancestry estrogen receptor-negative cases, 14,352 European ancestry controls	7,333 European ancestry estrogen receptor-negative cases, 7,797 European ancestry BRCA1 mutation carrier cases, 7,455 European ancestry BRCA1 mutation carrier controls, 42,468 European ancestry controls	12p11.22	12	28002147	y	PTHLH	PTHLH - LOC105369710	5744	105369710		27960	59494	rs10771399-?	rs10771399	0	10771399	intergenic_variant	1	0.9	7e-18	17.1549		1.16279	[1.1-1.25] (BRCA1 carriers)	Illumina [10909381] (imputed)	N
2017-03-31	27117709	Couch FJ	2016-04-27	Nat Commun	www.ncbi.nlm.nih.gov/pubmed/27117709	Identification of four novel susceptibility loci for oestrogen receptor negative breast cancer.	Breast cancer (estrogen-receptor negative)	4,939 European ancestry cases, 14,352 European ancestry controls	7,333 European ancestry cases, 42,468 European ancestry controls	12p11.22	12	28021884	y	PTHLH	PTHLH - LOC105369710	5744	105369710		47697	39757	rs7297051-?	rs7297051	0	7297051	regulatory_region_variant	1	0.76	1e-14	14		1.16279	[1.12-1.2]	Illumina [10909381] (imputed)	N
2017-03-31	27117709	Couch FJ	2016-04-27	Nat Commun	www.ncbi.nlm.nih.gov/pubmed/27117709	Identification of four novel susceptibility loci for oestrogen receptor negative breast cancer.	Breast cancer (estrogen-receptor negative)	4,939 European ancestry cases, 14,352 European ancestry controls	7,333 European ancestry cases, 42,468 European ancestry controls	12p11.22	12	28002147	y	PTHLH	PTHLH - LOC105369710	5744	105369710		27960	59494	rs10771399-?	rs10771399	0	10771399	intergenic_variant	1	0.88	4e-13	12.3979		1.26582	[1.15-1.28]	Illumina [10909381] (imputed)	N
2014-07-29	24325915	Purrington KS	2013-12-09	Carcinogenesis	www.ncbi.nlm.nih.gov/pubmed/24325915	Genome-wide association study identifies 25 known breast cancer susceptibility loci as risk factors for triple-negative breast cancer.	Breast cancer (estrogen-receptor negative, progesterone-receptor negative, and human epidermal growth factor-receptor negative)	1,529 European ancestry cases, 3,399 European ancestry controls	2,148 European ancestry cases, 1,309 European ancestry controls	12p11.22	12	28002147	y	PTHLH	PTHLH - LOC105369710	5744	105369710		27960	59494	rs10771399-G	rs10771399	0	10771399	intergenic_variant	1		2e-08	7.69897		1.3889	[1.25-1.56]	Illumina [NR] (imputed)	N
2017-11-30	29059683	Michailidou K	2017-10-23	Nature	www.ncbi.nlm.nih.gov/pubmed/29059683	Association analysis identifies 65 new breast cancer risk loci.	Breast cancer	76,192 European ancestry cases, 63,082 European ancestry controls	46,785 European ancestry cases, 42,892 European ancestry controls, 14,068 East Asian ancestry cases, 13,104 East Asian ancestry controls	15q24.2	15	75516399	y	NR	PTPN9			5780			rs8027365-C	rs8027365	0	8027365	intron_variant	0	0.2707	1e-07	7	(EA)	0.038	[0.024-0.052] unit decrease	Illumina [~ 11800000] (imputed)	N
2017-11-30	29059683	Michailidou K	2017-10-23	Nature	www.ncbi.nlm.nih.gov/pubmed/29059683	Association analysis identifies 65 new breast cancer risk loci.	Breast cancer	76,192 European ancestry cases, 63,082 European ancestry controls	46,785 European ancestry cases, 42,892 European ancestry controls, 14,068 East Asian ancestry cases, 13,104 East Asian ancestry controls	9p24.1	9	8545593	y	NR	PTPRD			5789			rs76007978-A	rs76007978	0	76007978	intron_variant	0	0.0123	4e-07	6.39794	(EA)	0.1781	[0.11-0.25] unit decrease	Illumina [~ 11800000] (imputed)	N
2017-11-14	25751625	Michailidou K	2015-04-01	Nat Genet	www.ncbi.nlm.nih.gov/pubmed/25751625	Genome-wide association analysis of more than 120,000 individuals identifies 15 new susceptibility loci for breast cancer.	Breast cancer	15,748 European ancestry cases, 18,084 European ancestry controls	46,785 European ancestry cases, 42,892 European ancestry controls	5q11.2	5	58888234	y	NR	RAB3C - PDE4D	115827	5144		28840	80804	rs10472076-C	rs10472076	0	10472076	intergenic_variant	1	0.38	2e-08	7.69897		1.05	[1.03-1.07]	Affymetrix, Illumina [~ 11600000] (imputed)	N
2017-11-30	29059683	Michailidou K	2017-10-23	Nature	www.ncbi.nlm.nih.gov/pubmed/29059683	Association analysis identifies 65 new breast cancer risk loci.	Breast cancer	76,192 European ancestry cases, 63,082 European ancestry controls	46,785 European ancestry cases, 42,892 European ancestry controls, 14,068 East Asian ancestry cases, 13,104 East Asian ancestry controls	5q11.2	5	58888234	y	RAB3C	RAB3C - PDE4D	115827	5144		28840	80804	rs10472076-C	rs10472076	0	10472076	intergenic_variant	1	0.38	1e-08	8	(EA)	1.03	[1.01-1.04] (Oncoarray)	Illumina [~ 11800000] (imputed)	N
2013-09-12	23535729	Michailidou K	2013-04-01	Nat Genet	www.ncbi.nlm.nih.gov/pubmed/23535729	Large-scale genotyping identifies 41 new loci associated with breast cancer risk.	Breast cancer	10,052 European ancestry cases, 12,575 European ancestry controls	45,290 European ancestry cases, 41,880 European ancestry controls	5q11.2	5	58888234	y	RAB3C	RAB3C - PDE4D	115827	5144		28840	80804	rs10472076-C	rs10472076	0	10472076	intergenic_variant	1	0.38	3e-08	7.52288		1.05	[1.03-1.07]	Affymetrix, Illumina [~ 2600000] (imputed)	N
2017-11-30	29059683	Michailidou K	2017-10-23	Nature	www.ncbi.nlm.nih.gov/pubmed/29059683	Association analysis identifies 65 new breast cancer risk loci.	Breast cancer	76,192 European ancestry cases, 63,082 European ancestry controls	46,785 European ancestry cases, 42,892 European ancestry controls, 14,068 East Asian ancestry cases, 13,104 East Asian ancestry controls	5q14.3	5	91493653	y	NR	RAB5CP2 - LOC107986434	133789	107986434		16633	111053	rs332529-A	rs332529	0	332529	intergenic_variant	1	0.1605	9e-12	11.0458	(EA)	0.0606	[0.043-0.078] unit decrease	Illumina [~ 11800000] (imputed)	N
2017-11-30	29059683	Michailidou K	2017-10-23	Nature	www.ncbi.nlm.nih.gov/pubmed/29059683	Association analysis identifies 65 new breast cancer risk loci.	Breast cancer	76,192 European ancestry cases, 63,082 European ancestry controls	46,785 European ancestry cases, 42,892 European ancestry controls, 14,068 East Asian ancestry cases, 13,104 East Asian ancestry controls	5q14.3	5	91594201	y	NR	RAB5CP2 - LOC107986434	133789	107986434		117181	10505	rs7721647-T	rs7721647	0	7721647	intergenic_variant	1	0.3015	2e-06	5.69897	(EA)	0.032	[0.019-0.045] unit decrease	Illumina [~ 11800000] (imputed)	N
2017-11-30	29059683	Michailidou K	2017-10-23	Nature	www.ncbi.nlm.nih.gov/pubmed/29059683	Association analysis identifies 65 new breast cancer risk loci.	Breast cancer	76,192 European ancestry cases, 63,082 European ancestry controls	46,785 European ancestry cases, 42,892 European ancestry controls, 14,068 East Asian ancestry cases, 13,104 East Asian ancestry controls	14q24.1	14	68214759	y	NR	RAD51B			5890			rs1744947-T	rs1744947	0	1744947	intron_variant	0	0.16	2e-14	13.699	(EA)	0.0645	[0.048-0.081] unit increase	Illumina [~ 11800000] (imputed)	N
2017-11-30	29059683	Michailidou K	2017-10-23	Nature	www.ncbi.nlm.nih.gov/pubmed/29059683	Association analysis identifies 65 new breast cancer risk loci.	Breast cancer	76,192 European ancestry cases, 63,082 European ancestry controls	46,785 European ancestry cases, 42,892 European ancestry controls, 14,068 East Asian ancestry cases, 13,104 East Asian ancestry controls	14q24.1	14	68513118	y	NR	RAD51B			5890			rs11624333-C	rs11624333	0	11624333	intron_variant	0	0.2595	7e-42	41.1549	(EA)	0.0968	[0.083-0.111] unit decrease	Illumina [~ 11800000] (imputed)	N
2017-11-14	25751625	Michailidou K	2015-04-01	Nat Genet	www.ncbi.nlm.nih.gov/pubmed/25751625	Genome-wide association analysis of more than 120,000 individuals identifies 15 new susceptibility loci for breast cancer.	Breast cancer	15,748 European ancestry cases, 18,084 European ancestry controls	46,785 European ancestry cases, 42,892 European ancestry controls	14q24.1	14	68193711	y	NR	RAD51B			5890			rs2588809-T	rs2588809	0	2588809	intron_variant	0	0.16	2e-08	7.69897		1.08	[1.05-1.11]	Affymetrix, Illumina [~ 11600000] (imputed)	N
2017-11-14	25751625	Michailidou K	2015-04-01	Nat Genet	www.ncbi.nlm.nih.gov/pubmed/25751625	Genome-wide association analysis of more than 120,000 individuals identifies 15 new susceptibility loci for breast cancer.	Breast cancer	15,748 European ancestry cases, 18,084 European ancestry controls	46,785 European ancestry cases, 42,892 European ancestry controls	14q24.1	14	68567965	y	NR	RAD51B			5890			rs999737-C	rs999737	0	999737	intron_variant	0	0.77	2e-21	20.699		1.08696	[1.06-1.11]	Affymetrix, Illumina [~ 11600000] (imputed)	N
2017-12-19	29058716	Milne RL	2017-10-23	Nat Genet	www.ncbi.nlm.nih.gov/pubmed/29058716	Identification of ten variants associated with risk of estrogen-receptor-negative breast cancer.	Breast cancer (estrogen-receptor negative)	14,135 European ancestry cases, 58,126 European ancestry controls	7,333 European ancestry cases, 42,468 European ancestry controls	14q24.1	14	68567965	y	NR	RAD51B			5890			rs999737-C	rs999737	0	999737	intron_variant	0	0.77	3e-08	7.52288		1.08696	[1.04-1.12] (Oncoarray)	Illumina [~ 11500000] (imputed)	N
2017-11-30	29059683	Michailidou K	2017-10-23	Nature	www.ncbi.nlm.nih.gov/pubmed/29059683	Association analysis identifies 65 new breast cancer risk loci.	Breast cancer	76,192 European ancestry cases, 63,082 European ancestry controls	46,785 European ancestry cases, 42,892 European ancestry controls, 14,068 East Asian ancestry cases, 13,104 East Asian ancestry controls	14q24.1	14	68567965	y	RAD51B	RAD51B			5890			rs999737-C	rs999737	0	999737	intron_variant	0	0.77	7e-39	38.1549	(EA)	1.0989	[1.08-1.12] (Oncoarray)	Illumina [~ 11800000] (imputed)	N
2017-11-30	29059683	Michailidou K	2017-10-23	Nature	www.ncbi.nlm.nih.gov/pubmed/29059683	Association analysis identifies 65 new breast cancer risk loci.	Breast cancer	76,192 European ancestry cases, 63,082 European ancestry controls	46,785 European ancestry cases, 42,892 European ancestry controls, 14,068 East Asian ancestry cases, 13,104 East Asian ancestry controls	14q24.1	14	68193711	y	RAD51B	RAD51B			5890			rs2588809-T	rs2588809	0	2588809	intron_variant	0	0.17	6e-14	13.2218	(EA)	1.06	[1.03-1.08] (Oncoarray)	Illumina [~ 11800000] (imputed)	N
2012-12-02	23001122	Orr N	2012-09-23	Nat Genet	www.ncbi.nlm.nih.gov/pubmed/23001122	Genome-wide association study identifies a common variant in RAD51B associated with male breast cancer risk.	Breast cancer (male)	823 European ancestry cases, 2,795 European ancestry controls	438 European ancestry cases, 474 European ancestry controls	14q24.1	14	68232877	y	RAD51B	RAD51B			5890			rs1314913-?	rs1314913	0	1314913	intron_variant	0	NR	3e-13	12.5229		1.57	[1.39-1.77]	Illumina [447760]	N
2009-04-03	19330030	Thomas G	2009-03-29	Nat Genet	www.ncbi.nlm.nih.gov/pubmed/19330030	A multistage genome-wide association study in breast cancer identifies two new risk alleles at 1p11.2 and 14q24.1 (RAD51L1).	Breast cancer	1,145 European ancestry cases, 1,142 European ancestry controls	8,625 European ancestry cases, 9,657 European ancestry controls	14q24.1	14	68567965	y	RAD51L1	RAD51B			5890			rs999737-C	rs999737	0	999737	intron_variant	0	0.76	2e-07	6.69897		1.06	[1.01-1.14] (Het)	Illumina [528173]	N
2013-09-12	23535729	Michailidou K	2013-04-01	Nat Genet	www.ncbi.nlm.nih.gov/pubmed/23535729	Large-scale genotyping identifies 41 new loci associated with breast cancer risk.	Breast cancer	10,052 European ancestry cases, 12,575 European ancestry controls	45,290 European ancestry cases, 41,880 European ancestry controls	14q24.1	14	68193711	y	RAD51L1	RAD51B			5890			rs2588809-T	rs2588809	0	2588809	intron_variant	0	0.16	1e-10	10		1.08	[1.05-1.11]	Affymetrix, Illumina [~ 2600000] (imputed)	N
2013-09-12	23535729	Michailidou K	2013-04-01	Nat Genet	www.ncbi.nlm.nih.gov/pubmed/23535729	Large-scale genotyping identifies 41 new loci associated with breast cancer risk.	Breast cancer	10,052 European ancestry cases, 12,575 European ancestry controls	45,290 European ancestry cases, 41,880 European ancestry controls	14q24.1	14	68567965	y	RAD51L1	RAD51B			5890			rs999737-C	rs999737	0	999737	intron_variant	0	0.77	3e-19	18.5229		1.09	[1.06-1.11]	Affymetrix, Illumina [~ 2600000] (imputed)	N
2012-02-14	22232737	Shu XO	2012-01-09	Cancer Res	www.ncbi.nlm.nih.gov/pubmed/22232737	Novel genetic markers of breast cancer survival identified by a genome-wide association study.	Breast cancer (survival)	1,950 Chinese ancestry cases	4,160 Chinese ancestry cases	14q24.1	14	68283210	y	RAD51L1	RAD51B			5890			rs3784099-A	rs3784099	0	3784099	intron_variant	0	NR	1e-07	7	(Total Mortality)	1.49	[1.28-1.72]	Affymetrix [613031]	N
2012-02-14	22232737	Shu XO	2012-01-09	Cancer Res	www.ncbi.nlm.nih.gov/pubmed/22232737	Novel genetic markers of breast cancer survival identified by a genome-wide association study.	Breast cancer (survival)	1,950 Chinese ancestry cases	4,160 Chinese ancestry cases	14q24.1	14	68283210	y	RAD51L1	RAD51B			5890			rs3784099-A	rs3784099	0	3784099	intron_variant	0	NR	3e-07	6.52288	(Recurrence)	1.43	[1.25-1.64]	Affymetrix [613031]	N
2013-06-06	23468962	Song C	2013-02-28	PLoS One	www.ncbi.nlm.nih.gov/pubmed/23468962	A genome-wide scan for breast cancer risk haplotypes among African American women.	Breast cancer	3,016 African American cases, 2,745 African American controls	NA	14q24.1	14;14;14;14;14;14	68497029;68506829;68507560;68505059;68500665;68508657	y		RAD51B; RAD51B; RAD51B; RAD51B; RAD51B; RAD51B						rs765899-?; rs757369-?; rs10132579-?; rs2842347-?; rs737387-?; rs2842346-?	rs765899; rs757369; rs10132579; rs2842347; rs737387; rs2842346	0		intron_variant; intron_variant; intron_variant; intron_variant; intron_variant; intron_variant		NR	2e-06	5.69897		1.67	[1.35-2.08]	Illumina [1006480]	N
2012-11-30	22976474	Siddiq A	2012-09-13	Hum Mol Genet	www.ncbi.nlm.nih.gov/pubmed/22976474	A meta-analysis of genome-wide association studies of breast cancer identifies two novel susceptibility loci at 6q14 and 20q11.	Breast cancer	3,666 European ancestry cases, 28,864 European ancestry controls, 1,004 African American cases, 2,744 African American controls	562 European ancestry cases, 6,410 European ancestry controls, 84 Japanese ancestry cases, 830 Japanese ancestry controls, 300 Latino cases, 1,164 Latino controls	20q11.22	20	34000289	y	RALY, EIF2S2, ASIP	RALY			22913			rs2284378-T	rs2284378	0	2284378	intron_variant	0	0.31	1e-08	8		1.16	[1.10-1.22]	Illumina [2608509] (imputed)	N
2017-11-30	29059683	Michailidou K	2017-10-23	Nature	www.ncbi.nlm.nih.gov/pubmed/29059683	Association analysis identifies 65 new breast cancer risk loci.	Breast cancer	76,192 European ancestry cases, 63,082 European ancestry controls	46,785 European ancestry cases, 42,892 European ancestry controls, 14,068 East Asian ancestry cases, 13,104 East Asian ancestry controls	6p23	6	13713134	y	NR	RANBP9 - MCUR1	10048	63933		1552	73415	rs418053-C	rs418053	0	418053	intergenic_variant	1	0.5685	1e-13	13	(EA)	0.0465	[0.034-0.059] unit decrease	Illumina [~ 11800000] (imputed)	N
2017-11-14	25751625	Michailidou K	2015-04-01	Nat Genet	www.ncbi.nlm.nih.gov/pubmed/25751625	Genome-wide association analysis of more than 120,000 individuals identifies 15 new susceptibility loci for breast cancer.	Breast cancer	15,748 European ancestry cases, 18,084 European ancestry controls	46,785 European ancestry cases, 42,892 European ancestry controls	6p23	6	13722291	y	NR	RANBP9 - MCUR1	10048	63933		10709	64258	rs204247-G	rs204247	0	204247	intergenic_variant	1	0.44	4e-10	9.39794		1.05	[1.03-1.07]	Affymetrix, Illumina [~ 11600000] (imputed)	N
2017-11-30	29059683	Michailidou K	2017-10-23	Nature	www.ncbi.nlm.nih.gov/pubmed/29059683	Association analysis identifies 65 new breast cancer risk loci.	Breast cancer	76,192 European ancestry cases, 63,082 European ancestry controls	46,785 European ancestry cases, 42,892 European ancestry controls, 14,068 East Asian ancestry cases, 13,104 East Asian ancestry controls	6p23	6	13722291	y	RANBP9	RANBP9 - MCUR1	10048	63933		10709	64258	rs204247-G	rs204247	0	204247	intergenic_variant	1	0.44	8e-13	12.0969	(EA)	1.04	[1.02-1.06] (Oncoarray)	Illumina [~ 11800000] (imputed)	N
2013-09-12	23535729	Michailidou K	2013-04-01	Nat Genet	www.ncbi.nlm.nih.gov/pubmed/23535729	Large-scale genotyping identifies 41 new loci associated with breast cancer risk.	Breast cancer	10,052 European ancestry cases, 12,575 European ancestry controls	45,290 European ancestry cases, 41,880 European ancestry controls	6p23	6	13722291	y	RANBP9	RANBP9 - MCUR1	10048	63933		10709	64258	rs204247-G	rs204247	0	204247	intergenic_variant	1	0.43	8e-09	8.09691		1.05	[1.03-1.07]	Affymetrix, Illumina [~ 2600000] (imputed)	N
2017-11-30	29059683	Michailidou K	2017-10-23	Nature	www.ncbi.nlm.nih.gov/pubmed/29059683	Association analysis identifies 65 new breast cancer risk loci.	Breast cancer	76,192 European ancestry cases, 63,082 European ancestry controls	46,785 European ancestry cases, 42,892 European ancestry controls, 14,068 East Asian ancestry cases, 13,104 East Asian ancestry controls	3q23	3	141547651	y	NR	RASA2			5922			rs6776003-A	rs6776003	0	6776003	intron_variant	0	0.4178	3e-10	9.52288	(EA)	0.0394	[0.027-0.052] unit increase	Illumina [~ 11800000] (imputed)	N
2017-11-30	29059683	Michailidou K	2017-10-23	Nature	www.ncbi.nlm.nih.gov/pubmed/29059683	Association analysis identifies 65 new breast cancer risk loci.	Breast cancer	76,192 European ancestry cases, 63,082 European ancestry controls	46,785 European ancestry cases, 42,892 European ancestry controls, 14,068 East Asian ancestry cases, 13,104 East Asian ancestry controls	18q11.2	18	23047728	y	NR	RBBP8 - LOC105372022	5932	105372022		21242	85979	rs9675999-A	rs9675999	0	9675999	intergenic_variant	1	0.6392	7e-07	6.1549	(EA)	0.0319	[0.019-0.044] unit decrease	Illumina [~ 11800000] (imputed)	N
2017-11-30	29059683	Michailidou K	2017-10-23	Nature	www.ncbi.nlm.nih.gov/pubmed/29059683	Association analysis identifies 65 new breast cancer risk loci.	Breast cancer	76,192 European ancestry cases, 63,082 European ancestry controls	46,785 European ancestry cases, 42,892 European ancestry controls, 14,068 East Asian ancestry cases, 13,104 East Asian ancestry controls	22q13.2	22	41061455	y	NR	RBX1 - RPS9P2	9978	267009		88440	2541	rs141447235-C	rs141447235	0	141447235	intergenic_variant	1	0.064	2e-09	8.69897	(EA)	0.0772	[0.052-0.102] unit increase	Illumina [~ 11800000] (imputed)	N
2017-11-30	29059683	Michailidou K	2017-10-23	Nature	www.ncbi.nlm.nih.gov/pubmed/29059683	Association analysis identifies 65 new breast cancer risk loci.	Breast cancer	76,192 European ancestry cases, 63,082 European ancestry controls	46,785 European ancestry cases, 42,892 European ancestry controls, 14,068 East Asian ancestry cases, 13,104 East Asian ancestry controls	15q26.1	15	90965985	y	NR	RCCD1 - PRC1	91433	9055		1127	53	rs77554484-A	rs77554484	0	77554484	intergenic_variant	1	0.1319	1e-15	15	(EA)	0.0741	[0.056-0.092] unit decrease	Illumina [~ 11800000] (imputed)	N
2017-11-30	29059683	Michailidou K	2017-10-23	Nature	www.ncbi.nlm.nih.gov/pubmed/29059683	Association analysis identifies 65 new breast cancer risk loci.	Breast cancer	76,192 European ancestry cases, 63,082 European ancestry controls	46,785 European ancestry cases, 42,892 European ancestry controls, 14,068 East Asian ancestry cases, 13,104 East Asian ancestry controls	10q26.11	10	119567672	y	NR	RGS10 - TIAL1	6001	7073		24920	5793	rs9421352-T	rs9421352	0	9421352	intergenic_variant	1	0.2453	1e-07	7	(EA)	0.0389	[0.024-0.053] unit increase	Illumina [~ 11800000] (imputed)	N
2017-11-30	29059683	Michailidou K	2017-10-23	Nature	www.ncbi.nlm.nih.gov/pubmed/29059683	Association analysis identifies 65 new breast cancer risk loci.	Breast cancer	76,192 European ancestry cases, 63,082 European ancestry controls	46,785 European ancestry cases, 42,892 European ancestry controls, 14,068 East Asian ancestry cases, 13,104 East Asian ancestry controls	20p11.23	20	19772894	y	NR	RIN2			54453			rs4814894-A	rs4814894	0	4814894	intron_variant	0	0.4507	7e-07	6.1549	(EA)	0.0323	[0.02-0.045] unit increase	Illumina [~ 11800000] (imputed)	N
2017-12-19	29058716	Milne RL	2017-10-23	Nat Genet	www.ncbi.nlm.nih.gov/pubmed/29058716	Identification of ten variants associated with risk of estrogen-receptor-negative breast cancer.	Breast cancer (estrogen-receptor negative)	14,135 European ancestry cases, 58,126 European ancestry controls	7,333 European ancestry cases, 42,468 European ancestry controls	14q32.12	14	92637727	y	NR	RIN3			79890			rs11627032-T	rs11627032	0	11627032	intron_variant	0	0.75	2e-06	5.69897		1.05263	[1.01-1.09] (Oncoarray)	Illumina [~ 11500000] (imputed)	N
2017-11-30	29059683	Michailidou K	2017-10-23	Nature	www.ncbi.nlm.nih.gov/pubmed/29059683	Association analysis identifies 65 new breast cancer risk loci.	Breast cancer	76,192 European ancestry cases, 63,082 European ancestry controls	46,785 European ancestry cases, 42,892 European ancestry controls, 14,068 East Asian ancestry cases, 13,104 East Asian ancestry controls	14q32.12	14	92637727	y	RIN3	RIN3			79890			rs11627032-T	rs11627032	0	11627032	intron_variant	0	0.75	4e-11	10.3979	(EA)	1.04167	[1.02-1.06] (Oncoarray)	Illumina [~ 11800000] (imputed)	N
2017-11-14	25751625	Michailidou K	2015-04-01	Nat Genet	www.ncbi.nlm.nih.gov/pubmed/25751625	Genome-wide association analysis of more than 120,000 individuals identifies 15 new susceptibility loci for breast cancer.	Breast cancer	15,748 European ancestry cases, 18,084 European ancestry controls	46,785 European ancestry cases, 42,892 European ancestry controls	14q32.12	14	92637727	y	RIN3	RIN3			79890			rs11627032-T	rs11627032	0	11627032	intron_variant	0	0.74	4e-09	8.39794		1.06383	[1.04-1.09]	Affymetrix, Illumina [~ 11600000] (imputed)	N
2017-11-30	29059683	Michailidou K	2017-10-23	Nature	www.ncbi.nlm.nih.gov/pubmed/29059683	Association analysis identifies 65 new breast cancer risk loci.	Breast cancer	76,192 European ancestry cases, 63,082 European ancestry controls	46,785 European ancestry cases, 42,892 European ancestry controls, 14,068 East Asian ancestry cases, 13,104 East Asian ancestry controls	8q24.13	8	123597926	y	intergenic	RN7SKP155 - KLHL38	106479164	340359		8880	46516	rs58847541-G	rs58847541	0	58847541	regulatory_region_variant	1	0.15	6e-13	12.2218	(EA)	1.08	[1.05-1.1] (Oncoarray)	Illumina [~ 11800000] (imputed)	N
2017-11-30	29059683	Michailidou K	2017-10-23	Nature	www.ncbi.nlm.nih.gov/pubmed/29059683	Association analysis identifies 65 new breast cancer risk loci.	Breast cancer	76,192 European ancestry cases, 63,082 European ancestry controls	46,785 European ancestry cases, 42,892 European ancestry controls, 14,068 East Asian ancestry cases, 13,104 East Asian ancestry controls	7q21.3	7	98065546	y	NR	RN7SL478P - LMTK2	106481053	22853		66924	41322	rs847577-A	rs847577	0	847577	intergenic_variant	1	0.4176	6e-06	5.22185	(EA)	0.0284	[0.016-0.041] unit decrease	Illumina [~ 11800000] (imputed)	N
2017-11-30	29059683	Michailidou K	2017-10-23	Nature	www.ncbi.nlm.nih.gov/pubmed/29059683	Association analysis identifies 65 new breast cancer risk loci.	Breast cancer	76,192 European ancestry cases, 63,082 European ancestry controls	46,785 European ancestry cases, 42,892 European ancestry controls, 14,068 East Asian ancestry cases, 13,104 East Asian ancestry controls	2q33.1	2	200849597	y	NR	RNA5SP115 - CLK1	100873385	1195		453	3412	rs5837757-C	rs5837757	0	5837757	intergenic_variant	1	0.1716	1e-07	7	(EA)	0.0438	[0.028-0.06] unit increase	Illumina [~ 11800000] (imputed)	N
2017-11-14	25751625	Michailidou K	2015-04-01	Nat Genet	www.ncbi.nlm.nih.gov/pubmed/25751625	Genome-wide association analysis of more than 120,000 individuals identifies 15 new susceptibility loci for breast cancer.	Breast cancer	15,748 European ancestry cases, 18,084 European ancestry controls	46,785 European ancestry cases, 42,892 European ancestry controls	1q21.1	1	145790097	y	LOC10028814, NBPF10, RNF115	RNF115			27246			rs12405132-C	rs12405132	0	12405132	intron_variant	0	0.64	8e-09	8.09691		1.05263	[1.03-1.08]	Affymetrix, Illumina [~ 11600000] (imputed)	N
2017-11-30	29059683	Michailidou K	2017-10-23	Nature	www.ncbi.nlm.nih.gov/pubmed/29059683	Association analysis identifies 65 new breast cancer risk loci.	Breast cancer	76,192 European ancestry cases, 63,082 European ancestry controls	46,785 European ancestry cases, 42,892 European ancestry controls, 14,068 East Asian ancestry cases, 13,104 East Asian ancestry controls	1q21.1	1	145790097	y	RNF115	RNF115			27246			rs12405132-C	rs12405132	0	12405132	intron_variant	0	0.63	6e-10	9.22185	(EA)	1.03093	[1.01-1.05] (Oncoarray)	Illumina [~ 11800000] (imputed)	N
2008-06-16	18326623	Gold B	2008-03-11	Proc Natl Acad Sci U S A	www.ncbi.nlm.nih.gov/pubmed/18326623	Genome-wide association study provides evidence for a breast cancer risk locus at 6q22.33.	Breast cancer	249 Ashkenazi Jewish non-BRCA1/2 carriers cases, 299 Ashkenazi Jewish non-BRCA1/2 carriers controls	1,193 Ashkenazi Jewish non-BRCA1/2 carriers cases,1,166 Ashkenazi Jewish non-BRCA1/2 carriers controls	6q22.33	6	127279485	y	ECHDC1, RNF146	RNF146			81847			rs2180341-G	rs2180341	0	2180341	intron_variant	0	0.21	3e-08	7.52288		1.41	[1.25-1.59]	Affymetrix [150080]	N
2017-11-30	29059683	Michailidou K	2017-10-23	Nature	www.ncbi.nlm.nih.gov/pubmed/29059683	Association analysis identifies 65 new breast cancer risk loci.	Breast cancer	76,192 European ancestry cases, 63,082 European ancestry controls	46,785 European ancestry cases, 42,892 European ancestry controls, 14,068 East Asian ancestry cases, 13,104 East Asian ancestry controls	8q22.2	8	100298199	y	NR	RNF19A			25897			rs35748790-TA	rs35748790	0	35748790	intron_variant	0	0.3649	3e-06	5.52288	(EA)	0.0317	[0.018-0.045] unit decrease	Illumina [~ 11800000] (imputed)	N
2017-11-30	29059683	Michailidou K	2017-10-23	Nature	www.ncbi.nlm.nih.gov/pubmed/29059683	Association analysis identifies 65 new breast cancer risk loci.	Breast cancer	76,192 European ancestry cases, 63,082 European ancestry controls	46,785 European ancestry cases, 42,892 European ancestry controls, 14,068 East Asian ancestry cases, 13,104 East Asian ancestry controls	6q22.31	6	122394099	y	NR	RNU1-18P - HSF2	100873815	3298		182288	5452	rs74392007-T	rs74392007	0	74392007	intergenic_variant	1	0.1102	3e-07	6.52288	(EA)	0.0514	[0.032-0.071] unit increase	Illumina [~ 11800000] (imputed)	N
2017-03-31	27117709	Couch FJ	2016-04-27	Nat Commun	www.ncbi.nlm.nih.gov/pubmed/27117709	Identification of four novel susceptibility loci for oestrogen receptor negative breast cancer.	Breast cancer	4,939 European ancestry estrogen receptor-negative cases, 14,352 European ancestry controls	7,333 European ancestry estrogen receptor-negative cases, 7,797 European ancestry BRCA1 mutation carrier cases, 7,455 European ancestry BRCA1 mutation carrier controls, 42,468 European ancestry controls	13q22.1	13	73232845	y	KLF12, KLF5	RNY1P8 - MARK2P12	100873807	100421565		5585	174944	rs12870942-?	rs12870942	0	12870942	intergenic_variant	1	0.3	4e-08	7.39794		1.06	[1.01-1.10] (BRCA1 carriers)	Illumina [10909381] (imputed)	N
2017-12-19	29058716	Milne RL	2017-10-23	Nat Genet	www.ncbi.nlm.nih.gov/pubmed/29058716	Identification of ten variants associated with risk of estrogen-receptor-negative breast cancer.	Breast cancer (estrogen-receptor negative)	14,135 European ancestry cases, 58,126 European ancestry controls	7,333 European ancestry cases, 42,468 European ancestry controls	13q22.1	13	73383544	y	KLF5	RNY1P8 - MARK2P12	100873807	100421565		156284	24245	rs6562760-G	rs6562760	0	6562760	intergenic_variant	1	0.76	9e-10	9.04576		1.08696	[1.05-1.11]	Illumina [~ 11500000] (imputed)	N
2017-12-19	29058716	Milne RL	2017-10-23	Nat Genet	www.ncbi.nlm.nih.gov/pubmed/29058716	Identification of ten variants associated with risk of estrogen-receptor-negative breast cancer.	Breast Cancer in BRCA1 mutation carriers	7,784 European ancestry carrier cases, 7,782 European ancestry carrier controls	1,630 European ancestry carrier cases, 1,712 European ancestry carrier controls	13q22.1	13	73383544	y	KLF5	RNY1P8 - MARK2P12	100873807	100421565		156284	24245	rs6562760-G	rs6562760	0	6562760	intergenic_variant	1	0.76	4e-07	6.39794		1.1236	[1.08-1.16]	Illumina [~ 11500000] (imputed)	N
2017-03-31	27117709	Couch FJ	2016-04-27	Nat Commun	www.ncbi.nlm.nih.gov/pubmed/27117709	Identification of four novel susceptibility loci for oestrogen receptor negative breast cancer.	Breast cancer	4,939 European ancestry estrogen receptor-negative cases, 14,352 European ancestry controls	7,333 European ancestry estrogen receptor-negative cases, 7,797 European ancestry BRCA1 mutation carrier cases, 7,455 European ancestry BRCA1 mutation carrier controls, 42,468 European ancestry controls	13q22.1	13	73383544	y	KLF5, KLF12	RNY1P8 - MARK2P12	100873807	100421565		156284	24245	rs6562760-?	rs6562760	0	6562760	intergenic_variant	1	0.8	5e-10	9.30103		1.1236	[1.06-1.18] (BRCA1 carriers)	Illumina [10909381] (imputed)	N
2017-03-31	27117709	Couch FJ	2016-04-27	Nat Commun	www.ncbi.nlm.nih.gov/pubmed/27117709	Identification of four novel susceptibility loci for oestrogen receptor negative breast cancer.	Breast cancer (estrogen-receptor negative)	4,939 European ancestry cases, 14,352 European ancestry controls	7,333 European ancestry cases, 42,468 European ancestry controls	13q22.1	13	73232845	y	KLF5, KLF12	RNY1P8 - MARK2P12	100873807	100421565		5585	174944	rs12870942-?	rs12870942	0	12870942	intergenic_variant	1	0.32	3e-07	6.52288		1.09	[1.05-1.13]	Illumina [10909381] (imputed)	N
2011-04-13	21424380	Sehrawat B	2011-03-19	Hum Genet	www.ncbi.nlm.nih.gov/pubmed/21424380	Potential novel candidate polymorphisms identified in genome-wide association study for breast cancer susceptibility.	Breast cancer	302 European ancestry female cases, 321 European ancestry female controls	1,153 European ancestry female cases, 1,215 European ancestry female controls	5p15.2	5	10467590	y	ROPN1L	ROPN1L			83853			rs1092913-T	rs1092913	0	1092913	intron_variant	0	0.13	2e-06	5.69897		1.45	[1.24-1.69]	Affymetrix [782838]	N
2017-11-30	29059683	Michailidou K	2017-10-23	Nature	www.ncbi.nlm.nih.gov/pubmed/29059683	Association analysis identifies 65 new breast cancer risk loci.	Breast cancer	76,192 European ancestry cases, 63,082 European ancestry controls	46,785 European ancestry cases, 42,892 European ancestry controls, 14,068 East Asian ancestry cases, 13,104 East Asian ancestry controls	8p12	8	29652100	y	intergenic	RPL17P33 - LINC00589	646909	619351		19417	69159	rs9693444-A	rs9693444	0	9693444	intergenic_variant	1	0.32	2e-21	20.699	(EA)	1.06	[1.04-1.08] (Oncoarray)	Illumina [~ 11800000] (imputed)	N
2013-09-12	23535729	Michailidou K	2013-04-01	Nat Genet	www.ncbi.nlm.nih.gov/pubmed/23535729	Large-scale genotyping identifies 41 new loci associated with breast cancer risk.	Breast cancer	10,052 European ancestry cases, 12,575 European ancestry controls	45,290 European ancestry cases, 41,880 European ancestry controls	8p12	8	29652100	y	intergenic	RPL17P33 - LINC00589	646909	619351		19417	69159	rs9693444-A	rs9693444	0	9693444	intergenic_variant	1	0.32	9e-14	13.0458		1.07	[1.05-1.09]	Affymetrix, Illumina [~ 2600000] (imputed)	N
2017-11-14	25751625	Michailidou K	2015-04-01	Nat Genet	www.ncbi.nlm.nih.gov/pubmed/25751625	Genome-wide association analysis of more than 120,000 individuals identifies 15 new susceptibility loci for breast cancer.	Breast cancer	15,748 European ancestry cases, 18,084 European ancestry controls	46,785 European ancestry cases, 42,892 European ancestry controls	8p12	8	29652100	y	NR	RPL17P33 - LINC00589	646909	619351		19417	69159	rs9693444-A	rs9693444	0	9693444	intergenic_variant	1	0.32	1e-12	12		1.07	[1.05-1.09]	Affymetrix, Illumina [~ 11600000] (imputed)	N
2017-11-30	29059683	Michailidou K	2017-10-23	Nature	www.ncbi.nlm.nih.gov/pubmed/29059683	Association analysis identifies 65 new breast cancer risk loci.	Breast cancer	76,192 European ancestry cases, 63,082 European ancestry controls	46,785 European ancestry cases, 42,892 European ancestry controls, 14,068 East Asian ancestry cases, 13,104 East Asian ancestry controls	8p23.3	8	220692	y	NR	RPL23AP53			644128			rs66823261-C	rs66823261	0	66823261	intron_variant	0	0.2289	3e-07	6.52288	(EA)	0.041	[0.025-0.057] unit increase	Illumina [~ 11800000] (imputed)	N
2017-12-19	29058716	Milne RL	2017-10-23	Nat Genet	www.ncbi.nlm.nih.gov/pubmed/29058716	Identification of ten variants associated with risk of estrogen-receptor-negative breast cancer.	Breast cancer	14,135 European ancestry ER- cases, 58,126 European ancestry controls, 7,784 European ancestry BRCA1 carrrier cases, 7,782 European ancestry BRCA1 carrrier controls	7,333 European ancestry ER- cases, 42,468 European ancestry controls, 1,630 European ancestry BRCA1 carrrier cases, 1,712 European ancestry BRCA1 carrrier controls	8p23.3	8	220692	y	RPL23AP53	RPL23AP53			644128			rs66823261-C	rs66823261	0	66823261	intron_variant	0	0.23	3e-08	7.52288		1.09	[1.06-1.12] (BCAC)	Illumina [~ 11500000] (imputed)	N
2017-12-19	29058716	Milne RL	2017-10-23	Nat Genet	www.ncbi.nlm.nih.gov/pubmed/29058716	Identification of ten variants associated with risk of estrogen-receptor-negative breast cancer.	Breast cancer (estrogen-receptor negative)	14,135 European ancestry cases, 58,126 European ancestry controls	7,333 European ancestry cases, 42,468 European ancestry controls	8p23.3	8	220692	y	RPL23AP53	RPL23AP53			644128			rs66823261-C	rs66823261	0	66823261	intron_variant	0	0.23	6e-09	8.22185		1.09	[1.06-1.12]	Illumina [~ 11500000] (imputed)	N
[truncated: 519 more rows]
